# Supplementary material for: Theoretical elucidation of the multi-functional synthetic methodology for switchable Ni(0)-catalyzed C–H allylations, alkenylations and dienylations with allenes
Source: Royal Society of Chemistry journal article supplement (doi:10.1039/d0cy00965b), 2020-01-01
Supplement: d0cy00965b1.pdf [file d0cy00965b1.pdf]

## Supporting Information

### Theoretical Elucidation of the Multi-Functional Synthetic Methodology for Switchable Ni(0)-Catalyzed C-H Allylations, Alkenylations and Dienylations with Allenes

Yuxia Liu,<sup>a,c,\*</sup> Kaifeng Wang,<sup>a</sup> Baoping Ling,<sup>a</sup> Guang Chen,<sup>a</sup> Yulin Li,<sup>b</sup> Lingjun Liu<sup>a,\*</sup>

and Siwei Bi<sup>a,\*</sup>

---

<sup>a</sup> School of Chemistry and Chemical Engineering, Qufu Normal University, Qufu 273165, P. R. China.  
E-mail: liuyuxia2008@163.com, siweibi@126.com, Fax: +86-537-4456305 ; Tel: +86-537-4458308

<sup>b</sup> Key Laboratory of Tibetan Medicine Research & Qinghai Key Laboratory of Qinghai-Tibet Plateau Biological Resources, Northwest Institute of Plateau Biology, Chinese Academy of Science, Xining 810001, Qinghai P. R. China

<sup>c</sup> Department of Chemical Engineering and §Waterloo Institute for Nanotechnology, University of Waterloo, 200 University Avenue West, Waterloo, Ontario, Canada, N2L 3G1

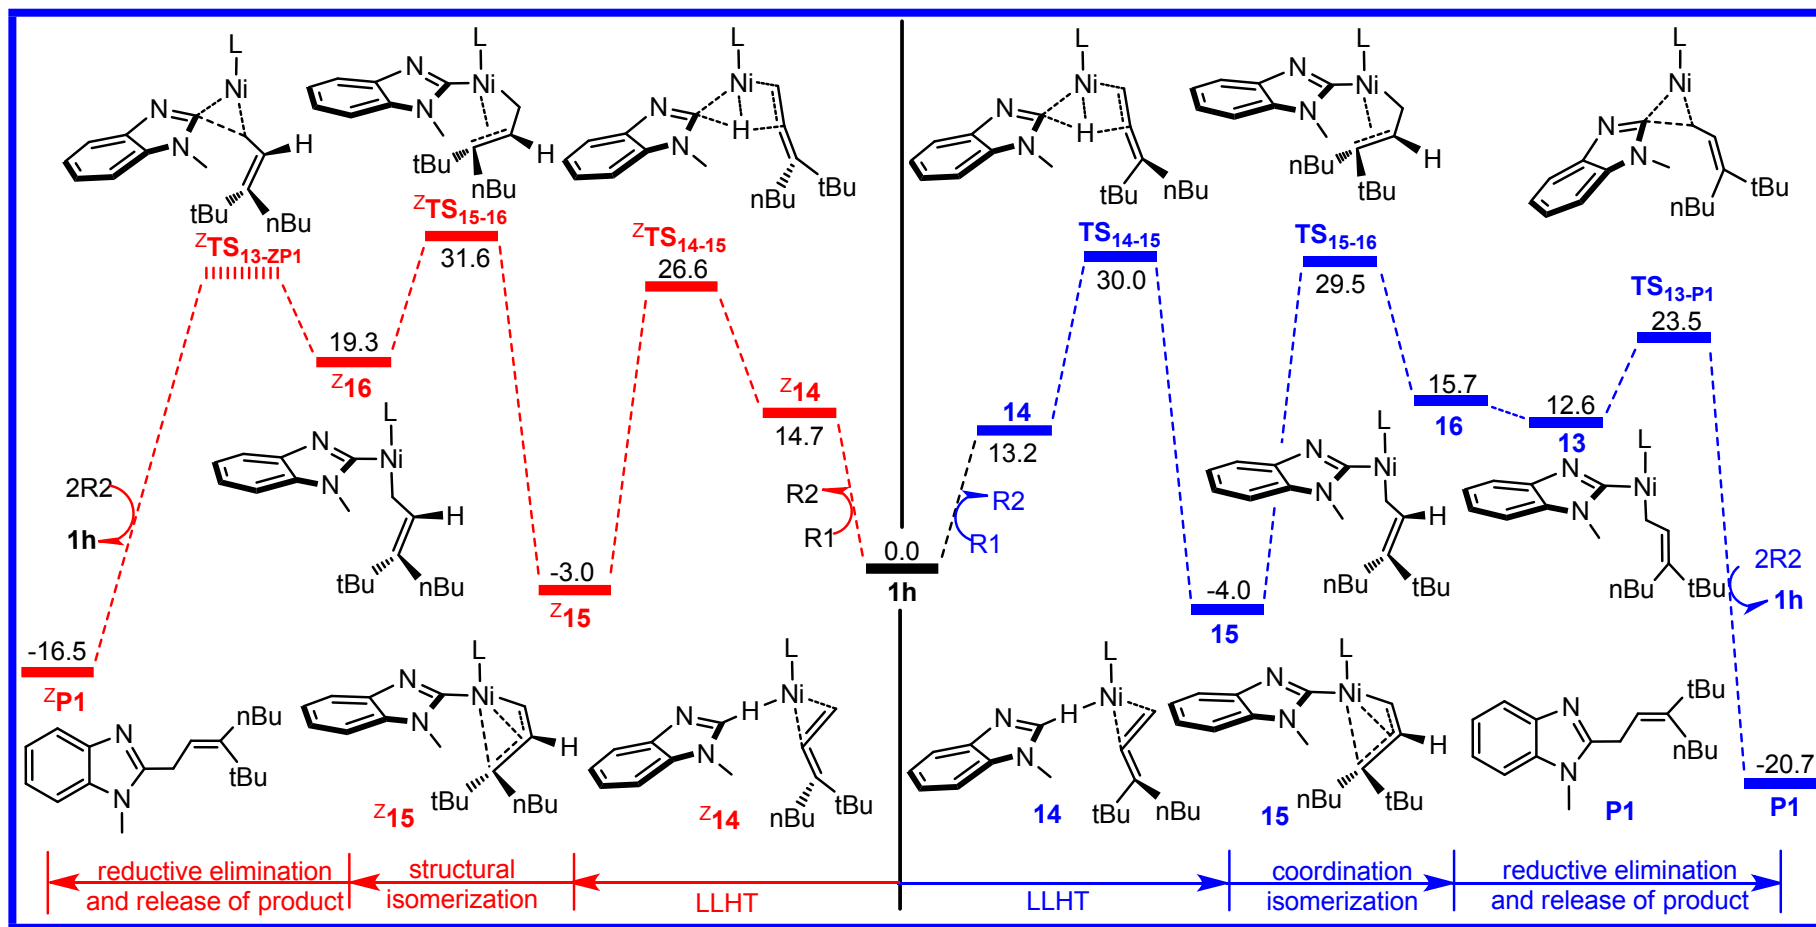

**Fig. S1** Calculated free energy profiles in toluene along possible LLHT pathways in the absence of base. The relative free energies and bond distances are given in kcal mol<sup>-1</sup> and Å, respectively.

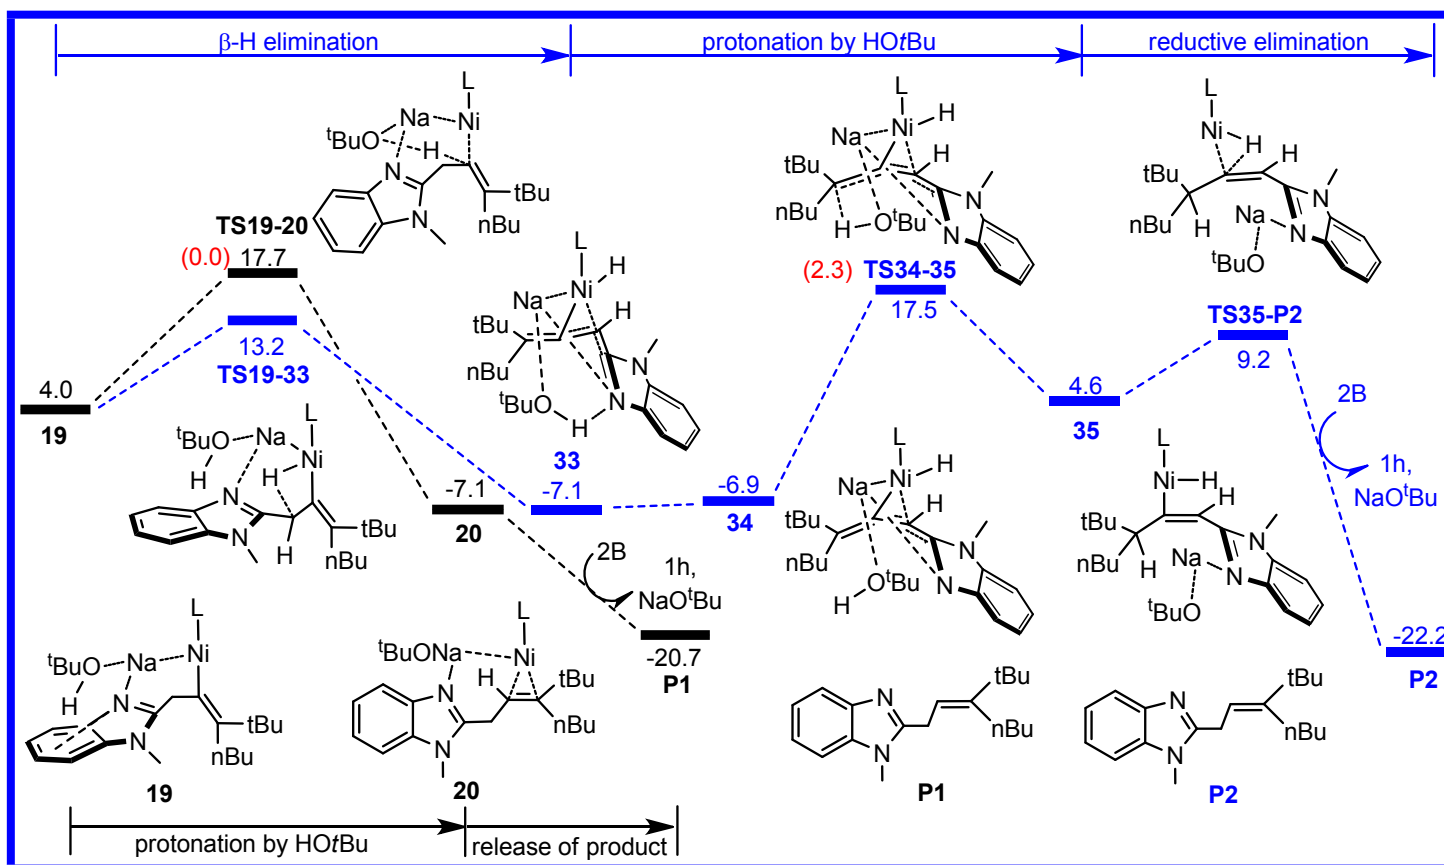

**Fig. S2** Calculated free energy profiles in toluene along the possible pathways starting from intermediate **19** in Fig. 2. The optimized relative free energies in toluene solution are provided in the parentheses. The relative free energies are given in kcal mol<sup>-1</sup>. L = IPr

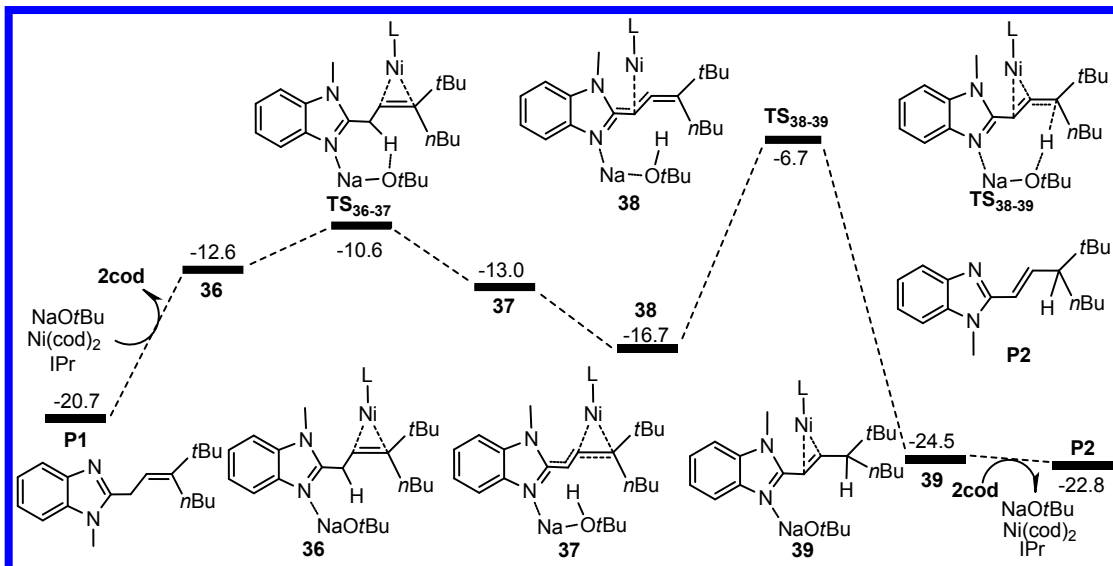

**Fig. S3** Calculated free energy profile in toluene along the possible pathway for forming **P2** from **P1** with Ni(cod)<sub>2</sub> involvement in the presence of NaOtBu. The relative free energies are given in kcal mol<sup>-1</sup>. L = IPr

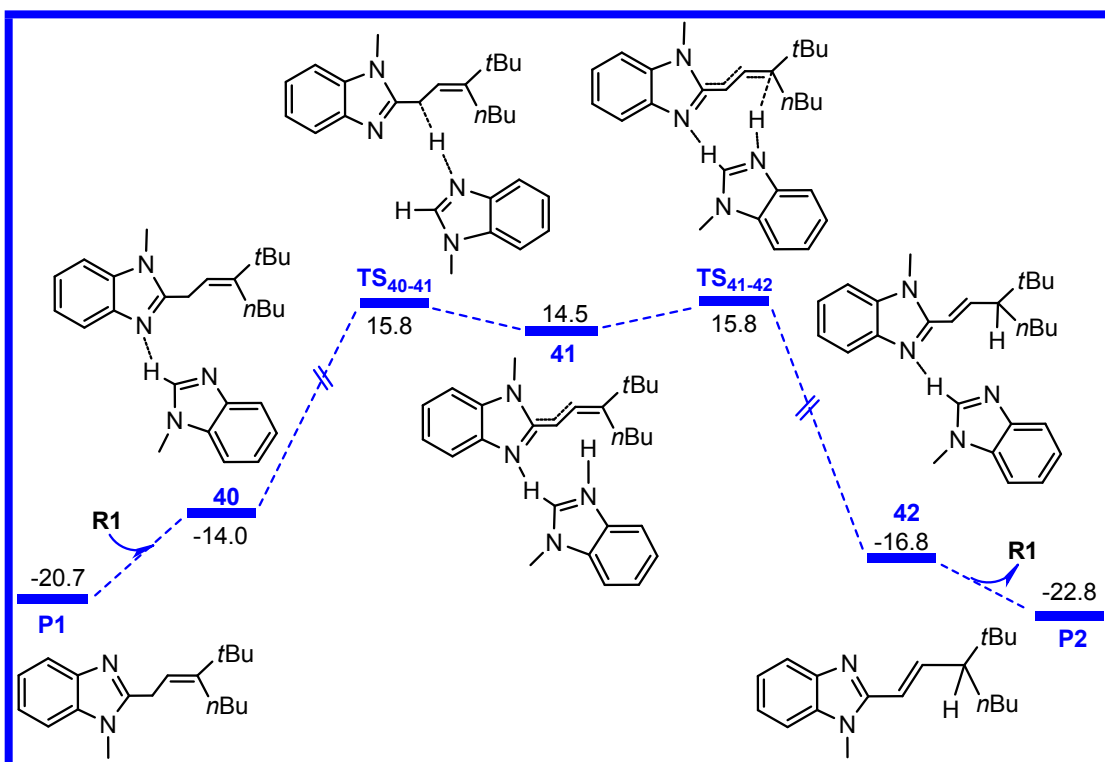

**Fig. S4** Calculated free energy profile in toluene for forming **P2** from **P1** assisted by **R1**. The relative free energies are given in kcal mol<sup>-1</sup>.

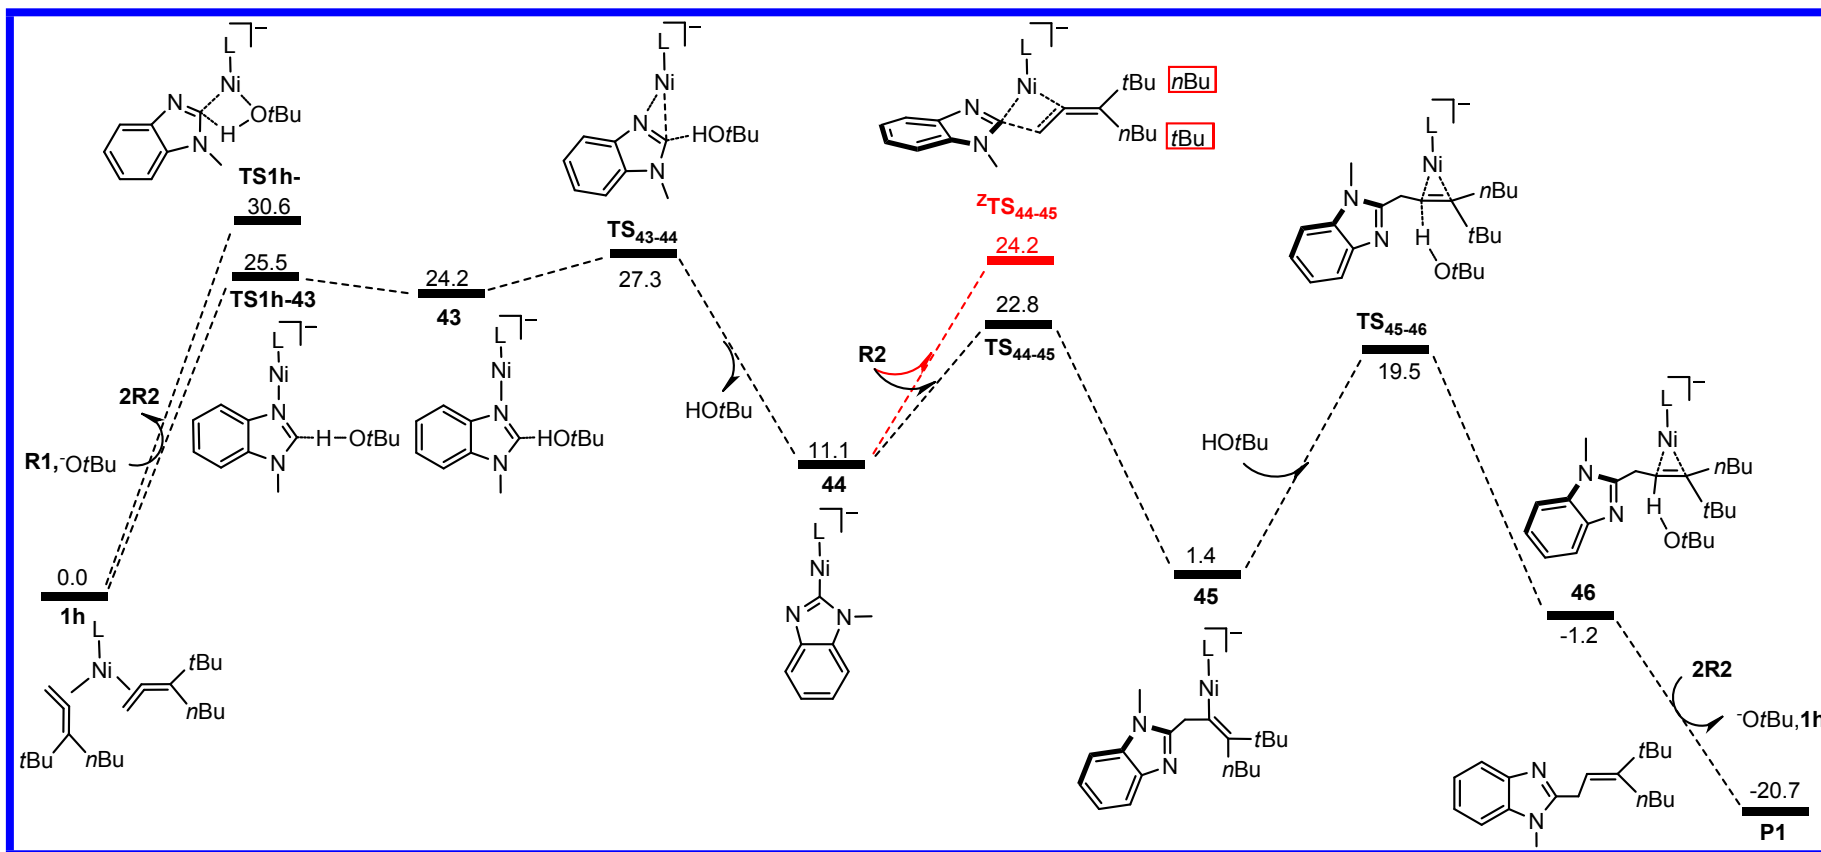

**Fig. S5** Calculated free energy profiles in toluene along the possible pathways for forming **P1** assisted by the  $\text{O}t\text{Bu}$ . The relative free energies are given in kcal/mol. L = IPr

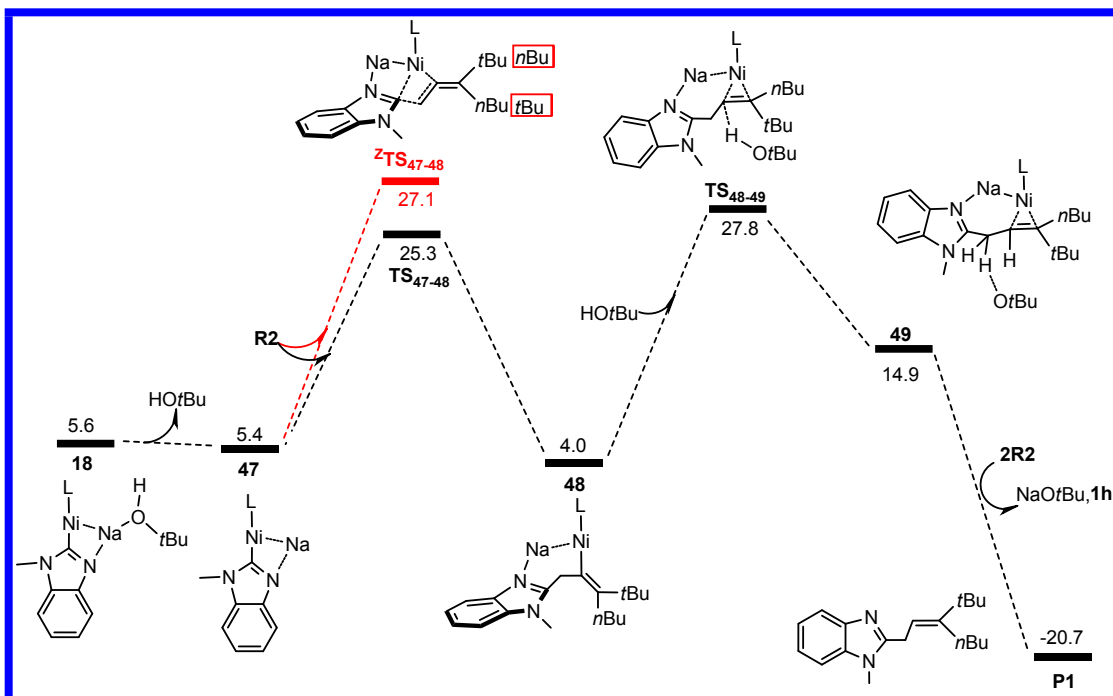

**Fig. S6** Calculated free energy profile in toluene along the possible pathways starting from intermediate **18** in Fig. 2. The relative free energies are given in kcal mol<sup>-1</sup>. L = IPr

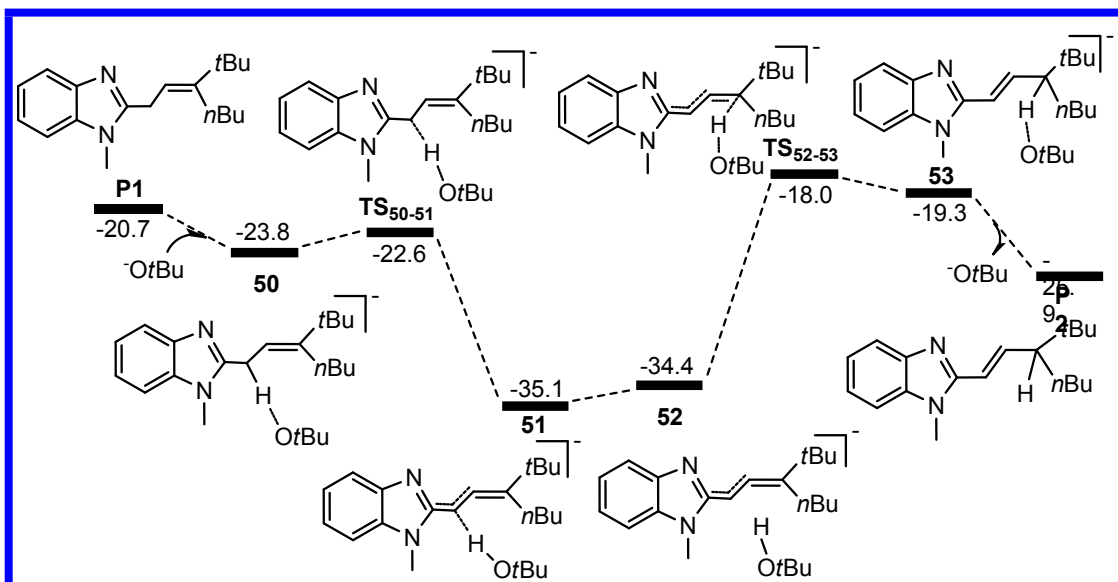

**Fig. S7** Calculated free energy profile in toluene for forming **P2** from **P1** assisted by the <sup>-</sup>OtBu. The relative free energies are given in kcal mol<sup>-1</sup>.



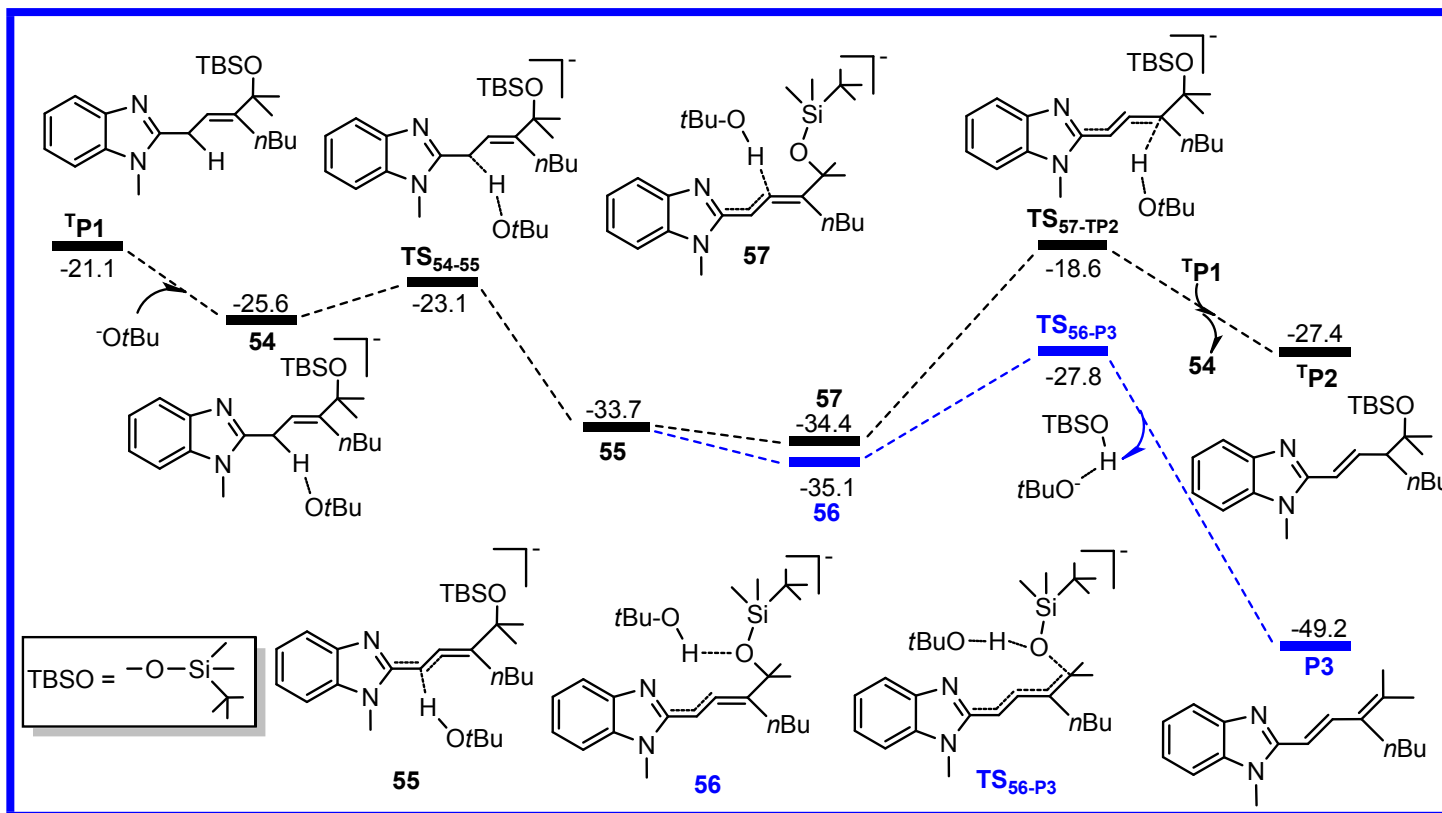

**Fig. S8** Calculated free energy profiles in toluene along the possible pathways for forming **TP2** and **P3**, respectively, from **TP1** assisted by the <sup>-</sup>O*t*Bu. The relative free energies are given in kcal mol<sup>-1</sup>.

**Table S1.** Calculated Gibbs free energies in the gas-phase using B3LYP functional, single-point HF energies in SMD solvent using M06-L functional, and imaginary frequencies for all structures in the present work. The relative energies and the imaginary frequencies are given in Hartree and  $\text{cm}^{-1}$ , respectively.

| Structure                  | Gibbs Free Energy<br>(B3LYP gas-phase<br>optimized calculation) | Solvation HF Energy<br>(M06L single-point<br>calculation) | Imaginary<br>Frequency |
|----------------------------|-----------------------------------------------------------------|-----------------------------------------------------------|------------------------|
| <b>R1</b>                  | -419.056343                                                     | -419.1602652                                              |                        |
| <b>R2</b>                  | -430.917515                                                     | -431.1365088                                              |                        |
| <b>R3</b>                  | -993.274754                                                     | -993.6135699                                              |                        |
| <b>Ni(cod)<sub>2</sub></b> | -794.718981                                                     | -795.0784129                                              |                        |
| <b>IPr</b>                 | -1159.231473                                                    | -1159.9707368                                             |                        |
| <b>NaO<i>t</i>Bu</b>       | -395.277268                                                     | -395.3568238                                              |                        |
| <b>1a</b>                  | -2061.132499                                                    | -2062.2112328                                             |                        |
| <b>1b</b>                  | -2168.305857                                                    | -2169.3326075                                             |                        |
| <b>1c</b>                  | -2180.190551                                                    | -2181.3579154                                             |                        |
| <b>1d</b>                  | -1749.273313                                                    | -1750.1696492                                             |                        |
| <b>1e</b>                  | -2072.981366                                                    | -2074.1991285                                             |                        |
| <b>1f</b>                  | -1761.144469                                                    | -1762.1652356                                             |                        |
| <b>1g</b>                  | -2020.702242                                                    | -2021.7316291                                             |                        |
| <b>1h</b>                  | -2192.037523                                                    | -2193.3459105                                             |                        |
| <b>1i</b>                  | -1749.278226                                                    | -1750.1684496                                             |                        |
| <b>10</b>                  | -1749.273313                                                    | -1750.1696492                                             |                        |
| <b>TS<sub>10-11</sub></b>  | -1749.249987                                                    | -1750.1354702                                             | -690.54                |
| <b>11</b>                  | -1750.1354702                                                   | -1750.1472277                                             |                        |
| <b>12</b>                  | -2180.142213                                                    | -2181.3080767                                             |                        |
| <b>TS<sub>12-13</sub></b>  | -2180.137563                                                    | -2181.3043791                                             | -542.69                |
| <b>13</b>                  | -2180.186095                                                    | -2181.3482816                                             |                        |
| <b>TS<sub>13-P1</sub></b>  | -2180.169434                                                    | -2181.3264876                                             | -306.27                |
| <b>P1</b>                  | -850.001642                                                     | -850.3536755                                              |                        |
| <b>14</b>                  | -2180.188929                                                    | -2181.3376013                                             |                        |
| <b>TS<sub>14-15</sub></b>  | -2180.149777                                                    | -2181.3152718                                             | -989.38                |

|                                       |              |               |          |
|---------------------------------------|--------------|---------------|----------|
| <b>15</b>                             | -2180.198550 | -2181.37967   |          |
| <b>TS<sub>15-16</sub></b>             | -2180.161558 | -2181.3193375 | -228.34  |
| <b>16</b>                             | -2180.188213 | -2181.339702  |          |
| <b><sup>z</sup>14</b>                 | -2180.188720 | -2181.3330026 |          |
| <b><sup>z</sup>TS<sub>14-15</sub></b> | -2180.155171 | -2181.3205875 | -998.30  |
| <b><sup>z</sup>15</b>                 | -2180.194592 | -2181.3778079 |          |
| <b><sup>z</sup>TS<sub>15-16</sub></b> | -2180.156286 | -2181.3163507 | -221.50  |
| <b><sup>z</sup>16</b>                 | -2180.182879 | -2181.3326602 |          |
| <b><sup>z</sup>P1</b>                 | -849.995028  | -850.3452907  |          |
| <b>TS<sub>1h-17</sub></b>             | -2144.572063 | -2145.5476498 | -440.31  |
| <b>17</b>                             | -2144.570684 | -2145.5509018 |          |
| <b>TS<sub>17-18</sub></b>             | -2144.554758 | -2145.5409856 | -73.25   |
| <b>18</b>                             | -2144.583753 | -2145.5708046 |          |
| <b>TS<sub>18-19</sub></b>             | -2575.440233 | -2576.7095025 | -314.30  |
| <b><sup>z</sup>TS<sub>18-19</sub></b> | -2575.440233 | -2576.7067177 | -318.82  |
| <b>19</b>                             | -2575.440233 | -2576.7378025 |          |
| <b>TS<sub>19-20</sub></b>             | -2575.460367 | -2576.7179092 | -1328.38 |
| <b>20</b>                             | -2575.497791 | -2576.7596799 |          |
| <b>21</b>                             | -1245.299405 | -1245.7390956 |          |
| <b>TS<sub>21-22</sub></b>             | -1245.287879 | -1245.729112  | -1258.83 |
| <b>22</b>                             | -1245.294498 | -1245.7429265 |          |
| <b>23</b>                             | -1245.296923 | -1245.7451753 |          |
| <b>TS<sub>23-24</sub></b>             | -1245.281282 | -1245.7250166 | -1393.53 |
| <b>24</b>                             | -1245.303616 | -1245.7439498 |          |
| <b><sup>T</sup>1h</b>                 | -3316.753188 | -3318.3042322 |          |
| <b>TS<sub>1h-25</sub></b>             | -2144.572063 | -2145.5476498 | -440.31  |
| <b>25</b>                             | -2144.570684 | -2145.5509018 |          |
| <b>TS<sub>25-26</sub></b>             | -2144.554758 | -2145.5409856 | -73.25   |
| <b>26</b>                             | -2144.583753 | -2145.5708046 |          |
| <b>TS<sub>26-27</sub></b>             | -3137.801128 | -3139.1924654 | -314.52  |
| <b>27</b>                             | -3137.850362 | -3139.2200103 |          |
| <b>TS<sub>27-TP1</sub></b>            | -3137.819833 | -3139.2001427 | -1326.43 |

|                            |              |               |          |
|----------------------------|--------------|---------------|----------|
| <b>TP1</b>                 | -1412.359739 | -1412.8344986 |          |
| <b>28</b>                  | -1807.659350 | -1808.2210585 |          |
| <b>TS<sub>28-29</sub></b>  | -1807.644791 | -1808.209467  | -1238.67 |
| <b>29</b>                  | -1807.651999 | -1808.2231246 |          |
| <b>30</b>                  | -1807.661950 | -1808.2312804 |          |
| <b>TS<sub>30-TP2</sub></b> | -1807.641927 | -1808.2059069 | -1397.34 |
| <b>31</b>                  | -1807.655467 | -1808.2307038 |          |
| <b>TS<sub>31-P3'</sub></b> | -1807.645249 | -1808.2200586 | -261.50  |
| <b>TP2</b>                 | -809.529738  | -809.8335205  |          |
| <b>P3</b>                  | -1412.364123 | -1412.8358576 |          |
| <b>TS<sub>19-33</sub></b>  | -2575.466870 | -2576.7185291 | -920.50  |
| <b>33</b>                  | -2575.496727 | -2576.7564659 |          |
| <b>34</b>                  | -2575.494658 | -2576.7555754 |          |
| <b>TS<sub>34-35</sub></b>  | -2575.454084 | -2576.7172515 | -711.34  |
| <b>35</b>                  | -2575.485820 | -2576.7384357 |          |
| <b>TS<sub>35-P2</sub></b>  | -2575.471494 | -2576.7294367 | -760.52  |
| <b>36</b>                  | -2575.501446 | -2576.7527193 |          |
| <b>TS<sub>36-37</sub></b>  | -2575.484611 | -2576.7512412 | -1278.87 |
| <b>37</b>                  | -2575.490194 | -2576.7549923 |          |
| <b>38</b>                  | -2575.504591 | -2576.7558383 |          |
| <b>TS<sub>38-39</sub></b>  | -2575.481111 | -2576.7429166 | -1230.13 |
| <b>39</b>                  | -2575.516684 | -2576.7714547 |          |
| <b>40</b>                  | -1269.050843 | -1269.5221002 |          |
| <b>TS<sub>40-41</sub></b>  | -1268.988272 | -1269.4764523 | -77.21   |
| <b>41</b>                  | -1268.991611 | -1269.4794664 |          |
| <b>TS<sub>41-42</sub></b>  | -1268.992264 | -1269.4744339 | -669.62  |
| <b>42</b>                  | -1269.053623 | -1269.5252297 |          |
| <b>TS<sub>1h-</sub></b>    | -1982.229381 | -1983.2665231 | -1206.92 |
| <b>TS<sub>1h-43</sub></b>  | -1982.247816 | -1983.2745565 | -1074.72 |
| <b>43</b>                  | -1982.247706 | -1983.280424  |          |
| <b>TS<sub>43-44</sub></b>  | -1982.239016 | -1983.2756296 | -68.78   |
| <b>44</b>                  | -1748.702521 | -1749.6200966 |          |

|                                       |              |               |          |
|---------------------------------------|--------------|---------------|----------|
| <b>TS<sub>44-45</sub></b>             | -2179.572201 | -2180.7692617 | -292.19  |
| <b><sup>z</sup>TS<sub>44-45</sub></b> | -2179.567063 | -2180.7661592 | -279.77  |
| <b>45</b>                             | -2179.616106 | -2180.7999256 |          |
| <b>TS<sub>45-46</sub></b>             | -2413.147950 | -2414.452774  | -533.23  |
| <b>46</b>                             | -2413.181775 | -2414.4896336 |          |
| <b>47</b>                             | -1911.022220 | -1911.8905602 |          |
| <b>TS<sub>47-48</sub></b>             | -2341.874029 | -2343.026232  | -314.41  |
| <b><sup>z</sup>TS<sub>47-48</sub></b> | -2341.873872 | -2343.024277  | -320.86  |
| <b>48</b>                             | -2341.927280 | -2343.0582915 |          |
| <b>TS<sub>48-49</sub></b>             | -2575.435148 | -2576.7006926 | -1022.07 |
| <b>49</b>                             | -2575.457979 | -2576.723611  |          |
| <b>50</b>                             | -1082.980298 | -1083.4780921 |          |
| <b>TS<sub>50-51</sub></b>             | -1082.977956 | -1083.472082  | -1063.89 |
| <b>51</b>                             | -1082.991733 | -1083.4943482 |          |
| <b>52</b>                             | -1082.989732 | -1083.4932465 |          |
| <b>TS<sub>52-53</sub></b>             | -1082.967128 | -1083.4626036 | -1038.71 |
| <b>53</b>                             | -1082.970863 | -1083.4665548 |          |
| <b>P2</b>                             | -850.004658  | -850.357763   |          |
| <b>54</b>                             | -1645.340294 | -1645.9587777 |          |
| <b>TS<sub>54-55</sub></b>             | -1645.337851 | -1645.9501568 | -1142.44 |
| <b>55</b>                             | -1645.352040 | -1645.9712787 |          |
| <b>56</b>                             | -1645.346433 | -1645.9711231 |          |
| <b>57</b>                             | -1645.349849 | -1645.9712787 |          |
| <b>TS<sub>56-P3</sub></b>             | -1645.339035 | -1645.9599708 | -274.07  |
| <b>TS<sub>57-TP2</sub></b>            | -1645.327574 | -1645.9415882 | -1085.59 |
| <b><sup>T</sup>P2</b>                 | -809.529738  | -809.8335205  |          |
| <b>P3</b>                             | -1412.364123 | -1412.8358576 |          |
|                                       |              |               |          |

Cartesian coordinates for the stationary points given in Table 1.

**Ni(cod)<sub>2</sub>**

|    |             |             |             |
|----|-------------|-------------|-------------|
| C  | 1.36904400  | -1.52773300 | -0.61304700 |
| H  | 0.76216400  | -2.36092200 | -0.96465500 |
| C  | 1.51009300  | -0.45076600 | -1.47299100 |
| C  | 2.23849000  | -1.84126200 | 0.58850700  |
| H  | 1.67924700  | -2.53230300 | 1.23262500  |
| H  | 3.14844400  | -2.38567100 | 0.28532700  |
| C  | 2.62240900  | -0.59230200 | 1.41621100  |
| H  | 2.86898900  | -0.90625800 | 2.43788900  |
| H  | 3.53782300  | -0.14135200 | 1.01903600  |
| C  | 1.51189300  | 0.45092200  | 1.47330900  |
| H  | 0.98228400  | 0.51247800  | 2.42101400  |
| C  | 1.36995300  | 1.52769000  | 0.61402300  |
| H  | 0.76145800  | 2.35980600  | 0.96523300  |
| C  | 2.23801700  | 1.84132000  | -0.58845100 |
| H  | 3.14837300  | 2.38546700  | -0.28604300 |
| H  | 1.67816700  | 2.53270200  | -1.23164200 |
| C  | 2.62075300  | 0.59257800  | -1.41707800 |
| H  | 3.53682100  | 0.14158700  | -1.02141500 |
| H  | 2.86587400  | 0.90700600  | -2.43895700 |
| H  | 0.98158100  | -0.51403300 | -2.42122900 |
| C  | -1.51062500 | -0.45050400 | 1.47343500  |
| H  | -0.98098000 | -0.51296100 | 2.42107600  |
| C  | -1.37010900 | -1.52755900 | 0.61393300  |
| C  | -2.62068900 | 0.59333000  | 1.41731200  |
| H  | -3.53674900 | 0.14283900  | 1.02109700  |
| H  | -2.86611900 | 0.90758700  | 2.43917300  |
| C  | -2.23690900 | 1.84197900  | 0.58906000  |
| H  | -3.14682800 | 2.38683200  | 0.28659900  |
| H  | -1.67671800 | 2.53283700  | 1.23254700  |
| C  | -1.36875200 | 1.52781300  | -0.61323000 |
| H  | -0.76092000 | 2.36017800  | -0.96508600 |
| C  | -1.51116500 | 0.45094700  | -1.47280900 |
| H  | -0.98273400 | 0.51325600  | -2.42114400 |
| C  | -2.62238500 | -0.59170700 | -1.41589900 |
| H  | -2.86864800 | -0.90587000 | -2.43758600 |
| H  | -3.53778300 | -0.14014900 | -1.01934000 |
| C  | -2.23959300 | -1.84069600 | -0.58769100 |
| H  | -1.68077900 | -2.53240500 | -1.23144100 |
| H  | -3.15000000 | -2.38428400 | -0.28442000 |
| H  | -0.76273600 | -2.36055600 | 0.96507100  |
| Ni | -0.00009900 | -0.00107600 | -0.00111700 |

**1a**

|   |             |             |             |
|---|-------------|-------------|-------------|
| C | 0.60890200  | -1.02079900 | 0.23653100  |
| C | 1.78555200  | -2.86961600 | 1.05074600  |
| C | 0.63635200  | -3.34280800 | 0.51558100  |
| N | -0.07784100 | -2.23228800 | 0.03217400  |
| N | 1.77718200  | -1.47232900 | 0.87436300  |
| C | -1.35050800 | -2.38257000 | -0.63356500 |
| C | -2.51173100 | -2.59653800 | 0.14663100  |
| C | -1.38981700 | -2.39816600 | -2.04807900 |
| C | -3.72420400 | -2.82336700 | -0.52389000 |
| C | -2.62894100 | -2.62579000 | -2.66891700 |
| C | -3.78566300 | -2.83663700 | -1.91731500 |
| H | -4.62887000 | -2.99007400 | 0.05081300  |
| H | -2.68418900 | -2.64937400 | -3.75209500 |
| H | -4.73308000 | -3.01489400 | -2.41686800 |
| C | 2.92420000  | -0.67201300 | 1.22935000  |
| C | 4.08874500  | -0.76821000 | 0.43118100  |
| C | 2.88691100  | 0.12540100  | 2.39663800  |
| C | 5.22368900  | -0.04277100 | 0.83021300  |
| C | 4.04376600  | 0.83931600  | 2.74479700  |
| C | 5.20311200  | 0.75741200  | 1.97139800  |
| H | 6.12865100  | -0.10181200 | 0.23431900  |
| H | 4.04312200  | 1.45952300  | 3.63409600  |
| H | 6.08856700  | 1.31509000  | 2.26062000  |
| C | -0.12904900 | -2.24609000 | -2.90008000 |
| H | 0.66548200  | -1.86340800 | -2.25363100 |
| C | 0.32351900  | -3.62053900 | -3.45216200 |
| H | 0.51528700  | -4.33223600 | -2.64095900 |

|    |             |             |             |
|----|-------------|-------------|-------------|
| H  | -0.44308500 | -4.05344800 | -4.10686700 |
| H  | 1.24555900  | -3.51195200 | -4.03616800 |
| C  | -0.30517300 | -1.22598400 | -4.04539900 |
| H  | -1.05722000 | -1.55208600 | -4.77415300 |
| H  | -0.60101400 | -0.24765800 | -3.65370400 |
| H  | 0.64201300  | -1.10205500 | -4.58345100 |
| C  | 4.16099800  | -1.64346300 | -0.82351300 |
| H  | 3.15706000  | -2.02847500 | -1.02568000 |
| C  | 4.60077300  | -0.84923300 | -2.07453600 |
| H  | 4.60968400  | -1.50881900 | -2.95072300 |
| H  | 3.91515600  | -0.02155800 | -2.27595800 |
| H  | 5.61026300  | -0.43706000 | -1.96001600 |
| C  | 5.09580600  | -2.85748300 | -0.60038000 |
| H  | 6.12453200  | -2.53060600 | -0.40552900 |
| H  | 4.77176700  | -3.46516100 | 0.25200800  |
| H  | 5.10849200  | -3.49866000 | -1.48995700 |
| C  | 1.65569600  | 0.15494200  | 3.30242300  |
| H  | 0.79257500  | -0.11577700 | 2.68561800  |
| C  | 1.37779800  | 1.55080700  | 3.89866700  |
| H  | 2.15895400  | 1.86162700  | 4.60211600  |
| H  | 1.30738300  | 2.31066100  | 3.11244200  |
| H  | 0.43431900  | 1.53681100  | 4.45990400  |
| C  | 1.78494900  | -0.90088300 | 4.42877000  |
| H  | 1.91208100  | -1.90714000 | 4.01524300  |
| H  | 2.65042300  | -0.68358200 | 5.06698600  |
| H  | 0.88782500  | -0.90377100 | 5.06066800  |
| C  | -2.46932100 | -2.63075000 | 1.67549100  |
| H  | -1.51899500 | -2.18664600 | 1.98962900  |
| C  | -3.60328200 | -1.80593900 | 2.32378000  |
| H  | -3.62395000 | -0.78491000 | 1.93405800  |
| H  | -4.58652000 | -2.25673100 | 2.14346600  |
| H  | -3.45839600 | -1.76331800 | 3.41035000  |
| C  | -2.51197900 | -4.08774300 | 2.20055900  |
| H  | -3.44504200 | -4.57983400 | 1.89970600  |
| H  | -1.67855100 | -4.68205000 | 1.81224100  |
| H  | -2.45777300 | -4.10272500 | 3.29604600  |
| Ni | -0.01399900 | 0.67948500  | -0.33560900 |
| C  | -3.87322000 | 1.95568500  | 0.95204300  |
| C  | -3.03381900 | 1.29984100  | 0.02227100  |
| C  | -3.51477800 | 0.97751000  | -1.25104700 |
| C  | -4.82651000 | 1.32644300  | -1.55659600 |
| C  | -5.65279300 | 1.98163500  | -0.62056900 |
| C  | -5.19250500 | 2.30763200  | 0.65225300  |
| C  | -1.87395100 | 1.57928300  | 1.81220100  |
| H  | -2.87587700 | 0.46804900  | -1.96316200 |
| H  | -5.22630200 | 1.08895600  | -2.53833000 |
| H  | -6.67143200 | 2.23829300  | -0.89811600 |
| H  | -5.83069900 | 2.81246100  | 1.37165600  |
| H  | -1.07388400 | 1.58593500  | 2.53838700  |
| N  | -1.78141000 | 1.08041300  | 0.59741900  |
| N  | -3.10337600 | 2.12276300  | 2.09261800  |
| C  | -3.50898100 | 2.76298600  | 3.32781200  |
| H  | -3.77639100 | 3.81101600  | 3.15234600  |
| H  | -4.36871100 | 2.24663800  | 3.76930000  |
| H  | -2.67766200 | 2.72781800  | 4.03543600  |
| C  | 1.21443000  | 1.61331100  | -1.56394200 |
| H  | 1.40187700  | 0.99007900  | -2.44527500 |
| C  | -0.06075000 | 2.25785500  | -1.51752000 |
| C  | 2.47929700  | 2.28612800  | -1.05811000 |
| H  | 2.26064200  | 2.89393400  | -0.17497000 |
| H  | 3.20889100  | 1.54166400  | -0.72151600 |
| C  | 3.18412200  | 3.14609100  | -2.14467900 |
| H  | 4.03488500  | 3.67689900  | -1.68345500 |
| H  | 3.64202000  | 2.45701400  | -2.86983200 |
| C  | 2.34518800  | 4.12934800  | -2.93664000 |
| H  | 2.67564300  | 4.27792100  | -3.96625500 |
| C  | 1.27389600  | 4.82509600  | -2.53584500 |
| H  | 0.78872100  | 5.47112500  | -3.26905900 |
| C  | 0.65561600  | 4.78913700  | -1.16259800 |
| H  | 0.13829500  | 5.74027100  | -0.97360900 |
| H  | 1.44994800  | 4.73262800  | -0.41158400 |
| C  | -0.36553100 | 3.63149700  | -0.91350000 |
| H  | -1.33983300 | 3.94913600  | -1.30843000 |
| H  | -0.50205800 | 3.57606900  | 0.17778100  |
| H  | -0.73230000 | 2.01663900  | -2.34815800 |
| H  | 0.26107000  | -4.34699700 | 0.42464100  |
| H  | 2.60585600  | -3.37869900 | 1.52594300  |

**1b**

|    |             |             |             |
|----|-------------|-------------|-------------|
| C  | -1.56274300 | 0.00111800  | 0.00019100  |
| C  | -3.82120000 | -0.63248000 | -0.23260600 |
| C  | -3.82006600 | 0.63826700  | 0.23433100  |
| N  | -2.47403600 | 1.03179900  | 0.37489000  |
| N  | -2.47586700 | -1.02816200 | -0.37386000 |
| C  | -2.06943500 | 2.31404300  | 0.87690600  |
| C  | -1.95694100 | 2.50272100  | 2.27389300  |
| C  | -1.82105600 | 3.37009000  | -0.03520300 |
| C  | -1.57885100 | 3.77095200  | 2.74626100  |
| C  | -1.44509100 | 4.61874600  | 0.48473800  |
| C  | -1.32112200 | 4.81894800  | 1.86238400  |
| H  | -1.49290400 | 3.93848800  | 3.81575400  |
| H  | -1.25049300 | 5.44379800  | -0.19179100 |
| H  | -1.03277100 | 5.79409900  | 2.24448700  |
| C  | -2.07355100 | -2.31100900 | -0.87619500 |
| C  | -1.96221800 | -2.49975100 | -2.27326300 |
| C  | -1.82623400 | -3.36751600 | 0.03568100  |
| C  | -1.58643200 | -3.76854300 | -2.74596500 |
| C  | -1.45256800 | -4.61671800 | -0.48459700 |
| C  | -1.32979800 | -4.81701100 | -1.86233700 |
| H  | -1.50137400 | -3.93611300 | -3.81552200 |
| H  | -1.25879900 | -5.44210800 | 0.19175400  |
| H  | -1.04321500 | -5.79258200 | -2.24469900 |
| C  | -2.00955500 | 3.16812600  | -1.53951400 |
| H  | -1.84129000 | 2.10435700  | -1.74060400 |
| C  | -3.45956800 | 3.51652100  | -1.96220500 |
| H  | -4.19188200 | 2.90467300  | -1.42630000 |
| H  | -3.67975200 | 4.57221400  | -1.75782900 |
| H  | -3.59540700 | 3.34298800  | -3.03710200 |
| C  | -1.00620200 | 3.96379500  | -2.39991600 |
| H  | -1.18239700 | 5.04545100  | -2.34189500 |
| H  | 0.02693500  | 3.76673600  | -2.09821200 |
| H  | -1.11410700 | 3.67498800  | -3.45231100 |
| C  | -2.27435100 | -1.37820800 | -3.26405500 |
| H  | -2.45591200 | -0.46857000 | -2.68442200 |
| C  | -1.08892900 | -1.08520600 | -4.20966100 |
| H  | -1.34360900 | -0.26347600 | -4.89041000 |
| H  | -0.20592300 | -0.78831100 | -3.63550600 |
| H  | -0.83204500 | -1.95817200 | -4.82309300 |
| C  | -3.55770700 | -1.69036600 | -4.07091700 |
| H  | -3.43586800 | -2.59692700 | -4.67706000 |
| H  | -4.41558800 | -1.84384000 | -3.40651000 |
| H  | -3.79530800 | -0.86084300 | -4.74823500 |
| C  | -2.01322200 | -3.16528600 | 1.54015500  |
| H  | -1.84213000 | -2.10195800 | 1.74122600  |
| C  | -1.01132700 | -3.96364700 | 2.39976600  |
| H  | -1.19076000 | -5.04479800 | 2.34214200  |
| H  | 0.02210400  | -3.76968800 | 2.09705700  |
| H  | -1.11738200 | -3.67430600 | 3.45220000  |
| C  | -3.46378100 | -3.51005000 | 1.96393500  |
| H  | -4.19497600 | -2.89620400 | 1.42880600  |
| H  | -3.68684800 | -4.56513700 | 1.75954100  |
| H  | -3.59827900 | -3.33640400 | 3.03898600  |
| C  | -2.27037400 | 1.38175800  | 3.26494000  |
| H  | -2.45370100 | 0.47237900  | 2.68545700  |
| C  | -1.08499400 | 1.08688900  | 4.20999500  |
| H  | -0.20275900 | 0.78845400  | 3.63545200  |
| H  | -0.82634000 | 1.95947900  | 4.82321700  |
| H  | -1.34071600 | 0.26565600  | 4.89095200  |
| C  | -3.55282300 | 1.69610200  | 4.07239600  |
| H  | -3.42922200 | 2.60260600  | 4.67826600  |
| H  | -4.41079800 | 1.85078600  | 3.40839200  |
| H  | -3.79139300 | 0.86710200  | 4.75001400  |
| Ni | 0.23921400  | -0.00016800 | -0.00061700 |
| C  | 3.48642400  | 1.55517400  | -2.28685500 |
| C  | 2.42633900  | 1.67350300  | -1.35678500 |
| C  | 2.26341700  | 2.85586700  | -0.62551700 |
| C  | 3.17744300  | 3.88536000  | -0.83964400 |
| C  | 4.23289000  | 3.75130500  | -1.76439500 |
| C  | 4.40516800  | 2.58557100  | -2.50716700 |
| C  | 2.26193700  | -0.28431500 | -2.23142900 |
| H  | 1.43354900  | 2.95789700  | 0.06701600  |
| H  | 3.07149900  | 4.81611500  | -0.28924500 |
| H  | 4.92432800  | 4.57749000  | -1.90618000 |
| H  | 5.21577300  | 2.48900200  | -3.22383000 |
| H  | 1.93875300  | -1.28515100 | -2.48065000 |
| N  | 1.67633400  | 0.49623900  | -1.34525400 |
| N  | 3.35815600  | 0.29122400  | -2.83499000 |

|   |             |             |             |
|---|-------------|-------------|-------------|
| C | 4.20060700  | -0.30414500 | -3.85179200 |
| H | 4.17042900  | 0.28264700  | -4.77713900 |
| H | 5.23912900  | -0.36965100 | -3.50778200 |
| H | 3.83943200  | -1.31262500 | -4.06527500 |
| C | 3.48428500  | -1.56045000 | 2.28614100  |
| C | 2.42423800  | -1.67717100 | 1.35582900  |
| C | 2.25953500  | -2.85937800 | 0.62470200  |
| C | 3.17179400  | -3.89034900 | 0.83923200  |
| C | 4.22723500  | -3.75789500 | 1.76422900  |
| C | 4.40126900  | -2.59232900 | 2.50685200  |
| C | 2.26289100  | 0.28106900  | 2.23005200  |
| H | 1.42968000  | -2.96013200 | -0.06803500 |
| H | 3.06446400  | -4.82101200 | 0.28894700  |
| H | 4.91726800  | -4.58520300 | 1.90631000  |
| H | 5.21187600  | -2.49696900 | 3.22367500  |
| H | 1.94133300  | 1.28251100  | 2.47895100  |
| N | 1.67619300  | -0.49869100 | 1.34392500  |
| N | 3.35794600  | -0.29620500 | 2.83405700  |
| C | 4.20152200  | 0.29816300  | 3.85051600  |
| H | 4.17162500  | -0.28911600 | 4.77555400  |
| H | 5.23985300  | 0.36323500  | 3.50582900  |
| H | 3.84106700  | 1.30672700  | 4.06481800  |
| H | -4.63652400 | 1.29449500  | 0.48414800  |
| H | -4.63882900 | -1.28738200 | -0.48207100 |

**1c**

|   |             |             |             |
|---|-------------|-------------|-------------|
| C | 1.48946000  | -0.67368400 | 0.21908600  |
| C | 3.58454200  | -1.31463400 | 1.00867500  |
| C | 3.02752100  | -2.40945800 | 0.43904300  |
| N | 1.75849600  | -2.02256300 | -0.02909200 |
| N | 2.66039900  | -0.26349700 | 0.86709900  |
| C | 0.89173100  | -2.95168600 | -0.71780600 |
| C | 0.15466300  | -3.88979800 | 0.04305000  |
| C | 0.86743100  | -2.95206000 | -2.13178500 |
| C | -0.61634400 | -4.83740100 | -0.64823200 |
| C | 0.07564600  | -3.91864500 | -2.77358900 |
| C | -0.65845400 | -4.85291200 | -2.04263400 |
| H | -1.18995500 | -5.56898200 | -0.08949100 |
| H | 0.04385200  | -3.94333200 | -3.85768900 |
| H | -1.26088800 | -5.59416700 | -2.55871600 |
| C | 2.97389200  | 1.08094000  | 1.30057600  |
| C | 3.85589900  | 1.86099800  | 0.51538400  |
| C | 2.45128800  | 1.55327200  | 2.52673500  |
| C | 4.20184600  | 3.13732000  | 0.98827500  |
| C | 2.82437600  | 2.83820500  | 2.95026200  |
| C | 3.69042800  | 3.62501900  | 2.19000300  |
| H | 4.87506800  | 3.75606400  | 0.40510300  |
| H | 2.43805500  | 3.22717200  | 3.88548500  |
| H | 3.96685400  | 4.61634600  | 2.53557600  |
| C | 1.70829900  | -1.98620200 | -2.96680600 |
| H | 2.10477200  | -1.21928700 | -2.29575300 |
| C | 2.90829900  | -2.72241900 | -3.61107500 |
| H | 3.53667400  | -3.20171600 | -2.85151200 |
| H | 2.56767800  | -3.49977000 | -4.30629500 |
| H | 3.53087200  | -2.01590600 | -4.17313600 |
| C | 0.87225800  | -1.25134600 | -4.03774200 |
| H | 0.45795600  | -1.94301500 | -4.78148200 |
| H | 0.04720200  | -0.69879900 | -3.57684300 |
| H | 1.50147200  | -0.53022700 | -4.57247300 |
| C | 4.46628600  | 1.34927900  | -0.79207100 |
| H | 3.89914700  | 0.46560500  | -1.10192100 |
| C | 4.37486800  | 2.37762100  | -1.94220300 |
| H | 4.74035000  | 1.92556400  | -2.87206800 |
| H | 3.34435600  | 2.70458100  | -2.10289000 |
| H | 4.99133100  | 3.26287700  | -1.74568900 |
| C | 5.94172000  | 0.92388100  | -0.58328800 |
| H | 6.55260300  | 1.78265500  | -0.27888400 |
| H | 6.03842100  | 0.15350500  | 0.18911700  |
| H | 6.35942300  | 0.52464600  | -1.51538200 |
| C | 1.55997600  | 0.67899100  | 3.40947500  |
| H | 1.07706200  | -0.05855000 | 2.75985000  |
| C | 0.44085300  | 1.47645200  | 4.11275500  |
| H | 0.83762200  | 2.16528600  | 4.86733800  |
| H | -0.13966400 | 2.06513800  | 3.39346500  |
| H | -0.23563300 | 0.78808200  | 4.63562400  |
| C | 2.40871000  | -0.09198600 | 4.45152200  |
| H | 3.16119500  | -0.72134200 | 3.96451100  |
| H | 2.92957600  | 0.60556900  | 5.11906800  |

|    |             |             |             |
|----|-------------|-------------|-------------|
| H  | 1.77046600  | -0.73921200 | 5.06593900  |
| C  | 0.21136400  | -3.92179800 | 1.57177000  |
| H  | 0.65626700  | -2.97914100 | 1.90747800  |
| C  | -1.18809500 | -4.02641300 | 2.21762300  |
| H  | -1.85463600 | -3.24195600 | 1.84910700  |
| H  | -1.65939400 | -4.99422400 | 2.00945900  |
| H  | -1.10373500 | -3.93147300 | 3.30720700  |
| C  | 1.11323500  | -5.07766200 | 2.07199700  |
| H  | 0.71026400  | -6.04800100 | 1.75699600  |
| H  | 2.13218200  | -4.99402400 | 1.67977500  |
| H  | 1.17005600  | -5.07316800 | 3.16733600  |
| Ni | -0.01710600 | 0.40034900  | -0.32663500 |
| C  | -3.70525000 | -1.34664000 | 0.85816300  |
| C  | -2.65138900 | -1.14657400 | -0.06257100 |
| C  | -2.75327700 | -1.64400300 | -1.36596700 |
| C  | -3.90958800 | -2.33850000 | -1.70500000 |
| C  | -4.95071100 | -2.53793600 | -0.77503500 |
| C  | -4.86916500 | -2.04488400 | 0.52427400  |
| C  | -2.06068300 | -0.19151800 | 1.77354500  |
| H  | -1.94996100 | -1.48306000 | -2.07555800 |
| H  | -4.01619500 | -2.73627700 | -2.71008800 |
| H  | -5.83872400 | -3.08459600 | -1.07996900 |
| H  | -5.67518000 | -2.19320600 | 1.23688300  |
| H  | -1.52091000 | 0.36935900  | 2.52208800  |
| N  | -1.63330000 | -0.41539500 | 0.54960800  |
| N  | -3.29896100 | -0.72190200 | 2.02766500  |
| C  | -4.04209300 | -0.63577400 | 3.26975000  |
| H  | -4.99853600 | -0.12628600 | 3.11195900  |
| H  | -4.23250900 | -1.63440600 | 3.67843000  |
| H  | -3.45757000 | -0.06442600 | 3.99402600  |
| H  | 3.40103800  | -3.41067400 | 0.31524900  |
| H  | 4.53677900  | -1.17539000 | 1.48934000  |
| C  | -0.66749000 | 1.89725100  | -1.29813700 |
| C  | 0.73559400  | 1.75305400  | -1.46902300 |
| C  | -1.69459500 | 2.71190700  | -1.58764400 |
| C  | -1.49249400 | 3.98320500  | -2.47143500 |
| C  | -2.82075200 | 4.67121200  | -2.85473300 |
| H  | -3.38867300 | 5.00488400  | -1.97932400 |
| H  | -2.61317000 | 5.55848300  | -3.46676700 |
| H  | -3.46634800 | 4.01021100  | -3.44519000 |
| C  | -0.78015600 | 3.61139800  | -3.79077100 |
| H  | 0.19283400  | 3.15244300  | -3.59997800 |
| H  | -1.38120600 | 2.89972600  | -4.37002000 |
| H  | -0.62196400 | 4.50484100  | -4.41084600 |
| C  | -0.62331400 | 5.00940400  | -1.70710000 |
| H  | -0.42898500 | 5.89937800  | -2.32282300 |
| H  | -1.12040200 | 5.33937400  | -0.78708000 |
| H  | 0.33926000  | 4.56960700  | -1.42865700 |
| C  | -3.06559200 | 2.45164500  | -0.97505000 |
| H  | -3.87277900 | 2.69091000  | -1.68010200 |
| H  | -3.15211300 | 1.38201500  | -0.76466900 |
| C  | -3.32245300 | 3.21835400  | 0.34027400  |
| H  | -3.20625800 | 4.29971400  | 0.18020300  |
| H  | -2.54178700 | 2.93474400  | 1.06083900  |
| C  | -4.70794800 | 2.95169200  | 0.94455000  |
| H  | -5.48259400 | 3.25234200  | 0.22455900  |
| H  | -4.83746900 | 1.86838900  | 1.08782500  |
| C  | -4.94253900 | 3.67813400  | 2.27408500  |
| H  | -4.85226700 | 4.76455100  | 2.15140200  |
| H  | -5.94074500 | 3.47223200  | 2.68007700  |
| H  | -4.20489100 | 3.37421800  | 3.02849600  |
| H  | 1.14852300  | 1.37106100  | -2.40855900 |
| H  | 1.41166300  | 2.44498000  | -0.95818700 |

## 1d

|   |             |             |             |
|---|-------------|-------------|-------------|
| C | -0.22602800 | -0.90528900 | 0.27647400  |
| C | 0.18361300  | -2.68906300 | 1.70467900  |
| C | -1.15984000 | -2.49649100 | 1.68533700  |
| N | -1.40496400 | -1.41725000 | 0.82039300  |
| N | 0.74717400  | -1.72279400 | 0.85244900  |
| C | -2.72499300 | -0.90723000 | 0.52890400  |
| C | -3.26375700 | 0.10892000  | 1.35060000  |
| C | -3.44446200 | -1.45278600 | -0.55869000 |
| C | -4.55879300 | 0.56763600  | 1.06200000  |
| C | -4.73377500 | -0.95631700 | -0.80701800 |
| C | -5.28854400 | 0.04173600  | -0.00486300 |
| H | -4.99515300 | 1.34874800  | 1.67593100  |
| H | -5.30502400 | -1.35388500 | -1.63949900 |

|    |             |             |              |
|----|-------------|-------------|--------------|
| H  | -6.28757400 | 0.41215100  | -0.21338200  |
| C  | 2.16612700  | -1.58132800 | 0.63416500   |
| C  | 2.76456600  | -2.24552400 | -0.46008800  |
| C  | 2.91801700  | -0.79436700 | 1.53606800   |
| C  | 4.14821900  | -2.09086200 | -0.644454700 |
| C  | 4.29853300  | -0.67368900 | 1.30953200   |
| C  | 4.90959400  | -1.31156400 | 0.22830500   |
| H  | 4.63280600  | -2.59049200 | -1.47720900  |
| H  | 4.89885800  | -0.07588600 | 1.98797800   |
| H  | 5.97903900  | -1.20831800 | 0.07091800   |
| C  | -2.86050200 | -2.53484000 | -1.46636500  |
| H  | -1.87134700 | -2.79998000 | -1.07963700  |
| C  | -3.72315300 | -3.81831800 | -1.45655000  |
| H  | -3.84013500 | -4.21253700 | -0.44039300  |
| H  | -4.72485100 | -3.63145300 | -1.86185400  |
| H  | -3.25430900 | -4.59482600 | -2.07272400  |
| C  | -2.66221500 | -2.00689000 | -2.90672700  |
| H  | -3.61948500 | -1.72564300 | -3.36245000  |
| H  | -2.00873300 | -1.12766500 | -2.91156900  |
| H  | -2.20496600 | -2.78101200 | -3.53521900  |
| C  | 1.96479200  | -3.13009100 | -1.41647300  |
| H  | 0.91239600  | -3.07536000 | -1.12168900  |
| C  | 2.05277400  | -2.63012200 | -2.87631400  |
| H  | 1.45414400  | -3.27334700 | -3.53231800  |
| H  | 1.66700800  | -1.60892000 | -2.95989800  |
| H  | 3.08502000  | -2.64378200 | -3.24697200  |
| C  | 2.40700100  | -4.60911600 | -1.31015000  |
| H  | 3.45361100  | -4.73480900 | -1.61317600  |
| H  | 2.30784700  | -4.98162900 | -0.28414500  |
| H  | 1.79066400  | -5.23822500 | -1.96335700  |
| C  | 2.27894600  | -0.08996900 | -2.73339900  |
| H  | 1.21048400  | -0.32588100 | 2.73003600   |
| C  | 2.40255300  | 1.44724900  | 2.62699700   |
| H  | 3.45312700  | 1.76411900  | 2.62007600   |
| H  | 1.92178900  | 1.81220300  | 1.71367500   |
| H  | 1.91565600  | 1.92672000  | 3.48476400   |
| C  | 2.86392200  | -0.60326300 | 4.07022500   |
| H  | 2.74220600  | -1.68822200 | 4.16757300   |
| H  | 3.93383300  | -0.37735100 | 4.15287400   |
| H  | 2.35504100  | -0.12518900 | 4.91565600   |
| C  | -2.48641500 | 0.71515500  | 2.51832300   |
| H  | -1.49680500 | 0.24817000  | 2.54063500   |
| C  | -2.27021500 | 2.23421200  | 2.32651800   |
| H  | -1.75582400 | 2.44211100  | 1.38239800   |
| H  | -3.22359600 | 2.77644600  | 2.32263100   |
| H  | -1.66131700 | 2.63542800  | 3.14581300   |
| C  | -3.17472400 | 0.41803300  | 3.87153100   |
| H  | -4.17206000 | 0.87162500  | 3.91842500   |
| H  | -3.28855800 | -0.66025200 | 4.03316600   |
| H  | -2.58154100 | 0.82691200  | 4.69829400   |
| Ni | -0.07475900 | 0.47039100  | -0.93916600  |
| C  | 1.19125000  | 3.61353400  | -1.18899300  |
| C  | -0.03545600 | 3.13419700  | -1.71735600  |
| C  | -1.16811500 | 3.95125300  | -1.70290700  |
| C  | -1.05476400 | 5.22972100  | -1.15018100  |
| C  | 0.16363500  | 5.69052600  | -0.62517600  |
| C  | 1.30834600  | 4.88801500  | -0.63179600  |
| C  | 1.42126700  | 1.50200700  | -1.90631500  |
| H  | -2.10619800 | 3.59183500  | -2.11581200  |
| H  | -1.92413200 | 5.88137600  | -1.12781800  |
| H  | 0.22049400  | 6.69175800  | -0.20626100  |
| H  | 2.24820800  | 5.24771200  | -0.22223900  |
| H  | 2.00693400  | 0.77514100  | -2.46253100  |
| N  | 0.13155600  | 1.83926000  | -2.22324600  |
| N  | 2.10913100  | 2.59455000  | -1.35757500  |
| C  | 3.50643200  | 2.63125500  | -0.99512900  |
| H  | 4.02125900  | 3.45175000  | -1.51119400  |
| H  | 3.63795900  | 2.76092700  | 0.08624300   |
| H  | 3.97138800  | 1.68506600  | -1.28170900  |
| H  | -1.95601900 | -3.01404400 | 2.19185500   |
| H  | 0.78780400  | -3.40678600 | 2.23208500   |

## 1e

|   |             |            |            |
|---|-------------|------------|------------|
| C | -1.24974100 | 0.80490900 | 0.28900900 |
| C | -2.12755800 | 2.58686600 | 1.49783100 |
| C | -3.17489300 | 1.93770100 | 0.93866700 |
| N | -2.64426800 | 0.85301700 | 0.21726300 |
| N | -0.96292100 | 1.90823700 | 1.09504200 |



|    |             |             |             |
|----|-------------|-------------|-------------|
| C  | -3.50938300 | -0.09329200 | -0.45662900 |
| C  | -3.67666000 | -0.00711700 | -1.85914500 |
| C  | -4.22390000 | -1.03162500 | 0.32605900  |
| C  | -4.55542300 | -0.91547900 | -2.47031700 |
| C  | -5.09671900 | -1.91050100 | -0.33586900 |
| C  | -5.25591200 | -1.86090200 | -1.72004000 |
| H  | -4.69871300 | -0.87769900 | -3.54387100 |
| H  | -5.65409200 | -2.64118000 | 0.24018100  |
| H  | -5.93099100 | -2.55276500 | -2.21404300 |
| C  | 0.35405300  | 2.37910400  | 1.47283600  |
| C  | 1.07710700  | 1.68183500  | 2.47138000  |
| C  | 0.84439600  | 3.57061200  | 0.88656600  |
| C  | 2.33509100  | 2.18402800  | 2.83756100  |
| C  | 2.10595900  | 4.03261200  | 1.29788000  |
| C  | 2.84946700  | 3.34368100  | 2.25412700  |
| H  | 2.91669500  | 1.66863800  | 3.59222100  |
| H  | 2.50620600  | 4.94293500  | 0.86494600  |
| H  | 3.82409300  | 3.71515800  | 2.55528800  |
| C  | -4.11326700 | -1.08620900 | 1.85200700  |
| H  | -3.25118400 | -0.48061900 | 2.15027900  |
| C  | -5.37374500 | -0.48137100 | 2.51972900  |
| H  | -5.54475800 | 0.55341700  | 2.20442700  |
| H  | -6.26709300 | -1.06186600 | 2.25927200  |
| H  | -5.26937600 | -0.49125800 | 3.61123400  |
| C  | -3.87283800 | -2.51659100 | 2.38195900  |
| H  | -4.73192200 | -3.17036600 | 2.19123300  |
| H  | -2.99280700 | -2.96816400 | 1.91676500  |
| H  | -3.71330000 | -2.49178100 | 3.46646600  |
| C  | 0.48044300  | 0.47057000  | 3.19208400  |
| H  | -0.11817700 | -0.08387100 | 2.46175900  |
| C  | 1.53788000  | -0.50298500 | 3.74946000  |
| H  | 1.04431400  | -1.40954000 | 4.11706700  |
| H  | 2.25933000  | -0.79709700 | 2.98131400  |
| H  | 2.08871300  | -0.06904600 | 4.59294400  |
| C  | -0.46286300 | 0.93005700  | 4.33453300  |
| H  | 0.09508500  | 1.50173500  | 5.08656500  |
| H  | -1.27619900 | 1.56075400  | 3.96151900  |
| H  | -0.90889500 | 0.05993400  | 4.83168500  |
| C  | 0.03254600  | 4.40390800  | -0.11077400 |
| H  | -0.81275300 | 3.79774300  | -0.45341600 |
| C  | 0.84036100  | 4.81226100  | -1.36265000 |
| H  | 1.67458100  | 5.47675100  | -1.10944400 |
| H  | 1.24837900  | 3.93976200  | -1.87929700 |
| H  | 0.19231700  | 5.35208600  | -2.06339200 |
| C  | -0.53771200 | 5.67296200  | 0.57314400  |
| H  | -1.14662200 | 5.42900100  | 1.45004700  |
| H  | 0.27501800  | 6.32982400  | 0.90601000  |
| H  | -1.16312900 | 6.23691600  | -0.12914600 |
| C  | -2.99664600 | 1.08467300  | -2.68659900 |
| H  | -2.08290300 | 1.37712800  | -2.16209800 |
| C  | -2.57979800 | 0.61337200  | -4.09535600 |
| H  | -1.98252100 | -0.30333800 | -4.04891700 |
| H  | -3.44697000 | 0.42531000  | -4.73967300 |
| H  | -1.97709500 | 1.38901200  | -4.58155500 |
| C  | -3.90954600 | 2.33362500  | -2.78557800 |
| H  | -4.84987800 | 2.08826300  | -3.29454100 |
| H  | -4.15421700 | 2.73061500  | -1.79430400 |
| H  | -3.41075800 | 3.12669300  | -3.35584200 |
| Ni | -0.01426000 | -0.39671700 | -0.68185500 |
| C  | 1.68136800  | 0.23345200  | -1.48799400 |
| C  | 0.63424600  | 0.84680500  | -2.13962600 |
| H  | 0.41764600  | 1.90319700  | -1.98669500 |
| H  | 0.22512200  | 0.42555400  | -3.06004800 |
| C  | 2.97917900  | 0.13310000  | -1.19021600 |
| C  | 4.06271500  | 0.85116800  | -2.04597400 |
| C  | 5.13523700  | 1.49523800  | -1.13483600 |
| H  | 5.68208600  | 0.76011700  | -0.53748400 |
| H  | 5.87206600  | 2.03174500  | -1.74594900 |
| H  | 4.67936300  | 2.21687300  | -0.44664200 |
| C  | 3.47484000  | 1.98292100  | -2.90989300 |
| H  | 2.72319100  | 1.61460700  | -3.61316700 |
| H  | 3.00794900  | 2.75207600  | -2.28666700 |
| H  | 4.27645000  | 2.45804400  | -3.48940000 |
| C  | 4.73407200  | -0.15834000 | -3.01102200 |
| H  | 5.50491900  | 0.34286700  | -3.61210500 |
| H  | 5.21088500  | -0.98896100 | -2.48510500 |
| H  | 3.99148400  | -0.58052400 | -3.69788800 |
| C  | 3.40828700  | -0.62845500 | 0.06438200  |
| H  | 3.76296300  | 0.10309300  | 0.80700900  |
| H  | 2.50121400  | -1.06720800 | 0.49615900  |

|   |             |             |             |
|---|-------------|-------------|-------------|
| C | 4.47438600  | -1.73947200 | -0.03988900 |
| H | 5.43082300  | -1.33089800 | -0.38751500 |
| H | 4.17071100  | -2.48350600 | -0.78677500 |
| C | 4.71560300  | -2.43830900 | 1.30629700  |
| H | 5.01500800  | -1.68841900 | 2.05325000  |
| H | 3.77146200  | -2.86801000 | 1.67058500  |
| C | 5.77944600  | -3.53919800 | 1.23422000  |
| H | 6.74518300  | -3.13576100 | 0.90460400  |
| H | 5.93259900  | -4.01464700 | 2.21016800  |
| H | 5.48905600  | -4.32290100 | 0.52381400  |
| H | -2.09099400 | 3.45412200  | 2.13236200  |
| H | -4.23208200 | 2.13038300  | 0.98309800  |
| C | -0.56674600 | -2.30963600 | -0.12303200 |
| H | -1.65591500 | -2.27302600 | -0.15253200 |
| C | 0.09060300  | -2.30842500 | -1.37173700 |
| C | -0.03343400 | -2.91828000 | 1.16097200  |
| H | 1.04772700  | -2.78048600 | 1.24397400  |
| H | -0.46046000 | -2.37717800 | 2.01686500  |
| C | -0.40198300 | -4.41160700 | 1.35798700  |
| H | 0.04456400  | -4.76223700 | 2.30417000  |
| H | -1.48739400 | -4.47403500 | 1.52217400  |
| C | -0.07025200 | -5.39216100 | 0.25678100  |
| H | -0.69708500 | -6.28572200 | 0.26085800  |
| C | 0.86473700  | -5.31725600 | -0.69736200 |
| H | 0.90882400  | -6.14046700 | -1.41207300 |
| C | 1.86246600  | -4.20925800 | -0.92702700 |
| H | 2.74604700  | -4.63426200 | -1.42288500 |
| H | 2.22245300  | -3.81278200 | 0.02511200  |
| C | 1.34395300  | -3.05944100 | -1.82306000 |
| H | 1.11295100  | -3.49655600 | -2.80561200 |
| H | 2.17082000  | -2.36273300 | -2.00184100 |
| H | -0.58693900 | -2.13344500 | -2.21478700 |

## 1f

|   |             |             |             |
|---|-------------|-------------|-------------|
| C | 1.08797800  | -0.76829400 | -0.03152500 |
| C | 1.84583700  | -2.94901600 | -0.19590500 |
| C | 2.93611700  | -2.16041100 | -0.01575800 |
| N | 2.47023400  | -0.83859400 | 0.08326000  |
| N | 0.72770500  | -2.09776500 | -0.20378100 |
| C | 3.34494400  | 0.29823100  | 0.26859300  |
| C | 3.87470800  | 0.94393600  | -0.87109400 |
| C | 3.66365300  | 0.70844200  | 1.58201200  |
| C | 4.74596900  | 2.02505100  | -0.66451500 |
| C | 4.53791900  | 1.79654800  | 1.73349600  |
| C | 5.07533000  | 2.44933500  | 0.62350800  |
| H | 5.16826700  | 2.53926700  | -1.52164400 |
| H | 4.79827700  | 2.13472800  | 2.73115100  |
| H | 5.74967100  | 3.28877200  | 0.76199000  |
| C | -0.62776600 | -2.57007700 | -0.37471600 |
| C | -1.36609500 | -2.95206700 | 0.76801800  |
| C | -1.15918700 | -2.66073200 | -1.68112800 |
| C | -2.66764700 | -3.44048300 | 0.57193400  |
| C | -2.46607100 | -3.15430000 | -1.82167000 |
| C | -3.21301900 | -3.54359200 | -0.70894700 |
| H | -3.25942400 | -3.73880300 | 1.43080900  |
| H | -2.90144000 | -3.23272400 | -2.81232200 |
| H | -4.22087800 | -3.92514500 | -0.83942800 |
| C | 3.09344900  | 0.01640500  | 2.81996200  |
| H | 2.44739000  | -0.80057900 | 2.48328800  |
| C | 4.21272700  | -0.60278100 | 3.68953000  |
| H | 4.81250300  | -1.31948200 | 3.11655300  |
| H | 4.89033800  | 0.16767500  | 4.07618000  |
| H | 3.77956400  | -1.12908100 | 4.54844700  |
| C | 2.21129700  | 0.97924100  | 3.64805800  |
| H | 2.79300400  | 1.82717100  | 4.02918100  |
| H | 1.39100200  | 1.37108500  | 3.03787700  |
| H | 1.78076700  | 0.45341300  | 4.50882400  |
| C | -0.80385200 | -2.83061200 | 2.18409600  |
| H | 0.23931300  | -2.50758700 | 2.10687200  |
| C | -1.55740400 | -1.74521600 | 2.98895200  |
| H | -1.11781700 | -1.63913600 | 3.98819800  |
| H | -1.49891800 | -0.77560600 | 2.48224200  |
| H | -2.61590200 | -2.00516500 | 3.11197800  |
| C | -0.81444100 | -4.18566200 | 2.92831400  |
| H | -1.83579900 | -4.55501400 | 3.07807300  |
| H | -0.25882300 | -4.95009500 | 2.37296900  |
| H | -0.35247200 | -4.07746400 | 3.91671500  |
| C | -0.37039500 | -2.23510900 | -2.91941400 |

|    |             |             |             |
|----|-------------|-------------|-------------|
| H  | 0.62996800  | -1.93109700 | -2.59466100 |
| C  | -1.02015700 | -1.00891800 | -3.60274300 |
| H  | -2.03232200 | -1.24004800 | -3.95623200 |
| H  | -1.08373900 | -0.16346600 | -2.90899200 |
| H  | -0.42363900 | -0.69791400 | -4.46898100 |
| C  | -0.19829100 | -3.40329500 | -3.91819400 |
| H  | 0.28869600  | -4.26421700 | -3.44579000 |
| H  | -1.16429300 | -3.73880800 | -4.31385400 |
| H  | 0.41720500  | -3.08605500 | -4.76823700 |
| C  | 3.53852500  | 0.50165600  | -2.29526900 |
| H  | 2.80931400  | -0.31217800 | -2.23256500 |
| C  | 2.87636200  | 1.63925900  | -3.10569900 |
| H  | 1.96981800  | 1.99405300  | -2.60501900 |
| H  | 3.55548800  | 2.49057000  | -3.23417000 |
| H  | 2.59937900  | 1.27972100  | -4.10407000 |
| C  | 4.78857500  | -0.04605400 | -3.02407700 |
| H  | 5.55821200  | 0.72795100  | -3.13042700 |
| H  | 5.23229000  | -0.88661500 | -2.47793100 |
| H  | 4.52152400  | -0.39426700 | -4.02897400 |
| Ni | -0.00554300 | 0.80161000  | -0.00998000 |
| H  | 3.98244900  | -2.40258400 | 0.05129900  |
| H  | 1.75262900  | -4.01419700 | -0.31723600 |
| C  | -1.18235500 | 2.28382400  | -0.09779000 |
| C  | 0.11214900  | 2.72073900  | 0.16969000  |
| C  | -2.47716500 | 2.53525300  | -0.30903400 |
| C  | -3.01368400 | 3.99699000  | -0.29184000 |
| C  | -4.41793200 | 4.11388900  | -0.92303900 |
| H  | -5.16967300 | 3.52140800  | -0.39144800 |
| H  | -4.74743500 | 5.16002100  | -0.89634800 |
| H  | -4.41576100 | 3.79607200  | -1.97244100 |
| C  | -2.07470100 | 4.92663600  | -1.09041700 |
| H  | -1.06358700 | 4.92788400  | -0.67504900 |
| H  | -2.00865000 | 4.60884600  | -2.13793800 |
| H  | -2.45049400 | 5.95813400  | -1.07134600 |
| C  | -3.08157900 | 4.50096100  | 1.16986900  |
| H  | -3.43737700 | 5.53977600  | 1.20946200  |
| H  | -3.76127400 | 3.88932400  | 1.77398000  |
| H  | -2.09161400 | 4.46231500  | 1.63721200  |
| C  | -3.44432200 | 1.37405900  | -0.49862400 |
| H  | -4.13575400 | 1.57690500  | -1.32814900 |
| H  | -2.86660800 | 0.48790900  | -0.78982400 |
| C  | -4.27102400 | 1.01232400  | 0.75384700  |
| H  | -4.81768900 | 1.89333800  | 1.11703700  |
| H  | -3.57879700 | 0.73025300  | 1.55932000  |
| C  | -5.27041800 | -0.12578700 | 0.50775800  |
| H  | -5.96468600 | 0.17022400  | -0.29226100 |
| H  | -4.73050900 | -1.00651800 | 0.13378200  |
| C  | -6.06944300 | -0.50918400 | 1.75840700  |
| H  | -6.64163600 | 0.34502900  | 2.14177100  |
| H  | -6.77980300 | -1.31869800 | 1.55120300  |
| H  | -5.40478500 | -0.84651000 | 2.56393600  |
| H  | 0.75110700  | 3.13774800  | -0.61425200 |
| H  | 0.41151300  | 3.00176000  | 1.18444500  |

## 1g

|   |             |             |             |
|---|-------------|-------------|-------------|
| C | -0.66064500 | 0.84561500  | 0.39766900  |
| C | -1.97210900 | 2.16851400  | 1.81074400  |
| C | -0.77802700 | 2.79363500  | 1.68807900  |
| N | 0.01516400  | 1.99713500  | 0.84355400  |
| N | -1.90995100 | 1.00160400  | 1.02493300  |
| C | 1.35022300  | 2.39162500  | 0.46274700  |
| C | 2.42092000  | 2.14504300  | 1.35421000  |
| C | 1.53857600  | 3.08852500  | -0.75387000 |
| C | 3.69434400  | 2.61955100  | 1.00196900  |
| C | 2.83347600  | 3.53761000  | -1.06190900 |
| C | 3.90148200  | 3.30905600  | -0.19334800 |
| H | 4.53218100  | 2.44511600  | 1.66821400  |
| H | 3.00225500  | 4.08048900  | -1.98627300 |
| H | 4.89415700  | 3.66868900  | -0.44673700 |
| C | -3.07495500 | 0.16531400  | 0.85631600  |
| C | -4.11869100 | 0.62246300  | 0.01612400  |
| C | -3.18780600 | -1.03593800 | 1.59058100  |
| C | -5.29108500 | -0.14645000 | -0.05909200 |
| C | -4.37831300 | -1.77139500 | 1.47713200  |
| C | -5.42394700 | -1.33188200 | 0.66460500  |
| H | -6.10648200 | 0.18755500  | -0.69248700 |
| H | -4.48873600 | -2.69453600 | 2.03599900  |
| H | -6.33928300 | -1.91164900 | 0.59518100  |

|    |             |             |             |
|----|-------------|-------------|-------------|
| C  | 0.38112600  | 3.40381300  | -1.70153500 |
| H  | -0.49286800 | 2.84382500  | -1.35721800 |
| C  | 0.02835200  | 4.91046000  | -1.65895400 |
| H  | -0.23359500 | 5.22842100  | -0.64330300 |
| H  | 0.87286600  | 5.52375600  | -1.99677900 |
| H  | -0.82567300 | 5.12155400  | -2.31390000 |
| C  | 0.66707600  | 2.94481000  | -3.14837800 |
| H  | 1.51697200  | 3.48138700  | -3.58741300 |
| H  | 0.88227500  | 1.87169400  | -3.17916900 |
| H  | -0.20713700 | 3.13489400  | -3.78246500 |
| C  | -4.01663500 | 1.91999300  | -0.78864900 |
| H  | -2.98631500 | 2.28103500  | -0.71176500 |
| C  | -4.31446900 | 1.70338700  | -2.29007300 |
| H  | -4.16338400 | 2.64024400  | -2.83988700 |
| H  | -3.65516100 | 0.94381300  | -2.72060600 |
| H  | -5.35130500 | 1.38734400  | -2.45615600 |
| C  | -4.94584100 | 3.01501400  | -0.21012100 |
| H  | -5.99728300 | 2.70823400  | -0.26977500 |
| H  | -4.71667500 | 3.22403100  | 0.84053700  |
| H  | -4.83406600 | 3.94845000  | -0.77486000 |
| C  | -2.08094500 | -1.52088500 | 2.52511800  |
| H  | -1.18335700 | -0.93548100 | 2.30363500  |
| C  | -1.73108900 | -3.00603100 | 2.28458500  |
| H  | -2.56225700 | -3.67031400 | 2.54970300  |
| H  | -1.48212500 | -3.17977100 | 1.23202700  |
| H  | -0.87544700 | -3.29645400 | 2.90861000  |
| C  | -2.45712100 | -1.27325200 | 4.00590100  |
| H  | -2.64757000 | -0.21055600 | 4.19364400  |
| H  | -3.36057900 | -1.83150500 | 4.28113600  |
| H  | -1.64457500 | -1.59586900 | 4.66880400  |
| C  | 2.21291200  | 1.41914500  | 2.68438200  |
| H  | 1.25259100  | 0.89599200  | 2.62483800  |
| C  | 3.30085600  | 0.35868900  | 2.96211100  |
| H  | 3.40632900  | -0.32959600 | 2.11929300  |
| H  | 4.27856400  | 0.81844600  | 3.14985000  |
| H  | 3.03660600  | -0.22023800 | 3.85561500  |
| C  | 2.13890700  | 2.42262100  | 3.86230400  |
| H  | 3.07606000  | 2.98620500  | 3.95055000  |
| H  | 1.32413100  | 3.14188200  | 3.72989200  |
| H  | 1.97166500  | 1.89191200  | 4.80763400  |
| Ni | 0.05558400  | -0.45834900 | -0.76280100 |
| C  | 3.81656200  | -2.36416500 | -0.05388600 |
| C  | 3.06279300  | -1.28356100 | -0.56849600 |
| C  | 3.65626200  | -0.37081500 | -1.44711900 |
| C  | 4.99053600  | -0.57085300 | -1.78819500 |
| C  | 5.73022400  | -1.65262600 | -1.26839200 |
| C  | 5.15776100  | -2.56885300 | -0.38972400 |
| C  | 1.74691100  | -2.39850500 | 0.71704800  |
| H  | 3.08613900  | 0.46612200  | -1.83526500 |
| H  | 5.47669100  | 0.12284700  | -2.46832100 |
| H  | 6.77004400  | -1.77458400 | -1.55890200 |
| H  | 5.72993200  | -3.40103200 | 0.01007900  |
| H  | 0.88115000  | -2.74870300 | 1.26000900  |
| N  | 1.76403900  | -1.33870900 | -0.06339800 |
| N  | 2.94699800  | -3.06276200 | 0.76870900  |
| C  | 3.24136500  | -4.26660900 | 1.51990200  |
| H  | 3.54326900  | -5.07756200 | 0.84791300  |
| H  | 4.04421600  | -4.08759700 | 2.24392500  |
| H  | 2.34376800  | -4.57616400 | 2.05971600  |
| H  | -0.41788000 | 3.71691700  | 2.10721300  |
| H  | -2.85443700 | 2.43309900  | 2.36701900  |
| C  | -1.16088700 | -0.81600300 | -2.31124400 |
| C  | -2.20173800 | -1.77651600 | -2.03011700 |
| C  | -1.97083600 | -3.13145900 | -1.97539300 |
| C  | -0.65521600 | -3.62548900 | -2.27184500 |
| C  | 0.35531900  | -2.75874400 | -2.60248300 |
| C  | 0.16043800  | -1.33790100 | -2.58902200 |
| H  | -1.46814500 | 0.14245600  | -2.72934000 |
| H  | -3.21530600 | -1.41203700 | -1.87600100 |
| H  | -0.48273800 | -4.70080800 | -2.28230900 |
| H  | 1.33220900  | -3.14916600 | -2.88572700 |
| H  | 0.88237100  | -0.72795700 | -3.13521300 |
| C  | -3.08116800 | -4.11279200 | -1.67755700 |
| H  | -3.23379200 | -4.81628000 | -2.50850600 |
| H  | -2.85943200 | -4.72215600 | -0.78939900 |
| H  | -4.03033700 | -3.59847200 | -1.49418800 |

**1h**

|    |             |             |             |
|----|-------------|-------------|-------------|
| C  | -1.94701200 | 0.01272000  | 0.00036600  |
| C  | -4.16960900 | -0.62937100 | -0.13650300 |
| C  | -4.15690700 | 0.69518900  | 0.14747300  |
| N  | -2.80647500 | 1.08400900  | 0.21800900  |
| N  | -2.82686400 | -1.04270100 | -0.21332300 |
| C  | -2.40710000 | 2.45185000  | 0.48161800  |
| C  | -1.97806500 | 2.80258600  | 1.78361700  |
| C  | -2.51284300 | 3.40817900  | -0.55705700 |
| C  | -1.63090700 | 4.14211000  | 2.01925300  |
| C  | -2.15794500 | 4.73509100  | -0.26351400 |
| C  | -1.71574000 | 5.09928900  | 1.00785300  |
| H  | -1.29498500 | 4.43954000  | 3.00572600  |
| H  | -2.22742300 | 5.48876800  | -1.03993400 |
| H  | -1.44248600 | 6.12982400  | 1.21239300  |
| C  | -2.45346400 | -2.41744000 | -0.47875200 |
| C  | -2.03627400 | -2.77547900 | -1.78262200 |
| C  | -2.57171500 | -3.37195000 | 0.56025700  |
| C  | -1.71202000 | -4.12051200 | -2.01939200 |
| C  | -2.23998500 | -4.70458900 | 0.26542300  |
| C  | -1.80843700 | -5.07601200 | -1.00749200 |
| H  | -1.38520800 | -4.42361000 | -3.00718700 |
| H  | -2.31908600 | -5.45696600 | 1.04216100  |
| H  | -1.55282400 | -6.11088800 | -1.21292100 |
| C  | -3.04411900 | 3.05904800  | -1.95068700 |
| H  | -2.98539600 | 1.97127400  | -2.06997500 |
| C  | -4.53000800 | 3.47600200  | -2.09672600 |
| H  | -5.16619900 | 2.99597200  | -1.34651800 |
| H  | -4.63691200 | 4.56148100  | -1.98243800 |
| H  | -4.90773400 | 3.19980100  | -3.08843400 |
| C  | -2.21867600 | 3.69513700  | -3.09243100 |
| H  | -2.33301400 | 4.78518800  | -3.11509400 |
| H  | -1.15271500 | 3.46899100  | -2.99870300 |
| H  | -2.56670500 | 3.31133300  | -4.05864600 |
| C  | -2.00827400 | -1.76429100 | -2.93022600 |
| H  | -1.88098800 | -0.76866400 | -2.49548500 |
| C  | -0.83200700 | -1.98337700 | -3.90468900 |
| H  | -0.78457700 | -1.15361800 | -4.61941700 |
| H  | 0.12233100  | -2.03082500 | -3.37061600 |
| H  | -0.94614400 | -2.90609800 | -4.48617700 |
| C  | -3.35532600 | -1.78059600 | -3.69698500 |
| H  | -3.53354400 | -2.76461200 | -4.14807800 |
| H  | -4.19753500 | -1.55453200 | -3.03367200 |
| H  | -3.34605600 | -1.03451000 | -4.50086400 |
| C  | -3.09251100 | -3.01433900 | 1.95563700  |
| H  | -3.01588400 | -1.92768500 | 2.07483900  |
| C  | -2.27385900 | -3.66412700 | 3.09458000  |
| H  | -2.40621900 | -4.75214200 | 3.11745700  |
| H  | -1.20461300 | -3.45573700 | 2.99717200  |
| H  | -2.61224900 | -3.27474800 | 4.06198400  |
| C  | -4.58451600 | -3.40739800 | 2.10618400  |
| H  | -5.21515900 | -2.91784400 | 1.35738300  |
| H  | -4.70887000 | -4.49110800 | 1.99288500  |
| H  | -4.95504800 | -3.12466800 | 3.09877800  |
| C  | -1.96059500 | 1.79040900  | 2.93060500  |
| H  | -1.84849300 | 0.79342300  | 2.49475300  |
| C  | -0.77806900 | 1.99202800  | 3.90122300  |
| H  | 0.17515700  | 2.02547500  | 3.36414800  |
| H  | -0.87671800 | 2.91609700  | 4.48341700  |
| H  | -0.74062400 | 1.16141000  | 4.61554800  |
| C  | -3.30459500 | 1.82519400  | 3.70209100  |
| H  | -3.46728600 | 2.81137400  | 4.15435400  |
| H  | -4.15231400 | 1.61135000  | 3.04176500  |
| H  | -3.30294300 | 1.07864300  | 4.50560000  |
| Ni | 0.02459900  | -0.00529500 | -0.00335100 |
| C  | 1.31293800  | -1.28005900 | 0.71752500  |
| C  | 0.35990600  | -1.02560300 | 1.69407400  |
| H  | -0.41547900 | -1.75325800 | 1.92086100  |
| H  | 0.56688500  | -0.32269500 | 2.50382800  |
| C  | 2.25808000  | -2.07788300 | 0.21073000  |
| C  | 2.88358700  | -3.22080400 | 1.06781500  |
| C  | 3.24965300  | -4.43839000 | 0.18710900  |
| H  | 3.99608700  | -4.19966800 | -0.57609800 |
| H  | 3.66741800  | -5.23593900 | 0.81399600  |
| H  | 2.36387300  | -4.84149200 | -0.31851700 |
| C  | 1.91394200  | -3.73238000 | 2.15305600  |
| H  | 1.66437300  | -2.95197500 | 2.87636400  |
| H  | 0.97993100  | -4.09574800 | 1.70928200  |
| H  | 2.37647400  | -4.56364900 | 2.70051200  |

|   |             |             |             |
|---|-------------|-------------|-------------|
| C | 4.15865900  | -2.70842700 | 1.78104500  |
| H | 4.60534600  | -3.50542100 | 2.39129600  |
| H | 4.91827000  | -2.36622200 | 1.07196900  |
| H | 3.91522100  | -1.87035500 | 2.44330600  |
| C | 2.70475500  | -1.92332600 | -1.23980300 |
| H | 2.50994300  | -2.86525700 | -1.77496400 |
| H | 2.05939800  | -1.17309800 | -1.70281600 |
| C | 4.16581600  | -1.51393000 | -1.51272700 |
| H | 4.86465300  | -2.25423800 | -1.10200100 |
| H | 4.37518200  | -0.56793400 | -0.99833100 |
| C | 4.45262000  | -1.35145400 | -3.01234100 |
| H | 4.21685500  | -2.29252000 | -3.53086800 |
| H | 3.77192400  | -0.59592500 | -3.43042300 |
| C | 5.90205600  | -0.95389600 | -3.31237000 |
| H | 6.60565500  | -1.70719500 | -2.93600900 |
| H | 6.07453600  | -0.84633100 | -4.38984900 |
| H | 6.15555200  | 0.00150400  | -2.83695800 |
| H | -4.98625800 | -1.31186600 | -0.29025300 |
| H | -4.96017000 | 1.39254500  | 0.30496100  |
| C | 1.32706100  | 1.25274400  | -0.73093800 |
| C | 0.37194100  | 1.00389600  | -1.70610300 |
| H | -0.39447500 | 1.73948300  | -1.93781000 |
| H | 0.56963200  | 0.29235500  | -2.51051700 |
| C | 2.27997400  | 2.04068300  | -0.22343700 |
| C | 2.92389000  | 3.17258900  | -1.08068600 |
| C | 3.26362600  | 4.40184300  | -0.20561400 |
| H | 3.99263700  | 4.17489400  | 0.57788700  |
| H | 3.69270200  | 5.19461700  | -0.83095600 |
| H | 2.36394300  | 4.80550800  | 0.27443300  |
| C | 1.98117800  | 3.66660600  | -2.19692200 |
| H | 1.74897500  | 2.87487000  | -2.91381800 |
| H | 1.03676400  | 4.03679000  | -1.78205600 |
| H | 2.45698500  | 4.48939600  | -2.74572500 |
| C | 4.21825300  | 2.65591900  | -1.75534600 |
| H | 4.67445600  | 3.44603900  | -2.36740300 |
| H | 4.96308100  | 2.32994100  | -1.02360600 |
| H | 3.99594000  | 1.80584600  | -2.40965600 |
| C | 2.71297300  | 1.88837500  | 1.23184100  |
| H | 2.51173800  | 2.83116800  | 1.76332800  |
| H | 2.06225900  | 1.13898800  | 1.68857600  |
| C | 4.17061000  | 1.47976400  | 1.52345800  |
| H | 4.87392400  | 2.22658600  | 1.13266600  |
| H | 4.39182200  | 0.53987600  | 1.00270800  |
| C | 4.43334100  | 1.30194600  | 3.02574400  |
| H | 4.18902000  | 2.23758800  | 3.55009500  |
| H | 3.74630300  | 0.54196200  | 3.42483200  |
| C | 5.87780900  | 0.90105200  | 3.34454000  |
| H | 6.58755500  | 1.65761300  | 2.98672400  |
| H | 6.03333500  | 0.78277500  | 4.42347100  |
| H | 6.13824500  | -0.04983500 | 2.86382900  |

**1i**

|   |             |             |             |
|---|-------------|-------------|-------------|
| C | 0.86701200  | -0.72654900 | -0.00004800 |
| C | 2.80818100  | -2.01767600 | 0.00019600  |
| C | 1.76075100  | -2.88015200 | 0.00026100  |
| N | 0.58921700  | -2.10332200 | 0.00008800  |
| N | 2.27110900  | -0.71811000 | 0.00000700  |
| C | -0.73833800 | -2.66466100 | 0.00010800  |
| C | -1.36612600 | -2.94554800 | 1.23528100  |
| C | -1.36604600 | -2.94586000 | -1.23503800 |
| C | -2.64957800 | -3.51426900 | 1.20882500  |
| C | -2.64951200 | -3.51454700 | -1.20852400 |
| C | -3.28820200 | -3.79677800 | 0.00016600  |
| H | -3.15299400 | -3.73476200 | 2.14490100  |
| H | -3.15288400 | -3.73522400 | -2.14458200 |
| H | -4.28080100 | -4.23735200 | 0.00019000  |
| C | 3.08323100  | 0.47295900  | -0.00005200 |
| C | 3.48353900  | 1.03183000  | -1.23511000 |
| C | 3.48366800  | 1.03186300  | 1.23495000  |
| C | 4.29106000  | 2.17998900  | -1.20876400 |
| C | 4.29120700  | 2.18000400  | 1.20848300  |
| C | 4.69210700  | 2.75150200  | -0.00017100 |
| H | 4.60690800  | 2.62989000  | -2.14471300 |
| H | 4.60720400  | 2.62991600  | 2.14437800  |
| H | 5.31840500  | 3.63877700  | -0.00020900 |
| H | -0.69993000 | -2.64004600 | -2.57610700 |
| C | 0.28234000  | -2.20530400 | -2.36836600 |
| C | -0.47897800 | -3.92429000 | -3.40851700 |

|    |             |             |             |
|----|-------------|-------------|-------------|
| H  | 0.12534600  | -4.65532500 | -2.85889000 |
| H  | -1.43119400 | -4.40314400 | -3.66721600 |
| H  | 0.04052900  | -3.68613300 | -4.34458500 |
| C  | -1.50131000 | -1.58583700 | -3.37389700 |
| H  | -2.50933900 | -1.94561700 | -3.61500600 |
| H  | -1.59159900 | -0.65950100 | -2.79626800 |
| H  | -0.99153700 | -1.35586300 | -4.31774800 |
| C  | 3.04925400  | 0.43870300  | -2.57449400 |
| H  | 2.48705600  | -0.47712700 | -2.36696000 |
| C  | 2.09544500  | 1.39810700  | -3.32372000 |
| H  | 1.76131200  | 0.94503800  | -4.26539300 |
| H  | 1.21295900  | 1.61052800  | -2.71000900 |
| H  | 2.59280500  | 2.34664500  | -3.56314200 |
| C  | 4.26013200  | 0.05366900  | -3.45523600 |
| H  | 4.85445500  | 0.93335700  | -3.73105300 |
| H  | 4.92225000  | -0.64940800 | -2.93664700 |
| H  | 3.91774200  | -0.42025200 | -4.38310900 |
| C  | 3.04951200  | 0.43878000  | 2.57438900  |
| H  | 2.48718300  | -0.47698800 | 2.36693800  |
| C  | 2.09590200  | 1.39827000  | 3.32375400  |
| H  | 2.59335900  | 2.34676800  | 3.56312500  |
| H  | 1.21334300  | 1.61077100  | 2.71017700  |
| H  | 1.76186000  | 0.94521500  | 4.26546500  |
| C  | 4.26047900  | 0.05362900  | 3.45495300  |
| H  | 4.92241500  | -0.64957000 | 2.93629400  |
| H  | 4.85496600  | 0.93325900  | 3.73060600  |
| H  | 3.91818400  | -0.42019000 | 4.38291400  |
| C  | -0.70006500 | -2.63940800 | 2.57630500  |
| H  | 0.28204100  | -2.20433800 | 2.36847500  |
| C  | -1.50174600 | -1.58542700 | 3.37408800  |
| H  | -1.59243400 | -0.65916200 | 2.79640900  |
| H  | -2.50961900 | -1.94554300 | 3.61534500  |
| H  | -0.99195200 | -1.35519500 | 4.31786400  |
| C  | -0.47865300 | -3.92353000 | 3.40878700  |
| H  | -1.43071500 | -4.40267300 | 3.66752200  |
| H  | 0.12589600  | -4.65439700 | 2.85918400  |
| H  | 0.04079800  | -3.68516200 | 4.34483200  |
| Ni | -0.30213500 | 0.64847300  | -0.00011900 |
| C  | -3.46660400 | 3.31713700  | -0.00010600 |
| C  | -2.94427900 | 2.00490500  | -0.00009800 |
| C  | -3.80601700 | 0.90303000  | -0.00009800 |
| C  | -5.17500000 | 1.15385800  | -0.00008800 |
| C  | -5.68489500 | 2.46845300  | -0.00007600 |
| C  | -4.84016200 | 3.57527300  | -0.00007800 |
| C  | -1.25500200 | 3.35632800  | -0.00007300 |
| H  | -3.40408300 | -0.10488400 | -0.00010500 |
| H  | -5.86933400 | 0.31840700  | -0.00008300 |
| H  | -6.76049100 | 2.62196000  | -0.00006100 |
| H  | -5.23449900 | 4.58720500  | -0.00005900 |
| H  | -0.25286100 | 3.75937700  | -0.00008400 |
| N  | -1.54624900 | 2.06613500  | -0.00008300 |
| N  | -2.36432000 | 4.15959300  | -0.00014000 |
| C  | -2.38400400 | 5.60886500  | 0.00018800  |
| H  | -2.89600400 | 5.98905800  | -0.89074300 |
| H  | -2.89435700 | 5.98877300  | 0.89219500  |
| H  | -1.35617900 | 5.97791500  | -0.00072800 |
| H  | 1.73305500  | -3.95631700 | 0.00032800  |
| H  | 3.86973300  | -2.19619400 | 0.00023100  |

Cartesian coordinates for the stationary points given in Fig. 1.

### R1

|   |             |             |             |
|---|-------------|-------------|-------------|
| C | -0.15563900 | -0.36004900 | -0.00001200 |
| C | 0.36926600  | 0.95617000  | 0.00000200  |
| C | 1.75650400  | 1.15031300  | 0.00001700  |
| C | 2.57534800  | 0.02516800  | 0.00001300  |
| C | 2.03507700  | -1.27733000 | -0.00000500 |
| C | 0.65904600  | -1.49518400 | -0.00001800 |
| C | -1.75159600 | 1.16325000  | 0.00000500  |
| H | 2.16690000  | 2.15548600  | 0.00002000  |
| H | 3.65490200  | 0.14826600  | 0.00002000  |
| H | 2.70721500  | -2.13109300 | -0.00000600 |
| H | 0.24826100  | -2.50089000 | -0.00002400 |
| H | -2.76151400 | 1.55713600  | 0.00001700  |
| N | -0.66210700 | 1.88685000  | -0.00002800 |

|   |             |             |             |
|---|-------------|-------------|-------------|
| N | -1.53229200 | -0.19766800 | 0.00000400  |
| C | -2.53130400 | -1.24672700 | 0.00001300  |
| H | -2.43533900 | -1.87766700 | -0.89100100 |
| H | -2.43527500 | -1.87770800 | 0.89099100  |
| H | -3.52457400 | -0.79147100 | 0.00006100  |

### R2

|   |             |             |             |
|---|-------------|-------------|-------------|
| C | -1.32767800 | 1.64403200  | 0.00382300  |
| C | -1.88036300 | 2.80663900  | 0.24302900  |
| H | -2.46090700 | 3.33411900  | -0.51314000 |
| H | -1.78743100 | 3.29862700  | 1.21065700  |
| C | -0.75298800 | 0.49134900  | -0.25370600 |
| C | -1.49110000 | -0.84306300 | 0.02810000  |
| C | -1.01975400 | -1.95105700 | -0.93648300 |
| H | 0.04236400  | -2.18767000 | -0.81257500 |
| H | -1.58490800 | -2.87137500 | -0.74691900 |
| H | -1.18615100 | -1.66878100 | -1.98281900 |
| C | -3.01203000 | -0.65986000 | -0.15415200 |
| H | -3.40347300 | 0.11543300  | 0.51170700  |
| H | -3.25354400 | -0.37071700 | -1.18330400 |
| H | -3.53616700 | -1.59696100 | 0.06925700  |
| C | -1.22368000 | -1.28608800 | 1.48663900  |
| H | -1.74457500 | -2.22823700 | 1.70112400  |
| H | -0.15752700 | -1.44299200 | 1.67859700  |
| H | -1.58410700 | -0.52925400 | 2.19184800  |
| C | 0.66932100  | 0.51561400  | -0.81484000 |
| H | 0.71932800  | -0.10895800 | -1.71708800 |
| H | 0.88412300  | 1.54007000  | -1.14071100 |
| C | 1.78038100  | 0.07726800  | 0.15939700  |
| H | 1.63743300  | -0.97047500 | 0.45489000  |
| H | 1.70373900  | 0.67110300  | 1.08064800  |
| C | 3.18405900  | 0.23736300  | -0.44119100 |
| H | 3.24899800  | -0.34629400 | -1.37072400 |
| C | 3.33605200  | 1.28701300  | -0.73004000 |
| H | 4.30052000  | -0.19754000 | 0.51410100  |
| H | 4.19668600  | -1.25400700 | 0.79118600  |
| H | 5.28921600  | -0.06865100 | 0.05887100  |
| H | 4.28072000  | 0.39007200  | 1.44023500  |

### 10

|   |             |             |             |
|---|-------------|-------------|-------------|
| C | -0.22602800 | -0.90528900 | 0.27647400  |
| C | 0.18361300  | -2.68906300 | 1.70467900  |
| C | -1.15984000 | -2.49649100 | 1.68533700  |
| N | -1.40496400 | -1.41725000 | 0.82039300  |
| N | 0.74717400  | -1.72279400 | 0.85244900  |
| C | -2.72499300 | -0.90723000 | 0.52890400  |
| C | -3.26375700 | 0.10892000  | 1.35060000  |
| C | -3.44446200 | -1.45278600 | -0.55869000 |
| C | -4.55879300 | 0.56763600  | 1.06200000  |
| C | -4.73377500 | -0.95631700 | -0.80701800 |
| C | -5.28854400 | 0.04173600  | -0.00486300 |
| H | -4.99515300 | 1.34874800  | 1.67593100  |
| H | -5.30502400 | -1.35388500 | -1.63949900 |
| H | -6.28757400 | 0.41215100  | -0.21338200 |
| C | 2.16612700  | -1.58132800 | 0.63416500  |
| C | 2.76456600  | -2.24552400 | -0.46008800 |
| C | 2.91801700  | -0.79436700 | 1.53606800  |
| C | 4.14821900  | -2.09086200 | -0.64454700 |
| C | 4.29853300  | -0.67368900 | 1.30953200  |
| C | 4.90959400  | -1.31156400 | 0.22830500  |
| H | 4.63280600  | -2.59049200 | -1.47720900 |
| H | 4.89885800  | -0.07588600 | 1.98797800  |
| H | 5.97903900  | -1.20831800 | 0.07091800  |
| C | -2.86050200 | -2.53484000 | -1.46636500 |
| H | -1.87134700 | -2.79998000 | -1.07963700 |
| C | -3.72315300 | -3.81831800 | -1.45655000 |
| H | -3.84013500 | -4.21253700 | -0.44039300 |
| H | -4.72485100 | -3.63145300 | -1.86185400 |
| H | -3.25430900 | -4.59482600 | -2.07272400 |
| C | -2.66221500 | -2.00689000 | -2.90672700 |
| H | -3.61948500 | -1.72564300 | -3.36245000 |
| H | -2.00873300 | -1.12766500 | -2.91156900 |
| H | -2.20496600 | -2.78101200 | -3.53521900 |
| C | 1.96479200  | -3.13009100 | -1.41647300 |
| H | 0.91239600  | -3.07536000 | -1.12168900 |

|    |             |             |             |
|----|-------------|-------------|-------------|
| C  | 2.05277400  | -2.63012200 | -2.87631400 |
| H  | 1.45414400  | -3.27334700 | -3.53231800 |
| H  | 1.66700800  | -1.60892000 | -2.95989800 |
| H  | 3.08502000  | -2.64378200 | -3.24697200 |
| C  | 2.40700100  | -4.60911600 | -1.31015000 |
| H  | 3.45361100  | -4.73480900 | -1.61317600 |
| H  | 2.30784700  | -4.98162900 | -0.28414500 |
| H  | 1.79066400  | -5.23822500 | -1.96335700 |
| C  | 2.27894600  | -0.08996900 | 2.73339900  |
| H  | 1.21048400  | -0.32588100 | 2.73003600  |
| C  | 2.40255300  | 1.44724900  | 2.62699700  |
| H  | 3.45312700  | 1.76411900  | 2.62007600  |
| H  | 1.92178900  | 1.81220300  | 1.71367500  |
| H  | 1.91565600  | 1.92672000  | 3.48476400  |
| C  | 2.86392200  | -0.60326300 | 4.07022500  |
| H  | 2.74220600  | -1.68822200 | 4.16757300  |
| H  | 3.93383300  | -0.37735100 | 4.15287400  |
| H  | 2.35504100  | -0.12518900 | 4.91565600  |
| C  | -2.48641500 | 0.71515500  | 2.51832300  |
| H  | -1.49680500 | 0.24817000  | 2.54063500  |
| C  | -2.27021500 | 2.23421200  | 2.32651800  |
| H  | -1.75582400 | 2.44211100  | 1.38239800  |
| H  | -3.22359600 | 2.77644600  | 2.32263100  |
| H  | -1.66131700 | 2.63542800  | 3.14581300  |
| C  | -3.17472400 | 0.41803300  | 3.87153100  |
| H  | -4.17206000 | 0.87162500  | 3.91842500  |
| H  | -3.28855800 | -0.66025200 | 4.03316600  |
| H  | -2.58154100 | 0.82691200  | 4.69829400  |
| Ni | -0.07475900 | 0.47039100  | -0.93916600 |
| C  | 1.19125000  | 3.61353400  | -1.18899300 |
| C  | -0.03545600 | 3.13419700  | -1.71735600 |
| C  | -1.16811500 | 3.95125300  | -1.70290700 |
| C  | -1.05476400 | 5.22972100  | -1.15018100 |
| C  | 0.16363500  | 5.69052600  | -0.62517600 |
| C  | 1.30834600  | 4.88801500  | -0.63179600 |
| C  | 1.42126700  | 1.50200700  | -1.90631500 |
| H  | -2.10619800 | 3.59183500  | -2.11581200 |
| H  | -1.92413200 | 5.88137600  | -1.12781800 |
| H  | 0.22049400  | 6.69175800  | -0.20626100 |
| H  | 2.24820800  | 5.24771200  | -0.22223900 |
| H  | 2.00693400  | 0.77514100  | -2.46253100 |
| N  | 0.13155600  | 1.83926000  | -2.22324600 |
| N  | 2.10913100  | 2.59455000  | -1.35757500 |
| C  | 3.50643200  | 2.63125500  | -0.99512900 |
| H  | 4.02125900  | 3.45175000  | -1.51119400 |
| H  | 3.63795900  | 2.76092700  | 0.08624300  |
| H  | 3.97138800  | 1.68506600  | -1.28170900 |
| H  | -1.95601900 | -3.01404400 | 2.19185500  |
| H  | 0.78780400  | -3.40678600 | 2.23208500  |

### TS<sub>10-11</sub>

|   |             |             |             |
|---|-------------|-------------|-------------|
| C | 0.97427200  | -0.67409300 | 0.02074600  |
| C | 2.96674900  | -1.81871900 | -0.17437700 |
| C | 1.98976500  | -2.74691200 | 0.00183700  |
| N | 0.78247200  | -2.04251500 | 0.12141900  |
| N | 2.34109800  | -0.56132800 | -0.16014600 |
| C | -0.50821700 | -2.66727900 | 0.32235100  |
| C | -0.91964600 | -2.96452600 | 1.64180200  |
| C | -1.30874200 | -2.96478700 | -0.80415500 |
| C | -2.16720000 | -3.58394700 | 1.81342900  |
| C | -2.54630100 | -3.58780300 | -0.57539600 |
| C | -2.97232700 | -3.89566700 | 0.71690000  |
| H | -2.51249200 | -3.81754600 | 2.81513100  |
| H | -3.18371300 | -3.82577400 | -1.41983800 |
| H | -3.93505200 | -4.37309500 | 0.87023100  |
| C | 3.05577800  | 0.68587000  | -0.32771400 |
| C | 3.21729200  | 1.21072400  | -1.62880900 |
| C | 3.58405300  | 1.32652600  | 0.81474200  |
| C | 3.93200700  | 2.41159000  | -1.76363300 |
| C | 4.29176500  | 2.52371200  | 0.62460900  |
| C | 4.46504900  | 3.06288500  | -0.65079100 |
| H | 4.06583300  | 2.84094300  | -2.75090400 |
| H | 4.70564500  | 3.03937400  | 1.48503200  |
| H | 5.01311900  | 3.99141600  | -0.77693900 |
| C | -0.86860700 | -2.65182600 | -2.23449300 |
| H | 0.05036200  | -2.05880200 | -2.18197800 |
| C | -0.54383100 | -3.95269700 | -3.00831600 |
| H | 0.23418900  | -4.53765300 | -2.50354400 |

|    |             |             |             |
|----|-------------|-------------|-------------|
| H  | -1.43356700 | -4.58697600 | -3.10244800 |
| H  | -0.19160300 | -3.71520900 | -4.01908400 |
| C  | -1.91400300 | -1.80029500 | -2.99135000 |
| H  | -2.85835700 | -2.34378500 | -3.11808300 |
| H  | -2.12571100 | -0.86126300 | -2.46873900 |
| H  | -1.53741300 | -1.55693800 | -3.99233700 |
| C  | 2.64923000  | 0.52366600  | -2.87048600 |
| H  | 2.11320600  | -0.37375200 | -2.54519400 |
| C  | 1.62554900  | 1.42471000  | -3.59968000 |
| H  | 1.21155600  | 0.89847000  | -4.46794400 |
| H  | 0.79779400  | 1.69288300  | -2.93541800 |
| H  | 2.09235600  | 2.34963500  | -3.95942700 |
| C  | 3.77586100  | 0.07181500  | -3.82960100 |
| H  | 4.34085300  | 0.92995100  | -4.21273800 |
| H  | 4.48350000  | -0.59895400 | -3.32840500 |
| H  | 3.35122500  | -0.45978600 | -4.68934800 |
| C  | 3.40380600  | 0.76869000  | 2.26482000  |
| H  | 2.81945000  | -0.15424400 | 2.15364600  |
| C  | 2.60329800  | 1.74491500  | 3.11928900  |
| H  | 3.13475800  | 2.69517400  | 3.24906000  |
| H  | 1.62491000  | 1.95996200  | 2.67646300  |
| H  | 2.44560300  | 1.30915100  | 4.11325900  |
| C  | 4.76126400  | 0.40883900  | 2.87470400  |
| H  | 5.31454700  | -0.31424800 | 2.26446200  |
| H  | 5.39294300  | 1.29657900  | 2.99726500  |
| H  | 4.60469900  | -0.03016200 | 3.86722800  |
| C  | -0.07294200 | -2.60919200 | 2.86406800  |
| H  | 0.88529100  | -2.21465800 | 2.51009800  |
| C  | -0.74759100 | -1.49382300 | 3.69757000  |
| H  | -0.91668800 | -0.60034700 | 3.08634200  |
| H  | -1.71603100 | -1.82487400 | 4.09114800  |
| H  | -0.11366800 | -1.21559600 | 4.54833800  |
| C  | 0.23365600  | -3.84761600 | 3.73721800  |
| H  | -0.68084700 | -4.27633300 | 4.16350400  |
| H  | 0.73174200  | -4.63158300 | 3.15544600  |
| H  | 0.89034800  | -3.57063700 | 4.57035700  |
| Ni | -0.41215600 | 0.63648500  | -0.00022200 |
| C  | -3.72572400 | 2.92035100  | 0.26810000  |
| C  | -3.83334700 | 2.25536500  | -0.98175800 |
| C  | -5.00843400 | 2.38548100  | -1.73547900 |
| C  | -6.03875900 | 3.16891700  | -1.22210200 |
| C  | -5.91635300 | 3.81884500  | 0.02273200  |
| C  | -4.75781000 | 3.70372600  | 0.79069200  |
| C  | -1.88172900 | 1.73305700  | -0.19005800 |
| H  | -5.09981200 | 1.88242400  | -2.69391100 |
| H  | -6.95869100 | 3.28365100  | -1.78969500 |
| H  | -6.74193500 | 4.42142000  | 0.39244700  |
| H  | -4.66939900 | 4.20381100  | 1.75150200  |
| H  | -0.39667600 | 2.05491000  | -0.39194600 |
| N  | -2.67188900 | 1.55821200  | -1.24982400 |
| N  | -2.47024600 | 2.59512200  | 0.74191000  |
| C  | -1.90579900 | 3.01589900  | 2.00507200  |
| H  | -1.95401300 | 4.10721400  | 2.10179800  |
| H  | -2.43670300 | 2.56528500  | 2.85366900  |
| H  | -0.85990000 | 2.70174100  | 2.03721800  |
| H  | 2.03279900  | -3.82085800 | 0.05372000  |
| H  | 4.02921700  | -1.92449700 | -0.30749100 |

### 11

|   |             |             |             |
|---|-------------|-------------|-------------|
| C | 1.11422600  | 0.00019100  | 0.22613000  |
| C | 2.96466900  | -0.67873100 | 1.41661000  |
| C | 2.96449200  | 0.67995000  | 1.41640700  |
| N | 1.83244300  | 1.08448600  | 0.69007300  |
| N | 1.83272500  | -1.08377900 | 0.69040300  |
| C | 1.46869200  | 2.46994000  | 0.47751600  |
| C | 1.98789500  | 3.14671600  | -0.64858700 |
| C | 0.62623100  | 3.10365600  | 1.41824000  |
| C | 1.64309200  | 4.49743300  | -0.81317700 |
| C | 0.31077300  | 4.45491700  | 1.20429300  |
| C | 0.81285300  | 5.14641200  | 0.10159400  |
| H | 2.02634200  | 5.04331800  | -1.66887800 |
| H | -0.33654400 | 4.96713300  | 1.90828200  |
| H | 0.55596600  | 6.19083100  | -0.04589100 |
| C | 1.46932800  | -2.46937500 | 0.47817300  |
| C | 0.62672100  | -3.10297000 | 1.41884300  |
| C | 1.98897100  | -3.14638600 | -0.64758400 |
| C | 0.31157600  | -4.45435300 | 1.20520100  |
| C | 1.64446000  | -4.49721600 | -0.81188200 |

|    |             |             |             |
|----|-------------|-------------|-------------|
| C  | 0.81407200  | -5.14607300 | 0.10283200  |
| H  | -0.33582300 | -4.96648900 | 1.90917300  |
| H  | 2.02806600  | -5.04328200 | -1.66730800 |
| H  | 0.55741200  | -6.19058100 | -0.04442200 |
| C  | 0.07172700  | 2.38268100  | 2.64711500  |
| H  | 0.38318000  | 1.33433100  | 2.59525800  |
| C  | 0.65491500  | 2.97597900  | 3.95216100  |
| H  | 1.75023100  | 2.92910900  | 3.95916600  |
| H  | 0.36323000  | 4.02590600  | 4.07494100  |
| H  | 0.28313900  | 2.42049900  | 4.82136500  |
| C  | -1.47410800 | 2.39613100  | 2.67241100  |
| H  | -1.86480300 | 3.41855600  | 2.73964600  |
| H  | -1.88517000 | 1.92533200  | 1.77416300  |
| H  | -1.83795800 | 1.84306400  | 3.54705400  |
| C  | 0.07180100  | -2.38177100 | 2.64740000  |
| H  | 0.38301700  | -1.33335900 | 2.59530800  |
| C  | -1.47402400 | -2.39556900 | 2.67244400  |
| H  | -1.83815200 | -1.84227700 | 3.54683300  |
| H  | -1.88505500 | -1.92517500 | 1.77396800  |
| H  | -1.86451700 | -3.41805200 | 2.73997800  |
| C  | 0.65493500  | -2.97456200 | 3.95271300  |
| H  | 0.36353500  | -4.02454000 | 4.07572200  |
| H  | 1.75023500  | -2.92736200 | 3.95988100  |
| H  | 0.28284600  | -2.41895800 | 4.82170200  |
| C  | 2.90930300  | -2.46826500 | -1.66209100 |
| H  | 2.96907600  | -1.40581100 | -1.40627600 |
| C  | 2.34437100  | -2.55427800 | -3.09786200 |
| H  | 2.27375700  | -3.59293900 | -3.44265100 |
| H  | 1.34909500  | -2.10196500 | -3.14704600 |
| H  | 3.00161000  | -2.01705100 | -3.79230500 |
| C  | 4.34167200  | -3.05039400 | -1.59220100 |
| H  | 4.76754600  | -2.94617500 | -0.58735500 |
| H  | 4.34830800  | -4.11637500 | -1.84996900 |
| H  | 4.99963600  | -2.52929100 | -2.29784900 |
| C  | 2.90795000  | 2.46842900  | -1.66323100 |
| H  | 2.96796100  | 1.40605500  | -1.40712600 |
| C  | 2.34245300  | 2.55397200  | -3.09881400 |
| H  | 1.34720500  | 2.10156300  | -3.14749500 |
| H  | 2.27161000  | 3.59253900  | -3.44384900 |
| H  | 2.99948000  | 2.01661900  | -3.79335800 |
| C  | 4.34026000  | 3.05076800  | -1.59409600 |
| H  | 4.34668200  | 4.11664800  | -1.85228300 |
| H  | 4.76654300  | 2.94698500  | -0.58937900 |
| H  | 4.99801800  | 2.52947900  | -2.29980300 |
| Ni | -0.44716600 | -0.00027400 | -0.85021500 |
| C  | -4.39470100 | -0.00097900 | -1.47483700 |
| C  | -3.89785100 | -0.00010000 | -0.14469200 |
| C  | -4.79133400 | 0.00061300  | 0.93150500  |
| C  | -6.15778900 | 0.00023400  | 0.65160700  |
| C  | -6.63613100 | -0.00074000 | -0.67143300 |
| C  | -5.75982900 | -0.00136400 | -1.75872600 |
| C  | -2.16635600 | -0.00063900 | -1.48299300 |
| H  | -4.42372300 | 0.00135600  | 1.95358700  |
| H  | -6.87063000 | 0.00070100  | 1.47216800  |
| H  | -7.70777700 | -0.00101000 | -0.85159900 |
| H  | -6.13219200 | -0.00210700 | -2.77953600 |
| H  | 0.36054500  | -0.00072900 | -2.05831600 |
| N  | -2.51025000 | 0.00016600  | -0.19878300 |
| N  | -3.26633700 | -0.00134500 | -2.29406700 |
| C  | -3.26025900 | -0.00247500 | -3.74218500 |
| H  | -3.76369900 | -0.89403800 | -4.13499500 |
| H  | -3.76431100 | 0.88812900  | -4.13638100 |
| H  | -2.22093200 | -0.00237800 | -4.07469600 |
| H  | 3.64345500  | 1.39000700  | 1.85499000  |
| H  | 3.64382100  | -1.38848600 | 1.85539100  |

12

|   |             |             |             |
|---|-------------|-------------|-------------|
| C | -0.72991700 | -1.24851000 | -0.04962800 |
| C | -2.29084200 | -2.94198500 | -0.19981700 |
| C | -1.43935600 | -3.27161400 | 0.79817000  |
| N | -0.48657300 | -2.24220100 | 0.88216400  |
| N | -1.86349100 | -1.70187900 | -0.70886400 |
| C | 0.64289400  | -2.35892400 | 1.78454300  |
| C | 1.74780800  | -3.13598500 | 1.36448400  |
| C | 0.55443700  | -1.79982400 | 3.08069200  |
| C | 2.79327800  | -3.33099400 | 2.28092500  |
| C | 1.63042700  | -2.02730800 | 3.95448900  |
| C | 2.73733200  | -2.78102100 | 3.56159300  |

|    |             |             |             |
|----|-------------|-------------|-------------|
| H  | 3.65323800  | -3.92479300 | 1.99005700  |
| H  | 1.59754900  | -1.61239200 | 4.95465500  |
| H  | 3.55401200  | -2.94598400 | 4.25789900  |
| C  | -2.59446000 | -1.04801000 | -1.77617500 |
| C  | -3.84858100 | -0.46627300 | -1.47383900 |
| C  | -2.08567200 | -1.10279900 | -3.09694800 |
| C  | -4.58515800 | 0.08373000  | -2.53683400 |
| C  | -2.85822900 | -0.52354700 | -4.11636900 |
| C  | -4.09545300 | 0.06287200  | -3.84176600 |
| H  | -5.55139900 | 0.53317700  | -2.33547900 |
| H  | -2.49541000 | -0.54408300 | -5.13717600 |
| H  | -4.67958600 | 0.49640900  | -4.64769900 |
| C  | -0.68518100 | -1.03621000 | 3.55369100  |
| H  | -1.14572100 | -0.56369400 | 2.68047000  |
| C  | -1.70957000 | -2.00683900 | 4.19584700  |
| H  | -2.02552900 | -2.79079600 | 3.49922000  |
| H  | -1.28154700 | -2.49332700 | 5.08160200  |
| H  | -2.60365700 | -1.45534900 | 4.51021400  |
| C  | -0.36102000 | 0.10980200  | 4.53283600  |
| H  | 0.03058600  | -0.25774000 | 5.48987400  |
| H  | 0.35600200  | 0.80781800  | 4.09438200  |
| H  | -1.27809200 | 0.66957200  | 4.74601200  |
| C  | -4.44296900 | -0.46112200 | -0.06262500 |
| H  | -3.64986800 | -0.73495400 | 0.64038800  |
| C  | -4.96525400 | 0.92806100  | 0.36464100  |
| H  | -5.30900300 | 0.88892300  | 1.40458500  |
| H  | -4.18438600 | 1.68867300  | 0.30111500  |
| H  | -5.81545000 | 1.24931100  | -0.24937200 |
| C  | -5.57888500 | -1.50886200 | 0.05863400  |
| H  | -6.40998700 | -1.25910800 | -0.61221600 |
| H  | -5.23841700 | -2.51862600 | -0.19494000 |
| H  | -5.96669600 | -1.52884200 | 1.08373500  |
| C  | -0.78520200 | -1.83782000 | -3.43320200 |
| H  | -0.12434300 | -1.76925400 | -2.56321000 |
| C  | -0.02183100 | -1.22322200 | -4.62516000 |
| H  | -0.54173900 | -1.38771800 | -5.57672000 |
| H  | 0.12197500  | -0.14446000 | -4.50000500 |
| H  | 0.96602100  | -1.68978800 | -4.70948200 |
| C  | -1.06558800 | -3.33872100 | -3.70270800 |
| H  | -1.53431700 | -3.82281800 | -2.83962400 |
| H  | -1.73283800 | -3.45897400 | -4.56518300 |
| H  | -0.12932000 | -3.86678700 | -3.92010100 |
| C  | 1.80274000  | -3.81730700 | -0.00582900 |
| H  | 0.99068200  | -3.41272500 | -0.61732500 |
| C  | 3.11635400  | -3.53306600 | -0.76612700 |
| H  | 3.24928800  | -2.45925000 | -0.92386600 |
| H  | 3.99184700  | -3.91656200 | -0.22915900 |
| H  | 3.09098600  | -4.02287100 | -1.74715600 |
| C  | 1.57717900  | -5.34328000 | 0.13464100  |
| H  | 2.37265000  | -5.80324100 | 0.73325000  |
| H  | 0.62091300  | -5.56597500 | 0.62122100  |
| H  | 1.57627800  | -5.82191500 | -0.85207100 |
| Ni | 0.31095600  | 0.28583600  | -0.48666100 |
| C  | -2.23262800 | 3.45234900  | 0.54060300  |
| C  | -1.76160300 | 2.93339400  | 1.77052400  |
| C  | -2.10657300 | 3.57479100  | 2.96655500  |
| C  | -2.91116900 | 4.71245000  | 2.90244700  |
| C  | -3.37464000 | 5.21214800  | 1.67104600  |
| C  | -3.04314300 | 4.58746100  | 0.46672400  |
| C  | -0.95691800 | 1.61220400  | 0.22094500  |
| H  | -1.74670500 | 3.19116800  | 3.91746100  |
| H  | -3.18657000 | 5.22645400  | 3.82010300  |
| H  | -3.99880800 | 6.10204200  | 1.65570900  |
| H  | -3.39879500 | 4.97911500  | -0.48305000 |
| H  | 1.32883100  | -0.76000200 | -0.86883100 |
| N  | -0.99527300 | 1.80136600  | 1.53726700  |
| N  | -1.72333900 | 2.59851200  | -0.42463700 |
| C  | -2.02004300 | 2.71327700  | -1.83564000 |
| H  | -3.10032100 | 2.81111000  | -1.99195600 |
| H  | -1.53001800 | 3.58834900  | -2.28586500 |
| H  | -1.68389500 | 1.81026100  | -2.34548700 |
| H  | -1.40289100 | -4.12729100 | 1.44789900  |
| H  | -3.15085400 | -3.45010800 | -0.59657100 |
| C  | 2.10420500  | 1.53277800  | -0.93040200 |
| C  | 1.11882500  | 1.64815300  | -1.84227600 |
| H  | 0.52566800  | 2.55628500  | -1.88469200 |
| H  | 1.07084600  | 0.98750900  | -2.70811100 |
| C  | 3.24416500  | 1.82752400  | -0.33138300 |
| C  | 3.67510300  | 1.35428800  | 1.07036400  |
| C  | 4.67909800  | 2.33692800  | 1.71140600  |

|   |            |             |             |
|---|------------|-------------|-------------|
| H | 4.25733700 | 3.34510700  | 1.79909400  |
| H | 4.92340900 | 1.99224000  | 2.72292800  |
| H | 5.61970700 | 2.40572200  | 1.15417600  |
| C | 4.33113100 | -0.04195700 | 0.96862800  |
| H | 3.62320100 | -0.76411500 | 0.55506900  |
| H | 5.22400000 | -0.03096300 | 0.33434900  |
| H | 4.62891400 | -0.39185400 | 1.96483000  |
| C | 2.44782900 | 1.26328000  | 1.99381100  |
| H | 2.74900900 | 0.90754000  | 2.98659100  |
| H | 1.95541700 | 2.23391500  | 2.10491000  |
| H | 1.70047700 | 0.56653400  | 1.60331700  |
| C | 4.18459600 | 2.70125100  | -1.17596600 |
| H | 3.60148100 | 3.14958600  | -1.98806900 |
| H | 4.55083700 | 3.53502600  | -0.56364000 |
| C | 5.38758300 | 1.96575900  | -1.79785900 |
| H | 5.02050800 | 1.10755200  | -2.37791700 |
| H | 6.03137000 | 1.55329800  | -1.01038200 |
| C | 6.22859700 | 2.87687700  | -2.70326900 |
| H | 5.58956700 | 3.28618600  | -3.49863400 |
| H | 6.58118700 | 3.74061900  | -2.12156100 |
| C | 7.42904100 | 2.15906100  | -3.32961400 |
| H | 7.10637400 | 1.30888100  | -3.94325600 |
| H | 8.00755100 | 2.83311800  | -3.97184800 |
| H | 8.10600900 | 1.77142200  | -2.55827700 |

### TS<sub>12-13</sub>

|   |             |             |             |
|---|-------------|-------------|-------------|
| C | -0.68032000 | -1.18350400 | 0.00423800  |
| C | -2.31468700 | -2.77273500 | -0.38067100 |
| C | -1.52678500 | -3.24345900 | 0.61291800  |
| N | -0.52691600 | -2.28036800 | 0.83464900  |
| N | -1.80391900 | -1.51563300 | -0.74459700 |
| C | 0.55649900  | -2.57958800 | 1.75250100  |
| C | 1.58213200  | -3.44086900 | 1.29812300  |
| C | 0.49282500  | -2.11194100 | 3.08515700  |
| C | 2.55745200  | -3.84289800 | 2.22482100  |
| C | 1.49783000  | -2.54307400 | 3.96689100  |
| C | 2.51452200  | -3.40245900 | 3.54700600  |
| H | 3.35474500  | -4.50583000 | 1.90551100  |
| H | 1.48155400  | -2.20229100 | 4.99514500  |
| H | 3.27478400  | -3.72585500 | 4.25148900  |
| C | -2.43259000 | -0.73528800 | -1.79208200 |
| C | -3.67998700 | -0.12359100 | -1.52325100 |
| C | -1.83863600 | -0.70446500 | -3.07817700 |
| C | -4.31488100 | 0.55379400  | -2.57836200 |
| C | -2.51187600 | -0.00159000 | -4.08998900 |
| C | -3.73672300 | 0.62265800  | -3.84471600 |
| H | -5.27333400 | 1.02920400  | -2.40158300 |
| H | -2.08246300 | 0.04439000  | -5.08377600 |
| H | -4.24347500 | 1.15325200  | -4.64494600 |
| C | -0.64181900 | -1.21052100 | 3.57382300  |
| H | -0.97282800 | -0.58938100 | 2.73502600  |
| C | -1.84305600 | -2.05555900 | 4.06913600  |
| H | -2.23700900 | -2.70679000 | 3.28117100  |
| H | -1.55310000 | -2.68742500 | 4.91865500  |
| H | -2.65531600 | -1.39622100 | 4.39727500  |
| C | -0.19922900 | -0.22414700 | 4.67302300  |
| H | 0.03459900  | -0.72926100 | 5.61906700  |
| H | 0.67423100  | 0.35415900  | 4.35705300  |
| H | -1.01144600 | 0.48359000  | 4.86782700  |
| C | -4.38059000 | -0.22690600 | -0.16543200 |
| H | -3.65003900 | -0.58396500 | 0.56731700  |
| C | -4.91033100 | 1.13046100  | 0.34674900  |
| H | -5.32821600 | 1.00644700  | 1.35222100  |
| H | -4.11661600 | 1.87741300  | 0.40591700  |
| H | -5.71017900 | 1.52183600  | -0.29369300 |
| C | -5.54600100 | -1.24792900 | -0.22781600 |
| H | -6.31533500 | -0.91230100 | -0.93395300 |
| H | -5.21227900 | -2.24100200 | -0.54725600 |
| H | -6.01333300 | -1.34839000 | 0.75877200  |
| C | -0.55843600 | -1.48272000 | -3.39849100 |
| H | 0.04742000  | -1.52530600 | -2.48733600 |
| C | 0.31217800  | -0.82167800 | -4.48741700 |
| H | -0.16141900 | -0.86659900 | -5.47541800 |
| H | 0.52106900  | 0.22857900  | -4.25798800 |
| H | 1.27035400  | -1.34803000 | -4.56194400 |
| C | -0.90039400 | -2.93808500 | -3.81119000 |
| H | -1.45230400 | -3.46266700 | -3.02449600 |
| H | -1.51299900 | -2.94699900 | -4.72114500 |

|    |             |             |             |
|----|-------------|-------------|-------------|
| H  | 0.01840900  | -3.50157800 | -4.01403800 |
| C  | 1.65466300  | -3.95685100 | -0.14136300 |
| H  | 0.86003300  | -3.47313300 | -0.71772200 |
| C  | 2.99238600  | -3.58648500 | -0.82255400 |
| H  | 3.14015100  | -2.50191700 | -0.83033900 |
| H  | 3.84674600  | -4.04596200 | -0.31192900 |
| H  | 2.99573000  | -3.94040000 | -1.86073100 |
| C  | 1.41422300  | -5.48438900 | -0.20367200 |
| H  | 2.19051900  | -6.02947000 | 0.34637400  |
| H  | 0.44464400  | -5.75499800 | 0.22952400  |
| H  | 1.43169700  | -5.83124700 | -1.24369000 |
| Ni | 0.36037300  | 0.42405400  | -0.27110700 |
| C  | -2.15558300 | 3.51768000  | 0.90779500  |
| C  | -1.80184000 | 2.81570000  | 2.08531400  |
| C  | -2.20691700 | 3.31060400  | 3.33074100  |
| C  | -2.95003500 | 4.49051700  | 3.36697900  |
| C  | -3.29516000 | 5.17428500  | 2.18627500  |
| C  | -2.90419900 | 4.69652100  | 0.93362900  |
| C  | -0.95018700 | 1.67092600  | 0.42695300  |
| H  | -1.93853700 | 2.78528400  | 4.24340800  |
| H  | -3.26954100 | 4.89326000  | 4.32497500  |
| H  | -3.87327900 | 6.09265600  | 2.24974100  |
| H  | -3.16856200 | 5.22969900  | 0.02386600  |
| H  | 1.58625100  | -0.41639200 | -0.56571400 |
| N  | -1.07443100 | 1.68244000  | 1.75182400  |
| N  | -1.61636200 | 2.77154300  | -0.12813800 |
| C  | -1.77845300 | 3.09511800  | -1.52795000 |
| H  | -2.83538800 | 3.26940700  | -1.75940700 |
| H  | -1.21186600 | 3.99496000  | -1.80454200 |
| H  | -1.43182500 | 2.25447400  | -2.12800800 |
| H  | -1.56259300 | -4.15871200 | 1.17620900  |
| H  | -3.17802400 | -3.19509000 | -0.86162200 |
| C  | 2.22226700  | 1.23529500  | -0.74589600 |
| C  | 1.18490400  | 1.82300200  | -1.43579100 |
| H  | 0.93059700  | 2.85713900  | -1.22612500 |
| H  | 0.83948700  | 1.43394300  | -2.39601900 |
| C  | 3.47570900  | 1.40295400  | -0.31840700 |
| C  | 4.10733700  | 0.81200800  | 0.95555000  |
| C  | 4.48602100  | 1.97853800  | 1.90792700  |
| H  | 3.60331200  | 2.57962400  | 2.15361900  |
| H  | 4.88783300  | 1.57081100  | 2.84354100  |
| H  | 5.24767200  | 2.64498200  | 1.49120800  |
| C  | 5.38057200  | 0.00230400  | 0.61471600  |
| H  | 5.14661300  | -0.83295000 | -0.05633900 |
| H  | 6.14900800  | 0.61742500  | 0.13434800  |
| H  | 5.81767200  | -0.41490200 | 1.53005500  |
| C  | 3.14024200  | -0.09291500 | 1.72862300  |
| H  | 3.60753200  | -0.41846900 | 2.66523000  |
| H  | 2.21268500  | 0.43389500  | 1.97662000  |
| H  | 2.87494300  | -0.98629900 | 1.16320400  |
| C  | 4.42342600  | 2.26007200  | -1.17474600 |
| H  | 5.10167800  | 2.80659100  | -0.50907100 |
| H  | 5.07190600  | 1.57227900  | -1.74004300 |
| C  | 3.82227800  | 3.26851400  | -2.16079700 |
| H  | 3.17593100  | 3.97363200  | -1.62094800 |
| H  | 3.18002200  | 2.75263600  | -2.88489300 |
| C  | 4.90290000  | 4.05267000  | -2.91926900 |
| H  | 5.54457200  | 4.58086300  | -2.19955300 |
| H  | 5.55864300  | 3.34725600  | -3.45001200 |
| C  | 4.32244400  | 5.05952400  | -3.91813300 |
| H  | 3.68999000  | 5.79948300  | -3.41225300 |
| H  | 5.11480700  | 5.60364800  | -4.44510100 |
| H  | 3.70434900  | 4.55736400  | -4.67284800 |

### 13

|   |             |             |            |
|---|-------------|-------------|------------|
| C | -0.50906000 | -1.27335300 | 0.45565200 |
| C | -1.81457500 | -2.83795900 | 1.54461900 |
| C | -0.63540500 | -2.77096600 | 2.20961200 |
| N | 0.15901800  | -1.83181200 | 1.53474500 |
| N | -1.73553700 | -1.92542300 | 0.48199900 |
| C | 1.55308000  | -1.62881300 | 1.88092900 |
| C | 2.47109100  | -2.65130100 | 1.54020900 |
| C | 1.93602800  | -0.46997200 | 2.59755500 |
| C | 3.81552300  | -2.46989300 | 1.90456000 |
| C | 3.29495500  | -0.34070100 | 2.92899100 |
| C | 4.22568000  | -1.32323600 | 2.58418800 |
| H | 4.54230100  | -3.23745500 | 1.65935900 |
| H | 3.62567000  | 0.53657900  | 3.47102800 |

|    |             |             |             |
|----|-------------|-------------|-------------|
| H  | 5.26891200  | -1.19992600 | 2.85862900  |
| C  | -2.80236000 | -1.79146700 | -0.49027400 |
| C  | -4.01355800 | -1.16771100 | -0.10279900 |
| C  | -2.62920300 | -2.36373500 | -1.77282700 |
| C  | -5.04539000 | -1.10281700 | -1.05357100 |
| C  | -3.69070200 | -2.25775500 | -2.68655200 |
| C  | -4.88634100 | -1.63227000 | -2.33459700 |
| H  | -5.98297700 | -0.62923600 | -0.78536300 |
| H  | -3.58162300 | -2.68357600 | -3.67861600 |
| H  | -5.69708900 | -1.56626600 | -3.05358700 |
| C  | 0.91290200  | 0.56820800  | 3.05997100  |
| H  | 0.14984000  | 0.68706000  | 2.28312100  |
| C  | 0.20710400  | 0.09257900  | 4.35696100  |
| H  | -0.29896700 | -0.86875600 | 4.21877100  |
| H  | 0.92844100  | -0.01616300 | 5.17725700  |
| H  | -0.54702300 | 0.82811700  | 4.65987100  |
| C  | 1.51070900  | 1.97144000  | 3.27891600  |
| H  | 2.16810100  | 2.01242300  | 4.15744900  |
| H  | 2.07578000  | 2.30772700  | 2.40416400  |
| H  | 0.69518200  | 2.68376500  | 3.43742000  |
| C  | -4.24981400 | -0.61701500 | 1.30618300  |
| H  | -3.27449900 | -0.49727900 | 1.78936800  |
| C  | -4.93177100 | 0.76864100  | 1.30563000  |
| H  | -4.94862600 | 1.17144100  | 2.32440900  |
| H  | -4.39975500 | 1.48281200  | 0.67485000  |
| H  | -5.97133600 | 0.70784000  | 0.96103300  |
| C  | -5.09834000 | -1.60404900 | 2.14935800  |
| H  | -6.09303000 | -1.73093000 | 1.70465900  |
| H  | -4.63930700 | -2.59544900 | 2.22242800  |
| H  | -5.22941800 | -1.21573300 | 3.16615800  |
| C  | -1.37271500 | -3.13500100 | -2.18263700 |
| H  | -0.65729900 | -3.08888100 | -1.35656500 |
| C  | -0.68208000 | -2.50671100 | -3.41392200 |
| H  | -1.33233500 | -2.53047400 | -4.29650300 |
| H  | -0.41120100 | -1.46356000 | -3.21684700 |
| H  | 0.23294600  | -3.05958500 | -3.65833300 |
| C  | -1.69542700 | -4.62830200 | -2.43066900 |
| H  | -2.15326700 | -5.08749300 | -1.54714700 |
| H  | -2.38819400 | -4.75304100 | -3.27127000 |
| H  | -0.77793300 | -5.18029200 | -2.66743800 |
| C  | 2.04802600  | -3.96208500 | 0.86628800  |
| H  | 0.99183100  | -3.88341400 | 0.59143800  |
| C  | 2.82729700  | -4.25694700 | -0.43401100 |
| H  | 2.67186100  | -3.46975800 | -1.17700800 |
| H  | 3.90477400  | -4.34263500 | -0.25228200 |
| H  | 2.48706400  | -5.20648200 | -0.86452300 |
| C  | 2.18160300  | -5.14932500 | 1.85257500  |
| H  | 3.22749300  | -5.30206900 | 2.14375200  |
| H  | 1.60332100  | -4.98052500 | 2.76790500  |
| H  | 1.82218500  | -6.07459800 | 1.38674300  |
| Ni | 0.01570400  | 0.18943200  | -0.75785300 |
| C  | -2.75819900 | 3.14981600  | -0.44709100 |
| C  | -2.11142600 | 3.13320000  | 0.81331700  |
| C  | -2.46378600 | 4.07904800  | 1.78275100  |
| C  | -3.44748600 | 5.01716100  | 1.46769900  |
| C  | -4.08140000 | 5.01869100  | 0.21145800  |
| C  | -3.74831800 | 4.08025400  | -0.76843100 |
| C  | -1.24482000 | 1.49300000  | -0.32773300 |
| H  | -1.97614800 | 4.07643400  | 2.75405500  |
| H  | -3.73153800 | 5.76340000  | 2.20551100  |
| H  | -4.84158000 | 5.76542300  | -0.00307700 |
| H  | -4.23841800 | 4.08562800  | -1.73860300 |
| H  | 2.05441000  | -0.07204400 | -2.98173300 |
| N  | -1.19068500 | 2.09628800  | 0.85313500  |
| N  | -2.19818500 | 2.09586300  | -1.15161500 |
| C  | -2.60143800 | 1.69575500  | -2.48178900 |
| H  | -3.69070800 | 1.58227600  | -2.52980600 |
| H  | -2.29060200 | 2.43188200  | -3.23458000 |
| H  | -2.14423900 | 0.73391700  | -2.71274700 |
| H  | -0.27974800 | -3.29938800 | 3.07618000  |
| H  | -2.68638600 | -3.44292200 | 1.71400400  |
| C  | 2.02528300  | 0.71399300  | -2.22615100 |
| C  | 0.72827500  | 1.40200900  | -2.07612400 |
| H  | 0.79347400  | 2.43894800  | -1.74347500 |
| H  | 0.13077500  | 1.34732200  | -2.99183400 |
| C  | 3.18295000  | 0.98867700  | -1.55773800 |
| C  | 4.50986100  | 0.30628500  | -1.96776000 |
| C  | 5.62953100  | 0.51022500  | -0.92405200 |
| H  | 5.35590400  | 0.08589700  | 0.04857500  |
| H  | 6.54255300  | 0.00578000  | -1.26260400 |

|   |            |             |             |
|---|------------|-------------|-------------|
| H | 5.87672500 | 1.56682700  | -0.77885200 |
| C | 4.98508500 | 0.90868200  | -3.31658800 |
| H | 4.24552500 | 0.73463500  | -4.10563800 |
| H | 5.14302400 | 1.98990200  | -3.24102000 |
| H | 5.93297000 | 0.45054300  | -3.62868200 |
| C | 4.33223900 | -1.21628200 | -2.14785400 |
| H | 5.28174900 | -1.67362500 | -2.45424700 |
| H | 4.02038700 | -1.67763200 | -1.20668900 |
| C | 3.59021400 | -1.46379900 | -2.91364700 |
| C | 3.19904800 | 2.09955000  | -0.52333400 |
| H | 2.19875900 | 2.19241600  | -0.08779900 |
| H | 3.86466300 | 1.83761500  | 0.30715100  |
| C | 3.61549900 | 3.48350900  | -1.07347900 |
| H | 2.97508900 | 3.73617500  | -1.92945300 |
| H | 4.64302500 | 3.44288200  | -1.46130900 |
| C | 3.51965900 | 4.59309300  | -0.01779600 |
| H | 2.48965700 | 4.64012600  | 0.36189100  |
| H | 4.15115800 | 4.32998500  | 0.84341600  |
| C | 3.93203300 | 5.96916700  | -0.55155100 |
| H | 3.29669300 | 6.27345900  | -1.39251800 |
| H | 3.84936300 | 6.74004300  | 0.22340600  |
| H | 4.97035900 | 5.96328100  | -0.90672800 |

### TS<sub>13-P1</sub>

|   |             |             |             |
|---|-------------|-------------|-------------|
| C | -0.41015100 | -2.05088800 | 0.63778800  |
| C | -1.71739400 | -3.57554700 | 1.78374900  |
| C | -0.53087100 | -3.49585500 | 2.43988500  |
| N | 0.25729200  | -2.57016600 | 1.74085300  |
| N | -1.63900400 | -2.69642400 | 0.69130400  |
| C | 1.60357000  | -2.21063600 | 2.13107900  |
| C | 2.68644800  | -2.95524200 | 1.60902700  |
| C | 1.78885300  | -1.14586300 | 3.04164200  |
| C | 3.98123300  | -2.60328200 | 2.02152300  |
| C | 3.10490500  | -0.83597100 | 3.42125200  |
| C | 4.19055100  | -1.55361200 | 2.91755100  |
| H | 4.83168900  | -3.15761900 | 1.63830900  |
| H | 3.27800400  | -0.02178000 | 4.11641500  |
| H | 5.19949600  | -1.29626200 | 3.22458400  |
| C | -2.71990200 | -2.51259000 | -0.25155400 |
| C | -3.73834500 | -1.57936400 | 0.05312800  |
| C | -2.74448100 | -3.30060400 | -1.42374200 |
| C | -4.79773800 | -1.45068100 | -0.85961700 |
| C | -3.82538700 | -3.13037700 | -2.30414100 |
| C | -4.84215400 | -2.21594800 | -2.02686100 |
| H | -5.59497800 | -0.74529300 | -0.65328000 |
| H | -3.87144500 | -3.72362200 | -3.21160800 |
| H | -5.67194200 | -2.10172700 | -2.71768500 |
| C | 0.62094500  | -0.36107500 | 3.63940500  |
| H | -0.29357900 | -0.67081100 | 3.12333900  |
| C | 0.44754700  | -0.69830700 | 5.14108000  |
| H | 0.29475000  | -1.77281700 | 5.29850800  |
| H | 1.33091300  | -0.39696300 | 5.71711000  |
| H | -0.41888800 | -0.16607100 | 5.55109500  |
| C | 0.76628500  | 1.16236900  | 3.42432200  |
| H | 1.66229300  | 1.55565700  | 3.92039300  |
| H | 0.81258200  | 1.41045800  | 2.35888700  |
| H | -0.10110100 | 1.67869800  | 3.85420700  |
| C | -3.73069600 | -0.76501700 | 1.34771200  |
| H | -2.71037500 | -0.78389800 | 1.74528600  |
| C | -4.10498200 | 0.71665200  | 1.13097300  |
| H | -3.98333800 | 1.26952900  | 2.06926400  |
| H | -3.46568500 | 1.18780600  | 0.37963300  |
| H | -5.14939700 | 0.83272800  | 0.81688200  |
| C | -4.66480300 | -1.40799500 | 2.40396800  |
| H | -5.70310700 | -1.41642100 | 2.05013500  |
| H | -4.37610500 | -2.44140500 | 2.62584100  |
| H | -4.62994500 | -0.83711500 | 3.33937500  |
| C | -1.66410900 | -4.33476000 | -1.74233500 |
| H | -0.89032900 | -4.26315400 | -0.97164000 |
| C | -0.97946800 | -4.05415600 | -3.09905500 |
| H | -1.69040200 | -4.11654800 | -3.93160200 |
| H | -0.52797000 | -3.05623200 | -3.10624400 |
| H | -0.18646800 | -4.78919900 | -3.28155200 |
| C | -2.23655700 | -5.77169600 | -1.69699100 |
| H | -2.68092300 | -5.99156600 | -0.71954000 |
| H | -3.01260200 | -5.91496400 | -2.45838800 |
| H | -1.44246000 | -6.50435100 | -1.88410900 |
| C | 2.48946600  | -4.12641800 | 0.64586100  |



|    |             |             |             |
|----|-------------|-------------|-------------|
| H  | 1.42748100  | -4.17306700 | 0.38378800  |
| C  | 3.27377600  | -3.93053700 | -0.67145400 |
| H  | 2.98465500  | -2.99547000 | -1.16296400 |
| H  | 4.35580300  | -3.90309400 | -0.49729100 |
| H  | 3.06821900  | -4.75855800 | -1.36047000 |
| C  | 2.86436400  | -5.46992100 | 1.31642400  |
| H  | 3.92447500  | -5.48958100 | 1.59607800  |
| H  | 2.27493100  | -5.64006400 | 2.22466700  |
| H  | 2.68139100  | -6.30459700 | 0.62910700  |
| Ni | 0.28707800  | -0.79651700 | -0.57549600 |
| C  | -1.73293900 | 2.54580400  | -1.33316100 |
| C  | -0.90996500 | 2.91322900  | -0.23537500 |
| C  | -1.15816000 | 4.11562000  | 0.43996600  |
| C  | -2.21471100 | 4.91503200  | 0.00415700  |
| C  | -3.02041300 | 4.53522000  | -1.08529600 |
| C  | -2.79280400 | 3.34036300  | -1.77344900 |
| C  | -0.17006100 | 0.98531500  | -0.90967000 |
| H  | -0.53516200 | 4.40816900  | 1.28047700  |
| H  | -2.42193900 | 5.85238900  | 0.51422400  |
| H  | -3.83411400 | 5.18344800  | -1.40000100 |
| H  | -3.41636800 | 3.05031900  | -2.61508700 |
| H  | 3.09041300  | 0.15091400  | -0.52304100 |
| N  | 0.05833200  | 1.95314100  | -0.02292400 |
| N  | -1.24169900 | 1.32653700  | -1.75989500 |
| C  | -1.78900000 | 0.53455700  | -2.83942300 |
| H  | -2.86229200 | 0.36655000  | -2.69366900 |
| H  | -1.63779800 | 1.02525500  | -3.81080800 |
| H  | -1.29281600 | -0.43822200 | -2.84585600 |
| H  | -0.17423700 | -3.99830500 | 3.32202800  |
| H  | -2.59712600 | -4.16255600 | 1.98093100  |
| C  | 2.63758000  | 0.81701500  | -1.25450500 |
| C  | 1.35557100  | 0.32538000  | -1.81862300 |
| H  | 1.07556100  | 0.78317000  | -2.76616900 |
| H  | 1.41342800  | -0.78314800 | -2.03130700 |
| C  | 3.26351300  | 1.97502500  | -1.54882200 |
| C  | 4.63116600  | 2.29164400  | -0.88607600 |
| C  | 5.12063700  | 3.72626200  | -1.17850900 |
| H  | 4.44113700  | 4.48118800  | -0.76687400 |
| H  | 6.10142700  | 3.88017000  | -0.71271000 |
| H  | 5.23476400  | 3.91892600  | -2.25080800 |
| C  | 5.70015800  | 1.30435400  | -1.41633900 |
| H  | 5.42304700  | 0.26761100  | -1.19794400 |
| H  | 5.82078900  | 1.39503300  | -2.50240000 |
| H  | 6.67534800  | 1.50117200  | -0.95124200 |
| C  | 4.53027300  | 2.14799600  | 0.65141100  |
| H  | 5.48763900  | 2.41177500  | 1.12020100  |
| H  | 3.75611800  | 2.81052200  | 1.05346400  |
| H  | 4.28166800  | 1.12737000  | 0.95661700  |
| C  | 2.66778500  | 2.94350900  | -2.55580200 |
| H  | 1.57622100  | 2.85704100  | -2.54359600 |
| H  | 2.87683200  | 3.97690700  | -2.25868400 |
| C  | 3.16362300  | 2.73612300  | -4.00403100 |
| H  | 2.92842500  | 1.70944500  | -4.31964000 |
| H  | 4.25915300  | 2.81694400  | -4.04113400 |
| C  | 2.55004300  | 3.73227400  | -4.99677900 |
| H  | 1.45402600  | 3.65802000  | -4.95252600 |
| H  | 2.79607900  | 4.75602800  | -4.68072000 |
| C  | 3.01985700  | 3.51586000  | -6.43933100 |
| H  | 2.75613300  | 2.51214400  | -6.79580300 |
| H  | 2.56456000  | 4.24214300  | -7.12275800 |
| H  | 4.10915700  | 3.61869000  | -6.52170600 |

## P1

|   |             |             |             |
|---|-------------|-------------|-------------|
| C | -1.43731900 | 0.29935000  | 0.12658000  |
| C | -3.34101300 | -0.69523600 | 0.08965900  |
| C | -3.62128400 | 0.68554100  | -0.03083000 |
| C | -4.39167000 | -1.61983300 | 0.09707800  |
| C | -4.92137800 | 1.18215100  | -0.14302600 |
| C | -5.69264000 | -1.13487500 | -0.01491600 |
| H | -4.18495100 | -2.68186000 | 0.18857800  |
| C | -5.95362000 | 0.24445600  | -0.13293100 |
| H | -5.12830300 | 2.24499200  | -0.23220500 |
| H | -6.52622400 | -1.83186200 | -0.01112200 |
| H | -6.98163300 | 0.58622800  | -0.21716900 |
| C | -2.17149400 | 2.74095300  | -0.08369300 |
| H | -2.65163800 | 3.14982500  | -0.97997100 |
| H | -2.58642600 | 3.24659500  | 0.79669500  |
| H | -1.10340000 | 2.95525600  | -0.13652000 |

|   |             |             |             |
|---|-------------|-------------|-------------|
| N | -1.97214600 | -0.89742600 | 0.18580900  |
| C | 0.03722300  | 0.59669000  | 0.20887200  |
| C | 0.87609700  | -0.65560100 | 0.30786500  |
| H | 0.21130100  | 1.24103000  | 1.08713200  |
| H | 0.33462700  | 1.20411500  | -0.65749800 |
| C | 2.13934300  | -0.79980900 | -0.12405500 |
| H | 0.35677500  | -1.48690900 | 0.76819600  |
| N | -2.38232900 | 1.30866800  | -0.00743100 |
| C | 2.88381300  | -2.14519400 | -0.00764000 |
| C | 2.10002000  | -3.19084600 | 0.80857000  |
| C | 3.10447400  | -2.72309000 | -1.42868800 |
| C | 4.25827900  | -1.94698400 | 0.67543000  |
| H | 1.90215100  | -2.84118300 | 1.82805200  |
| H | 1.14135300  | -3.44009800 | 0.34175400  |
| H | 2.68350400  | -4.11630400 | 0.87928900  |
| C | 3.69309600  | -2.05218200 | -2.06399300 |
| H | 3.64290600  | -3.67739800 | -1.37228600 |
| H | 2.14484000  | -2.90314100 | -1.92610500 |
| H | 4.78924900  | -2.90463200 | 0.73883600  |
| H | 4.90173200  | -1.25366800 | 0.12339000  |
| H | 4.13990300  | -1.56145200 | 1.69495600  |
| C | 2.88883500  | 0.35715100  | -0.77478900 |
| C | 3.41414900  | 1.41636800  | 0.21747400  |
| H | 2.23585900  | 0.85968900  | -1.50270700 |
| H | 3.73734400  | -0.01846600 | -1.35771700 |
| C | 4.16744900  | 2.56196900  | -0.47185900 |
| H | 2.57447800  | 1.82815000  | 0.79374200  |
| H | 4.07473300  | 0.93651500  | 0.95139900  |
| C | 4.68068000  | 3.62139100  | 0.50943000  |
| H | 5.01309000  | 2.14890600  | -1.04018400 |
| H | 3.50820100  | 3.03664000  | -1.21309200 |
| H | 5.21845700  | 4.42261600  | -0.01040700 |
| H | 3.85398800  | 4.08114400  | 1.06531000  |
| H | 5.36664800  | 3.18144300  | 1.24381400  |

## 14

|   |             |             |             |
|---|-------------|-------------|-------------|
| C | -1.83506900 | -0.73891000 | 0.03790100  |
| C | -3.28133800 | -2.30936000 | -0.85479600 |
| C | -3.15930300 | -2.58470200 | 0.46857700  |
| N | -2.28124100 | -1.62886400 | 1.00604000  |
| N | -2.47662600 | -1.18781400 | -1.11031900 |
| C | -1.97173200 | -1.56778400 | 2.42013000  |
| C | -0.84974100 | -2.27286400 | 2.91249700  |
| C | -2.83978600 | -0.84569700 | 3.26955200  |
| C | -0.61796300 | -2.24263100 | 4.29679600  |
| C | -2.56146100 | -0.84763000 | 4.64589500  |
| C | -1.46368600 | -1.53967000 | 5.15645100  |
| H | 0.23465500  | -2.77331600 | 4.70439300  |
| H | -3.21264500 | -0.30235900 | 5.32111900  |
| H | -1.26554100 | -1.53128000 | 6.22387300  |
| C | -2.40477500 | -0.54914500 | -2.40750800 |
| C | -3.31739800 | 0.48993100  | -2.70185600 |
| C | -1.45468700 | -1.00815400 | -3.34921500 |
| C | -3.25701700 | 1.07109400  | -3.97870600 |
| C | -1.44508100 | -0.39942600 | -4.61437000 |
| C | -2.33467400 | 0.62945900  | -4.92752600 |
| H | -3.94167800 | 1.87448100  | -4.22971600 |
| H | -0.72804300 | -0.73029200 | -5.35712600 |
| H | -2.30666800 | 1.08866000  | -5.91087800 |
| C | -4.06736400 | -0.09737100 | 2.74812800  |
| H | -4.03561100 | -0.11704900 | 1.65438600  |
| C | -5.37508900 | -0.79670900 | 3.19125800  |
| H | -5.41015400 | -1.83495500 | 2.84188400  |
| H | -5.46610300 | -0.80745400 | 4.28408600  |
| H | -6.24692400 | -0.27003400 | 2.78499300  |
| C | -4.06664300 | 1.38847900  | 3.17231000  |
| H | -4.13219600 | 1.49931700  | 4.26108300  |
| H | -3.15598200 | 1.89064900  | 2.83129100  |
| H | -4.92845700 | 1.90560800  | 2.73358200  |
| C | -4.35128100 | 0.98955800  | -1.69202900 |
| H | -4.26742200 | 0.37527900  | -0.79004600 |
| C | -4.07271400 | 2.45238100  | -1.27371900 |
| H | -4.81325200 | 2.78295200  | -0.53526800 |
| H | -3.07733900 | 2.54687900  | -0.82561400 |
| H | -4.12918300 | 3.13061000  | -2.13374400 |
| C | -5.79355800 | 0.82989900  | -2.22761300 |
| H | -5.96293700 | 1.45034700  | -3.11555700 |
| H | -6.00511900 | -0.21058700 | -2.49946600 |
| H | -6.51703500 | 1.13771400  | -1.46343100 |
| C | -0.47826300 | -2.14039200 | -3.03208200 |

|    |             |             |             |
|----|-------------|-------------|-------------|
| H  | -0.41648700 | -2.23134600 | -1.94218500 |
| C  | 0.94973400  | -1.85752900 | -3.54818200 |
| H  | 1.00833700  | -1.93068800 | -4.64116300 |
| H  | 1.28556200  | -0.85667700 | -3.25658100 |
| H  | 1.64997900  | -2.57986400 | -3.11812200 |
| C  | -0.99225400 | -3.49181600 | -3.58762800 |
| H  | -1.97342600 | -3.75184000 | -3.17505400 |
| H  | -1.08407900 | -3.45159100 | -4.68008300 |
| H  | -0.29188600 | -4.29586600 | -3.33376000 |
| C  | 0.06978800  | -3.07494500 | 1.99173100  |
| H  | -0.01821400 | -2.65220300 | 0.98483100  |
| C  | 1.55685800  | -2.98278900 | 2.39412300  |
| H  | 1.86779800  | -1.94101700 | 2.52863100  |
| H  | 1.76236900  | -3.52354800 | 3.32602600  |
| H  | 2.17751600  | -3.41956900 | 1.60600900  |
| C  | -0.37116800 | -4.55875700 | 1.92037500  |
| H  | -0.31265600 | -5.02800000 | 2.91042700  |
| H  | -1.40026100 | -4.65867600 | 1.55854400  |
| H  | 0.28391500  | -5.11493100 | 1.23982800  |
| Ni | -0.66813400 | 0.77290600  | 0.24120600  |
| C  | 5.17061800  | -1.37783400 | -0.41781400 |
| C  | 4.56614800  | -2.60034800 | -0.80337000 |
| C  | 5.36975200  | -3.70910900 | -1.09887100 |
| C  | 6.75024200  | -3.56342500 | -0.99969000 |
| C  | 7.33450500  | -2.33925300 | -0.61399600 |
| C  | 6.55563300  | -1.22346000 | -0.31574500 |
| C  | 2.97055200  | -1.22235500 | -0.46096700 |
| H  | 4.91585900  | -4.64991900 | -1.39589900 |
| H  | 7.39557000  | -4.40858000 | -1.22344400 |
| H  | 8.41651600  | -2.26459700 | -0.54764300 |
| H  | 7.00948300  | -0.28226100 | -0.01864100 |
| H  | 1.99603900  | -0.75653600 | -0.35581300 |
| N  | 3.18347200  | -2.46718600 | -0.81896200 |
| N  | 4.11528500  | -0.50636400 | -0.20419900 |
| C  | 4.19514700  | 0.88040200  | 0.21525600  |
| H  | 4.65018800  | 0.96066600  | 1.20891000  |
| H  | 4.79451200  | 1.46152900  | -0.49457800 |
| H  | 3.18798700  | 1.30188500  | 0.25207600  |
| H  | -3.60815400 | -3.35047700 | 1.07646400  |
| H  | -3.85699600 | -2.78650400 | -1.62824300 |
| C  | 0.36160800  | 2.30341500  | 0.60831600  |
| C  | 0.02053000  | 1.65923700  | 1.80771400  |
| C  | 0.90407700  | 3.40452400  | 0.07213500  |
| C  | 0.91707000  | 3.68035100  | -1.44147500 |
| C  | -0.07913500 | 4.82255600  | -1.76282700 |
| H  | 0.16988700  | 5.74547300  | -1.22688500 |
| H  | -0.07300600 | 5.05197600  | -2.83669500 |
| H  | -1.09827200 | 4.53483300  | -1.48068400 |
| C  | 0.49734300  | 2.43577000  | -2.24332100 |
| H  | 1.18194700  | 1.59884500  | -2.06355100 |
| H  | -0.51341900 | 2.10650000  | -1.97238700 |
| H  | 0.49819500  | 2.65140900  | -3.31939100 |
| C  | 2.32720200  | 4.10259000  | -1.91831500 |
| H  | 2.31880500  | 4.31115500  | -2.99574500 |
| H  | 2.68158400  | 5.00728100  | -1.41270300 |
| H  | 3.05950800  | 3.30652800  | -1.73831000 |
| C  | 1.47363000  | 4.47926600  | 1.00457600  |
| H  | 1.55826000  | 5.43891100  | 0.47781900  |
| H  | 0.76254300  | 4.64553100  | 1.82512600  |
| C  | 2.84207600  | 4.13909100  | 1.62394100  |
| H  | 3.58070000  | 3.97930900  | 0.82520900  |
| H  | 2.75600800  | 3.18660300  | 2.16499300  |
| C  | 3.35976100  | 5.22145800  | 2.58104700  |
| H  | 3.44501000  | 6.17494500  | 2.03993700  |
| H  | 2.61544500  | 5.38746300  | 3.37293700  |
| C  | 4.71074000  | 4.87309900  | 3.21538000  |
| H  | 5.48518600  | 4.73614800  | 2.44999500  |
| H  | 5.05193900  | 5.66300800  | 3.89475900  |
| H  | 4.64842000  | 3.94203400  | 3.79270000  |
| H  | 0.74167600  | 1.03523900  | 2.34455100  |
| H  | -0.79173900 | 2.02952500  | 2.44145900  |

## TS<sub>14-15</sub>

|   |            |             |             |
|---|------------|-------------|-------------|
| C | 0.42547300 | -1.46914600 | 0.04940700  |
| C | 0.88584600 | -3.66984000 | -0.48852500 |
| C | 1.71516000 | -3.32798300 | 0.52530000  |
| N | 1.44103400 | -1.98545300 | 0.84224300  |

|    |             |             |             |
|----|-------------|-------------|-------------|
| N  | 0.09257900  | -2.54425000 | -0.76696800 |
| C  | 2.16082700  | -1.29834700 | 1.89470000  |
| C  | 3.49737900  | -0.89570200 | 1.65425500  |
| C  | 1.54307100  | -1.13665000 | 3.15719500  |
| C  | 4.20017200  | -0.30054800 | 2.71493500  |
| C  | 2.29193600  | -0.53270300 | 4.18041900  |
| C  | 3.60568800  | -0.11630400 | 3.96407100  |
| H  | 5.22470600  | 0.01795300  | 2.55912400  |
| H  | 1.84431300  | -0.40009400 | 5.15934700  |
| H  | 4.16932200  | 0.34278100  | 4.77051200  |
| C  | -0.98320500 | -2.59606700 | -1.74004800 |
| C  | -2.15685500 | -3.31374200 | -1.40244700 |
| C  | -0.80779200 | -1.98886800 | -3.00647100 |
| C  | -3.17075300 | -3.40333000 | -2.36981100 |
| C  | -1.86033200 | -2.10312000 | -3.92982100 |
| C  | -3.02825100 | -2.80019000 | -3.61848600 |
| H  | -4.08010900 | -3.94798700 | -2.13998800 |
| H  | -1.76233300 | -1.64254600 | -4.90519500 |
| H  | -3.82537100 | -2.87584300 | -4.35168000 |
| C  | 0.13910800  | -1.66244800 | 3.46105200  |
| H  | -0.35102100 | -1.89315400 | 2.51110900  |
| C  | 0.21836200  | -2.97394000 | 4.28165000  |
| H  | 0.79353200  | -3.74126800 | 3.75133600  |
| H  | 0.70090100  | -2.80109100 | 5.25128700  |
| H  | -0.78743600 | -3.36910500 | 4.46853600  |
| C  | -0.74385700 | -0.62081600 | 4.18253800  |
| H  | -0.36013900 | -0.37921300 | 5.18067100  |
| H  | -0.80849000 | 0.30894400  | 3.60763600  |
| H  | -1.75940900 | -1.01427700 | 4.30837900  |
| C  | -2.34264300 | -4.02042500 | -0.05550000 |
| H  | -1.55996800 | -3.66722100 | 0.62438600  |
| C  | -3.70168500 | -3.70350300 | 0.61085900  |
| H  | -3.74672000 | -4.17123700 | 1.60162500  |
| H  | -3.84810800 | -2.62669500 | 0.73496800  |
| H  | -4.54128100 | -4.09546100 | 0.02540800  |
| C  | -2.18176900 | -5.55383200 | -0.21016900 |
| H  | -2.95937100 | -5.95976500 | -0.86833600 |
| H  | -1.21039100 | -5.82045700 | -0.63986200 |
| H  | -2.26999500 | -6.04888100 | 0.76436700  |
| C  | 0.49320100  | -1.28474800 | -3.39629100 |
| H  | 0.90130100  | -0.79391000 | -2.50774100 |
| C  | 0.29848000  | -0.17126600 | -4.44350300 |
| H  | 0.05233900  | -0.57348000 | -5.43475300 |
| H  | -0.48797700 | 0.52619800  | -4.13979100 |
| H  | 1.22515700  | 0.40277900  | -4.53088300 |
| C  | 1.53608600  | -2.31535400 | -3.90140800 |
| H  | 1.75473100  | -3.07863700 | -3.14651500 |
| H  | 1.17303800  | -2.82363900 | -4.80381800 |
| H  | 2.47505000  | -1.80721700 | -4.15076400 |
| C  | 4.20606100  | -1.13892800 | 0.31894200  |
| H  | 3.44005700  | -1.34355500 | -0.43637000 |
| C  | 5.01463800  | 0.08371400  | -0.16725100 |
| H  | 4.40320500  | 0.98736700  | -0.20273000 |
| H  | 5.88067600  | 0.27822800  | 0.47697900  |
| H  | 5.39539200  | -0.10469300 | -1.17738800 |
| C  | 5.14099400  | -2.37301700 | 0.40693300  |
| H  | 5.93633100  | -2.20149200 | 1.14270600  |
| H  | 4.60511700  | -3.28150100 | 0.70030300  |
| H  | 5.61366000  | -2.55785600 | -0.56482000 |
| Ni | -0.38632000 | 0.26273700  | -0.00968200 |
| C  | 2.71320100  | 3.00149700  | -0.34019100 |
| C  | 2.57464200  | 2.53620700  | -1.67217600 |
| C  | 3.43794400  | 3.01715100  | -2.66572100 |
| C  | 4.41145400  | 3.94570000  | -2.30268800 |
| C  | 4.53596100  | 4.39622300  | -0.97361100 |
| C  | 3.68905600  | 3.92961400  | 0.03238300  |
| C  | 1.04873200  | 1.50283600  | -0.51799600 |
| H  | 3.34012300  | 2.66995000  | -3.69058100 |
| H  | 5.09027300  | 4.33321500  | -3.05805000 |
| H  | 5.30642100  | 5.12189900  | -0.72651200 |
| H  | 3.78959300  | 4.27761700  | 1.05700600  |
| H  | -0.45399400 | 1.70673800  | -0.32549000 |
| N  | 1.53422500  | 1.62698800  | -1.74965000 |
| N  | 1.73011800  | 2.34124900  | 0.37281600  |
| C  | 1.48306400  | 2.48728600  | 1.79218700  |
| H  | 2.31929700  | 2.09708400  | 2.38281500  |
| H  | 1.32643300  | 3.54208800  | 2.04814500  |
| H  | 0.58320900  | 1.92403800  | 2.04716600  |
| H  | 2.46354400  | -3.89371300 | 1.04969600  |
| H  | 0.77614700  | -4.59026200 | -1.03330200 |

|   |             |             |             |
|---|-------------|-------------|-------------|
| C | -2.16539900 | 1.15620500  | 0.09015300  |
| C | -2.22451800 | -0.16817700 | 0.54608800  |
| C | -2.95774200 | 2.19696100  | -0.20040200 |
| C | -2.50716400 | 3.51927000  | -0.87617600 |
| C | -3.69216000 | 4.47082700  | -1.16046000 |
| H | -4.24084400 | 4.74537000  | -0.25307700 |
| H | -3.30816800 | 5.39690900  | -1.60381600 |
| H | -4.40373500 | 4.04083200  | -1.87417400 |
| C | -1.84005500 | 3.22042100  | -2.24110500 |
| H | -0.93788100 | 2.61204200  | -2.14794200 |
| H | -2.53797600 | 2.68821800  | -2.89885300 |
| H | -1.55883200 | 4.15881300  | -2.73692500 |
| C | -1.51905900 | 4.28494000  | 0.03604000  |
| H | -1.20408500 | 5.22019500  | -0.44423400 |
| H | -1.98690000 | 4.53782700  | 0.99519800  |
| H | -0.61880600 | 3.70215600  | 0.24302500  |
| C | -4.42484200 | 2.02288600  | 0.20577500  |
| H | -5.09001600 | 2.51936800  | -0.50942600 |
| H | -4.67136300 | 0.95578000  | 0.16904900  |
| C | -4.74359900 | 2.53839000  | 1.62439900  |
| H | -4.46738300 | 3.59846600  | 1.71235900  |
| H | -4.11195500 | 1.99816300  | 2.34354000  |
| C | -6.21997100 | 2.36756100  | 2.00619500  |
| H | -6.84612600 | 2.91344700  | 1.28590600  |
| H | -6.49787000 | 1.30822800  | 1.90788100  |
| C | -6.53742400 | 2.84944200  | 3.42605500  |
| H | -6.30271500 | 3.91457200  | 3.54502800  |
| H | -7.59787700 | 2.71349200  | 3.66872100  |
| H | -5.95139000 | 2.29759900  | 4.17162600  |
| H | -2.25415200 | -0.38857000 | 1.61515000  |
| H | -2.69718500 | -0.92072600 | -0.08359500 |

## 15

|   |             |             |             |
|---|-------------|-------------|-------------|
| C | 0.08302700  | 1.32732800  | -0.25157200 |
| C | 0.60950300  | 3.07936800  | -1.66378100 |
| C | -0.60740100 | 3.34690600  | -1.13928200 |
| N | -0.93302800 | 2.27368000  | -0.29133000 |
| N | 1.03614500  | 1.85679400  | -1.11680600 |
| C | -2.20481100 | 2.24870100  | 0.40391300  |
| C | -3.37759000 | 1.97369400  | -0.34205000 |
| C | -2.25278200 | 2.61735000  | 1.76867900  |
| C | -4.60870300 | 2.04602800  | 0.33043600  |
| C | -3.51054000 | 2.66519000  | 2.39189100  |
| C | -4.67777200 | 2.38071500  | 1.68320800  |
| H | -5.52244200 | 1.84070900  | -0.21577900 |
| H | -3.57531300 | 2.94741300  | 3.43716800  |
| H | -5.64118800 | 2.43116300  | 2.18113000  |
| C | 2.35494900  | 1.33638800  | -1.43801000 |
| C | 3.48131200  | 1.93670300  | -0.82126700 |
| C | 2.48403600  | 0.33617000  | -2.43255800 |
| C | 4.75557400  | 1.48897300  | -1.20561300 |
| C | 3.78490000  | -0.07419500 | -2.77179500 |
| C | 4.90796700  | 0.49095900  | -2.16694000 |
| H | 5.63483900  | 1.93014400  | -0.74953200 |
| H | 3.91753400  | -0.84064900 | -3.52516800 |
| H | 5.90160400  | 0.15865900  | -2.45137600 |
| C | -1.00891700 | 3.04663900  | 2.54762100  |
| H | -0.12941000 | 2.75427700  | 1.96807800  |
| C | -0.97589000 | 4.58699800  | 2.70743800  |
| H | -0.99298100 | 5.08828500  | 1.73304300  |
| H | -1.83939100 | 4.94103000  | 3.28354100  |
| H | -0.06576400 | 4.89722900  | 3.23489600  |
| C | -0.89640500 | 2.35283600  | 3.92257700  |
| H | -1.70755300 | 2.64899000  | 4.59789300  |
| H | -0.92200600 | 1.26336600  | 3.81698300  |
| H | 0.04888100  | 2.62779200  | 4.40509100  |
| C | 3.36644500  | 3.07878900  | 0.19412100  |
| H | 2.33201800  | 3.11018400  | 0.55277800  |
| C | 4.27774600  | 2.88510600  | 1.42844900  |
| H | 4.07555100  | 3.67227600  | 2.16461500  |
| H | 4.10950600  | 1.91739300  | 1.90872200  |
| H | 5.33877400  | 2.95424800  | 1.16200100  |
| C | 3.68360200  | 4.44323400  | -0.46970600 |
| H | 4.71531600  | 4.46007400  | -0.84090000 |
| H | 3.02028900  | 4.65118100  | -1.31501900 |
| H | 3.57131700  | 5.25635200  | 0.25747600  |
| C | 1.27630000  | -0.23923800 | -3.17487500 |
| H | 0.43160100  | -0.28912700 | -2.48099400 |

|   |             |             |             |
|---|-------------|-------------|-------------|
| C | 1.49245400  | -1.68293100 | -3.66975500 |
| H | 2.22601300  | -1.73852000 | -4.48460600 |
| H | 1.81355400  | -2.33886500 | -2.85553300 |
| H | 0.54343600  | -2.07501300 | -4.04739800 |
| C | 0.88639800  | 0.67171700  | -4.36814700 |
| H | 0.64402500  | 1.69008000  | -4.04641800 |
| H | 1.70525600  | 0.73055900  | -5.09666900 |
| H | 0.00683600  | 0.26117700  | -4.87783200 |
| C | -3.35651500 | 1.67165500  | -1.84362200 |
| H | -2.33079100 | 1.40849200  | -2.12216200 |
| C | -4.25522800 | 0.47804500  | -2.23403600 |
| H | -4.00473600 | -0.42105700 | -1.66842200 |
| H | -5.31761800 | 0.70209000  | -2.07769200 |
| H | -4.12315400 | 0.25148600  | -3.29808200 |
| C | -3.77840200 | 2.92052000  | -2.66085400 |
| H | -4.81120600 | 3.20410500  | -2.42396100 |
| H | -3.14014900 | 3.78676400  | -2.45900400 |
| H | -3.72504700 | 2.70378800  | -3.73415500 |
| N | 0.19257000  | -0.26530900 | 0.76822300  |
| C | -3.03101700 | -2.51314100 | -0.55160100 |
| C | -2.06405200 | -2.68613900 | -1.57213100 |
| C | -2.34417900 | -3.53718700 | -2.64862600 |
| C | -3.57566300 | -4.19159700 | -2.67604100 |
| C | -4.52441700 | -4.00931200 | -1.65230100 |
| C | -4.26681700 | -3.16439600 | -0.57053200 |
| C | -1.16831900 | -1.30020800 | -0.13380000 |
| H | -1.61061200 | -3.68330800 | -3.43728500 |
| H | -3.80955900 | -4.85878300 | -3.50205600 |
| H | -5.47326800 | -4.53741300 | -1.70211300 |
| H | -5.00075000 | -3.02712400 | 0.21973900  |
| H | 0.61641000  | -0.61477100 | 3.41103900  |
| N | -0.94273700 | -1.92250400 | -1.28961000 |
| N | -2.45200900 | -1.62273200 | 0.33705900  |
| C | -3.07820100 | -1.17053300 | 1.55851100  |
| H | -4.03446500 | -0.67770200 | 1.34988300  |
| H | -3.26004200 | -2.00757400 | 2.24551200  |
| H | -2.41762200 | -0.44973800 | 2.04264300  |
| H | -1.27302400 | 4.17880600  | -1.27967300 |
| H | 1.21372000  | 3.62464600  | -2.36586800 |
| C | 1.20466200  | -0.79754300 | 2.51602800  |
| C | 1.75595200  | 0.34649600  | 1.86959100  |
| C | 1.13982500  | -2.06798100 | 1.94289200  |
| C | 0.44083400  | -3.23150900 | 2.69161300  |
| C | 1.52427500  | -4.16272300 | 3.30000700  |
| H | 2.20263200  | -3.61270600 | 3.96257100  |
| H | 1.04082600  | -4.95056900 | 3.89068100  |
| H | 2.12245000  | -4.65612500 | 2.52757800  |
| C | -0.43883300 | -4.08708800 | 1.75112000  |
| H | -1.29739300 | -3.52348500 | 1.38434100  |
| H | 0.11208300  | -4.44912400 | 0.87867400  |
| H | -0.80933300 | -4.96581500 | 2.29385400  |
| C | -0.44357400 | -2.74882600 | 3.86014300  |
| H | -0.97512400 | -3.60445700 | 4.29224200  |
| H | 0.14662000  | -2.29510700 | 4.66498700  |
| H | -1.19455000 | -2.02320400 | 3.53338000  |
| C | 2.11185800  | -2.45441400 | 0.82328900  |
| H | 1.82645200  | -3.42923900 | 0.41601400  |
| H | 2.01534500  | -1.75905900 | -0.02088900 |
| C | 3.60279100  | -2.50213900 | 1.23340800  |
| H | 3.73460800  | -3.15249000 | 2.10612200  |
| H | 3.93201500  | -1.50436100 | 1.54905700  |
| C | 4.50549200  | -2.99806900 | 0.09572100  |
| H | 4.18534000  | -4.00528600 | -0.20794000 |
| H | 4.36721700  | -2.35435400 | -0.78323000 |
| C | 5.98932800  | -3.02817500 | 0.47809400  |
| H | 6.16444100  | -3.68268000 | 1.34120800  |
| H | 6.60928200  | -3.39533200 | -0.34837900 |
| H | 6.34887700  | -2.02649100 | 0.74518500  |
| H | 1.71514700  | 1.28967900  | 2.40893400  |
| H | 2.62489400  | 0.24408500  | 1.22650200  |

## TS15-16

|   |            |             |             |
|---|------------|-------------|-------------|
| C | 1.16857400 | -0.87501600 | 0.05420800  |
| C | 2.79492300 | -1.58147800 | 1.51010800  |
| C | 2.08372600 | -2.67604900 | 1.14043800  |
| N | 1.08059600 | -2.23890500 | 0.25922000  |
| N | 2.23365700 | -0.48283700 | 0.84306500  |
| C | 0.15605100 | -3.15614700 | -0.38099900 |

|   |             |             |             |
|---|-------------|-------------|-------------|
| C | -0.96583900 | -3.62048700 | 0.34812000  |
| C | 0.44935900  | -3.60959300 | -1.68822500 |
| C | -1.80975600 | -4.54776400 | -0.28464100 |
| C | -0.43291700 | -4.53346900 | -2.27216600 |
| C | -1.55177200 | -4.99680200 | -1.58096100 |
| H | -2.67877200 | -4.92010900 | 0.24477500  |
| H | -0.23280100 | -4.89868200 | -3.27370000 |
| H | -2.21944900 | -5.71406000 | -2.04820000 |
| C | 2.81174200  | 0.84915300  | 0.90716800  |
| C | 3.88752100  | 1.14894400  | 0.03862900  |
| C | 2.33226300  | 1.76656700  | 1.87052200  |
| C | 4.47619500  | 2.41865300  | 0.14579500  |
| C | 2.95943300  | 3.02157900  | 1.93130100  |
| C | 4.01637300  | 3.34695400  | 1.07974200  |
| H | 5.30175500  | 2.67957100  | -0.50746200 |
| H | 2.61508500  | 3.75195400  | 2.65357800  |
| H | 4.48427000  | 4.32408600  | 1.14764300  |
| C | 1.70633800  | -3.18794100 | -2.45158100 |
| H | 2.18918400  | -2.37802600 | -1.89640600 |
| C | 2.71342500  | -4.36161100 | -2.53285300 |
| H | 2.98471800  | -4.72515000 | -1.53510500 |
| H | 2.29212600  | -5.20398200 | -3.09445400 |
| H | 3.63044300  | -4.04147200 | -3.04152300 |
| C | 1.38774900  | -2.63849400 | -3.85982000 |
| H | 0.92633700  | -3.40017500 | -4.49909800 |
| H | 0.71382700  | -1.77809700 | -3.80170000 |
| H | 2.31158300  | -2.31009500 | -4.35008200 |
| C | 4.45232400  | 0.13808300  | -0.96183800 |
| H | 3.77593400  | -0.72264200 | -0.99648000 |
| C | 4.53414200  | 0.70713500  | -2.39607700 |
| H | 4.88421700  | -0.06981500 | -3.08635200 |
| H | 3.55600800  | 1.05668300  | -2.73812200 |
| H | 5.23875100  | 1.54448500  | -2.45905100 |
| C | 5.83728400  | -0.37846600 | -0.49945100 |
| H | 6.56527300  | 0.44035700  | -0.45650100 |
| H | 5.78596100  | -0.83350200 | 0.49636000  |
| H | 6.21691600  | -1.13185300 | -1.19992600 |
| C | 1.21995800  | 1.40609700  | 2.85564100  |
| H | 0.59412400  | 0.63585900  | 2.39576800  |
| C | 0.27632600  | 2.58707200  | 3.15960900  |
| H | 0.77535300  | 3.38585800  | 3.72231200  |
| H | -0.13613300 | 3.00397700  | 2.23700000  |
| H | -0.56273700 | 2.23138400  | 3.76749600  |
| C | 1.82089100  | 0.84219500  | 4.16828100  |
| H | 2.43426100  | -0.04790000 | 3.98679200  |
| H | 2.45214900  | 1.59143700  | 4.66245900  |
| H | 1.01886600  | 0.56287500  | 4.86195900  |
| C | -1.24885600 | -3.18802000 | 1.78902400  |
| H | -0.76114200 | -2.22049200 | 1.95035700  |
| C | -2.75371800 | -2.99575500 | 2.07922400  |
| H | -3.23110500 | -2.34505400 | 1.34314500  |
| H | -3.28795600 | -3.95377500 | 2.09597100  |
| H | -2.88158200 | -2.53387000 | 3.06405500  |
| C | -0.66049200 | -4.20727500 | 2.79926700  |
| H | -1.12774000 | -5.19100600 | 2.66798400  |
| H | 0.42072900  | -4.33074600 | 2.68441100  |
| H | -0.85426300 | -3.87397900 | 3.82552100  |
| N | 0.34782200  | 0.25309900  | -1.17667300 |
| C | -3.46185100 | -0.04930500 | -0.03612000 |
| C | -2.86884400 | 0.54142200  | 1.10663800  |
| C | -3.67794000 | 0.95969200  | 2.16970700  |
| C | -5.05547900 | 0.77499900  | 2.06216700  |
| C | -5.62901500 | 0.18464900  | 0.91958300  |
| C | -4.84115000 | -0.23914500 | -0.15172500 |
| C | -1.24223900 | 0.08190000  | -0.24182200 |
| H | -3.23459000 | 1.41730800  | 3.04962500  |
| H | -5.70343500 | 1.09395800  | 2.87440900  |
| H | -6.70725800 | 0.05883500  | 0.86863700  |
| H | -5.28711100 | -0.69234300 | -1.03276100 |
| H | -1.27157800 | 1.51137800  | -3.76117600 |
| N | -1.48979000 | 0.58653300  | 0.95119500  |
| N | -2.40328200 | -0.34689300 | -0.87992600 |
| C | -2.52062100 | -0.98409300 | -2.17630700 |
| H | -3.21264600 | -0.42549200 | -2.81549800 |
| H | -1.53772300 | -0.99670800 | -2.64963100 |
| H | -2.87655900 | -2.01581100 | -2.07233300 |
| H | 2.19374200  | -3.71268100 | 1.40230500  |
| H | 3.64090500  | -1.47259200 | 2.16502600  |
| C | -0.62499700 | 2.06213100  | -3.07630400 |
| C | 0.67681100  | 1.38744600  | -2.81620400 |

|   |             |            |             |
|---|-------------|------------|-------------|
| C | -1.10513900 | 3.22645800 | -2.57128600 |
| C | -2.46425700 | 3.79815100 | -3.05034900 |
| C | -3.02040400 | 4.86696000 | -2.08341500 |
| H | -2.35767400 | 5.73500500 | -1.99732800 |
| H | -3.98824300 | 5.23151100 | -2.44931500 |
| H | -3.17783400 | 4.45845100 | -1.07825500 |
| C | -3.54319400 | 2.69630400 | -3.16729900 |
| H | -3.28003700 | 1.93877900 | -3.91323200 |
| H | -3.69702600 | 2.19250400 | -2.20676700 |
| H | -4.49991400 | 3.13517100 | -3.47952500 |
| C | -2.29085600 | 4.45205500 | -4.44570400 |
| H | -3.24141600 | 4.86861600 | -4.80746100 |
| H | -1.55719800 | 5.26530000 | -4.41780000 |
| H | -1.93997000 | 3.71562300 | -5.17738700 |
| C | -0.24825300 | 4.02675500 | -1.60506200 |
| H | -0.86780300 | 4.49119000 | -0.82805600 |
| H | 0.41954000  | 3.33798800 | -1.07253500 |
| C | 0.62055800  | 5.12592600 | -2.25697100 |
| H | -0.02228600 | 5.85673800 | -2.76783000 |
| H | 1.24464100  | 4.67161200 | -3.03919600 |
| C | 1.51211400  | 5.86373800 | -1.24966400 |
| H | 0.88027900  | 6.31074100 | -0.46811600 |
| C | 2.15713600  | 5.13544000 | -0.73795900 |
| H | 2.37839800  | 6.95460900 | -1.88956600 |
| H | 1.75914800  | 7.71731400 | -2.37834600 |
| H | 3.00371100  | 7.46254000 | -1.14510100 |
| H | 3.04475600  | 6.53407400 | -2.65332500 |
| H | 0.97554800  | 0.78376400 | -3.68181600 |
| H | 1.48368700  | 2.09453700 | -2.59068700 |

## 16

|   |            |             |             |
|---|------------|-------------|-------------|
| C | 1.97350400 | 0.35107400  | -0.06212100 |
| C | 4.21674100 | -0.06937500 | 0.25837500  |
| C | 4.00477600 | 1.23260600  | 0.58530600  |
| N | 2.63975500 | 1.47856500  | 0.38763300  |
| N | 2.97643100 | -0.59723400 | -0.13270700 |
| C | 2.01389800 | 2.76497700  | 0.62385000  |
| C | 1.55483000 | 3.07072900  | 1.92481000  |
| C | 1.91468500 | 3.67962900  | -0.45113200 |
| C | 0.96877000 | 4.33131800  | 2.12479600  |
| C | 1.32201500 | 4.92536400  | -0.19330400 |
| C | 0.84973600 | 5.24760700  | 1.08004200  |
| H | 0.60258500 | 4.59351900  | 3.11119600  |
| H | 1.23224200 | 5.64964200  | -0.99536300 |
| H | 0.39206400 | 6.21565300  | 1.25819800  |
| C | 2.81501000 | -1.96460500 | -0.58350800 |
| C | 2.87470400 | -2.23349200 | -1.96921900 |
| C | 2.65545100 | -2.98652800 | 0.38107100  |
| C | 2.75626000 | -3.57096600 | -2.38055200 |
| C | 2.55008900 | -4.30679100 | -0.08514100 |
| C | 2.59721700 | -4.59791300 | -1.44999000 |
| H | 2.79585600 | -3.80739300 | -3.43878900 |
| H | 2.42668000 | -5.11341500 | 0.62830100  |
| H | 2.51275600 | -5.62642700 | -1.78699800 |
| C | 2.47688600 | 3.37453000  | -1.84130200 |
| H | 2.67127600 | 2.29763400  | -1.89814900 |
| C | 3.82723700 | 4.10221400  | -2.05789500 |
| H | 4.56131300 | 3.81939500  | -1.29514300 |
| H | 3.69537500 | 5.18984200  | -2.01077400 |
| H | 4.24325800 | 3.85278800  | -3.04133600 |
| C | 1.48790300 | 3.71982500  | -2.97655300 |
| H | 1.30047600 | 4.79790600  | -3.03843500 |
| H | 0.52480500 | 3.21841400  | -2.83391400 |
| H | 1.90096500 | 3.40262000  | -3.94128400 |
| C | 3.08458300 | -1.13807600 | -3.01525200 |
| H | 3.16254300 | -0.17921500 | -2.49272300 |
| C | 1.88405000 | -1.03386500 | -3.98415900 |
| H | 2.04644400 | -0.22329200 | -4.70472800 |
| H | 0.95697200 | -0.82645700 | -3.43831600 |
| H | 1.74556600 | -1.96240400 | -4.55063600 |
| C | 4.40583100 | -1.34761300 | -3.79265200 |
| H | 4.38792900 | -2.28198300 | -4.36581100 |
| H | 5.26490900 | -1.38706600 | -3.11337100 |
| H | 4.56563900 | -0.52457900 | -4.49922500 |
| C | 2.64285100 | -2.69586000 | 1.88316600  |
| H | 2.39828200 | -1.63637400 | 2.01644200  |
| C | 1.57374700 | -3.50646000 | 2.64663200  |
| H | 1.80844600 | -4.57782300 | 2.66116100  |

|    |             |             |             |
|----|-------------|-------------|-------------|
| H  | 0.57985100  | -3.37636800 | 2.21154700  |
| H  | 1.52975600  | -3.16843200 | 3.68785000  |
| C  | 4.04197700  | -2.94699100 | 2.50167500  |
| H  | 4.81553800  | -2.33192900 | 2.02904300  |
| H  | 4.33139100  | -3.99884100 | 2.38752900  |
| H  | 4.02982200  | -2.71272300 | 3.57256300  |
| C  | 1.72156200  | 2.11529200  | 3.10736800  |
| H  | 2.07418100  | 1.15346300  | 2.72093500  |
| C  | 0.39015700  | 1.84168800  | 3.84189500  |
| H  | -0.32400600 | 1.33852200  | 3.18214200  |
| H  | -0.05711300 | 2.76573300  | 4.22820200  |
| H  | 0.57484200  | 1.18215200  | 4.69904700  |
| C  | 2.79802100  | 2.65233700  | 4.08385000  |
| H  | 2.48734000  | 3.60756500  | 4.52424300  |
| H  | 3.75897700  | 2.81270000  | 3.57998300  |
| H  | 2.95518500  | 1.93965500  | 4.90179700  |
| Ni | 0.06360600  | 0.33853300  | -0.53183500 |
| C  | -1.90754500 | -2.67095100 | 1.30540200  |
| C  | -1.85202700 | -1.66711200 | 2.30460900  |
| C  | -2.42802100 | -1.90796100 | 3.55705000  |
| C  | -3.04387900 | -3.14062900 | 3.77752800  |
| C  | -3.08825200 | -4.12708000 | 2.77535500  |
| C  | -2.51657100 | -3.90882600 | 1.51933400  |
| C  | -0.83526300 | -0.84374000 | 0.57134400  |
| H  | -2.39410800 | -1.14618600 | 4.33116800  |
| H  | -3.50002500 | -3.34557700 | 4.74290000  |
| H  | -3.57777200 | -5.07579600 | 2.97996100  |
| H  | -2.55346500 | -4.67204700 | 0.74630800  |
| H  | -2.41037000 | -0.29071900 | -2.80413000 |
| N  | -1.18543600 | -0.55217100 | 1.81458400  |
| N  | -1.25234400 | -2.12524000 | 0.21283200  |
| C  | -1.05591200 | -2.79285300 | -1.05386600 |
| H  | -2.01628200 | -3.01098400 | -1.53679000 |
| H  | -0.50433600 | -3.73101500 | -0.91927100 |
| H  | -0.47491900 | -2.13751600 | -1.70454700 |
| H  | 4.67832500  | 1.99406900  | 0.93738000  |
| H  | 5.11371100  | -0.66284600 | 0.25982800  |
| C  | -2.68125700 | 0.24510800  | -1.89679300 |
| C  | -1.56589600 | 0.97638200  | -1.26489800 |
| C  | -3.95466100 | 0.15051400  | -1.44962900 |
| C  | -5.01421800 | -0.71637600 | -2.15602400 |
| C  | -6.29227100 | 0.11140600  | -2.43726600 |
| H  | -6.73434700 | 0.51073500  | -1.51891200 |
| H  | -7.05172200 | -0.51623100 | -2.92066000 |
| H  | -6.07813100 | 0.95490800  | -3.10428700 |
| C  | -4.52609600 | -1.28479300 | -3.50285200 |
| H  | -3.66979600 | -1.95723400 | -3.37792700 |
| H  | -4.23394400 | -0.48785700 | -4.19644800 |
| H  | -5.32987600 | -1.86238000 | -3.97478800 |
| C  | -5.39157600 | -1.91370000 | -1.24639700 |
| H  | -6.14212400 | -2.54612700 | -1.73823700 |
| H  | -5.81126900 | -1.58774900 | -0.28941500 |
| H  | -4.51394600 | -2.53135100 | -1.02589500 |
| C  | -4.37733700 | 0.88358000  | -0.18152900 |
| H  | -3.59025000 | 0.78109700  | 0.57518900  |
| H  | -5.26609400 | 0.41096000  | 0.25408900  |
| C  | -4.68141300 | 2.38558100  | -0.37965400 |
| H  | -3.80526100 | 2.87894800  | -0.82087100 |
| H  | -5.49486700 | 2.50795900  | -1.10722400 |
| C  | -5.05838500 | 3.09437400  | 0.92794800  |
| H  | -4.24232800 | 2.96980200  | 1.65366600  |
| H  | -5.93550100 | 2.60010400  | 1.37040100  |
| C  | -5.35480300 | 4.58649400  | 0.74168600  |
| H  | -4.48385800 | 5.11464500  | 0.33327200  |
| H  | -5.61931100 | 5.06559400  | 1.69189700  |
| H  | -6.18978800 | 4.74189700  | 0.04677500  |
| H  | -1.88401500 | 1.73705600  | -0.54405400 |
| H  | -0.92893100 | 1.46454000  | -2.04796700 |

Cartesian coordinates for the stationary points given in Fig. 2.

### NaO<sub>t</sub>Bu

|   |             |            |             |
|---|-------------|------------|-------------|
| O | -0.75431600 | 0.00003700 | -0.12712400 |
| C | 0.61635600  | 0.00000200 | -0.00372200 |

|    |             |             |             |
|----|-------------|-------------|-------------|
| C  | 1.27221200  | 0.00211500  | -1.40769900 |
| C  | 1.08202900  | 1.25930500  | 0.76964000  |
| C  | 1.08226000  | -1.26146700 | 0.76595700  |
| H  | 0.94773700  | -0.88380000 | -1.96761500 |
| H  | 0.94744700  | 0.88950500  | -1.96510600 |
| H  | 2.37025500  | 0.00224200  | -1.36677100 |
| H  | 0.62054300  | 1.27114500  | 1.76552500  |
| H  | 2.17252100  | 1.30878900  | 0.89538700  |
| H  | 0.75581800  | 2.16103700  | 0.23629100  |
| H  | 2.17275500  | -1.31105800 | 0.89163500  |
| H  | 0.62068300  | -1.27633400 | 1.76176600  |
| H  | 0.75629300  | -2.16171000 | 0.22995400  |
| Na | -2.69515100 | 0.00001500  | -0.01901200 |

### TS<sub>1h-17</sub>

|    |             |             |             |
|----|-------------|-------------|-------------|
| C  | 0.88910200  | -1.27793300 | -0.00020000 |
| C  | 1.30626300  | -3.57014100 | -0.21900500 |
| C  | 2.47929000  | -2.98271000 | 0.12405500  |
| N  | 2.23253200  | -1.60588400 | 0.25653900  |
| N  | 0.34446000  | -2.54482300 | -0.29456000 |
| C  | 3.25565200  | -0.64662200 | 0.59555200  |
| C  | 4.05315900  | -0.10225800 | -0.43839400 |
| C  | 3.45338200  | -0.30019200 | 1.95191200  |
| C  | 5.06855200  | 0.79944200  | -0.08144700 |
| C  | 4.47590300  | 0.61294400  | 2.25522500  |
| C  | 5.27913700  | 1.15637200  | 1.25159400  |
| H  | 5.69562100  | 1.22867500  | -0.85603200 |
| H  | 4.64213000  | 0.90094400  | 3.28815900  |
| H  | 6.06670500  | 1.85850400  | 1.50754000  |
| C  | -1.03300500 | -2.75709900 | -0.63777400 |
| C  | -1.95601400 | -3.08829300 | 0.38598900  |
| C  | -1.43612800 | -2.62217200 | -1.99088300 |
| C  | -3.30857800 | -3.24367500 | 0.03144300  |
| C  | -2.80122700 | -2.78192200 | -2.29134900 |
| C  | -3.73131800 | -3.08319700 | -1.29127000 |
| H  | -4.03485000 | -3.49249100 | 0.79777400  |
| H  | -3.13608500 | -2.67888200 | -3.31824200 |
| H  | -4.78008600 | -3.20167200 | -1.54383000 |
| C  | 2.59174100  | -0.87442800 | 3.07578200  |
| H  | 1.89572600  | -1.59152600 | 2.62950300  |
| C  | 3.44323100  | -1.63564500 | 4.11810100  |
| H  | 4.01975000  | -2.44183500 | 3.64962800  |
| H  | 4.15024600  | -0.96792200 | 4.62462400  |
| H  | 2.79618700  | -2.07831700 | 4.88499600  |
| C  | 1.73909200  | 0.22842200  | 3.74562300  |
| H  | 2.37074800  | 0.99744800  | 4.20687200  |
| H  | 1.08984400  | 0.71146900  | 3.00720900  |
| H  | 1.10748400  | -0.20459700 | 4.53122600  |
| C  | -1.52060200 | -3.28507300 | 1.83792500  |
| H  | -0.45007500 | -3.06801600 | 1.89534100  |
| C  | -2.23541000 | -2.30579100 | 2.79643800  |
| H  | -1.87767600 | -2.45488400 | 3.82195600  |
| H  | -2.02918300 | -1.26652500 | 2.51658800  |
| H  | -3.32160700 | -2.45805000 | 2.79760400  |
| C  | -1.72874800 | -4.75194900 | 2.28442900  |
| H  | -2.78953700 | -5.02958800 | 2.26303200  |
| H  | -1.18593600 | -5.44717400 | 1.63393100  |
| H  | -1.36618900 | -4.89024300 | 3.30966500  |
| C  | -0.43960900 | -2.32798200 | -3.11229800 |
| H  | 0.54705900  | -2.20922200 | -2.65554600 |
| C  | -0.76237200 | -1.00587300 | -3.84558300 |
| H  | -1.75384700 | -1.03257600 | -4.31496600 |
| H  | -0.72049600 | -0.15869900 | -3.15049900 |
| H  | -0.02507200 | -0.82490600 | -4.63643700 |
| C  | -0.36183000 | -3.51265100 | -4.10502800 |
| H  | -0.09446500 | -4.44427200 | -3.59339800 |
| H  | -1.31956700 | -3.67138300 | -4.61533400 |
| H  | 0.39675200  | -3.31381600 | -4.87097800 |
| C  | 3.84274900  | -0.46874200 | -1.90756200 |
| H  | 2.93763300  | -1.08102300 | -1.97019100 |
| C  | 3.60660900  | 0.78057500  | -2.78640800 |
| H  | 2.76615400  | 1.37214000  | -2.40981100 |
| H  | 4.49175400  | 1.42746500  | -2.81688400 |
| H  | 3.38212600  | 0.47803300  | -3.81654900 |
| C  | 5.02139600  | -1.31169500 | -2.45025100 |
| H  | 5.96099500  | -0.74704300 | -2.41245600 |
| H  | 5.15777900  | -2.22964300 | -1.86685000 |
| H  | 4.84037500  | -1.59431400 | -3.49442900 |
| Ni | 0.16900400  | 0.37258000  | -0.00690200 |
| C  | -0.31908600 | 4.40109500  | -0.55200000 |

|    |             |             |             |
|----|-------------|-------------|-------------|
| C  | 0.41175600  | 3.23569300  | -0.24597700 |
| C  | 1.80384600  | 3.29960200  | -0.11333600 |
| C  | 2.42446600  | 4.53439800  | -0.29829900 |
| C  | 1.68298000  | 5.69002900  | -0.60836100 |
| C  | 0.29532600  | 5.64157500  | -0.73878800 |
| C  | -1.73678200 | 2.64247600  | -0.33544300 |
| H  | 2.37692900  | 2.41057400  | 0.12969400  |
| H  | 3.50434000  | 4.60659400  | -0.19831200 |
| H  | 2.19933300  | 6.63667700  | -0.74479200 |
| H  | -0.27877800 | 6.53371300  | -0.97381100 |
| H  | -3.09149700 | 1.95947800  | -0.11371900 |
| N  | -0.48437700 | 2.16581800  | -0.12557800 |
| N  | -1.64287000 | 3.99451200  | -0.60263100 |
| C  | -2.75863700 | 4.86273000  | -0.91524000 |
| H  | -2.89662300 | 5.62886300  | -0.14163500 |
| H  | -2.59800600 | 5.36609200  | -1.87636000 |
| H  | -3.66176300 | 4.25529700  | -0.98313100 |
| H  | 3.45626400  | -3.40409200 | 0.28773800  |
| H  | 1.06269000  | -4.60049300 | -0.41378100 |
| O  | -3.97893700 | 1.25382300  | -0.03669900 |
| C  | -4.89292000 | 1.50079600  | 1.02437600  |
| C  | -5.74448800 | 0.23330400  | 1.20096100  |
| C  | -4.13229700 | 1.81031400  | 2.32868300  |
| C  | -5.80989300 | 2.68357200  | 0.65625800  |
| H  | -6.26628300 | -0.00437800 | 0.26644800  |
| H  | -5.10798100 | -0.62064400 | 1.46409500  |
| H  | -6.49356400 | 0.35641200  | 1.99288100  |
| H  | -3.50615300 | 2.70146600  | 2.21097600  |
| H  | -4.82193200 | 1.98539400  | 3.16385700  |
| H  | -3.47506600 | 0.97461300  | 2.59692500  |
| H  | -6.57637300 | 2.85572500  | 1.42251300  |
| H  | -5.22806500 | 3.60625300  | 0.55291300  |
| H  | -6.31117400 | 2.48684700  | -0.29800500 |
| Na | -2.38669700 | -0.15676500 | -0.51945100 |

## 17

|   |             |             |             |
|---|-------------|-------------|-------------|
| C | -1.04797500 | -1.19952200 | 0.03410900  |
| C | -1.60718100 | -3.45076300 | 0.34072900  |
| C | -2.73616200 | -2.80879500 | -0.05023800 |
| N | -2.40321600 | -1.45600700 | -0.23653600 |
| N | -0.58548400 | -2.48359400 | 0.39118300  |
| C | -3.35504800 | -0.45100600 | -0.64248900 |
| C | -4.12509700 | 0.20276800  | 0.34759100  |
| C | -3.51092300 | -0.16569100 | -2.01820300 |
| C | -5.07269400 | 1.14915600  | -0.07386100 |
| C | -4.46680200 | 0.79418200  | -2.38748800 |
| C | -5.24382900 | 1.44403000  | -1.42753900 |
| H | -5.67777700 | 1.66305300  | 0.66598600  |
| H | -4.60006400 | 1.03571300  | -3.43704700 |
| H | -5.97961200 | 2.18159800  | -1.73331400 |
| C | 0.77312900  | -2.75620000 | 0.76590400  |
| C | 1.68775100  | -3.19076900 | -0.22564100 |
| C | 1.16915500  | -2.57060200 | 2.11495400  |
| C | 3.02686200  | -3.39588000 | 0.15336400  |
| C | 2.52020700  | -2.78669600 | 2.44178000  |
| C | 3.44400900  | -3.18735700 | 1.47106500  |
| H | 3.74704500  | -3.72233200 | -0.58958300 |
| H | 2.84901500  | -2.64837400 | 3.46653100  |
| H | 4.48230500  | -3.34759500 | 1.74358200  |
| C | -2.66564400 | -0.84706300 | -3.09354200 |
| H | -2.03559000 | -1.59295500 | -2.59915700 |
| C | -3.54040300 | -1.58765900 | -4.13109000 |
| H | -4.19091100 | -2.32676900 | -3.64917100 |
| H | -4.17817700 | -0.89208200 | -4.68941000 |
| H | -2.90567900 | -2.11101300 | -4.85632400 |
| C | -1.71934000 | 0.16648000  | -3.77914000 |
| H | -2.28419300 | 0.95952000  | -4.28429000 |
| H | -1.05674700 | 0.63099100  | -3.04050100 |
| H | -1.10052200 | -0.33907000 | -4.53109400 |
| C | 1.26081300  | -3.43248400 | -1.67348000 |
| H | 0.19026600  | -3.21977000 | -1.74360800 |
| C | 1.97877200  | -2.47373500 | -2.65084200 |
| H | 1.64023400  | -2.65692800 | -3.67749000 |
| H | 1.75376700  | -1.42999500 | -2.40273900 |
| H | 3.06663600  | -2.61401000 | -2.62763500 |
| C | 1.47433200  | -4.90889200 | -2.08217900 |
| H | 2.53580800  | -5.18341400 | -2.05792600 |
| H | 0.93583400  | -5.58907000 | -1.41246800 |
| H | 1.10952600  | -5.07467100 | -3.10254300 |

|    |             |             |             |
|----|-------------|-------------|-------------|
| C  | 0.17825500  | -2.16540200 | 3.20587700  |
| H  | -0.78954900 | -1.99459300 | 2.72623100  |
| C  | 0.58155700  | -0.84356400 | 3.89832700  |
| H  | 1.55477700  | -0.92726300 | 4.39841300  |
| H  | 0.62434700  | -0.02374100 | 3.17152700  |
| H  | -0.16073000 | -0.57675500 | 4.65977900  |
| C  | 0.00064500  | -3.30432300 | 4.23880400  |
| H  | -0.32357200 | -4.23330400 | 3.75601200  |
| H  | 0.93672200  | -3.51033700 | 4.77205800  |
| H  | -0.75447900 | -3.02446400 | 4.98257400  |
| C  | -3.95606600 | -0.09500800 | 1.83726000  |
| H  | -3.08587400 | -0.74967300 | 1.94734100  |
| C  | -3.66530300 | 1.18456200  | 2.65345600  |
| H  | -2.78785100 | 1.70830000  | 2.26075900  |
| H  | -4.51420200 | 1.87883800  | 2.63562700  |
| H  | -3.47187400 | 0.92527700  | 3.70151700  |
| C  | -5.18627900 | -0.84512500 | 2.40203900  |
| H  | -6.09439000 | -0.23601600 | 2.31485900  |
| H  | -5.36091600 | -1.78582800 | 1.86690500  |
| H  | -5.03789300 | -1.07873500 | 3.46340300  |
| Ni | -0.20130300 | 0.38661800  | 0.01843600  |
| C  | 0.77155000  | 4.32808800  | 0.57150300  |
| C  | -0.09537500 | 3.27462900  | 0.21787000  |
| C  | -1.45425200 | 3.53078100  | -0.00150700 |
| C  | -1.90672700 | 4.84173300  | 0.14475000  |
| C  | -1.03130100 | 5.88463700  | 0.50180700  |
| C  | 0.32525000  | 5.64343600  | 0.72015400  |
| C  | 1.94799600  | 2.38010700  | 0.44364000  |
| H  | -2.12871100 | 2.72654100  | -0.28011500 |
| H  | -2.95741300 | 5.06440200  | -0.02275400 |
| H  | -1.41746400 | 6.89531700  | 0.60633500  |
| H  | 1.00147100  | 6.44901200  | 0.99358500  |
| H  | 3.58575800  | 1.55037900  | 0.01764500  |
| N  | 0.64878900  | 2.09130800  | 0.15347700  |
| N  | 2.01941200  | 3.73947100  | 0.70480000  |
| C  | 3.22014500  | 4.44998600  | 1.08758900  |
| H  | 3.48481800  | 5.21533900  | 0.34632300  |
| H  | 3.08973800  | 4.94252400  | 2.05933800  |
| H  | 4.03685100  | 3.73042600  | 1.16563200  |
| H  | -3.73415500 | -3.17757600 | -0.21442400 |
| H  | -1.43168400 | -4.48471700 | 0.58397700  |
| O  | 4.27116200  | 0.80585100  | -0.10381600 |
| C  | 5.11774800  | 1.02821100  | -1.24345300 |
| C  | 5.94820200  | -0.24879900 | -1.40849600 |
| C  | 4.25959500  | 1.28447000  | -2.49340500 |
| C  | 6.03700700  | 2.22898900  | -0.96544100 |
| H  | 6.53781300  | -0.44006400 | -0.50490300 |
| H  | 5.29323500  | -1.11090600 | -1.57979400 |
| H  | 6.63456800  | -0.16459500 | -2.25868000 |
| H  | 3.62514200  | 2.16681600  | -2.35451800 |
| H  | 4.88757900  | 1.45035100  | -3.37703900 |
| H  | 3.60578000  | 0.42837400  | -2.69402100 |
| H  | 6.74143300  | 2.39044600  | -1.79033600 |
| H  | 5.44976100  | 3.14621300  | -0.84232900 |
| H  | 6.61058300  | 2.06224700  | -0.04719600 |
| Na | 2.34004000  | -0.18645400 | 0.53191700  |

## TS<sub>17-18</sub>

|   |             |             |             |
|---|-------------|-------------|-------------|
| C | 0.74788900  | -1.28939300 | -0.00307000 |
| C | 1.00221500  | -3.60331600 | 0.24189700  |
| C | 2.14929800  | -3.12965000 | -0.30724000 |
| N | 1.99790200  | -1.74019600 | -0.45955200 |
| N | 0.15091200  | -2.49759300 | 0.42321500  |
| C | 3.00717700  | -0.87802300 | -1.02215800 |
| C | 3.01384900  | -0.64823800 | -2.41713600 |
| C | 3.96576800  | -0.29189300 | -0.16505300 |
| C | 4.01070400  | 0.18967000  | -2.94172800 |
| C | 4.94390600  | 0.53607000  | -0.73858700 |
| C | 4.96828000  | 0.77658400  | -2.11294000 |
| H | 4.03399300  | 0.38642200  | -4.00883300 |
| H | 5.68816900  | 1.00093100  | -0.09977900 |
| H | 5.73136100  | 1.42210200  | -2.53749100 |
| C | -1.16670800 | -2.54411200 | 0.99187400  |
| C | -1.32619300 | -2.32292300 | 2.38257500  |
| C | -2.27801700 | -2.77524800 | 0.14107700  |
| C | -2.63302300 | -2.29971300 | 2.90332500  |
| C | -3.56357700 | -2.74790500 | 0.71078000  |
| C | -3.74337800 | -2.50165900 | 2.07657400  |

|    |             |             |             |    |             |             |             |
|----|-------------|-------------|-------------|----|-------------|-------------|-------------|
| H  | -2.77993600 | -2.13517100 | 3.96588200  | C  | 1.56827700  | -0.68740600 | 0.19311300  |
| H  | -4.42910200 | -2.91963300 | 0.08082300  | C  | 2.82699800  | -2.46983700 | 1.03287300  |
| H  | -4.74401500 | -2.49072200 | 2.49844800  | C  | 3.70404400  | -1.56427700 | 0.52992600  |
| C  | 3.95925600  | -0.52349500 | 1.34506500  | N  | 2.94830800  | -0.49383500 | 0.02209300  |
| H  | 3.11808400  | -1.18389700 | 1.57736700  | N  | 1.53793600  | -1.94576900 | 0.82556600  |
| C  | 5.25288600  | -1.22804200 | 1.81698800  | C  | 3.52910700  | 0.68000200  | -0.58212200 |
| H  | 5.39849600  | -2.18319200 | 1.29873100  | C  | 3.69196000  | 0.72117100  | -1.98553500 |
| H  | 6.13735700  | -0.60697300 | 1.63017700  | C  | 3.93149000  | 1.75155600  | 0.24788200  |
| H  | 5.20644500  | -1.42739000 | 2.89454200  | C  | 4.26619700  | 1.87183600  | -2.54876000 |
| C  | 3.72741300  | 0.79638500  | 2.11607400  | C  | 4.50189100  | 2.87932900  | -0.36383600 |
| H  | 4.53373500  | 1.51643300  | 1.93035000  | C  | 4.66816400  | 2.94213500  | -1.74814300 |
| H  | 2.77997600  | 1.25719000  | 1.81771000  | H  | 4.39610300  | 1.93035200  | -3.62472100 |
| H  | 3.69235200  | 0.60350900  | 3.19556000  | H  | 4.81314800  | 3.71763600  | 0.25105200  |
| C  | -0.13211900 | -2.12465500 | 3.31495700  | H  | 5.10968800  | 3.82402500  | -2.20239200 |
| H  | 0.76743400  | -2.08736300 | 2.69436000  | C  | 0.31842400  | -2.59748300 | 1.21832700  |
| C  | -0.20771200 | -0.78597700 | 4.08323900  | C  | -0.28865400 | -2.24679200 | 2.45094700  |
| H  | 0.68129600  | -0.66473900 | 4.71338000  | C  | -0.24994200 | -3.56614700 | 0.35616300  |
| H  | -0.24292000 | 0.05631800  | 3.38369200  | C  | -1.50975500 | -2.86193600 | 2.78124200  |
| H  | -1.08663600 | -0.74251400 | 4.73931700  | C  | -1.47030700 | -4.15372100 | 0.73291900  |
| C  | 0.00994800  | -3.31968400 | 4.28837500  | C  | -2.10112200 | -3.80073200 | 1.92855600  |
| H  | -0.86219600 | -3.40237000 | 4.94862700  | H  | -1.99414900 | -2.61177900 | 3.71910100  |
| H  | 0.11180500  | -4.26623800 | 3.74532100  | H  | -1.93149500 | -4.88944600 | 0.08275700  |
| H  | 0.89763100  | -3.19064700 | 4.91868900  | H  | -3.04224500 | -4.26685000 | 2.20390400  |
| C  | -2.09449100 | -3.06590000 | -1.34788300 | C  | 3.73964200  | 1.72685000  | 1.76420300  |
| H  | -1.10016800 | -2.70338600 | -1.62673500 | H  | 3.35969100  | 0.73779800  | 2.03871800  |
| C  | -3.11727700 | -2.32953300 | -2.23978200 | C  | 5.07314500  | 1.93794500  | 2.51768000  |
| H  | -4.13508700 | -2.71521100 | -2.09796900 | H  | 5.82030100  | 1.19152100  | 2.22358200  |
| H  | -3.12177600 | -1.25373100 | -2.03656300 | H  | 5.49477100  | 2.93077400  | 2.32001300  |
| H  | -2.85886900 | -2.47968000 | -3.29465300 | H  | 4.91378700  | 1.85464500  | 3.59942500  |
| C  | -2.13746100 | -4.59205300 | -1.61200800 | C  | 2.67681400  | 2.76002900  | 2.20683600  |
| H  | -1.36877600 | -5.12126100 | -1.03823400 | H  | 2.98356800  | 3.78115700  | 1.94834100  |
| H  | -3.11412800 | -5.00861300 | -1.33550600 | H  | 1.71545300  | 2.55252000  | 1.72368000  |
| H  | -1.96962500 | -4.79765900 | -2.67584500 | H  | 2.53285100  | 2.71612100  | 3.29359700  |
| C  | 1.96453200  | -1.25674600 | -3.34685200 | C  | 0.36169900  | -1.26478600 | 3.42542600  |
| H  | 1.35346000  | -1.94597400 | -2.75539500 | H  | 1.19016900  | -0.78060500 | 2.90066600  |
| C  | 1.01546900  | -0.16686600 | -3.89911900 | C  | -0.60141100 | -0.14369100 | 3.87482700  |
| H  | 0.51058000  | 0.35221700  | -3.07711100 | H  | -0.07441200 | 0.55430800  | 4.53594900  |
| H  | 1.56699900  | 0.57238400  | -4.49368200 | H  | -0.97103200 | 0.42459200  | 3.01406600  |
| H  | 0.25204100  | -0.61871900 | -4.54510700 | H  | -1.45936700 | -0.53856400 | 4.43340600  |
| C  | 2.60654400  | -2.07217200 | -4.49249900 | C  | 0.94544700  | -2.02124300 | 4.64419900  |
| H  | 3.19830000  | -1.43413200 | -5.15981300 | H  | 0.15480100  | -2.52385000 | 5.21494300  |
| H  | 3.26761200  | -2.85528200 | -4.10331100 | H  | 1.67127700  | -2.78118000 | 4.33214900  |
| H  | 1.82789700  | -2.55174100 | -5.09784600 | H  | 1.45357400  | -1.32028700 | 5.31692100  |
| Ni | 0.04389000  | 0.36698000  | 0.09053900  | C  | 0.40793500  | -3.95610400 | -0.96826400 |
| C  | 0.35805200  | 3.93305200  | 0.47050300  | H  | 1.39796400  | -3.49155500 | -0.99724100 |
| C  | -0.10743600 | 3.08596400  | 1.50285100  | C  | -0.38725900 | -3.40266100 | -2.17494200 |
| C  | 0.16288300  | 3.39506500  | 2.83861200  | H  | -1.40655600 | -3.80950000 | -2.19478300 |
| C  | 0.90080800  | 4.54760900  | 3.11497400  | H  | -0.43685200 | -2.30791000 | -2.12414300 |
| C  | 1.36171900  | 5.38084200  | 2.07997300  | H  | 0.10540900  | -3.67789500 | -3.11523300 |
| C  | 1.09772900  | 5.08798600  | 0.74071100  | C  | 0.60795200  | -5.48392400 | -1.08802100 |
| C  | -0.80852300 | 2.19805900  | -0.43567500 | H  | 1.18637000  | -5.87665500 | -0.24416000 |
| H  | -0.19257400 | 2.74952000  | 3.63782300  | H  | -0.34908500 | -6.01818400 | -1.11732500 |
| H  | 1.12312100  | 4.80802400  | 4.14659500  | H  | 1.14782100  | -5.72148300 | -2.01209700 |
| H  | 1.93553700  | 6.27040600  | 2.32709500  | C  | 3.24354800  | -0.42524700 | -2.89049700 |
| H  | 1.46059500  | 5.73279700  | -0.05511100 | H  | 2.89244000  | -1.23892300 | -2.24805900 |
| H  | -2.41693800 | 1.55293900  | -1.10679300 | C  | 2.05056800  | 0.00371600  | -3.77645300 |
| N  | -0.83161100 | 2.03712400  | 0.92618400  | H  | 1.21326500  | 0.33721800  | -3.15285500 |
| N  | -0.08416200 | 3.36039300  | -0.70930600 | H  | 2.33086600  | 0.82367600  | -4.44936700 |
| C  | 0.22268600  | 3.85076400  | -2.03468100 | H  | 1.71204700  | -0.83813500 | -4.39362200 |
| H  | -0.13489800 | 4.87997900  | -2.16996500 | C  | 4.40765200  | -0.97518300 | -3.74628200 |
| H  | 1.30305700  | 3.82975000  | -2.22557700 | H  | 4.79092600  | -0.21777000 | -4.44059300 |
| H  | -0.27416700 | 3.20046400  | -2.75701400 | H  | 5.24213400  | -1.30683500 | -3.11755200 |
| H  | 3.05017000  | -3.64031600 | -0.60178900 | H  | 4.06834200  | -1.83057100 | -4.34310100 |
| H  | 0.71674400  | -4.60322000 | 0.52059700  | Ni | 0.18977600  | 0.47945700  | -0.08395900 |
| O  | -3.34199200 | 1.12483000  | -1.02332200 | C  | -2.39574500 | 3.69144800  | 0.01196300  |
| C  | -4.35780100 | 2.00345800  | -1.53616100 | C  | -3.19326200 | 2.66317600  | 0.57312300  |
| C  | -5.68172600 | 1.24339800  | -1.40684000 | C  | -4.47968600 | 2.96294500  | 1.04062900  |
| C  | -4.39494500 | 3.29948200  | -0.70868500 | C  | -4.93808400 | 4.27634200  | 0.93186100  |
| C  | -4.05606600 | 2.31218800  | -3.01153300 | C  | -4.13491700 | 5.28538500  | 0.36922400  |
| H  | -5.64111600 | 0.30495700  | -1.97022100 | C  | -2.84853000 | 5.00789100  | -0.09895100 |
| H  | -5.88688000 | 1.00450400  | -0.35585200 | C  | -1.26493600 | 1.71802900  | -0.00086800 |
| H  | -6.51698900 | 1.84160300  | -1.78833200 | H  | -5.09848100 | 2.18783500  | 1.48753400  |
| H  | -3.43044700 | 3.81561000  | -0.75453600 | H  | -5.93276300 | 4.52819900  | 1.29156500  |
| H  | -5.17005000 | 3.98273400  | -1.07630900 | H  | -4.52065700 | 6.29934300  | 0.30017000  |
| H  | -4.60848900 | 3.07674700  | 0.34385500  | H  | -2.22922000 | 5.79029300  | -0.52978500 |
| H  | -4.83330400 | 2.94863100  | -3.45131300 | H  | -2.80205700 | -1.68227900 | -2.12602100 |
| H  | -3.09662600 | 2.83345500  | -3.10558100 | N  | -2.48740200 | 1.47425500  | 0.54779000  |
| H  | -3.99738500 | 1.38402400  | -3.58968800 | N  | -1.20951300 | 3.07559600  | -0.33637400 |
| Na | -2.48279900 | 0.31069700  | 0.91690500  |    |             |             |             |

|    |             |             |             |
|----|-------------|-------------|-------------|
| C  | -0.08121600 | 3.74505100  | -0.94757800 |
| H  | -0.35909400 | 4.18138700  | -1.91605200 |
| H  | 0.29994000  | 4.54634900  | -0.30156100 |
| H  | 0.70767800  | 3.00502900  | -1.10085500 |
| H  | 4.77961600  | -1.57664900 | 0.48416400  |
| H  | 2.99137300  | -3.42038700 | 1.51109000  |
| O  | -3.42357300 | -1.63770700 | -1.37978100 |
| C  | -4.68818800 | -1.10932300 | -1.88221900 |
| C  | -5.56371200 | -0.92457200 | -0.64186100 |
| C  | -4.43040600 | 0.22895800  | -2.58407700 |
| C  | -5.29362600 | -2.14177600 | -2.84102000 |
| H  | -5.67688100 | -1.87379700 | -0.10529000 |
| H  | -5.12407100 | -0.18204500 | 0.03285500  |
| H  | -6.56001700 | -0.57205300 | -0.92801900 |
| H  | -3.77047800 | 0.09286900  | -3.45119100 |
| H  | -5.36816500 | 0.66351000  | -2.94830600 |
| H  | -3.95912800 | 0.93861300  | -1.89771700 |
| H  | -6.26232700 | -1.80005500 | -3.22261000 |
| H  | -4.63610300 | -2.30564800 | -3.70425800 |
| H  | -5.43912400 | -3.10082100 | -2.33263100 |
| Na | -2.19302100 | -0.77133200 | 0.38932200  |

### TS<sub>18-19</sub>

|   |             |             |             |
|---|-------------|-------------|-------------|
| C | 0.51090300  | 2.57462500  | 0.28858600  |
| C | -0.81815900 | 4.33203600  | 1.07429100  |
| C | -1.45172300 | 3.18442500  | 1.40468300  |
| N | -0.66983100 | 2.12140700  | 0.91916700  |
| N | 0.36605100  | 3.97700300  | 0.39223100  |
| C | -1.15118600 | 0.76075400  | 0.88941600  |
| C | -2.13399100 | 0.41454200  | -0.06995300 |
| C | -0.66698300 | -0.17592600 | 1.83349500  |
| C | -2.59640200 | -0.91222800 | -0.09103800 |
| C | -1.15642600 | -1.48974300 | 1.76340800  |
| C | -2.10493900 | -1.85888800 | 0.80684100  |
| H | -3.35062700 | -1.20170700 | -0.81586600 |
| H | -0.79774400 | -2.23123600 | 2.46713300  |
| H | -2.46945300 | -2.88115700 | 0.77223700  |
| C | 1.20319100  | 4.98198700  | -0.21829500 |
| C | 2.11404000  | 5.71350600  | 0.58454400  |
| C | 1.00695300  | 5.29229800  | -1.59057200 |
| C | 2.82228600  | 6.77274400  | -0.01621400 |
| C | 1.75289300  | 6.34525200  | -2.14397400 |
| C | 2.64475100  | 7.08702100  | -1.36619600 |
| H | 3.49735900  | 7.36908100  | 0.58824400  |
| H | 1.61954600  | 6.59944800  | -3.18853500 |
| H | 3.18369400  | 7.92136500  | -1.80644700 |
| C | 0.29690000  | 0.24690100  | 2.94288400  |
| H | 0.93887300  | 1.03456500  | 2.53345700  |
| C | -0.48693700 | 0.83521300  | 4.14429600  |
| H | 0.20885700  | 1.16593300  | 4.92505700  |
| H | -1.09485100 | 1.69609600  | 3.84691400  |
| H | -1.15386800 | 0.08061800  | 4.58044600  |
| C | 1.22325500  | -0.88822300 | 3.41807300  |
| H | 0.66964800  | -1.69415700 | 3.91576300  |
| H | 1.78873400  | -1.31253300 | 2.58243700  |
| H | 1.94252900  | -0.49368700 | 4.14408400  |
| C | 2.31768900  | 5.41435000  | 2.07184400  |
| H | 2.04856200  | 4.36389100  | 2.23099700  |
| C | 3.78424400  | 5.60923600  | 2.52151600  |
| H | 3.92552500  | 5.18291000  | 3.52005300  |
| H | 4.48944700  | 5.12133700  | 1.84186600  |
| H | 4.04816800  | 6.67265400  | 2.57993600  |
| C | 1.39988700  | 6.28963500  | 2.96383900  |
| H | 1.58459300  | 6.06903500  | 4.02194600  |
| H | 1.60439400  | 7.35479700  | 2.79829000  |
| H | 0.34071800  | 6.10942400  | 2.76473900  |
| C | -0.04251600 | 4.56919100  | -2.43679400 |
| H | -0.13950500 | 3.55385900  | -2.03892700 |
| C | 0.34477800  | 4.44552700  | -3.92429100 |
| H | 0.31017100  | 5.41468400  | -4.43825400 |
| H | 1.34227600  | 4.01768000  | -4.05014900 |
| H | -0.36595100 | 3.78558200  | -4.43399000 |
| C | -1.41806400 | 5.27602000  | -2.31138500 |
| H | -1.76724000 | 5.31358700  | -1.27494900 |
| H | -1.35788000 | 6.30386800  | -2.69098300 |
| H | -2.17003000 | 4.74098700  | -2.90396200 |
| C | -2.75040700 | 1.43979200  | -1.02646200 |
| H | -2.19940600 | 2.37819700  | -0.91957700 |

|    |             |             |             |
|----|-------------|-------------|-------------|
| C  | -2.64637000 | 1.02470800  | -2.51040700 |
| H  | -1.60148500 | 0.93885600  | -2.82037100 |
| H  | -3.14366000 | 0.06663000  | -2.70357900 |
| H  | -3.12664100 | 1.78015900  | -3.14421600 |
| C  | -4.22552400 | 1.71944300  | -0.64521500 |
| H  | -4.83898500 | 0.81731400  | -0.75763700 |
| H  | -4.31412900 | 2.05575500  | 0.39401600  |
| H  | -4.64639900 | 2.49745000  | -1.29338800 |
| Ni | 1.91249500  | 1.49458800  | -0.21637600 |
| C  | 2.90066000  | 1.78636300  | -4.04331300 |
| C  | 1.90909600  | 0.79828000  | -4.28592900 |
| C  | 1.50640200  | 0.44738400  | -5.57146900 |
| C  | 2.11602600  | 1.11207300  | -6.64424200 |
| C  | 3.09491800  | 2.09213900  | -6.42355500 |
| C  | 3.49666800  | 2.44018800  | -5.12985000 |
| C  | 2.25704200  | 1.05268200  | -2.06318200 |
| H  | 0.75369400  | -0.31714500 | -5.74556300 |
| H  | 1.82808800  | 0.85851100  | -7.66097600 |
| H  | 3.55314900  | 2.58813900  | -7.27569500 |
| H  | 4.25854600  | 3.19840700  | -4.96345900 |
| N  | 1.50688900  | 0.36545900  | -3.02988800 |
| N  | 3.10948300  | 1.91773100  | -2.68804700 |
| C  | 0.64110600  | -0.76343000 | -2.77503700 |
| H  | 0.20763900  | -0.66708300 | -1.77737100 |
| H  | -0.17368000 | -0.78168100 | -3.50537300 |
| H  | 1.18418200  | -1.71752200 | -2.84107200 |
| H  | -2.38228100 | 3.01739400  | 1.91878600  |
| H  | -1.09363700 | 5.35879100  | 1.23693500  |
| C  | 3.58178600  | 0.61996400  | 0.37259600  |
| C  | 3.09616800  | -0.03679800 | -0.88550000 |
| C  | 4.76333200  | 0.30177400  | 0.95379900  |
| C  | 5.23750500  | 0.89988300  | 2.30192600  |
| C  | 4.30931700  | 2.01624600  | 2.80037800  |
| H  | 3.28365600  | 1.65923100  | 2.91515600  |
| H  | 4.66680000  | 2.39951200  | 3.76597500  |
| H  | 4.27602900  | 2.85244600  | 2.09631200  |
| C  | 6.66907300  | 1.47896600  | 2.19575500  |
| H  | 7.40105200  | 0.72541600  | 1.88565900  |
| H  | 6.70903900  | 2.30369400  | 1.47155700  |
| H  | 6.99751400  | 1.87417300  | 3.16625300  |
| C  | 5.24540900  | -0.21119400 | 3.38450600  |
| H  | 5.54505000  | 0.20271900  | 4.35656700  |
| H  | 4.24814600  | -0.64943000 | 3.49390100  |
| H  | 5.94309900  | -1.02147900 | 3.14713700  |
| C  | 5.68258500  | -0.77376000 | 0.35022300  |
| H  | 6.34004600  | -1.20704500 | 1.11463600  |
| H  | 5.07185000  | -1.60900200 | -0.01921100 |
| C  | 6.57677900  | -0.28198300 | -0.81017400 |
| H  | 7.20960100  | 0.54548600  | -0.45963700 |
| H  | 5.94786300  | 0.13319700  | -1.61087100 |
| C  | 7.47047000  | -1.38187800 | -1.40026000 |
| H  | 8.10702200  | -1.79673800 | -0.60539500 |
| H  | 6.83876100  | -2.21177900 | -1.74803500 |
| C  | 8.34923400  | -0.89202100 | -2.55628100 |
| H  | 9.01912700  | -0.08566900 | -2.23096500 |
| H  | 8.97298500  | -1.69914300 | -2.95827900 |
| H  | 7.73772600  | -0.50285100 | -3.38015300 |
| H  | 3.84648300  | -0.31107800 | -1.63120100 |
| H  | 2.44197600  | -0.89915100 | -0.70523300 |
| Na | 4.24674400  | 2.82436600  | -0.87930800 |
| H  | 4.71957900  | 5.53657900  | -0.88823200 |
| O  | 5.36707500  | 4.80727100  | -0.90425700 |
| C  | 6.61113200  | 5.29404700  | -1.48010900 |
| C  | 7.56492700  | 4.09911800  | -1.45571200 |
| C  | 6.34751000  | 5.76303900  | -2.91651800 |
| C  | 7.14061100  | 6.43907800  | -0.60722500 |
| H  | 7.71040400  | 3.74113400  | -0.43085000 |
| H  | 7.17336800  | 3.27377900  | -2.06139300 |
| H  | 8.54166500  | 4.38107300  | -1.86264500 |
| H  | 5.62882900  | 6.59148500  | -2.93175700 |
| H  | 7.27202900  | 6.11263000  | -3.38973000 |
| H  | 5.93813800  | 4.94519400  | -3.51870000 |
| H  | 8.09761600  | 6.81182200  | -0.98886100 |
| H  | 6.43679100  | 7.28073300  | -0.59641000 |
| H  | 7.28648300  | 6.09990600  | 0.42349900  |

### ZTS<sub>18-19</sub>

|   |            |            |            |
|---|------------|------------|------------|
| C | 0.47123700 | 2.51889200 | 0.14634700 |
|---|------------|------------|------------|



C -0.90985900 4.21055600 0.98788200  
C -1.47860700 3.03309100 1.33121300  
N -0.66677400 2.00768300 0.81296900  
N 0.26112600 3.91045700 0.26068500  
C -1.04157800 0.61539600 0.88188100  
C -2.06405100 0.14354200 0.02155600  
C -0.42125700 -0.22803800 1.83634600  
C -2.42740100 -1.21085800 0.10952000  
C -0.81556500 -1.57485600 1.87456700  
C -1.80234200 -2.06534600 1.01673900  
H -3.20918500 -1.59668400 -0.53629500  
H -0.35128700 -2.24610400 2.58714600  
H -2.09210100 -3.11070800 1.06615000  
C 1.12813200 4.94634500 -0.23612600  
C 1.96789000 5.62807100 0.67772700  
C 1.04910800 5.32393000 -1.60224300  
C 2.73722700 6.70480000 0.19677500  
C 1.84962700 6.39273000 -2.03519400  
C 2.68066700 7.08341700 -1.14695000  
H 3.36084700 7.26361900 0.88771000  
H 1.80839600 6.70215000 -3.07235400  
H 3.25780400 7.93475300 -1.49807400  
C 0.58570600 0.32317600 2.84773100  
H 1.14211100 1.12502800 2.35024900  
C -0.15273500 0.92542100 4.07091900  
H 0.57089000 1.34354900 4.78155700  
H -0.83799900 1.72687000 3.77546100  
H -0.73415300 0.15446400 4.59247700  
C 1.62423500 -0.71498300 3.31443500  
H 1.17127900 -1.51423100 3.91470000  
H 2.14484200 -1.16189800 2.46237400  
H 2.37562700 -0.22232700 3.94157100  
C 2.01107300 5.27162600 2.16470200  
H 1.49443400 4.31566700 2.29215700  
C 3.45170400 5.08706000 2.68760100  
H 3.42860400 4.77343400 3.73766800  
H 3.98405900 4.31854300 2.11945100  
H 4.02933200 6.01769000 2.63454100  
C 1.26842600 6.33464700 3.01196700  
H 1.27620600 6.04951700 4.07059600  
H 1.75101500 7.31573500 2.92198100  
H 0.22498600 6.44407300 2.69832100  
C 0.06395600 4.64713800 -2.55736700  
H 0.00245400 3.59298900 -2.26539200  
C 0.50072000 4.69644000 -4.03466600  
H 0.44790900 5.71430400 -4.44232300  
H 1.51568500 4.31531800 -4.17344400  
H -0.17070000 4.07339600 -4.63569700  
C -1.34895900 5.27156400 -2.41032600  
H -1.73271300 5.18013800 -1.38983800  
H -1.32912000 6.33580600 -2.67743300  
H -2.05248900 4.76743300 -3.08382300  
C -2.82429200 1.06973700 -0.93244000  
H -2.25652000 2.00162600 -1.02011400  
C -2.97744600 0.49151700 -2.35601900  
H -2.00609700 0.24761900 -2.79297400  
H -3.59291900 -0.41580500 -2.36481900  
H -3.46844400 1.22654000 -3.00492100  
C -4.22179700 1.41559200 -0.35805500  
H -4.83625500 0.51162800 -0.26477800  
H -4.15114000 1.87426200 0.63358100  
H -4.74532900 2.11544800 -1.02057900  
Ni 1.93070300 1.54430300 -0.39588900  
C 3.06850300 2.05389800 -4.15893400  
C 2.07548600 1.09658800 -4.49860000  
C 1.69722100 0.84977500 -5.81587100  
C 2.33790300 1.58687900 -6.82034200  
C 3.32298700 2.53478900 -6.50397400  
C 3.69812100 2.77908800 -5.17951800  
C 2.36582000 1.18563500 -2.25597400  
H 0.94095000 0.10974700 -6.06420100  
H 2.07029200 1.41588700 -7.85958100  
H 3.80652200 3.08733000 -7.30581700  
H 4.46569100 3.51154300 -4.94018100  
N 1.64555200 0.57228300 -3.28935700  
N 3.24440700 2.08066000 -2.79375900  
C 0.69633000 -0.50407000 -3.13396700  
H 0.26074800 -0.45359700 -2.13342500  
H -0.10665300 -0.39978200 -3.87096400  
H 1.16470400 -1.48908500 -3.27365800

H -2.37809300 2.82241500 1.88246700  
H -1.21554700 5.22383600 1.18125100  
C 3.58549800 0.65312200 0.18343000  
C 3.14814900 0.03961800 -1.10594400  
C 4.62044500 0.30774600 0.98327400  
C 5.56644100 -0.91864300 0.74700400  
C 4.77302000 -2.18349100 0.34314500  
H 4.28443600 -2.08300000 -0.62738100  
H 5.44855400 -3.04697800 0.27966100  
H 4.00098200 -2.41453500 1.08644300  
C 6.36850800 -1.31242900 2.01104200  
H 7.00601100 -0.50453700 2.38231200  
H 5.70557800 -1.62156500 2.82764400  
H 7.02286500 -2.16259300 1.77993600  
C 6.58319900 -0.59187600 -0.37623500  
H 7.24096300 -1.45035600 -0.57210700  
H 6.07680300 -0.34040000 -1.31439300  
H 7.21931400 0.25816800 -0.10242800  
C 4.89049100 1.16694300 2.21975600  
H 3.99738300 1.77901600 2.38858400  
H 5.01021600 0.53690100 3.11241000  
C 6.11571800 2.10563700 2.13490800  
H 5.91905300 2.89226000 1.38783700  
H 6.99530500 1.56118700 1.76717600  
C 6.47347200 2.76547800 3.47430600  
H 5.59357100 3.29173400 3.86875400  
H 6.70864100 1.97913200 4.20560400  
C 7.65293700 3.73913400 3.37916100  
H 7.43117300 4.56498800 2.69041600  
H 7.89383100 4.17788200 4.35471700  
H 8.55477800 3.23453100 3.00999100  
H 3.93761900 -0.19598900 -1.82505400  
H 2.47899700 -0.82269900 -1.00949100  
Na 4.23725800 2.96035100 -0.89003400  
H 4.77825100 5.66955700 -0.87183800  
O 5.39670500 4.91823400 -0.92576200  
C 6.63509300 5.36186500 -1.54477000  
C 7.48589200 4.09964200 -1.69749300  
C 6.31904600 5.98294700 -2.91111500  
C 7.31270400 6.37577700 -0.61398700  
H 7.65808000 3.62857200 -0.72364400  
H 6.99252400 3.37504700 -2.35570100  
H 8.45912900 4.34490200 -2.13536600  
H 5.68100500 6.86862100 -2.80086100  
H 7.23756500 6.29556400 -3.42016200  
H 5.79683800 5.26256000 -3.54921400  
H 8.26704700 6.71557600 -1.03174800  
H 6.67828800 7.25947800 -0.47098800  
H 7.50322500 5.92743700 0.36657400

19

C -2.08920800 -0.66578000 -0.61564100  
C -3.67564500 -1.68606300 -2.00247600  
C -4.23541500 -0.54239900 -1.53696300  
N -3.28185200 0.07878100 -0.70703800  
N -2.38240900 -1.75988500 -1.45941700  
C -3.51995300 1.35423500 -0.07943600  
C -4.13598700 1.39351000 1.19256200  
C -3.19311400 2.53602300 -0.78712600  
C -4.42096700 2.65102300 1.74909900  
C -3.50193200 3.76870700 -0.18954300  
C -4.10981500 3.82788300 1.06686900  
H -4.89556200 2.70852800 2.72269100  
H -3.27449200 4.69002700 -0.71548100  
H -4.34735900 4.79058600 1.51001200  
C -1.44417300 -2.80230000 -1.79100500  
C -0.65487300 -2.66270300 -2.95716200  
C -1.36262500 -3.95189300 -0.97199400  
C 0.23686500 -3.69865500 -3.27990900  
C -0.46165200 -4.96345800 -1.34135000  
C 0.33441600 -4.84032500 -2.48152200  
H 0.85209300 -3.61281200 -4.17036000  
H -0.38329200 -5.85527400 -0.72806000  
H 1.02240700 -5.63610800 -2.75206500  
C -2.56985000 2.48417000 -2.18274900  
H -2.09810900 1.50199500 -2.29060500  
C -3.65533800 2.62004700 -3.27984900  
H -4.40605200 1.82727600 -3.20018900

|    |             |             |             |
|----|-------------|-------------|-------------|
| H  | -4.16998400 | 3.58574600  | -3.19888400 |
| H  | -3.20183700 | 2.55871200  | -4.27692700 |
| C  | -1.46740900 | 3.54347900  | -2.39389300 |
| H  | -1.87767600 | 4.56125800  | -2.41287500 |
| H  | -0.70976700 | 3.49537300  | -1.60506100 |
| H  | -0.97132700 | 3.37565200  | -3.35756500 |
| C  | -0.73466400 | -1.42384200 | -3.84909900 |
| H  | -1.54987600 | -0.79646900 | -3.47634100 |
| C  | 0.56135500  | -0.58555800 | -3.75548600 |
| H  | 0.48059200  | 0.31442700  | -4.37809600 |
| H  | 0.73631000  | -0.27525500 | -2.71936400 |
| H  | 1.43135400  | -1.15736600 | -4.10297200 |
| C  | -1.06198600 | -1.78617100 | -5.31571800 |
| H  | -0.26328100 | -2.38244900 | -5.77333300 |
| H  | -1.99201700 | -2.36215400 | -5.38488600 |
| H  | -1.17951900 | -0.87457700 | -5.91408600 |
| C  | -2.22954100 | -4.12085900 | 0.27422700  |
| H  | -2.74126900 | -3.16984300 | 0.44982800  |
| C  | -1.38084300 | -4.41692100 | 1.53032600  |
| H  | -0.85164100 | -5.37439400 | 1.44667200  |
| H  | -0.64361200 | -3.62385900 | 1.69051200  |
| H  | -2.02567200 | -4.47037500 | 2.41595000  |
| C  | -3.30753400 | -5.21017700 | 0.05976100  |
| H  | -3.94573100 | -4.97548800 | -0.80010400 |
| H  | -2.84930900 | -6.19095200 | -0.11891700 |
| H  | -3.94712500 | -5.29344700 | 0.94686400  |
| C  | -4.53177200 | 0.11453700  | 1.92989800  |
| H  | -3.95953700 | -0.70709100 | 1.48727900  |
| C  | -4.18312600 | 0.15585200  | 3.43296200  |
| H  | -3.12510500 | 0.38822900  | 3.58479300  |
| H  | -4.78200400 | 0.89950100  | 3.97315200  |
| H  | -4.38588200 | -0.82056300 | 3.88853200  |
| C  | -6.03741800 | -0.19068000 | 1.73169100  |
| H  | -6.65640800 | 0.61287500  | 2.15032500  |
| H  | -6.28845600 | -0.29356100 | 0.67043000  |
| H  | -6.30743700 | -1.12605800 | 2.23694400  |
| Ni | -0.55397600 | -0.52080900 | 0.36167200  |
| C  | 4.64535600  | 0.29241200  | -1.92674400 |
| C  | 4.07752000  | 1.38858200  | -1.23772600 |
| C  | 4.55880500  | 2.68127300  | -1.47375200 |
| C  | 5.58608500  | 2.84691100  | -2.40056200 |
| C  | 6.13573500  | 1.74504600  | -3.08198500 |
| C  | 5.67806800  | 0.44742000  | -2.85281500 |
| C  | 3.04247800  | -0.37623600 | -0.52316800 |
| H  | 4.15901500  | 3.52880400  | -0.92182400 |
| H  | 5.97833100  | 3.84121700  | -2.59547800 |
| H  | 6.93928700  | 1.90642400  | -3.79502300 |
| H  | 6.11784900  | -0.39931900 | -3.37192600 |
| N  | 3.08161200  | 0.94124200  | -0.38194000 |
| N  | 3.95919400  | -0.81889400 | -1.46058200 |
| C  | 4.19911100  | -2.19608800 | -1.85498800 |
| H  | 4.92955200  | -2.68228600 | -1.19708900 |
| H  | 3.26362100  | -2.75813100 | -1.82624100 |
| H  | 4.58056200  | -2.21193000 | -2.87916400 |
| H  | -5.20824900 | -0.11514800 | -1.70885800 |
| H  | -4.06465200 | -2.44415800 | -2.66065800 |
| C  | 1.17226200  | -0.71887900 | 1.23936700  |
| C  | 2.13898300  | -1.33664800 | 0.19929400  |
| C  | 1.62081200  | -0.64850900 | 2.53137900  |
| C  | 0.68207100  | -0.17215400 | 3.68824100  |
| C  | -0.40268800 | -1.24837300 | 3.93958400  |
| H  | 0.04966200  | -2.21016300 | 4.20956400  |
| H  | -1.07377400 | -0.95077800 | 4.75851500  |
| H  | -0.99498100 | -1.39664800 | 3.03088600  |
| C  | -0.03477300 | 1.14901000  | 3.33408300  |
| H  | 0.69464100  | 1.96478800  | 3.20362100  |
| H  | -0.62679100 | 1.03481000  | 2.41684300  |
| H  | -0.71389900 | 1.45552600  | 4.14129100  |
| C  | 1.41992900  | 0.07791000  | 5.02395800  |
| H  | 0.69844700  | 0.40396400  | 5.78374900  |
| H  | 1.91133800  | -0.82069700 | 5.41148600  |
| H  | 2.17845600  | 0.86601200  | 4.93463800  |
| C  | 3.01490900  | -1.13090100 | 2.94854700  |
| H  | 3.71590500  | -1.01030700 | 2.11411900  |
| H  | 3.42288800  | -0.49649500 | 3.74419100  |
| C  | 3.08773700  | -2.59967000 | 3.42494200  |
| H  | 2.70209700  | -3.25687800 | 2.63231700  |
| H  | 2.41797100  | -2.74695200 | 4.28316000  |
| C  | 4.50523800  | -3.04162700 | 3.81379700  |
| H  | 5.17912600  | -2.89390500 | 2.95687800  |

|    |             |             |             |
|----|-------------|-------------|-------------|
| H  | 4.88306400  | -2.38459600 | 4.61056900  |
| C  | 4.58164000  | -4.50061300 | 4.27760500  |
| H  | 4.24359300  | -5.18524100 | 3.48945300  |
| H  | 5.60529400  | -4.78487600 | 4.54954600  |
| H  | 3.94477700  | -4.67025100 | 5.15479600  |
| H  | 1.53323300  | -1.84011200 | -0.56984800 |
| H  | 2.78016700  | -2.12990200 | 0.61617400  |
| Na | 1.03091700  | 1.70575500  | 0.58620200  |
| H  | 2.01212300  | 4.03011300  | -0.53260300 |
| O  | 1.33401600  | 3.96639500  | 0.16048300  |
| C  | 1.21611200  | 5.26482500  | 0.81061700  |
| C  | 2.53670200  | 5.58355500  | 1.52286200  |
| C  | 0.88887700  | 6.32005900  | -0.25304900 |
| C  | 0.06855200  | 5.11286100  | 1.80940900  |
| H  | 2.78336700  | 4.79837100  | 2.24514600  |
| H  | 3.36301000  | 5.66093600  | 0.80459100  |
| H  | 2.47198200  | 6.53764000  | 2.05792700  |
| H  | -0.03687000 | 6.06376100  | -0.77729400 |
| H  | 0.76848200  | 7.30876500  | 0.20335800  |
| H  | 1.69568600  | 6.39405700  | -0.99398400 |
| H  | -0.10274900 | 6.05767300  | 2.33603900  |
| H  | -0.85642800 | 4.82627600  | 1.29879200  |
| H  | 0.30086100  | 4.34592700  | 2.55624600  |

## TS<sub>19-20</sub>

|   |             |             |             |
|---|-------------|-------------|-------------|
| C | -1.91815100 | -0.09671500 | 0.62218300  |
| C | -3.48947100 | -0.44736200 | 2.32424600  |
| C | -4.02718900 | -0.94803400 | 1.18653100  |
| N | -3.09283800 | -0.73670700 | 0.15679300  |
| N | -2.22383000 | 0.06689200  | 1.99457000  |
| C | -3.37441600 | -1.10256700 | -1.21041400 |
| C | -4.09098700 | -0.19882400 | -2.03082800 |
| C | -2.99944300 | -2.38486800 | -1.67316200 |
| C | -4.41641900 | -0.60715800 | -3.33431800 |
| C | -3.34666300 | -2.74573600 | -2.98397900 |
| C | -4.04731600 | -1.86564700 | -3.80967800 |
| H | -4.96499600 | 0.06730200  | -3.98278900 |
| H | -3.06967000 | -3.72437600 | -3.36137400 |
| H | -4.30763200 | -2.16192900 | -4.82117900 |
| C | -1.40067400 | 0.76873900  | 2.94813500  |
| C | -0.52114100 | 0.03521600  | 3.77936500  |
| C | -1.54657600 | 2.17085300  | 3.07108800  |
| C | 0.25625000  | 0.74782500  | 4.70633000  |
| C | -0.74763900 | 2.83679500  | 4.01433600  |
| C | 0.15384900  | 2.13560200  | 4.81660300  |
| H | 0.94264500  | 0.21173900  | 5.35252900  |
| H | -0.83898000 | 3.91183300  | 4.12752100  |
| H | 0.76454400  | 2.66786000  | 5.53974800  |
| C | -2.27818000 | -3.38335900 | -0.76957000 |
| H | -1.87547500 | -2.81501200 | 0.07840400  |
| C | -3.26170300 | -4.43216600 | -0.19572400 |
| H | -4.06246200 | -3.95351900 | 0.37805900  |
| H | -3.72318300 | -5.01335800 | -1.00326100 |
| H | -2.73744800 | -5.13054600 | 0.46877100  |
| C | -1.09863900 | -4.08148100 | -1.48518200 |
| H | -1.45046400 | -4.78516500 | -2.24856800 |
| H | -0.44395000 | -3.35807700 | -1.98594900 |
| H | -0.51031300 | -4.66936900 | -0.76594700 |
| C | -0.47066000 | -1.49273000 | 3.74147100  |
| H | -0.87542000 | -1.80797000 | 2.77229100  |
| C | 0.95779600  | -2.06469900 | 3.86347800  |
| H | 0.92992100  | -3.15636400 | 3.75129500  |
| H | 1.62151100  | -1.66033700 | 3.09367300  |
| H | 1.39624900  | -1.85563200 | 4.84654600  |
| C | -1.37785600 | -2.09219600 | 4.84656400  |
| H | -1.02028600 | -1.79616100 | 5.84045300  |
| H | -2.41429300 | -1.75381600 | 4.74628700  |
| H | -1.37137800 | -3.18797000 | 4.79514100  |
| C | -2.59783300 | 2.94200300  | 2.27225200  |
| H | -2.92068700 | 2.30143700  | 1.44607200  |
| C | -2.05468300 | 4.24361000  | 1.64906400  |
| H | -1.75568800 | 4.97191000  | 2.41274100  |
| H | -1.18937000 | 4.03831900  | 1.01321300  |
| H | -2.83055200 | 4.71420900  | 1.03310400  |
| C | -3.83669700 | 3.23761200  | 3.15468700  |
| H | -4.27415700 | 2.31479100  | 3.55143200  |
| H | -3.56768700 | 3.87660300  | 4.00494900  |
| H | -4.60687300 | 3.75591800  | 2.57040400  |

|    |             |             |             |
|----|-------------|-------------|-------------|
| C  | -4.55417100 | 1.16532200  | -1.51763500 |
| H  | -3.97008500 | 1.39486400  | -0.62028600 |
| C  | -4.30576900 | 2.30462400  | -2.52983600 |
| H  | -3.25801800 | 2.33655400  | -2.84099300 |
| H  | -4.92674600 | 2.19537700  | -3.42717600 |
| H  | -4.55832100 | 3.26926000  | -2.07354300 |
| C  | -6.04967200 | 1.12402300  | -1.11532800 |
| H  | -6.67850900 | 0.88817100  | -1.98292000 |
| H  | -6.23842400 | 0.36822100  | -0.34558700 |
| H  | -6.36658500 | 2.09713700  | -0.72070400 |
| Ni | -0.43407900 | 0.40231500  | -0.28687400 |
| C  | 5.14688100  | -1.58947400 | 0.48492100  |
| C  | 4.03364300  | -2.35835900 | 0.89102100  |
| C  | 4.20681300  | -3.69710800 | 1.26281100  |
| C  | 5.49359100  | -4.22831500 | 1.21869100  |
| C  | 6.59385500  | -3.44788700 | 0.81436900  |
| C  | 6.44038100  | -2.11331000 | 0.44194200  |
| C  | 3.27330900  | -0.38107100 | 0.42699000  |
| H  | 3.35906100  | -4.29628300 | 1.58434300  |
| H  | 5.65518500  | -5.26398800 | 1.50424300  |
| H  | 7.58438400  | -3.89351000 | 0.79490500  |
| H  | 7.29510600  | -1.51588300 | 0.13836000  |
| N  | 2.88780900  | -1.57787300 | 0.84728100  |
| N  | 4.63120400  | -0.33512700 | 0.18480000  |
| C  | 5.40656900  | 0.79830400  | -0.29077400 |
| H  | 5.74768300  | 1.43071600  | 0.53738600  |
| H  | 6.27834200  | 0.42595400  | -0.83398600 |
| H  | 4.80832300  | 1.39531200  | -0.98017500 |
| H  | -4.97364000 | -1.42795700 | 1.00677700  |
| H  | -3.88085900 | -0.40222200 | 3.32564700  |
| C  | 1.44941300  | 0.89735600  | -0.94708400 |
| C  | 2.37914800  | 0.82104100  | 0.30047500  |
| C  | 1.35296400  | 2.10166700  | -1.60391500 |
| C  | 0.49996500  | 2.32041100  | -2.88087400 |
| C  | -0.38755700 | 3.58166500  | -2.72635100 |
| H  | 0.19375400  | 4.50038500  | -2.59242400 |
| H  | -0.99962700 | 3.71557200  | -3.62731500 |
| H  | -1.06392300 | 3.47858900  | -1.86999000 |
| C  | -0.43218400 | 1.14413200  | -3.20847800 |
| H  | 0.11074000  | 0.21107000  | -3.35835000 |
| H  | -1.14798700 | 0.96603900  | -2.39275700 |
| H  | -1.00148600 | 1.36602800  | -4.12119900 |
| C  | 1.44033300  | 2.52848400  | -4.09792300 |
| H  | 0.84803400  | 2.72042800  | -5.00146500 |
| H  | 2.12024600  | 3.37789500  | -3.96828800 |
| H  | 2.04676100  | 1.63516800  | -4.28031500 |
| C  | 2.15584300  | 3.33995400  | -1.18287800 |
| H  | 3.19756600  | 3.05354800  | -0.98082700 |
| H  | 2.21814000  | 4.05278200  | -2.01187800 |
| C  | 1.62066500  | 4.09811100  | 0.04923300  |
| H  | 1.47032700  | 3.40062800  | 0.88243500  |
| H  | 0.62907500  | 4.50423100  | -0.18475600 |
| C  | 2.54427100  | 5.24008000  | 0.49418300  |
| H  | 3.53752100  | 4.83131100  | 0.73226900  |
| H  | 2.69641300  | 5.93470900  | -0.34461400 |
| C  | 2.00926300  | 6.01156300  | 1.70582900  |
| H  | 1.87065700  | 5.34629800  | 2.56717100  |
| H  | 2.69499900  | 6.81201100  | 2.00771600  |
| H  | 1.03775800  | 6.47064400  | 1.48471700  |
| H  | 1.72963700  | 0.79318600  | 1.18659900  |
| H  | 3.01079100  | 1.70702400  | 0.42312200  |
| Na | 0.79230100  | -1.98747200 | -0.18672500 |
| H  | 1.42725200  | -0.30233700 | -1.71876100 |
| O  | 1.50002400  | -1.46188100 | -2.18341500 |
| C  | 2.37355800  | -1.88501800 | -3.21512700 |
| C  | 1.65351800  | -1.82937900 | -4.57945300 |
| C  | 3.64291800  | -1.01204700 | -3.26883700 |
| C  | 2.78283500  | -3.34451800 | -2.92724200 |
| H  | 0.72099100  | -2.40330200 | -4.53383100 |
| H  | 1.39882800  | -0.79859200 | -4.84656800 |
| H  | 2.27617100  | -2.24335500 | -5.38339100 |
| H  | 4.20659800  | -1.10192600 | -2.33474300 |
| H  | 4.29995400  | -1.31605700 | -4.09355300 |
| H  | 3.38175000  | 0.04170600  | -3.41334000 |
| H  | 3.45751300  | -3.73972600 | -3.69772800 |
| H  | 3.29358600  | -3.41231300 | -1.95941200 |
| H  | 1.89503900  | -3.98851200 | -2.89527100 |
| C  | 1.23238100  | -0.73232300 | -1.00654900 |
| C  | 2.33745200  | -0.92176200 | -3.03399800 |
| C  | 1.49381000  | -1.97878900 | -2.93825900 |
| N  | 0.82001900  | -1.85763500 | -1.71758900 |
| N  | 2.18000600  | -0.17206500 | -1.86169500 |
| C  | -0.14503500 | -2.86233700 | -1.29933000 |
| C  | 0.30398500  | -3.92993000 | -0.48344100 |
| C  | -1.46773400 | -2.79663900 | -1.80344200 |
| C  | -0.62645500 | -4.92525100 | -0.14815100 |
| C  | -2.35600400 | -3.81627600 | -1.42359000 |
| C  | -1.94265600 | -4.86643200 | -0.60623300 |
| H  | -0.31904400 | -5.75119300 | 0.48207900  |
| H  | -3.38650500 | -3.76905600 | -1.74772300 |
| H  | -2.65229500 | -5.63457900 | -0.31782600 |
| C  | 3.01234100  | 0.98670400  | -1.60507600 |
| C  | 2.47875600  | 2.28449300  | -1.79609300 |
| C  | 4.36876800  | 0.76811800  | -1.26975100 |
| C  | 3.34207100  | 3.37354700  | -1.60016700 |
| C  | 5.19018400  | 1.89562500  | -1.10025900 |
| C  | 4.68245300  | 3.18432600  | -1.25450900 |
| H  | 2.96762000  | 4.38134700  | -1.73154300 |
| H  | 6.23632700  | 1.75836900  | -0.84837000 |
| H  | 5.33158900  | 4.04335900  | -1.11659000 |
| C  | -1.94483500 | -1.69459000 | -2.75976500 |
| H  | -1.36160200 | -0.78710100 | -2.54578700 |
| C  | -1.68394600 | -2.07565000 | -4.24212100 |
| H  | -0.62288400 | -2.21067800 | -4.46699800 |
| H  | -2.20796100 | -3.00735300 | -4.48688500 |
| H  | -2.06968800 | -1.28819100 | -4.90054300 |
| C  | -3.44885800 | -1.35643100 | -2.59889400 |
| H  | -4.06557600 | -2.09761000 | -3.12432700 |
| H  | -3.79121400 | -1.34504600 | -1.55123700 |
| H  | -3.65443300 | -0.38493400 | -3.06522600 |
| C  | 1.03687000  | 2.49953200  | -2.26393000 |
| H  | 0.41538500  | 1.73562100  | -1.78161300 |
| C  | 0.46121300  | 3.87393100  | -1.86753600 |
| H  | -0.61373900 | 3.89663600  | -2.07500200 |
| H  | 0.60745000  | 4.07978000  | -0.80209400 |
| H  | 0.92297000  | 4.68832300  | -2.43927500 |
| C  | 0.91839000  | 2.31580500  | -3.79938500 |
| H  | 1.53578500  | 3.05593300  | -4.32341000 |
| H  | 1.23644800  | 1.31876200  | -4.11778100 |
| H  | -0.12201400 | 2.45508600  | -4.11614900 |
| C  | 4.97480200  | -0.63272600 | -1.14030300 |
| H  | 4.15905300  | -1.36171100 | -1.17536000 |
| C  | 5.71091000  | -0.84581500 | 0.20058900  |
| H  | 6.57898000  | -0.18378000 | 0.29742700  |
| H  | 5.04846000  | -0.66103400 | 1.05028600  |
| H  | 6.07435500  | -1.87835700 | 0.26458200  |
| C  | 5.92581500  | -0.93457900 | -2.32525600 |
| H  | 5.41669500  | -0.83702700 | -3.29042500 |
| H  | 6.77923800  | -0.24601600 | -2.32790300 |
| H  | 6.31663700  | -1.95596100 | -2.24835000 |
| C  | 1.76233400  | -4.05593900 | -0.03323500 |
| H  | 2.18609600  | -3.04616900 | 0.01705100  |
| C  | 1.91882600  | -4.68664600 | 1.36707700  |
| H  | 1.29664600  | -4.17926700 | 2.10941100  |
| H  | 1.65162700  | -5.74997400 | 1.36532100  |
| H  | 2.96397600  | -4.61578700 | 1.69005000  |
| C  | 2.58675500  | -4.86885400 | -1.06511400 |
| H  | 2.19124700  | -5.88803800 | -1.15307500 |
| H  | 2.56269700  | -4.40986200 | -2.05866600 |
| H  | 3.63462500  | -4.93721000 | -0.74797900 |
| Ni | 0.73103300  | -0.07907900 | 0.75967400  |
| C  | -3.20092500 | 4.08885000  | -0.10602900 |
| C  | -3.42019400 | 2.72575300  | -0.39695700 |
| C  | -4.50703000 | 2.34044000  | -1.19062400 |
| C  | -5.33146000 | 3.34606700  | -1.69001800 |
| C  | -5.09015400 | 4.70486400  | -1.40641600 |
| C  | -4.02115700 | 5.10300600  | -0.60491000 |
| C  | -1.67907900 | 2.80057500  | 0.88711900  |
| H  | -4.70643400 | 1.29020200  | -1.37960200 |
| H  | -6.18575000 | 3.07801100  | -2.30508100 |
| H  | -5.75620100 | 5.45990200  | -1.81470300 |
| H  | -3.84515500 | 6.15107500  | -0.38049700 |
| N  | -2.44782800 | 1.95485900  | 0.23016300  |
| N  | -2.08754400 | 4.11192900  | 0.72401800  |
| C  | -1.49522300 | 5.31661700  | 1.27458300  |

|    |             |             |             |
|----|-------------|-------------|-------------|
| H  | -1.03404200 | 5.92154200  | 0.48504600  |
| H  | -2.26313600 | 5.91618000  | 1.77485000  |
| H  | -0.73089000 | 5.05266400  | 2.00577400  |
| H  | 1.31414400  | -2.80026000 | -3.60737500 |
| H  | 3.03219900  | -0.63814700 | -3.80426600 |
| C  | -0.37614300 | 0.93722400  | 2.02352400  |
| C  | -0.49920200 | 2.43157600  | 1.74056500  |
| C  | 0.71388000  | 0.36347100  | 2.73089400  |
| C  | 0.43204400  | -0.86843100 | 3.65227400  |
| C  | 1.73139000  | -1.65093100 | 3.94110700  |
| H  | 2.46774200  | -1.04719800 | 4.48211200  |
| H  | 1.51440100  | -2.52894600 | 4.56225200  |
| H  | 2.19576700  | -2.00101800 | 3.01229700  |
| C  | -0.58442700 | -1.86161100 | 3.04633700  |
| H  | -1.58997600 | -1.43734100 | 2.95081000  |
| H  | -0.26991800 | -2.21433500 | 2.05792000  |
| H  | -0.68242400 | -2.73602200 | 3.70216800  |
| C  | -0.16026700 | -0.37959800 | 5.00016700  |
| H  | -0.37240100 | -1.23384800 | 5.65545000  |
| H  | 0.52343000  | 0.28404800  | 5.54119500  |
| H  | -1.10105800 | 0.15984800  | 4.84043800  |
| C  | 1.85544500  | 1.27699400  | 3.21320000  |
| H  | 1.59276900  | 2.32402100  | 3.02126900  |
| H  | 1.90980100  | 1.20280700  | 4.30882900  |
| C  | 3.28419800  | 1.07605000  | 2.67366600  |
| H  | 3.29972900  | 1.25296300  | 1.59045900  |
| H  | 3.60679500  | 0.03843900  | 2.82349700  |
| C  | 4.27280100  | 2.02310500  | 3.37402200  |
| H  | 3.95059600  | 3.06219100  | 3.21115000  |
| H  | 4.21514300  | 1.85752600  | 4.45988200  |
| C  | 5.72744600  | 1.86972400  | 2.91967300  |
| H  | 5.83071900  | 2.07529000  | 1.84813400  |
| H  | 6.38654500  | 2.56071200  | 3.45875900  |
| H  | 6.09488000  | 0.85202200  | 3.10039400  |
| H  | 0.41276800  | 2.81833300  | 1.26810200  |
| H  | -0.59166200 | 2.97643200  | 2.69611400  |
| Na | -2.36289200 | -0.41404300 | 0.36067500  |
| H  | -1.35440000 | 0.49129700  | 2.21094700  |
| O  | -4.11610400 | -1.47012400 | 0.53851600  |
| C  | -5.25360000 | -1.86620200 | 1.20001100  |
| C  | -5.48205500 | -3.39257100 | 1.02812200  |
| C  | -5.14676400 | -1.56032600 | 2.71891000  |
| C  | -6.49631000 | -1.12070900 | 0.64185600  |
| H  | -5.57699400 | -3.63309900 | -0.03873500 |
| H  | -4.61650100 | -3.94032300 | 1.42132500  |
| H  | -6.38414800 | -3.75516100 | 1.54200800  |
| H  | -4.99845000 | -0.48213900 | 2.86665700  |
| H  | -6.03702000 | -1.86449600 | 3.28859200  |
| H  | -4.27756300 | -2.08344400 | 3.13899200  |
| H  | -7.43241300 | -1.40169100 | 1.14635000  |
| H  | -6.35602800 | -0.03819400 | 0.75411700  |
| H  | -6.60753800 | -1.33738800 | -0.42852700 |

Cartesian coordinates for the stationary points given in Fig. 3

## 21

|   |             |             |             |
|---|-------------|-------------|-------------|
| C | 1.59229200  | -0.53629400 | 0.58237300  |
| C | 3.39882200  | -0.42192700 | -0.61241700 |
| C | 3.81108900  | -0.51130300 | 0.73425400  |
| C | 4.35390800  | -0.33563500 | -1.63150000 |
| C | 5.15581800  | -0.51422600 | 1.10814100  |
| C | 5.69829000  | -0.33865100 | -1.26835100 |
| H | 4.04956500  | -0.27042400 | -2.67244700 |
| C | 6.09365700  | -0.42653000 | 0.08052800  |
| H | 5.46539100  | -0.57655100 | 2.14718700  |
| H | 6.46021600  | -0.27126100 | -2.03965200 |
| H | 7.15168100  | -0.42386200 | 0.32625800  |
| C | 2.59649000  | -0.67211700 | 2.92668800  |
| H | 1.58478600  | -0.90304100 | 3.25839900  |
| H | 3.26575200  | -1.46785300 | 3.26915500  |
| H | 2.90869100  | 0.27572800  | 3.37902900  |
| N | 2.01291800  | -0.43873300 | -0.67199600 |
| C | 0.13378200  | -0.55469000 | 0.93604700  |
| C | -0.60951300 | -1.60786000 | 0.12135200  |

|    |             |             |             |
|----|-------------|-------------|-------------|
| H  | -0.25848400 | 0.46503300  | 0.72582000  |
| H  | -0.00777500 | -0.72858400 | 2.00931100  |
| C  | -1.93265700 | -1.85514800 | 0.15699400  |
| H  | 0.03177800  | -2.22759500 | -0.49797800 |
| N  | 2.63735400  | -0.58923300 | 1.47673500  |
| C  | -2.54204500 | -3.04787200 | -0.61227700 |
| C  | -1.58075100 | -3.64824700 | -1.65752600 |
| C  | -2.88491600 | -4.16315100 | 0.40969400  |
| C  | -3.83764000 | -2.63820500 | -1.35060800 |
| H  | -1.26200100 | -2.89787500 | -2.39137300 |
| H  | -0.68458300 | -4.08085700 | -1.20004400 |
| H  | -2.08621100 | -4.45259500 | -2.20398300 |
| H  | -3.60144300 | -3.82220900 | 1.16434600  |
| H  | -3.33018200 | -5.02493900 | -0.10292900 |
| H  | -1.98307100 | -4.50516900 | 0.93015000  |
| H  | -4.26149200 | -3.50777700 | -1.86731500 |
| H  | -4.60207600 | -2.25790700 | -0.66683500 |
| H  | -3.64131800 | -1.86414100 | -2.10146000 |
| C  | -2.85881900 | -1.03073500 | 1.03839000  |
| C  | -3.43371300 | 0.24779700  | 0.38361900  |
| H  | -2.32088100 | -0.73257800 | 1.94832000  |
| H  | -3.69441500 | -1.65464600 | 1.38151600  |
| C  | -4.36508900 | 1.00468700  | 1.34189900  |
| H  | -2.61449000 | 0.90599900  | 0.05969100  |
| H  | -3.99819100 | -0.02481900 | -0.51781100 |
| C  | -5.04944800 | 2.20931100  | 0.68736000  |
| H  | -5.13260400 | 0.31896800  | 1.73266400  |
| H  | -3.78704200 | 1.34346000  | 2.21390700  |
| H  | -5.69875800 | 2.73546700  | 1.39739500  |
| H  | -4.31020700 | 2.92579600  | 0.31249100  |
| H  | -5.66940000 | 1.89748000  | -0.16281100 |
| O  | -0.72742400 | 2.04241500  | -0.59743500 |
| C  | -0.62490000 | 3.40997900  | -0.41584500 |
| C  | -0.94982200 | 3.77541500  | 1.05492800  |
| C  | 0.81207500  | 3.90388400  | -0.73315700 |
| C  | -1.61485200 | 4.15460700  | -1.34662000 |
| H  | -1.96018200 | 3.43377200  | 1.30845800  |
| H  | -0.24628100 | 3.26738300  | 1.72705800  |
| H  | -0.89150900 | 4.85507400  | 1.25034700  |
| H  | 1.06044700  | 3.68163200  | -1.78176400 |
| H  | 0.94494900  | 4.98430700  | -0.58216800 |
| H  | 1.53423300  | 3.37759800  | -0.09549500 |
| H  | -1.57846400 | 5.24668700  | -1.22880200 |
| H  | -1.38828700 | 3.91657600  | -2.39479600 |
| H  | -2.63887800 | 3.81934500  | -1.14503300 |
| Na | 0.20780700  | 0.60748000  | -1.75875400 |

## TS<sub>21-22</sub>

|   |             |             |             |
|---|-------------|-------------|-------------|
| C | 1.43103900  | -0.49726200 | 0.51956300  |
| C | 3.34026400  | -0.81280500 | -0.49365000 |
| C | 3.64696000  | -0.46692600 | 0.84289900  |
| C | 4.37611700  | -1.08386700 | -1.39298700 |
| C | 4.95569100  | -0.37741900 | 1.31110100  |
| C | 5.69121900  | -0.99971200 | -0.93180300 |
| H | 4.15701500  | -1.36021700 | -2.42123700 |
| C | 5.97841700  | -0.65314700 | 0.39877500  |
| H | 5.18117200  | -0.10177000 | 2.33745400  |
| H | 6.51030700  | -1.20735400 | -1.61508500 |
| H | 7.01268000  | -0.59557500 | 0.72613800  |
| C | 2.23342100  | 0.03581000  | 2.86986800  |
| H | 1.25332100  | -0.31477600 | 3.19826300  |
| H | 2.99972000  | -0.47706200 | 3.45910800  |
| H | 2.30635400  | 1.11407800  | 3.05790100  |
| N | 1.96626200  | -0.81023300 | -0.67217800 |
| C | 0.00009500  | -0.30272300 | 0.71843400  |
| C | -0.84100000 | -1.37334200 | 0.10641500  |
| H | -0.24498900 | 0.88805600  | -0.00843800 |
| H | -0.28097200 | -0.04500900 | 1.74203800  |
| C | -2.17194000 | -1.58224300 | 0.23954900  |
| H | -0.27406900 | -2.08157300 | -0.49737500 |
| N | 2.41605900  | -0.27913800 | 1.46678200  |
| C | -2.86849900 | -2.81133700 | -0.37942400 |
| C | -1.99202700 | -3.55227100 | -1.40921200 |
| C | -3.21325100 | -3.81819900 | 0.74879300  |
| C | -4.17865400 | -2.40603200 | -1.09647400 |
| H | -1.69709900 | -2.89407500 | -2.23742500 |
| H | -1.08231600 | -3.96597600 | -0.96119700 |
| H | -2.55375200 | -4.38938800 | -1.83959700 |

|    |             |             |             |
|----|-------------|-------------|-------------|
| H  | -3.86623900 | -3.37342500 | 1.50740700  |
| H  | -3.73215100 | -4.69482000 | 0.34005100  |
| H  | -2.30249600 | -4.16341300 | 1.25095600  |
| H  | -4.67484500 | -3.29345500 | -1.50893000 |
| H  | -4.88724900 | -1.91993300 | -0.41895000 |
| H  | -3.97993100 | -1.71625200 | -1.92576900 |
| C  | -3.01461200 | -0.65700900 | 1.10499700  |
| C  | -3.52407400 | 0.61424300  | 0.38951500  |
| H  | -2.42648800 | -0.34240400 | 1.97868700  |
| H  | -3.87834900 | -1.19785900 | 1.51349900  |
| C  | -4.29200300 | 1.55368300  | 1.32911600  |
| H  | -2.67251600 | 1.14216100  | -0.05583700 |
| H  | -4.18058200 | 0.32670900  | -0.44286000 |
| C  | -4.85744400 | 2.78789600  | 0.61762100  |
| H  | -5.11402400 | 1.00276800  | 1.81007100  |
| H  | -3.62622500 | 1.87488000  | 2.14357900  |
| H  | -5.39307900 | 3.44389800  | 1.31413300  |
| H  | -4.05797300 | 3.37711200  | 0.15173600  |
| H  | -5.55903600 | 2.50041300  | -0.17553500 |
| O  | -0.46203800 | 1.71241800  | -0.92619600 |
| C  | -0.04067200 | 3.04656900  | -0.70161100 |
| C  | -0.40594700 | 3.48167300  | 0.73192900  |
| C  | 1.48402200  | 3.17111500  | -0.90592000 |
| C  | -0.77390600 | 3.94252200  | -1.71539200 |
| H  | -1.48312000 | 3.37312200  | 0.89850300  |
| H  | 0.11537600  | 2.86048100  | 1.47007700  |
| H  | -0.13182900 | 4.52731800  | 0.91798400  |
| H  | 1.75623200  | 2.89084600  | -1.93270200 |
| H  | 1.83999000  | 4.19515600  | -0.73582900 |
| H  | 2.02200300  | 2.50566700  | -0.22086200 |
| H  | -0.49666800 | 4.99834900  | -1.60306000 |
| H  | -0.53083600 | 3.63389700  | -2.74008700 |
| H  | -1.85769900 | 3.85145000  | -1.58438600 |
| Na | 0.27919300  | 0.01081200  | -2.04160900 |

**22**

|   |             |             |             |
|---|-------------|-------------|-------------|
| C | 1.24013400  | -0.79503300 | 0.66610300  |
| C | 3.14351800  | -1.15190500 | -0.37199600 |
| C | 3.47690800  | -0.73130200 | 0.94090400  |
| C | 4.16824100  | -1.45778600 | -1.27287600 |
| C | 4.79159400  | -0.60539400 | 1.37365100  |
| C | 5.49540700  | -1.33842800 | -0.84321600 |
| H | 3.93307500  | -1.79527600 | -2.27955700 |
| C | 5.80584900  | -0.92204000 | 0.45759200  |
| H | 5.03369700  | -0.27301700 | 2.37975800  |
| H | 6.30110000  | -1.57670300 | -1.53308000 |
| H | 6.84491200  | -0.83950000 | 0.76431600  |
| C | 2.08000900  | -0.24039300 | 2.98905900  |
| H | 1.16217200  | -0.72341100 | 3.33692900  |
| H | 2.92443200  | -0.65224700 | 3.55029300  |
| H | 2.01296700  | 0.83551000  | 3.20213700  |
| N | 1.77076900  | -1.16659800 | -0.53262700 |
| C | -0.14050200 | -0.64835400 | 0.93017400  |
| C | -1.10178100 | -1.42854200 | 0.17697600  |
| H | -0.06981100 | 1.35793800  | -0.11480700 |
| H | -0.44731900 | -0.17345200 | 1.85764400  |
| C | -2.46777500 | -1.40894200 | 0.20677000  |
| H | -0.63364500 | -2.18080000 | -0.46162600 |
| N | 2.25828600  | -0.51494000 | 1.58097000  |
| C | -3.31925400 | -2.43426300 | -0.56433700 |
| C | -2.52398100 | -3.19737500 | -1.64319600 |
| C | -3.88438900 | -3.48620400 | 0.42686200  |
| C | -4.50739500 | -1.74250800 | -1.27652900 |
| H | -2.09002300 | -2.51171300 | -2.38562100 |
| H | -1.71281400 | -3.79829200 | -1.21902700 |
| H | -3.18881000 | -3.88088800 | -2.18404800 |
| H | -4.49043800 | -3.01845700 | 1.21055300  |
| H | -4.52203100 | -4.21350000 | -0.09297100 |
| H | -3.06939500 | -4.03183500 | 0.91530400  |
| H | -5.12567700 | -2.48338300 | -1.79896900 |
| H | -5.15770800 | -1.21188200 | -0.57370500 |
| H | -4.15416700 | -1.01544500 | -2.01868100 |
| C | -3.19007000 | -0.45125000 | 1.14100800  |
| C | -3.40381000 | 0.97495100  | 0.58737900  |
| H | -2.63059400 | -0.36974800 | 2.08458700  |
| H | -4.17075600 | -0.85721800 | 1.42268200  |
| C | -4.06983500 | 1.91661400  | 1.59978500  |
| H | -2.43859700 | 1.39256800  | 0.27389600  |
| H | -4.02183900 | 0.92649700  | -0.31956600 |
| C | -4.31784200 | 3.32505300  | 1.04897700  |

|    |             |             |             |
|----|-------------|-------------|-------------|
| H  | -5.02509300 | 1.48045100  | 1.92660600  |
| H  | -3.44387100 | 1.98108600  | 2.50174600  |
| H  | -4.79461200 | 3.97134400  | 1.79540400  |
| H  | -3.37762000 | 3.80338800  | 0.74694900  |
| H  | -4.97066400 | 3.29652700  | 0.16760500  |
| O  | -0.09029000 | 1.80017700  | -0.99983200 |
| C  | 0.66952900  | 3.03530800  | -0.96119800 |
| C  | 0.01143700  | 3.98587600  | 0.04770600  |
| C  | 2.12194400  | 2.73416900  | -0.56955600 |
| C  | 0.58550400  | 3.60333600  | -2.37972900 |
| H  | -1.03339600 | 4.16930700  | -0.22327100 |
| H  | 0.03408100  | 3.55664300  | 1.05667800  |
| H  | 0.53638800  | 4.94731100  | 0.08138700  |
| H  | 2.58390400  | 2.03858500  | -1.27814200 |
| H  | 2.72008600  | 3.65230300  | -0.55027000 |
| H  | 2.17289000  | 2.27708100  | 0.42506800  |
| H  | 1.11563600  | 4.55916500  | -2.44513900 |
| H  | 1.04241200  | 2.91462500  | -3.10076300 |
| H  | -0.45874600 | 3.76553700  | -2.66767100 |
| Na | 0.10437800  | -0.28757100 | -1.82311400 |

**23**

|   |             |             |             |
|---|-------------|-------------|-------------|
| C | 2.07613900  | 0.66002100  | 0.08711800  |
| C | 3.77821400  | -0.70658300 | 0.34410000  |
| C | 4.29302000  | 0.46405200  | -0.26879700 |
| C | 4.64321600  | -1.76678900 | 0.63204200  |
| C | 5.63548500  | 0.60244700  | -0.60337600 |
| C | 5.99706100  | -1.63300300 | 0.30319900  |
| H | 4.26830900  | -2.66665400 | 1.11368100  |
| C | 6.48878600  | -0.46892700 | -0.30220700 |
| H | 6.01608300  | 1.50046400  | -1.08281500 |
| H | 6.68134100  | -2.44833900 | 0.52426000  |
| H | 7.54492900  | -0.39281700 | -0.54598600 |
| C | 3.25852500  | 2.68843500  | -0.86429400 |
| H | 3.09704700  | 2.77939300  | -1.94720200 |
| H | 2.49039800  | 3.26886100  | -0.34530700 |
| H | 4.23873700  | 3.11110100  | -0.62248000 |
| N | 2.41518100  | -0.58139700 | 0.53642200  |
| C | 0.77199400  | 1.20698100  | 0.06810600  |
| C | -0.24468500 | 0.81717100  | 1.00217400  |
| H | -2.08889300 | -1.10575800 | -0.00394000 |
| H | 0.59536900  | 2.05952500  | -0.57936900 |
| C | -1.54907500 | 1.24972000  | 1.08700000  |
| H | 0.10306200  | 0.12758400  | 1.77430200  |
| N | 3.20275200  | 1.31653200  | -0.41319700 |
| C | -2.43688700 | 0.94911500  | 2.31066900  |
| C | -1.92008900 | -0.23548700 | 3.15306600  |
| C | -2.48418200 | 2.19439300  | 3.23661900  |
| C | -3.88639900 | 0.61394700  | 1.88167600  |
| H | -1.81737300 | -1.14669400 | 2.54979900  |
| H | -0.94865800 | -0.02213800 | 3.61135400  |
| H | -2.62329500 | -0.45224000 | 3.96600600  |
| H | -2.87272900 | 3.07449300  | 2.71213300  |
| H | -3.13119000 | 2.01564700  | 4.10622200  |
| H | -1.48012100 | 2.43836500  | 3.60073400  |
| H | -4.52737600 | 0.46611500  | 2.76020900  |
| H | -4.33553100 | 1.40977000  | 1.27867600  |
| H | -3.92233300 | -0.31005200 | 1.28922400  |
| C | -2.04128600 | 2.29919000  | 0.09888400  |
| C | -2.43401800 | 1.75918000  | -1.29206000 |
| H | -1.26098300 | 3.06384000  | -0.04338500 |
| H | -2.90260700 | 2.84262800  | 0.50758700  |
| C | -2.82474900 | 2.85949400  | -2.28761900 |
| H | -1.59482100 | 1.17984400  | -1.70203800 |
| H | -3.27472300 | 1.05756800  | -1.18518900 |
| C | -3.22338200 | 2.31879900  | -3.66505900 |
| H | -3.65541900 | 3.44724700  | -1.87071900 |
| H | -1.98461400 | 3.55980800  | -2.39862900 |
| H | -3.49460500 | 3.12806600  | -4.35309800 |
| H | -2.39986300 | 1.75588100  | -4.12275500 |
| H | -4.08488000 | 1.64279900  | -3.59170900 |
| O | -1.67534100 | -1.91542900 | -0.36893900 |
| C | -2.67487800 | -2.87726800 | -0.79893200 |
| C | -3.37371600 | -3.46295600 | 0.43466400  |
| C | -3.67419100 | -2.18437000 | -1.73262500 |
| C | -1.88701100 | -3.95718000 | -1.54430800 |
| H | -2.64237700 | -3.92586100 | 1.10582000  |
| H | -3.90460800 | -2.68401800 | 0.99301100  |
| H | -4.10511700 | -4.22491400 | 0.14231000  |
| H | -3.15659600 | -1.73245800 | -2.58499400 |

|    |             |             |             |
|----|-------------|-------------|-------------|
| H  | -4.41044100 | -2.90071000 | -2.11378700 |
| H  | -4.22095900 | -1.39375200 | -1.20540100 |
| H  | -2.55646500 | -4.74308200 | -1.90837000 |
| H  | -1.36484200 | -3.52824700 | -2.40736400 |
| H  | -1.14865500 | -4.42441500 | -0.88159600 |
| Na | 0.47496700  | -1.45378700 | -0.19368100 |

### TS<sub>23-24</sub>

|    |             |             |             |
|----|-------------|-------------|-------------|
| C  | 2.06168200  | 0.53962200  | 0.21024400  |
| C  | 3.70704900  | -0.88395000 | 0.03296100  |
| C  | 4.28311600  | 0.40725300  | -0.02323000 |
| C  | 4.52762500  | -2.01355500 | -0.05574100 |
| C  | 5.65467800  | 0.60860100  | -0.16707100 |
| C  | 5.90217300  | -1.82081400 | -0.19746300 |
| H  | 4.10121100  | -3.01210200 | -0.00553000 |
| C  | 6.45848900  | -0.53102000 | -0.25095800 |
| H  | 6.08646000  | 1.60416000  | -0.21526800 |
| H  | 6.55768800  | -2.68463000 | -0.26615400 |
| H  | 7.53308800  | -0.41636300 | -0.36121100 |
| C  | 3.32510400  | 2.73483100  | 0.19266700  |
| H  | 3.41293100  | 3.20345100  | -0.79520500 |
| H  | 2.43734400  | 3.12396700  | 0.69508400  |
| H  | 4.20639000  | 2.99751900  | 0.78632400  |
| N  | 2.33128700  | -0.77728900 | 0.15539800  |
| C  | 0.74275600  | 1.10443200  | 0.32895900  |
| C  | -0.26890600 | 0.46326900  | 1.02130600  |
| H  | -1.96748200 | -0.49473200 | 0.15866900  |
| H  | 0.55476300  | 2.04998100  | -0.17052700 |
| C  | -1.68681600 | 0.69067600  | 0.99041300  |
| H  | 0.06194700  | -0.38858300 | 1.61969900  |
| N  | 3.21879600  | 1.29210700  | 0.09547800  |
| C  | -2.44074700 | 0.42445600  | 2.33902800  |
| C  | -1.94780300 | -0.87099400 | 3.02352000  |
| C  | -2.21432400 | 1.60157900  | 3.31851200  |
| C  | -3.96029800 | 0.26756700  | 2.10913700  |
| H  | -1.95139800 | -1.71438900 | 2.32379000  |
| H  | -0.93608300 | -0.76659200 | 3.43177000  |
| H  | -2.60404900 | -1.12689200 | 3.86427600  |
| H  | -2.59875000 | 2.54461600  | 2.91330000  |
| H  | -2.72306500 | 1.42221800  | 4.27542200  |
| H  | -1.14524800 | 1.73625200  | 3.52312100  |
| H  | -4.47552300 | 0.11280300  | 3.06552200  |
| H  | -4.40778500 | 1.15059100  | 1.64144400  |
| H  | -4.17828000 | -0.59410700 | 1.47023200  |
| C  | -2.11021600 | 1.97459100  | 0.25131400  |
| C  | -2.11500500 | 1.89990800  | -1.28772900 |
| H  | -1.46015000 | 2.81436800  | 0.55424600  |
| H  | -3.11731200 | 2.27386300  | 0.56307200  |
| C  | -2.39928400 | 3.25416100  | -1.95100800 |
| H  | -1.15321800 | 1.51513900  | -1.65259200 |
| H  | -2.86973600 | 1.17347200  | -1.61017900 |
| C  | -2.43526800 | 3.18504100  | -3.48167500 |
| H  | -3.35840300 | 3.64538100  | -1.58114800 |
| H  | -1.63678600 | 3.98198800  | -1.63621300 |
| H  | -2.64087000 | 4.16647400  | -3.92526400 |
| H  | -1.47767700 | 2.83179100  | -3.88533500 |
| H  | -3.21333200 | 2.49363700  | -3.82858900 |
| O  | -1.82421600 | -1.51359300 | -0.52763700 |
| C  | -2.87190100 | -2.31908400 | -1.04201000 |
| C  | -3.40580500 | -3.26711100 | 0.05065100  |
| C  | -4.01824900 | -1.45348700 | -1.59758500 |
| C  | -2.27749000 | -3.15888400 | -2.19097600 |
| H  | -2.58682900 | -3.87499100 | 0.45431300  |
| H  | -3.84222300 | -2.70119800 | 0.87981400  |
| H  | -4.17558400 | -3.94508600 | -0.33904800 |
| H  | -3.65473000 | -0.81184500 | -2.40741900 |
| H  | -4.83094600 | -2.07543500 | -1.99285600 |
| H  | -4.43543700 | -0.81057300 | -0.81557600 |
| H  | -3.02696300 | -3.81086400 | -2.65661200 |
| H  | -1.86898800 | -2.50091100 | -2.96815400 |
| H  | -1.46895300 | -3.80334700 | -1.81671400 |
| Na | 0.32125100  | -1.62059300 | -0.59683000 |

### 24

|   |            |            |            |
|---|------------|------------|------------|
| C | 1.96690500 | 0.64988800 | 0.12563600 |
|---|------------|------------|------------|

|    |             |             |             |
|----|-------------|-------------|-------------|
| C  | 3.55217700  | -0.80733600 | -0.14240800 |
| C  | 4.18293100  | 0.42819500  | 0.12523600  |
| C  | 4.32648200  | -1.95369900 | -0.35985800 |
| C  | 5.57104400  | 0.56394400  | 0.18464500  |
| C  | 5.71147900  | -1.82750200 | -0.30115000 |
| H  | 3.85620600  | -2.91258600 | -0.56098700 |
| C  | 6.32485400  | -0.58791700 | -0.03271400 |
| H  | 6.04834800  | 1.51810900  | 0.38707500  |
| H  | 6.33480600  | -2.70199000 | -0.46373800 |
| H  | 7.40865000  | -0.52792300 | 0.00483000  |
| C  | 3.31549200  | 2.73862100  | 0.64868500  |
| H  | 3.61114400  | 3.33710300  | -0.22069800 |
| H  | 2.37833100  | 3.12551000  | 1.05031300  |
| H  | 4.08550800  | 2.83036200  | 1.42052200  |
| N  | 2.17641900  | -0.63665700 | -0.14829800 |
| C  | 0.65315400  | 1.28386300  | 0.21313200  |
| C  | -0.43240400 | 0.62174800  | 0.65645600  |
| H  | -2.37525600 | 0.22217500  | 0.17013100  |
| H  | 0.57743100  | 2.31001400  | -0.13737300 |
| C  | -1.87086000 | 1.06292500  | 0.67523700  |
| H  | -0.29051900 | -0.38911600 | 1.02978500  |
| N  | 3.14990500  | 1.33929800  | 0.29409400  |
| C  | -2.46014200 | 1.06089700  | 2.14352100  |
| C  | -2.04876500 | -0.23941000 | 2.87199900  |
| C  | -1.95929900 | 2.27760800  | 2.94396300  |
| C  | -4.00132800 | 1.08493500  | 2.07223200  |
| H  | -2.18254100 | -1.11165100 | 2.22109300  |
| H  | -0.99962500 | -0.21259100 | 3.19102700  |
| H  | -2.65586900 | -0.37380300 | 3.77519000  |
| H  | -2.31054200 | 3.22392400  | 2.51616400  |
| H  | -2.32086100 | 2.22978300  | 3.97860400  |
| H  | -0.86296200 | 2.30731200  | 2.97692500  |
| H  | -4.42524900 | 1.06594900  | 3.08360200  |
| H  | -4.38808800 | 1.98132200  | 1.57577100  |
| H  | -4.38101300 | 0.20899100  | 1.53339200  |
| C  | -2.13724100 | 2.35890400  | -0.11851700 |
| C  | -2.10312900 | 2.17037600  | -1.64417900 |
| H  | -1.42313700 | 3.14276400  | 0.17366200  |
| H  | -3.12347700 | 2.75371400  | 0.14983600  |
| C  | -2.37005800 | 3.46587500  | -2.42246800 |
| H  | -1.13267200 | 1.75774400  | -1.95277600 |
| H  | -2.85257800 | 1.41688800  | -1.92438600 |
| C  | -2.35517600 | 3.26893200  | -3.94215600 |
| H  | -3.34197700 | 3.87841400  | -2.11630900 |
| H  | -1.61989600 | 4.22071300  | -2.14366600 |
| H  | -2.54758000 | 4.20938100  | -4.47145000 |
| H  | -1.38441100 | 2.88713700  | -4.28281200 |
| H  | -3.12019800 | 2.54756100  | -4.25420200 |
| O  | -1.67903300 | -2.16996100 | -0.22868900 |
| C  | -2.61091800 | -3.15147400 | -0.49813800 |
| C  | -2.73744800 | -4.12239700 | 0.70425200  |
| C  | -3.99768000 | -2.51393600 | -0.77285300 |
| C  | -2.20533600 | -3.97841600 | -1.75007800 |
| H  | -1.76150200 | -4.58072200 | 0.91272700  |
| H  | -3.04144300 | -3.56704300 | 1.59952300  |
| H  | -3.46607000 | -4.92807400 | 0.53542000  |
| H  | -3.92209500 | -1.81770900 | -1.61763900 |
| H  | -4.77579500 | -3.25496800 | -1.00375000 |
| H  | -4.32084200 | -1.94170700 | 0.10555300  |
| H  | -2.92825900 | -4.76330200 | -2.01309200 |
| H  | -2.10042900 | -3.30954500 | -2.61554400 |
| H  | -1.23514500 | -4.46845900 | -1.57319900 |
| Na | 0.29538000  | -1.90911100 | -0.77395000 |

### P2

|   |            |             |             |
|---|------------|-------------|-------------|
| C | 1.30035700 | -0.02065700 | 0.03421900  |
| C | 3.27300500 | -0.53138800 | -0.65046900 |
| C | 3.45254400 | 0.43769100  | 0.36801200  |
| C | 4.39177500 | -1.06965300 | -1.30236800 |
| C | 4.71588000 | 0.88333400  | 0.76437900  |
| C | 5.65273200 | -0.62740300 | -0.91555800 |
| H | 4.26199900 | -1.81140400 | -2.08457200 |
| C | 5.81295600 | 0.33459200  | 0.10288500  |
| H | 4.84891800 | 1.61792700  | 1.55371100  |
| H | 6.53543800 | -1.03033900 | -1.40462400 |
| H | 6.81374600 | 0.65334200  | 0.38109800  |
| C | 1.85594300 | 1.70442100  | 1.84409400  |
| H | 1.84753100 | 1.22354700  | 2.83019300  |

|   |             |             |             |
|---|-------------|-------------|-------------|
| H | 2.60473600  | 2.50120500  | 1.84960500  |
| H | 0.88164300  | 2.16236300  | 1.66362100  |
| N | 1.93179100  | -0.79357900 | -0.83109800 |
| C | -0.14662000 | 0.02744200  | 0.21177600  |
| C | -0.99043100 | -0.68211300 | -0.55795200 |
| H | -2.87491100 | -0.82163000 | -1.47879400 |
| H | -0.52678900 | 0.66174200  | 1.00708900  |
| C | -2.49793600 | -0.75406600 | -0.44546400 |
| H | -0.53375200 | -1.29107800 | -1.33512100 |
| N | 2.17267600  | 0.76280000  | 0.78669600  |
| C | -2.96078600 | -2.10770100 | 0.23668000  |
| C | -2.22982000 | -3.29899700 | -0.41976600 |
| C | -2.65600200 | -2.10451200 | 1.74598500  |
| C | -4.47479500 | -2.31188300 | 0.01803300  |
| H | -2.36709300 | -3.30083900 | -1.50887800 |
| H | -1.15453300 | -3.28584300 | -0.21554700 |
| H | -2.62826100 | -4.24531900 | -0.03466200 |
| H | -3.22147800 | -1.32848100 | 2.27442500  |
| H | -2.92835200 | -3.06933900 | 2.19079800  |
| H | -1.58963000 | -1.93836400 | 1.93494500  |
| H | -4.78686400 | -3.28175300 | 0.42392800  |
| H | -5.08023700 | -1.54550200 | 0.51285100  |
| H | -4.72601800 | -2.30339900 | -1.05013300 |
| C | -3.12702300 | 0.51118700  | 0.17927100  |
| C | -3.03131000 | 1.75488600  | -0.71833500 |
| H | -2.66631300 | 0.72601300  | 1.15255300  |
| H | -4.18563600 | 0.32367600  | 0.39179100  |
| C | -3.64301200 | 3.01004800  | -0.08185000 |
| H | -1.98155200 | 1.95015400  | -0.97377300 |
| H | -3.54199500 | 1.54860700  | -1.67073200 |
| C | -3.57275100 | 4.24210700  | -0.99063000 |
| H | -4.69131300 | 2.81027500  | 0.18293000  |
| H | -3.12784200 | 3.22496700  | 0.86584000  |
| H | -4.01374900 | 5.12193400  | -0.50803000 |
| H | -2.53465000 | 4.48721400  | -1.24708400 |
| H | -4.11254200 | 4.07178300  | -1.93024200 |

Cartesian coordinates for the stationary points given in Fig. 5.

**T<sub>1h</sub>**

|   |             |            |             |
|---|-------------|------------|-------------|
| C | 0.04812400  | 2.95701600 | 0.03750000  |
| C | 0.77452500  | 5.14391400 | 0.28053600  |
| C | -0.54813500 | 5.19594300 | -0.00709500 |
| N | -0.98833000 | 3.86624200 | -0.14244300 |
| N | 1.13556800  | 3.78411800 | 0.29585900  |
| C | -2.37046000 | 3.53822600 | -0.42826800 |
| C | -2.73718800 | 3.20199800 | -1.75300400 |
| C | -3.32378100 | 3.62778000 | 0.61472800  |
| C | -4.09142100 | 2.93645800 | -2.00960100 |
| C | -4.66577200 | 3.35889600 | 0.29980600  |
| C | -5.04758900 | 3.01296200 | -0.99635400 |
| H | -4.40141500 | 2.67397600 | -3.01429700 |
| H | -5.41775500 | 3.42013700 | 1.07841900  |
| H | -6.09050000 | 2.80888800 | -1.21798000 |
| C | 2.49612800  | 3.34865300 | 0.54235700  |
| C | 2.83913900  | 2.85837000 | 1.82458200  |
| C | 3.45433800  | 3.48350600 | -0.49092600 |
| C | 4.17243100  | 2.47885400 | 2.04435100  |
| C | 4.77526500  | 3.09522100 | -0.21337800 |
| C | 5.13163500  | 2.59190100 | 1.03742500  |
| H | 4.46366300  | 2.09360100 | 3.01437300  |
| H | 5.53056000  | 3.18616000 | -0.98607200 |
| H | 6.15663300  | 2.29058400 | 1.22914400  |
| C | -2.95221900 | 4.04912200 | 2.03950800  |
| H | -1.86936200 | 3.92674900 | 2.15433500  |
| C | -3.29249200 | 5.54158300 | 2.28407300  |
| H | -2.77702600 | 6.19985500 | 1.57773600  |
| H | -4.37054600 | 5.71267500 | 2.17761900  |
| H | -3.00019400 | 5.83829600 | 3.29849600  |
| C | -3.63428300 | 3.18244300 | 3.12281700  |
| H | -4.71680500 | 3.35284300 | 3.15460400  |
| H | -3.46529800 | 2.11491900 | 2.95457700  |
| H | -3.23455700 | 3.44122200 | 4.11025700  |
| C | 1.82530600  | 2.80874200 | 2.96915600  |
| H | 0.82875900  | 2.71428000 | 2.52774200  |

|    |             |             |             |
|----|-------------|-------------|-------------|
| C  | 2.02084200  | 1.59604700  | 3.90304300  |
| H  | 1.18583900  | 1.53610300  | 4.61076200  |
| H  | 2.05885600  | 0.65992300  | 3.33705100  |
| H  | 2.94106200  | 1.67664500  | 4.49405700  |
| C  | 1.86410200  | 4.12743900  | 3.78311800  |
| H  | 2.85039800  | 4.27102800  | 4.24149300  |
| H  | 1.65456600  | 4.99705600  | 3.15051300  |
| H  | 1.11655100  | 4.10288000  | 4.58534000  |
| C  | 3.11406600  | 4.07872900  | -1.86053800 |
| H  | 2.02494500  | 4.05051100  | -1.97796900 |
| C  | 3.72742700  | 3.28429300  | -3.03612300 |
| H  | 4.81970800  | 3.37466000  | -3.05849000 |
| H  | 3.47818800  | 2.22080900  | -2.98168800 |
| H  | 3.34860800  | 3.67775900  | -3.98679500 |
| C  | 3.56422800  | 5.55938600  | -1.94888500 |
| H  | 3.10156600  | 6.17526800  | -1.17119000 |
| H  | 4.65224700  | 5.63780900  | -1.83553800 |
| H  | 3.29273600  | 5.98275100  | -2.92331100 |
| C  | -1.72291900 | 3.19506500  | -2.89779300 |
| H  | -0.73259700 | 3.02652300  | -2.46499800 |
| C  | -1.96804900 | 2.06295100  | -3.91763200 |
| H  | -2.03990000 | 1.08995400  | -3.42112900 |
| H  | -2.88633300 | 2.22193900  | -4.49553300 |
| H  | -1.13800700 | 2.02330500  | -4.63246600 |
| C  | -1.70280500 | 4.57087000  | -3.61124500 |
| H  | -2.68024200 | 4.79164400  | -4.05772000 |
| H  | -1.45809500 | 5.38032900  | -2.91463100 |
| H  | -0.95425500 | 4.57417800  | -4.41284900 |
| Ni | -0.00866300 | 0.98730400  | -0.04967300 |
| C  | 1.23568800  | -0.28258200 | -0.85128600 |
| C  | 0.95083700  | 0.69006500  | -1.79751300 |
| H  | 1.66925100  | 1.47249500  | -2.03037200 |
| H  | 0.21264800  | 0.50606500  | -2.58025400 |
| C  | 2.03711300  | -1.24096700 | -0.38270500 |
| C  | 3.13577100  | -1.86756200 | -1.29344400 |
| C  | 3.75403500  | -0.83479800 | -2.24890400 |
| H  | 3.00578700  | -0.43159600 | -2.93504400 |
| H  | 4.18730000  | -0.00735800 | -1.67880200 |
| H  | 4.54390800  | -1.30144400 | -2.84563900 |
| C  | 2.53791200  | -3.03106400 | -2.10898600 |
| H  | 3.29228600  | -3.47647100 | -2.77118200 |
| H  | 2.14534300  | -3.81384300 | -1.45478500 |
| H  | 1.71646500  | -2.66543800 | -2.73322800 |
| C  | 1.95402500  | -1.72543700 | 1.05586800  |
| H  | 2.92331700  | -1.53309300 | 1.53451300  |
| H  | 1.21254600  | -1.10741200 | 1.56932200  |
| C  | 1.59214300  | -3.20417400 | 1.28398000  |
| H  | 2.33589800  | -3.84959100 | 0.80289300  |
| H  | 0.62578900  | -3.41870200 | 0.80995400  |
| C  | 1.51439200  | -3.56362100 | 2.77442900  |
| H  | 2.47881500  | -3.33788900 | 3.25237300  |
| H  | 0.77284500  | -2.91748500 | 3.26645400  |
| C  | 1.15365300  | -5.03225000 | 3.02366200  |
| H  | 1.89401400  | -5.70390000 | 2.57066200  |
| H  | 1.10905100  | -5.26064100 | 4.09526500  |
| H  | 0.17681400  | -5.27771800 | 2.58907600  |
| H  | 1.48762100  | 5.92522300  | 0.47384400  |
| H  | -1.21349300 | 6.03199600  | -0.12845400 |
| C  | -1.25108000 | -0.34057500 | 0.63552000  |
| C  | -0.99955700 | 0.57863900  | 1.64781400  |
| H  | -1.73566300 | 1.33447500  | 1.91226600  |
| H  | -0.28468600 | 0.35105600  | 2.44125100  |
| C  | -2.03947500 | -1.28521700 | 0.11668000  |
| C  | -3.13335200 | -1.96975400 | 0.99381700  |
| C  | -3.78792300 | -0.98698300 | 1.97522800  |
| H  | -3.05700300 | -0.63794600 | 2.70761200  |
| H  | -4.18872000 | -0.11157200 | 1.45689500  |
| H  | -4.59878800 | -1.48349300 | 2.52004400  |
| C  | -2.51014600 | -3.13210400 | 1.79198400  |
| H  | -3.26804600 | -3.61009300 | 2.42528700  |
| H  | -2.10129500 | -3.88880800 | 1.11767500  |
| H  | -1.70122500 | -2.76385000 | 2.43115800  |
| C  | -1.93566300 | -1.71302200 | -1.33838500 |
| H  | -2.89580300 | -1.50256000 | -1.82982200 |
| H  | -1.18681800 | -1.07616100 | -1.81710000 |
| C  | -1.57623200 | -3.18391600 | -1.61967900 |
| H  | -2.32814600 | -3.84061500 | -1.16890100 |
| H  | -0.61372900 | -3.41836100 | -1.14659400 |
| C  | -1.48697500 | -3.48390500 | -3.12247400 |
| H  | -2.44858500 | -3.23996600 | -3.59720100 |

|    |             |             |             |
|----|-------------|-------------|-------------|
| H  | -0.74298800 | -2.81852400 | -3.58498400 |
| C  | -1.12409800 | -4.94160000 | -3.42721900 |
| H  | -1.86639100 | -5.63012900 | -3.00431500 |
| H  | -1.07326100 | -5.12788800 | -4.50675600 |
| H  | -0.14940800 | -5.20377900 | -2.99721500 |
| O  | -4.10688400 | -2.55641900 | 0.11437100  |
| Si | -5.76913000 | -2.42102100 | -0.24611100 |
| C  | -6.54509700 | -0.71106300 | 0.11075700  |
| H  | -7.53930300 | -0.66747800 | -0.35115100 |
| H  | -6.66209000 | -0.50127900 | 1.17805100  |
| H  | -5.94154000 | 0.09163200  | -0.32705400 |
| C  | -5.84698300 | -2.70773800 | -2.12828100 |
| H  | -5.33030100 | -1.89802200 | -2.65600700 |
| H  | -5.36041400 | -3.64765400 | -2.40927200 |
| H  | -6.88080400 | -2.73771600 | -2.49159300 |
| C  | -6.75530700 | -3.81668300 | 0.68415000  |
| C  | -8.22478900 | -3.80275000 | 0.21273600  |
| H  | -8.31280900 | -3.97339800 | -0.86714400 |
| H  | -8.79145200 | -4.59997800 | 0.71557900  |
| H  | -8.72429100 | -2.85374300 | 0.44521400  |
| C  | -6.72073200 | -3.59562100 | 2.20862500  |
| H  | -7.29978700 | -4.37831500 | 2.72032600  |
| H  | -5.69846700 | -3.63655300 | 2.60159800  |
| H  | -7.15546000 | -2.62957800 | 2.49475100  |
| C  | -6.13098000 | -5.18921600 | 0.36221000  |
| H  | -6.66933400 | -5.98808400 | 0.89330000  |
| H  | -6.17894700 | -5.41928300 | -0.70919400 |
| H  | -5.07918800 | -5.23305300 | 0.66601900  |
| O  | 4.17273800  | -2.33403000 | -0.41101100 |
| Si | 5.50705500  | -3.38628400 | -0.61160500 |
| C  | 4.96510800  | -5.21248200 | -0.47727200 |
| H  | 5.84024800  | -5.87357600 | -0.46789200 |
| H  | 4.39363700  | -5.39937100 | 0.43808400  |
| H  | 4.33888500  | -5.50703900 | -1.32645700 |
| C  | 6.43233700  | -3.17704100 | -2.27238300 |
| H  | 5.79200600  | -3.40802100 | -3.13060600 |
| H  | 6.82383200  | -2.16343000 | -2.40765700 |
| H  | 7.28152900  | -3.87068000 | -2.30494800 |
| C  | 6.66890100  | -2.89815500 | 0.86214000  |
| C  | 7.97374900  | -3.71873100 | 0.80681800  |
| H  | 8.53990200  | -3.53261100 | -0.11432100 |
| H  | 8.62639100  | -3.44906100 | 1.64981600  |
| H  | 7.78754300  | -4.79817000 | 0.87465900  |
| C  | 5.95660900  | -3.16976700 | 2.20219600  |
| H  | 6.59907400  | -2.86837100 | 3.04280300  |
| H  | 5.01914600  | -2.60833000 | 2.27809700  |
| H  | 5.72462000  | -4.23375900 | 2.33420800  |
| C  | 7.00677400  | -1.39630300 | 0.76882200  |
| H  | 7.65137000  | -1.09851600 | 1.60923300  |
| H  | 7.54552700  | -1.15569300 | -0.15667200 |
| H  | 6.10035000  | -0.78224400 | 0.80015300  |

### TS<sub>1h-25</sub>

|   |             |             |             |
|---|-------------|-------------|-------------|
| C | 0.88910200  | -1.27793300 | -0.00020000 |
| C | 1.30626300  | -3.57014100 | -0.21900500 |
| C | 2.47929000  | -2.98271000 | 0.12405500  |
| N | 2.23253200  | -1.60588400 | 0.25653900  |
| N | 0.34446000  | -2.54482300 | -0.29456000 |
| C | 3.25565200  | -0.64662200 | 0.59555200  |
| C | 4.05315900  | -0.10225800 | -0.43839400 |
| C | 3.45338200  | -0.30019200 | 1.95191200  |
| C | 5.06855200  | 0.79944200  | -0.08144700 |
| C | 4.47590300  | 0.61294400  | 2.25522500  |
| C | 5.27913700  | 1.15637200  | 1.25159400  |
| H | 5.69562100  | 1.22867500  | -0.85603200 |
| H | 4.64213000  | 0.90094400  | 3.28815900  |
| H | 6.06670500  | 1.85850400  | 1.50754000  |
| C | -1.03300500 | -2.75709900 | -0.63777400 |
| C | -1.95601400 | -3.08829300 | 0.38598900  |
| C | -1.43612800 | -2.62217200 | -1.99088300 |
| C | -3.30857800 | -3.24367500 | 0.03144300  |
| C | -2.80122700 | -2.78192200 | -2.29134900 |
| C | -3.73131800 | -3.08319700 | -1.29127000 |
| H | -4.03485000 | -3.49249100 | 0.79777400  |
| H | -3.13608500 | -2.67888200 | -3.31824200 |
| H | -4.78008600 | -3.20167200 | -1.54383000 |
| C | 2.59174100  | -0.87442800 | 3.07578200  |
| H | 1.89572600  | -1.59152600 | 2.62950300  |
| C | 3.44323100  | -1.63564500 | 4.11810100  |

|    |             |             |             |
|----|-------------|-------------|-------------|
| H  | 4.01975000  | -2.44183500 | 3.64962800  |
| H  | 4.15024600  | -0.96792200 | 4.62462400  |
| H  | 2.79618700  | -2.07831700 | 4.88499600  |
| C  | 1.73909200  | 0.22842200  | 3.74562300  |
| H  | 2.37074800  | 0.99744800  | 4.20687200  |
| H  | 1.08984400  | 0.71146900  | 3.00720900  |
| H  | 1.10748400  | -0.20459700 | 4.53122600  |
| C  | -1.52060200 | -3.28507300 | 1.83792500  |
| H  | -0.45007500 | -3.06801600 | 1.89534100  |
| C  | -2.23541000 | -2.30579100 | 2.79643800  |
| H  | -1.87767600 | -2.45488400 | 3.82195600  |
| H  | -2.02918300 | -1.26652500 | 2.51658800  |
| H  | -3.32160700 | -2.45805000 | 2.79760400  |
| C  | -1.72874800 | -4.75194900 | 2.28442900  |
| H  | -2.78953700 | -5.02958800 | 2.26303200  |
| H  | -1.18593600 | -5.44717400 | 1.63393100  |
| H  | -1.36618900 | -4.89024300 | 3.30966500  |
| C  | -0.43960900 | -2.32798200 | -3.11229800 |
| H  | 0.54705900  | -2.20922200 | -2.65554600 |
| C  | -0.76237200 | -1.00587300 | -3.84558300 |
| H  | -1.75384700 | -1.03257600 | -4.31496600 |
| H  | -0.72049600 | -0.15869900 | -3.15049900 |
| H  | -0.02507200 | -0.82490600 | -4.63643700 |
| C  | -0.36183000 | -3.51265100 | -4.10502800 |
| H  | -0.09446500 | -4.44427200 | -3.59339800 |
| H  | -1.31956700 | -3.67138300 | -4.61533400 |
| H  | 0.39675200  | -3.31381600 | -4.87097800 |
| C  | 3.84274900  | -0.46874200 | -1.90756200 |
| H  | 2.93763300  | -1.08102300 | -1.97019100 |
| C  | 3.60660900  | 0.78057500  | -2.78640800 |
| H  | 2.76615400  | 1.37214000  | -2.40981100 |
| H  | 4.49175400  | 1.42746500  | -2.81688400 |
| H  | 3.38212600  | 0.47803300  | -3.81654900 |
| C  | 5.02139600  | -1.31169500 | -2.45025100 |
| H  | 5.96099500  | -0.74704300 | -2.41245600 |
| H  | 5.15777900  | -2.22964300 | -1.86685000 |
| H  | 4.84037500  | -1.59431400 | -3.49442900 |
| Ni | 0.16900400  | 0.37258000  | -0.00690200 |
| C  | -0.31908600 | 4.40109500  | -0.55200000 |
| C  | 0.41175600  | 3.23569300  | -0.24597700 |
| C  | 1.80384600  | 3.29960200  | -0.11333600 |
| C  | 2.42446600  | 4.53439800  | -0.29829900 |
| C  | 1.68298000  | 5.69002900  | -0.60836100 |
| C  | 0.29532600  | 5.64157500  | -0.73878800 |
| C  | -1.73678200 | 2.64247600  | -0.33544300 |
| H  | 2.37692900  | 2.41057400  | 0.12969400  |
| H  | 3.50434000  | 4.60659400  | -0.19831200 |
| H  | 2.19933300  | 6.63667700  | -0.74479200 |
| H  | -0.27877800 | 6.53371300  | -0.97381100 |
| H  | -3.09149700 | 1.95947800  | -0.11371900 |
| N  | -0.48437700 | 2.16581800  | -0.12557800 |
| N  | -1.64287000 | 3.99451200  | -0.60263100 |
| C  | -2.75863700 | 4.86273000  | -0.91524000 |
| H  | -2.89662300 | 5.62886300  | -0.14163500 |
| H  | -2.59800600 | 5.36609200  | -1.87636000 |
| H  | -3.66176300 | 4.25529700  | -0.98313100 |
| H  | 3.45626400  | -3.40409200 | 0.28773800  |
| H  | 1.06269000  | -4.60049300 | -0.41378100 |
| O  | -3.97893700 | 1.25382300  | -0.03669900 |
| C  | -4.89292000 | 1.50079600  | 1.02437600  |
| C  | -5.74448800 | 0.23330400  | 1.20096100  |
| C  | -4.13229700 | 1.81031400  | 2.32868300  |
| C  | -5.80989300 | 2.68357200  | 0.65625800  |
| H  | -6.26628300 | -0.00437800 | 0.26644800  |
| H  | -5.10798100 | -0.62064400 | 1.46409500  |
| H  | -6.49356400 | 0.35641200  | 1.99288100  |
| H  | -3.50615300 | 2.70146600  | 2.21097600  |
| H  | -4.82193200 | 1.98539400  | 3.16385700  |
| H  | -3.47506600 | 0.97461300  | 2.59692500  |
| H  | -6.57637300 | 2.85572500  | 1.42251300  |
| H  | -5.22806500 | 3.60625300  | 0.55291300  |
| H  | -6.31117400 | 2.48684700  | -0.29800500 |
| Na | -2.38669700 | -0.15676500 | -0.51945100 |

### 25

|   |             |             |             |
|---|-------------|-------------|-------------|
| C | -1.04797500 | -1.19952200 | 0.03410900  |
| C | -1.60718100 | -3.45076300 | 0.34072900  |
| C | -2.73616200 | -2.80879500 | -0.05023800 |
| N | -2.40321600 | -1.45600700 | -0.23653600 |



|    |             |             |             |
|----|-------------|-------------|-------------|
| N  | -0.58548400 | -2.48359400 | 0.39118300  |
| C  | -3.35504800 | -0.45100600 | -0.64248900 |
| C  | -4.12509700 | 0.20276800  | 0.34759100  |
| C  | -3.51092300 | -0.16569100 | -2.01820300 |
| C  | -5.07269400 | 1.14915600  | -0.07386100 |
| C  | -4.46680200 | 0.79418200  | -2.38748800 |
| C  | -5.24382900 | 1.44403000  | -1.42753900 |
| H  | -5.67777700 | 1.66305300  | 0.66598600  |
| H  | -4.60006400 | 1.03571300  | -3.43704700 |
| H  | -5.97961200 | 2.18159800  | -1.73331400 |
| C  | 0.77312900  | -2.75620000 | 0.76590400  |
| C  | 1.68775100  | -3.19076900 | -0.22564100 |
| C  | 1.16915500  | -2.57060200 | 2.11495400  |
| C  | 3.02686200  | -3.39588000 | 0.15336400  |
| C  | 2.52020700  | -2.78669600 | 2.44178000  |
| C  | 3.44400900  | -3.18735700 | 1.47106500  |
| H  | 3.74704500  | -3.72233200 | -0.58958300 |
| H  | 2.84901500  | -2.64837400 | 3.46653100  |
| H  | 4.48230500  | -3.34759500 | 1.74358200  |
| C  | -2.66564400 | -0.84706300 | -3.09354200 |
| H  | -2.03559000 | -1.59295500 | -2.59915700 |
| C  | -3.54040300 | -1.58765900 | -4.13109000 |
| H  | -4.19091100 | -2.32676900 | -3.64917100 |
| H  | -4.17817700 | -0.89208200 | -4.68941000 |
| H  | -2.90567900 | -2.11101300 | -4.85632400 |
| C  | -1.71934000 | 0.16648000  | -3.77914000 |
| H  | -2.28419300 | 0.95959200  | -4.28429000 |
| H  | -1.05674700 | 0.63099100  | -3.04050100 |
| H  | -1.10052200 | -0.33907000 | -4.53109400 |
| C  | 1.26081300  | -3.43248400 | -1.67348000 |
| H  | 0.19026600  | -3.21977000 | -1.74360800 |
| C  | 1.97877200  | -2.47373500 | -2.65084200 |
| H  | 1.64023400  | -2.65692800 | -3.67749000 |
| H  | 1.75376700  | -1.42999500 | -2.40273900 |
| H  | 3.06663600  | -2.61401000 | -2.62763500 |
| C  | 1.47433200  | -4.90889200 | -2.08217900 |
| H  | 2.53580800  | -5.18341400 | -2.05792600 |
| H  | 0.93583400  | -5.58907000 | -1.41246800 |
| H  | 1.10952600  | -5.07467100 | -3.10254300 |
| C  | 0.17825500  | -2.16540200 | 3.20587700  |
| H  | -0.78954900 | -1.99459300 | 2.72623100  |
| C  | 0.58155700  | -0.84356400 | 3.89832700  |
| H  | 1.55477700  | -0.92726300 | 4.39841300  |
| H  | 0.62434700  | -0.02374100 | 3.17152700  |
| H  | -0.16073000 | -0.57675500 | 4.65977900  |
| C  | 0.00064500  | -3.30432300 | 4.23880400  |
| H  | -0.32357200 | -4.23330400 | 3.75601200  |
| H  | 0.93672200  | -3.51033700 | 4.77205800  |
| H  | -0.75447900 | -3.02446400 | 4.98257400  |
| C  | -3.95606600 | -0.09500800 | 1.83726000  |
| H  | -3.08587400 | -0.74967300 | 1.94734100  |
| C  | -3.66530300 | 1.18456200  | 2.65345600  |
| H  | -2.78785100 | 1.70830000  | 2.26075900  |
| H  | -4.51420200 | 1.87883800  | 2.63562700  |
| H  | -3.47187400 | 0.92527700  | 3.70151700  |
| C  | -5.18627900 | -0.84512500 | 2.40203900  |
| H  | -6.09439000 | -0.23601600 | 2.31485900  |
| H  | -5.36091600 | -1.78582800 | 1.86690500  |
| H  | -5.03789300 | -1.07873500 | 3.46340300  |
| Ni | -0.20130300 | 0.38661800  | 0.01843600  |
| C  | 0.77155000  | 4.32808800  | 0.57150300  |
| C  | -0.09537500 | 3.27462900  | 0.21787000  |
| C  | -1.45425200 | 3.53078100  | -0.00150700 |
| C  | -1.90672700 | 4.84173300  | 0.14475000  |
| C  | -1.03130100 | 5.88463700  | 0.50180700  |
| C  | 0.32525000  | 5.64343600  | 0.72015400  |
| C  | 1.94799600  | 2.38010700  | 0.44364000  |
| H  | -2.12871100 | 2.72654100  | -0.28011500 |
| H  | -2.95741300 | 5.06440200  | -0.02275400 |
| H  | -1.41746400 | 6.89531700  | 0.60633500  |
| H  | 1.00147100  | 6.44901200  | 0.99358500  |
| H  | 3.58575800  | 1.55037900  | 0.01764500  |
| N  | 0.64878900  | 2.09130800  | 0.15347700  |
| N  | 2.01941200  | 3.73947100  | 0.70480000  |
| C  | 3.22014500  | 4.44998600  | 1.08758900  |
| H  | 3.48481800  | 5.21533900  | 0.34632300  |
| H  | 3.08973800  | 4.94252400  | 2.05933800  |
| H  | 4.03685100  | 3.73042600  | 1.16563200  |
| H  | -3.73415500 | -3.17757600 | -0.21442400 |
| H  | -1.43168400 | -4.48471700 | 0.58397700  |

|    |            |             |             |
|----|------------|-------------|-------------|
| O  | 4.27116200 | 0.80585100  | -0.10381600 |
| C  | 5.11774800 | 1.02821100  | -1.24345300 |
| C  | 5.94820200 | -0.24879900 | -1.40849600 |
| C  | 4.25959500 | 1.28447000  | -2.49340500 |
| C  | 6.03700700 | 2.22898900  | -0.96544100 |
| H  | 6.53781300 | -0.44006400 | -0.50490300 |
| H  | 5.29323500 | -1.11090600 | -1.57979400 |
| H  | 6.63456800 | -0.16459500 | -2.25868000 |
| H  | 3.62514200 | 2.16681600  | -2.35451800 |
| H  | 4.88757900 | 1.45035100  | -3.37703900 |
| H  | 3.60578000 | 0.42837400  | -2.69402100 |
| H  | 6.74143300 | 2.39044600  | -1.79033600 |
| H  | 5.44976100 | 3.14621300  | -0.84232900 |
| H  | 6.61058300 | 2.06224700  | -0.04719600 |
| Na | 2.34004000 | -0.18645400 | 0.53191700  |

## TS<sub>25-26</sub>

|   |             |             |             |
|---|-------------|-------------|-------------|
| C | 0.74788900  | -1.28939300 | -0.00307000 |
| C | 1.00221500  | -3.60331600 | 0.24189700  |
| C | 2.14929800  | -3.12965000 | -0.30724000 |
| N | 1.99790200  | -1.74019600 | -0.45955200 |
| N | 0.15091200  | -2.49759300 | 0.42321500  |
| C | 3.00717700  | -0.87802300 | -1.02215800 |
| C | 3.01384900  | -0.64823800 | -2.41713600 |
| C | 3.96576800  | -0.29189300 | -0.16505300 |
| C | 4.01070400  | 0.18967000  | -2.94172800 |
| C | 4.94390600  | 0.53607000  | -0.73858700 |
| C | 4.96828000  | 0.77658400  | -2.11294000 |
| H | 4.03399300  | 0.38642200  | -4.00883300 |
| H | 5.68816900  | 1.00093100  | -0.09977900 |
| H | 5.73136100  | 1.42210200  | -2.53749100 |
| C | -1.16670800 | -2.54411200 | 0.99187400  |
| C | -1.32619300 | -2.32292300 | 2.38257500  |
| C | -2.27801700 | -2.77524800 | 0.14107700  |
| C | -2.63302300 | -2.29971300 | 2.90332500  |
| C | -3.56357700 | -2.74790500 | 0.71078000  |
| C | -3.74337800 | -2.50165900 | 2.07657400  |
| H | -2.77993600 | -2.13517100 | 3.96588200  |
| H | -4.42910200 | -2.91963300 | 0.08082300  |
| H | -4.74401500 | -2.49072200 | 2.49844800  |
| C | 3.95925600  | -0.52349500 | 1.34506500  |
| H | 3.11808400  | -1.18389700 | 1.57736700  |
| C | 5.25288600  | -1.22804200 | 1.81698800  |
| H | 5.39849600  | -2.18319200 | 1.29873100  |
| H | 6.13735700  | -0.60697300 | 1.63017700  |
| H | 5.20644500  | -1.42739000 | 2.89454200  |
| C | 3.72741300  | 0.79638500  | 2.11607400  |
| H | 4.53373500  | 1.51643300  | 1.93035000  |
| H | 2.77997600  | 1.25719000  | 1.81771000  |
| H | 3.69235200  | 0.60350900  | 3.19556000  |
| C | -0.13211900 | -2.12465500 | 3.31495700  |
| H | 0.76743400  | -2.08736300 | 2.69436000  |
| C | -0.20771200 | -0.78597700 | 4.08323900  |
| H | 0.68129600  | -0.66473900 | 4.71338000  |
| H | -0.24292000 | 0.05631800  | 3.38369200  |
| H | -1.08663600 | -0.74251400 | 4.73931700  |
| C | 0.00994800  | -3.31968400 | 4.28837500  |
| H | -0.86219600 | -3.40237000 | 4.94862700  |
| H | 0.11180500  | -4.26623800 | 3.74532100  |
| H | 0.89763100  | -3.19064700 | 4.91868900  |
| C | -2.09449100 | -3.06590000 | -1.34788300 |
| H | -1.10016800 | -2.70338600 | -1.62673500 |
| C | -3.11727700 | -2.32953300 | -2.23978200 |
| H | -4.13508700 | -2.71521100 | -2.09796900 |
| H | -3.12177600 | -1.25373100 | -2.03656300 |
| H | -2.85886900 | -2.47968000 | -3.29465300 |
| C | -2.13746100 | -4.59205300 | -1.61200800 |
| H | -1.36877600 | -5.12126100 | -1.03823400 |
| H | -3.11412800 | -5.00861300 | -1.33550600 |
| H | -1.96962500 | -4.79765900 | -2.67584500 |
| C | 1.96453200  | -1.25674600 | -3.34685200 |
| H | 1.35346000  | -1.94597400 | -2.75539500 |
| C | 1.01546900  | -0.16686600 | -3.89911900 |
| H | 0.51058000  | 0.35221700  | -3.07711100 |
| H | 1.56699900  | 0.57238400  | -4.49368200 |
| H | 0.25204100  | -0.61871900 | -4.54510700 |
| C | 2.60654400  | -2.07217200 | -4.49249900 |
| H | 3.19830000  | -1.43413200 | -5.15981300 |

|    |             |             |             |
|----|-------------|-------------|-------------|
| H  | 3.26761200  | -2.85528200 | -4.10331100 |
| H  | 1.82789700  | -2.55174100 | -5.09784600 |
| Ni | 0.04389000  | 0.36698000  | 0.09053900  |
| C  | 0.35805200  | 3.93305200  | 0.47050300  |
| C  | -0.10743600 | 3.08596400  | 1.50285100  |
| C  | 0.16288300  | 3.39506500  | 2.83861200  |
| C  | 0.90080800  | 4.54760900  | 3.11497400  |
| C  | 1.36171900  | 5.38084200  | 2.07997300  |
| C  | 1.09772900  | 5.08798600  | 0.74071100  |
| C  | -0.80852300 | 2.19805900  | -0.43567500 |
| H  | -0.19257400 | 2.74952000  | 3.63782300  |
| H  | 1.12312100  | 4.80802400  | 4.14659500  |
| H  | 1.93553700  | 6.27040600  | 2.32709500  |
| H  | 1.46059500  | 5.73279700  | -0.05511100 |
| H  | -2.41693800 | 1.55293900  | -1.10679300 |
| N  | -0.83161100 | 2.03712400  | 0.92618400  |
| N  | -0.08416200 | 3.36039300  | -0.70930600 |
| C  | 0.22268600  | 3.85076400  | -2.03468100 |
| H  | -0.13489800 | 4.87997900  | -2.16996500 |
| H  | 1.30305700  | 3.82975000  | -2.22557700 |
| H  | -0.27416700 | 3.20046400  | -2.75701400 |
| H  | 3.05017000  | -3.64031600 | -0.60178900 |
| O  | 0.71674400  | -4.60322000 | 0.52059700  |
| H  | -3.34199200 | 1.12483000  | -1.02332200 |
| C  | -4.35780100 | 2.00345800  | -1.53616100 |
| C  | -5.68172600 | 1.24339800  | -1.40684000 |
| C  | -4.39494500 | 3.29948200  | -0.70868500 |
| C  | -4.05606600 | 2.31218800  | -3.01153300 |
| H  | -5.64111600 | 0.30495700  | -1.97022100 |
| H  | -5.88688000 | 1.00450400  | -0.35585200 |
| H  | -6.51698900 | 1.84160300  | -1.78833200 |
| H  | -3.43044700 | 3.81561000  | -0.75453600 |
| H  | -5.17005000 | 3.98273400  | -1.07630900 |
| H  | -4.60848900 | 3.07674700  | 0.34385500  |
| H  | -4.83330400 | 2.94863100  | -3.45131300 |
| H  | -3.09662600 | 2.83345500  | -3.10558100 |
| H  | -3.99738500 | 1.38402400  | -3.58968800 |
| Na | -2.48279900 | 0.31069700  | 0.91690500  |

## 26

|   |             |             |             |
|---|-------------|-------------|-------------|
| C | 1.56827700  | -0.68740600 | 0.19311300  |
| C | 2.82699800  | -2.46983700 | 1.03287300  |
| C | 3.70404400  | -1.56427700 | 0.52992600  |
| N | 2.94830800  | -0.49383500 | 0.02209300  |
| N | 1.53793600  | -1.94576900 | 0.82556600  |
| C | 3.52910700  | 0.68000200  | -0.58212200 |
| C | 3.69196000  | 0.72117100  | -1.98553500 |
| C | 3.93149000  | 1.75155600  | 0.24788200  |
| C | 4.26619700  | 1.87183600  | -2.54876000 |
| C | 4.50189100  | 2.87932900  | -0.36383600 |
| C | 4.66816400  | 2.94213500  | -1.74814300 |
| H | 4.39610300  | 1.93035200  | -3.62472100 |
| H | 4.81314800  | 3.71763600  | 0.25105200  |
| H | 5.10968800  | 3.82402500  | -2.20239200 |
| C | 0.31842400  | -2.59748300 | 1.21832700  |
| C | -0.28865400 | -2.24679200 | 2.45094700  |
| C | -0.24994200 | -3.56614700 | 0.35616300  |
| C | -1.50975500 | -2.86193600 | 2.78124200  |
| C | -1.47030700 | -4.15372100 | 0.73291900  |
| C | -2.10112200 | -3.80073200 | 1.92855600  |
| H | -1.99414900 | -2.61177900 | 3.71910100  |
| H | -1.93149500 | -4.88944600 | 0.08275700  |
| H | -3.04224500 | -4.26685000 | 2.20390400  |
| C | 3.73964200  | 1.72685000  | 1.76420300  |
| H | 3.35969100  | 0.73779800  | 2.03871800  |
| C | 5.07314500  | 1.93794500  | 2.51768000  |
| H | 5.82030100  | 1.19152100  | 2.22358200  |
| H | 5.49477100  | 2.93077400  | 2.32001300  |
| H | 4.91378700  | 1.85464500  | 3.59942500  |
| C | 2.67681400  | 2.76002900  | 2.20683600  |
| H | 2.98356800  | 3.78115700  | 1.94834100  |
| H | 1.71545300  | 2.55252000  | 1.72368000  |
| H | 2.53285100  | 2.71612100  | 3.29359700  |
| C | 0.36169900  | -1.26478600 | 3.42542600  |
| H | 1.19016900  | -0.78060500 | 2.90066600  |
| C | -0.60141100 | -0.14369100 | 3.87482700  |
| H | -0.07441200 | 0.55430800  | 4.53594900  |
| H | -0.97103200 | 0.42459200  | 3.01406600  |

|    |             |             |             |
|----|-------------|-------------|-------------|
| H  | -1.45936700 | -0.53856400 | 4.43340600  |
| C  | 0.94544700  | -2.02124300 | 4.64419900  |
| H  | 0.15480100  | -2.52385000 | 5.21494300  |
| H  | 1.67127700  | -2.78118000 | 4.33214900  |
| H  | 1.45357400  | -1.32028700 | 5.31692100  |
| C  | 0.40793500  | -3.95610400 | -0.96826400 |
| H  | 1.39796400  | -3.49155500 | -0.99724100 |
| C  | -0.38725900 | -3.40266100 | -2.17494200 |
| H  | -1.40655600 | -3.80950000 | -2.19478300 |
| H  | -0.43685200 | -2.30791000 | -2.12414300 |
| H  | 0.10540900  | -3.67789500 | -3.11523300 |
| C  | 0.60795200  | -5.48392400 | -1.08802100 |
| H  | 1.18637000  | -5.87665500 | -0.24416000 |
| H  | -0.34908500 | -6.01818400 | -1.11732500 |
| H  | 1.14782100  | -5.72148300 | -2.01209700 |
| C  | 3.24354800  | -0.42524700 | -2.89049700 |
| H  | 2.89244000  | -1.23892300 | -2.24805900 |
| C  | 2.05056800  | 0.00371600  | -3.77645300 |
| H  | 1.21326500  | 0.33721800  | -3.15285500 |
| H  | 2.33086600  | 0.82367600  | -4.44936700 |
| H  | 1.71204700  | -0.83813500 | -4.39362200 |
| C  | 4.40765200  | -0.97518300 | -3.74628200 |
| H  | 4.79092600  | -0.21777000 | -4.44059300 |
| H  | 5.24213400  | -1.30683500 | -3.11755200 |
| H  | 4.06834200  | -1.83057100 | -4.34310100 |
| Ni | 0.18977600  | 0.47945700  | -0.08395900 |
| C  | -2.39574500 | 3.69144800  | 0.01196300  |
| C  | -3.19326200 | 2.66317600  | 0.57312300  |
| C  | -4.47968600 | 2.96294500  | 1.04062900  |
| C  | -4.93808400 | 4.27634200  | 0.93186100  |
| C  | -4.13491700 | 5.28538500  | 0.36922400  |
| C  | -2.84853000 | 5.00789100  | -0.09895100 |
| C  | -1.26493600 | 1.71802900  | -0.00086800 |
| H  | -5.09848100 | 2.18783500  | 1.48753400  |
| H  | -5.93276300 | 4.52819900  | 1.29156500  |
| H  | -4.52065700 | 6.29934300  | 0.30017000  |
| H  | -2.22922000 | 5.79029300  | -0.52978500 |
| H  | -2.80205700 | -1.68227900 | -2.12602100 |
| N  | -2.48740200 | 1.47425500  | 0.54779000  |
| N  | -1.20951300 | 3.07559600  | -0.33637400 |
| C  | -0.08121600 | 3.74505100  | -0.94757800 |
| H  | -0.35909400 | 4.18138700  | -1.91605200 |
| H  | 0.29994000  | 4.54634900  | -0.30156100 |
| H  | 0.70767800  | 3.00502900  | -1.10085500 |
| H  | 4.77961600  | -1.57664900 | 0.48416400  |
| H  | 2.99137300  | -3.42038700 | 1.51109000  |
| O  | -3.42357300 | -1.63770700 | -1.37978100 |
| C  | -4.68818800 | -1.10932300 | -1.88221900 |
| C  | -5.56371200 | -0.92457200 | -0.64186100 |
| C  | -4.43040600 | 0.22895800  | -2.58407700 |
| C  | -5.29362600 | -2.14177600 | -2.84102000 |
| H  | -5.67688100 | -1.87379700 | -0.10529000 |
| H  | -5.12407100 | -0.18204500 | 0.03285500  |
| H  | -6.56001700 | -0.57205300 | -0.92801900 |
| H  | -3.77047800 | 0.09286900  | -3.45119100 |
| H  | -5.36816500 | 0.66351000  | -2.94830600 |
| H  | -3.95912800 | 0.93861300  | -1.89771700 |
| H  | -6.26232700 | -1.80005500 | -3.22261000 |
| H  | -4.63610300 | -2.30564800 | -3.70425800 |
| H  | -5.43912400 | -3.10082100 | -2.33263100 |
| Na | -2.19302100 | -0.77133200 | 0.38932200  |

## TS<sub>26-27</sub>

|   |             |             |             |
|---|-------------|-------------|-------------|
| C | 0.44923200  | 2.56856400  | 0.39617700  |
| C | -1.00826800 | 4.21661300  | 1.19172900  |
| C | -1.61416200 | 3.02638200  | 1.39829300  |
| N | -0.75526700 | 2.02931200  | 0.90222800  |
| N | 0.23633900  | 3.95376500  | 0.58064000  |
| C | -1.19984900 | 0.66822100  | 0.71556600  |
| C | -2.11042000 | 0.39987600  | -0.33563200 |
| C | -0.75886000 | -0.34554000 | 1.59943200  |
| C | -2.55410500 | -0.92293400 | -0.50227800 |
| C | -1.22471300 | -1.65195600 | 1.38143700  |
| C | -2.10950000 | -1.94123400 | 0.33956400  |
| H | -3.25321600 | -1.15346400 | -1.29997700 |

|    |             |             |             |
|----|-------------|-------------|-------------|
| H  | -0.89920500 | -2.45163700 | 2.03583800  |
| H  | -2.45809400 | -2.95904400 | 0.19267000  |
| C  | 1.09775800  | 5.02511700  | 0.14296200  |
| C  | 1.85078700  | 5.74770200  | 1.10277300  |
| C  | 1.08669100  | 5.39750200  | -1.22786400 |
| C  | 2.61443300  | 6.84261500  | 0.65735500  |
| C  | 1.87737600  | 6.48940600  | -1.62057300 |
| C  | 2.63229800  | 7.20968800  | -0.69010600 |
| H  | 3.18378800  | 7.42174900  | 1.37601700  |
| H  | 1.88482700  | 6.79350800  | -2.66023500 |
| H  | 3.20573500  | 8.07547900  | -1.01049100 |
| C  | 0.13575800  | -0.01596400 | 2.79555800  |
| H  | 0.80185700  | 0.79928200  | 2.49000700  |
| C  | -0.72036900 | 0.47929100  | 3.98947100  |
| H  | -0.07439100 | 0.74363400  | 4.83567000  |
| H  | -1.30867800 | 1.36375500  | 3.72409200  |
| H  | -1.41249000 | -0.30487100 | 4.32168300  |
| C  | 1.02914700  | -1.19111400 | 3.23606800  |
| H  | 0.44419700  | -2.02784500 | 3.63756400  |
| H  | 1.64257000  | -1.55841900 | 2.40696500  |
| H  | 1.70503200  | -0.86043900 | 4.03200300  |
| C  | 1.81243300  | 5.41542600  | 2.59608200  |
| H  | 1.47594900  | 4.37721900  | 2.69381900  |
| C  | 3.19697400  | 5.53235200  | 3.27143100  |
| H  | 3.15376700  | 5.10859700  | 4.28103300  |
| H  | 3.96680000  | 4.99602800  | 2.71240400  |
| H  | 3.50985800  | 6.57879900  | 3.37256700  |
| C  | 0.80779500  | 6.32494100  | 3.35030800  |
| H  | 0.78776800  | 6.06196500  | 4.41464000  |
| H  | 1.10546400  | 7.37753000  | 3.26657700  |
| H  | -0.20959500 | 6.23005800  | 2.96189400  |
| C  | 0.17124800  | 4.70667600  | -2.24088300 |
| H  | 0.07657600  | 3.65888500  | -1.93839500 |
| C  | 0.71954700  | 4.71964800  | -3.68102300 |
| H  | 0.70687500  | 5.72719400  | -4.11630000 |
| H  | 1.73745700  | 4.32556300  | -3.72839600 |
| H  | 0.09257900  | 4.08534300  | -4.31703000 |
| C  | -1.24048400 | 5.35024300  | -2.21215500 |
| H  | -1.69896500 | 5.28814900  | -1.22033900 |
| H  | -1.18700000 | 6.40788400  | -2.49971200 |
| H  | -1.89973800 | 4.83941400  | -2.92438700 |
| C  | -2.65599600 | 1.49468400  | -1.25750100 |
| H  | -2.14847700 | 2.43106600  | -1.01122500 |
| C  | -2.37706500 | 1.21466800  | -2.75121000 |
| H  | -1.30199300 | 1.17663100  | -2.94853100 |
| H  | -2.82417700 | 0.26824600  | -3.07836500 |
| H  | -2.80664600 | 2.01378300  | -3.36760400 |
| C  | -4.17035800 | 1.70996100  | -1.01687800 |
| H  | -4.74385300 | 0.81041400  | -1.27101100 |
| H  | -4.37796200 | 1.95289400  | 0.03144500  |
| H  | -4.54197900 | 2.53335600  | -1.63845300 |
| Ni | 1.91857700  | 1.56648900  | -0.09242400 |
| C  | 2.92996800  | 1.81734500  | -3.91845300 |
| C  | 1.96076900  | 0.80810600  | -4.15889300 |
| C  | 1.58706800  | 0.42511900  | -5.44426700 |
| C  | 2.20400000  | 1.07981200  | -6.51854300 |
| C  | 3.16199700  | 2.08111700  | -6.29972000 |
| C  | 3.53444200  | 2.46034400  | -5.00647600 |
| C  | 2.26867600  | 1.10701000  | -1.93631000 |
| H  | 0.85113900  | -0.35599200 | -5.61627300 |
| H  | 1.93900100  | 0.80183100  | -7.53512300 |
| H  | 3.62714400  | 2.56825800  | -7.15318800 |
| H  | 4.28263800  | 3.23247400  | -4.84164300 |
| N  | 1.54446900  | 0.39048600  | -2.90147100 |
| N  | 3.11355100  | 1.97664300  | -2.56166600 |
| C  | 0.72382100  | -0.77234400 | -2.64515800 |
| H  | 0.28769500  | -0.69363200 | -1.64809100 |
| H  | -0.09148900 | -0.82305700 | -3.37301600 |
| H  | 1.30632100  | -1.70267100 | -2.71296500 |
| H  | -2.57284200 | 2.78974700  | 1.82628300  |
| H  | -1.33939100 | 5.21805500  | 1.39986900  |
| C  | 3.61588600  | 0.73292900  | 0.49936900  |
| C  | 3.11698100  | 0.03772200  | -0.72766400 |
| C  | 4.78901200  | 0.40051400  | 1.08577600  |
| C  | 5.28139900  | 1.05031100  | 2.39677100  |
| C  | 4.76990100  | 2.47993900  | 2.57606200  |
| H  | 3.68686200  | 2.51607900  | 2.44171600  |
| H  | 5.02807500  | 2.86499500  | 3.56829800  |
| H  | 5.23879200  | 3.13705900  | 1.83264300  |
| C  | 4.80266100  | 0.17887500  | 3.57535500  |

|    |             |             |             |
|----|-------------|-------------|-------------|
| H  | 5.14857500  | 0.57346100  | 4.53934400  |
| H  | 3.70962500  | 0.15987600  | 3.58961100  |
| H  | 5.16052900  | -0.85090400 | 3.47524000  |
| C  | 5.65120400  | -0.76318900 | 0.58828900  |
| H  | 6.24005500  | -1.18188300 | 1.41310900  |
| H  | 4.99986300  | -1.57163300 | 0.22779700  |
| C  | 6.62736000  | -0.37724600 | -0.54177000 |
| H  | 7.26268300  | 0.44399200  | -0.18729500 |
| H  | 6.05995300  | 0.01660800  | -1.39788700 |
| C  | 7.50373400  | -1.54274800 | -1.01948400 |
| H  | 8.08805400  | -1.92715000 | -0.17101200 |
| H  | 6.85871700  | -2.37201300 | -1.34465100 |
| C  | 8.45228800  | -1.15870900 | -2.16056400 |
| H  | 9.13541500  | -0.35642100 | -1.85381300 |
| H  | 9.06350500  | -2.01050900 | -2.48198400 |
| H  | 7.89370500  | -0.80111000 | -3.03489700 |
| H  | 3.86635600  | -0.24356500 | -1.47173800 |
| H  | 2.46512700  | -0.82251600 | -0.52989500 |
| Na | 4.23859900  | 2.93366200  | -0.75646100 |
| H  | 4.62757200  | 5.70830400  | -0.69344600 |
| O  | 5.24491100  | 4.96963800  | -0.84472500 |
| C  | 6.39379300  | 5.45507400  | -1.59364300 |
| C  | 7.22428200  | 4.21044000  | -1.91077900 |
| C  | 5.90561600  | 6.13332400  | -2.87968400 |
| C  | 7.17843200  | 6.43238200  | -0.70910000 |
| H  | 7.52595300  | 3.69986400  | -0.98982000 |
| H  | 6.65502100  | 3.50948900  | -2.53258200 |
| H  | 8.13169200  | 4.48510500  | -2.45882500 |
| H  | 5.28697000  | 7.00979100  | -2.65097100 |
| H  | 6.75214800  | 6.47321800  | -3.48667100 |
| H  | 5.30680600  | 5.43874500  | -3.47802200 |
| H  | 8.06975000  | 6.80169300  | -1.22866300 |
| H  | 6.56237000  | 7.30093300  | -0.44465700 |
| H  | 7.49497800  | 5.94098900  | 0.21649300  |
| O  | 6.73299700  | 1.09546800  | 2.34816300  |
| Si | 7.89708100  | 1.20380900  | 3.59875100  |
| C  | 7.47347600  | 2.52049700  | 4.92192200  |
| H  | 7.35101300  | 3.51751200  | 4.48519800  |
| H  | 6.55217400  | 2.27695400  | 5.46172100  |
| H  | 8.28048100  | 2.57544700  | 5.66243500  |
| C  | 8.14216000  | -0.47345400 | 4.48203900  |
| H  | 9.03489200  | -0.44455800 | 5.11878900  |
| H  | 7.28879200  | -0.72536200 | 5.12015000  |
| H  | 8.27214700  | -1.28829800 | 3.76164800  |
| C  | 9.53141300  | 1.70593200  | 2.67828700  |
| C  | 9.27933800  | 2.96628000  | 1.82768900  |
| H  | 8.48926600  | 2.79090600  | 1.08950700  |
| H  | 8.97791900  | 3.82183800  | 2.44589100  |
| H  | 10.19395700 | 3.25559800  | 1.28918100  |
| C  | 10.64343000 | 2.00227000  | 3.70577400  |
| H  | 10.85585800 | 1.13697100  | 4.34664300  |
| H  | 11.57900800 | 2.25834800  | 3.18766200  |
| H  | 10.39045100 | 2.84802400  | 4.35675900  |
| C  | 9.99295600  | 0.55817600  | 1.75832000  |
| H  | 10.22068900 | -0.35247400 | 2.32569200  |
| H  | 9.23185000  | 0.30696900  | 1.01213400  |
| H  | 10.90821800 | 0.84552100  | 1.21981600  |

27

|   |             |             |             |
|---|-------------|-------------|-------------|
| C | -2.36817100 | -1.44051700 | -0.59862200 |
| C | -4.50467400 | -2.15646200 | -1.23534100 |
| C | -4.04478500 | -3.04960100 | -0.32545200 |
| N | -2.75994600 | -2.62301000 | 0.06302400  |
| N | -3.50296500 | -1.18574300 | -1.39941600 |
| C | -1.99452300 | -3.31003100 | 1.07346100  |
| C | -1.02254200 | -4.26209700 | 0.68284200  |
| C | -2.28473400 | -3.05737700 | 2.43494100  |
| C | -0.33875400 | -4.95584900 | 1.69358300  |
| C | -1.57911800 | -3.78460400 | 3.40821200  |
| C | -0.61345300 | -4.72343300 | 3.04311900  |
| H | 0.41358600  | -5.68825900 | 1.42404900  |
| H | -1.79388400 | -3.61907900 | 4.45918500  |
| H | -0.07888500 | -5.27901500 | 3.80800000  |
| C | -3.65891800 | -0.03717400 | -2.25551300 |
| C | -4.34258100 | 1.09709100  | -1.75757800 |
| C | -3.17764600 | -0.09007500 | -3.58393800 |
| C | -4.53635600 | 2.18594000  | -2.62340100 |
| C | -3.39088700 | 1.02606400  | -4.40898400 |

|    |             |             |             |
|----|-------------|-------------|-------------|
| C  | -4.06485000 | 2.15422200  | -3.93783100 |
| H  | -5.07062100 | 3.06100500  | -2.26539800 |
| H  | -3.02811600 | 1.00718200  | -5.43173000 |
| H  | -4.22985500 | 3.00259500  | -4.59567900 |
| C  | -3.36239400 | -2.05776500 | 2.85777500  |
| H  | -3.59936800 | -1.44110900 | 1.98489200  |
| C  | -4.65763700 | -2.78710200 | 3.29218500  |
| H  | -5.05080500 | -3.41723200 | 2.48751100  |
| H  | -4.47088800 | -3.42840900 | 4.16257700  |
| H  | -5.43336800 | -2.06121800 | 3.56525400  |
| C  | -2.88796300 | -1.10387500 | 3.97567400  |
| H  | -2.71977700 | -1.63794000 | 4.91950900  |
| H  | -1.95716600 | -0.59671400 | 3.70243700  |
| H  | -3.65318300 | -0.34082000 | 4.16431600  |
| C  | -4.88055300 | 1.15898500  | -0.32802400 |
| H  | -4.54926500 | 0.25439500  | 0.19057400  |
| C  | -4.30790900 | 2.36282400  | 0.45325200  |
| H  | -4.68899900 | 2.36167600  | 1.48193400  |
| H  | -3.21497600 | 2.31240300  | 0.49379000  |
| H  | -4.59502900 | 3.31750900  | -0.00463800 |
| C  | -6.42788400 | 1.17381300  | -0.30988900 |
| H  | -6.82252400 | 2.06433300  | -0.81454700 |
| H  | -6.83980200 | 0.29238900  | -0.81457200 |
| H  | -6.79777300 | 1.18019800  | 0.72263500  |
| C  | -2.45289600 | -1.31580500 | -4.13750200 |
| H  | -2.35270300 | -2.03768300 | -3.32150900 |
| C  | -1.02430700 | -0.96429700 | -4.61090000 |
| H  | -1.03929800 | -0.23977700 | -5.43474100 |
| H  | -0.44200700 | -0.54105600 | -3.78542000 |
| H  | -0.51152400 | -1.86600600 | -4.96781800 |
| C  | -3.26739600 | -1.98890900 | -5.26746100 |
| H  | -4.26499200 | -2.28108200 | -4.91933200 |
| H  | -3.39393500 | -1.31541100 | -6.12408000 |
| H  | -2.75206700 | -2.88963600 | -5.62225800 |
| C  | -0.75624900 | -4.56390400 | -0.79262200 |
| H  | -0.97280500 | -3.64679700 | -1.35207500 |
| C  | 0.71015900  | -4.94342700 | -1.08362400 |
| H  | 1.40170000  | -4.19816100 | -0.67921600 |
| H  | 0.97154100  | -5.92261900 | -0.66344700 |
| H  | 0.86828900  | -5.00181800 | -2.16670500 |
| C  | -1.70252200 | -5.67830400 | -1.30787500 |
| H  | -1.53380000 | -6.61306300 | -0.75817200 |
| H  | -2.75456100 | -5.39915700 | -1.19261000 |
| H  | -1.51843100 | -5.87154700 | -2.37186300 |
| Ni | -0.84536200 | -0.43712700 | -0.62521200 |
| C  | -1.07638300 | 5.01043400  | 0.89745900  |
| C  | -0.51559400 | 4.11835900  | 1.84070700  |
| C  | -0.47765300 | 4.47437500  | 3.19378500  |
| C  | -1.01623200 | 5.70165900  | 3.57310400  |
| C  | -1.58227500 | 6.57162000  | 2.62257000  |
| C  | -1.62008100 | 6.24157700  | 1.26826700  |
| C  | -0.31951900 | 3.15698900  | -0.09106600 |
| H  | -0.01446600 | 3.81747400  | 3.92655200  |
| H  | -0.99505400 | 5.99760300  | 4.61825700  |
| H  | -1.99602400 | 7.52148600  | 2.94919500  |
| H  | -2.05725200 | 6.92080200  | 0.54202500  |
| N  | -0.06451300 | 2.97497800  | 1.19726900  |
| N  | -0.92985700 | 4.37554300  | -0.32690200 |
| C  | -1.38440100 | 4.86819800  | -1.61623200 |
| H  | -0.60381900 | 4.72890300  | -2.36892300 |
| H  | -2.28753900 | 4.34260400  | -1.94554400 |
| H  | -1.59900100 | 5.93546800  | -1.53314800 |
| H  | -4.49907900 | -3.93695500 | 0.08025000  |
| H  | -5.43416700 | -2.11678700 | -1.77707900 |
| C  | 0.60235000  | 0.84816800  | -0.85066400 |
| C  | -0.02522100 | 2.21180900  | -1.22219600 |
| C  | 1.96695500  | 0.77404100  | -0.91006400 |
| C  | 2.69520400  | -0.59446600 | -0.74360400 |
| C  | 2.39932700  | -1.47499200 | -1.97220300 |
| H  | 2.72082700  | -0.97633600 | -2.89222500 |
| H  | 2.90596300  | -2.44727500 | -1.90576700 |
| H  | 1.32005700  | -1.64568600 | -2.03374900 |
| C  | 2.26236600  | -1.32909400 | 0.53541900  |
| H  | 2.54711700  | -0.73339900 | 1.41404200  |
| H  | 1.17652600  | -1.49684300 | 0.52657000  |
| H  | 2.76080200  | -2.30087000 | 0.62225200  |
| C  | 2.87654800  | 1.95658600  | -1.23873100 |
| H  | 2.38714100  | 2.89215000  | -0.94278800 |
| H  | 3.78609500  | 1.88740000  | -0.63465900 |
| C  | 3.29389900  | 2.07179200  | -2.72081400 |

|    |             |             |             |
|----|-------------|-------------|-------------|
| H  | 2.39477200  | 2.09124400  | -3.35468500 |
| H  | 3.85101700  | 1.17145900  | -3.01001700 |
| C  | 4.15010700  | 3.31106300  | -3.01473900 |
| H  | 3.59636800  | 4.21430700  | -2.71805400 |
| H  | 5.04939800  | 3.28767700  | -2.38267500 |
| C  | 4.56502400  | 3.42886400  | -4.48562100 |
| H  | 3.68738100  | 3.49071300  | -5.14163100 |
| H  | 5.17689300  | 4.32161400  | -4.66282200 |
| H  | 5.15005700  | 2.55630300  | -4.80247700 |
| H  | -0.98446700 | 2.02028600  | -1.72544200 |
| H  | 0.57215000  | 2.77405900  | -1.95951500 |
| Na | 0.24988100  | 0.64645800  | 1.63495700  |
| H  | 0.01588600  | 1.63126100  | 4.17772200  |
| O  | 0.38489400  | 0.76259300  | 3.94665200  |
| C  | 1.20423300  | 0.30431600  | 5.06146400  |
| C  | 2.40169600  | 1.25030500  | 5.21550200  |
| C  | 0.34098700  | 0.28526200  | 6.32869900  |
| C  | 1.65398800  | -1.10579900 | 4.67907700  |
| H  | 2.98407200  | 1.28859200  | 4.28900500  |
| H  | 2.07036300  | 2.26917600  | 5.45385000  |
| H  | 3.06150300  | 0.91828900  | 6.02497300  |
| H  | -0.53046600 | -0.36191900 | 6.18939800  |
| H  | 0.91511700  | -0.08321300 | 7.18593700  |
| H  | -0.01380300 | 1.29398000  | 6.57776500  |
| H  | 2.26415100  | -1.53870100 | 5.47886100  |
| H  | 0.79021200  | -1.75647700 | 4.50875900  |
| H  | 2.25625500  | -1.08804600 | 3.76476400  |
| O  | 4.11596500  | -0.34031700 | -0.63050000 |
| Si | 5.48443400  | -1.33463800 | -0.86858400 |
| H  | 5.32446300  | -3.07325000 | -0.08525200 |
| C  | 4.50653300  | -3.64912600 | -0.53151200 |
| H  | 6.24927700  | -3.64041800 | -0.24717300 |
| H  | 5.14807400  | -3.02319100 | 0.99457800  |
| C  | 5.87526300  | -1.55522000 | -2.72522600 |
| H  | 5.12407900  | -2.17857800 | -3.22144800 |
| H  | 5.90346300  | -0.59148200 | -3.24497100 |
| H  | 6.85035600  | -2.03887300 | -2.86104800 |
| C  | 6.90860800  | -0.35060300 | 0.00980000  |
| C  | 8.22011900  | -1.16130700 | -0.03599800 |
| H  | 9.03160000  | -0.59645300 | 0.44550700  |
| H  | 8.13338900  | -2.11878100 | 0.49239100  |
| H  | 8.53943700  | -1.37328200 | -1.06426300 |
| C  | 6.52285900  | -0.09014300 | 1.47958100  |
| H  | 5.58975200  | 0.47953000  | 1.54797500  |
| H  | 6.38967000  | -1.02486000 | 2.03943200  |
| H  | 7.31168200  | 0.48544500  | 1.98628900  |
| C  | 7.12998600  | 1.00190600  | -0.69699800 |
| H  | 7.43825400  | 0.87212800  | -1.74183600 |
| H  | 6.22209100  | 1.61483400  | -0.68808900 |
| H  | 7.92360900  | 1.57090100  | -0.19020200 |

## TS<sub>27</sub>-TP1

|   |             |             |             |
|---|-------------|-------------|-------------|
| C | -1.97395800 | -0.13320000 | 0.62934500  |
| C | -3.49810300 | -0.48715700 | 2.37138000  |
| C | -4.04146600 | -1.03596600 | 1.25880500  |
| N | -3.13451400 | -0.82369800 | 0.20511100  |
| N | -2.25665900 | 0.05784000  | 2.00231100  |
| C | -3.41766400 | -1.26127600 | -1.14083500 |
| C | -4.15387500 | -0.41167500 | -2.00154000 |
| C | -3.02489900 | -2.55969800 | -1.53928500 |
| C | -4.47878000 | -0.89130900 | -3.28033900 |
| C | -3.37376900 | -2.99285000 | -2.82775100 |
| C | -4.09252600 | -2.16736000 | -3.69266200 |
| H | -5.04111500 | -0.26081900 | -3.96017100 |
| H | -3.08242900 | -3.98504900 | -3.15596100 |
| H | -4.35382100 | -2.51894500 | -4.68603400 |
| C | -1.42877000 | 0.79303800  | 2.92687700  |
| C | -0.51004000 | 0.09122200  | 3.74330800  |
| C | -1.60927000 | 2.19183000  | 3.03956200  |
| C | 0.26892400  | 0.83357000  | 4.64517600  |
| C | -0.80712300 | 2.88795100  | 3.95807700  |
| C | 0.13084700  | 2.21898600  | 4.74557900  |
| H | 0.98556800  | 0.32324200  | 5.27902900  |
| H | -0.92335300 | 3.96132200  | 4.06274100  |
| H | 0.74371400  | 2.77449600  | 5.44906700  |
| C | -2.28019700 | -3.50087100 | -0.59375200 |
| H | -1.91318700 | -2.89466500 | 0.23423000  |
| C | -3.23068700 | -4.57138800 | -0.00502500 |

|    |             |             |             |
|----|-------------|-------------|-------------|
| H  | -4.06069200 | -4.10885900 | 0.53992100  |
| H  | -3.65388500 | -5.19544100 | -0.80138600 |
| H  | -2.69084100 | -5.22720400 | 0.68954700  |
| C  | -1.06154400 | -4.16968400 | -1.27113300 |
| H  | -1.37227600 | -4.90539800 | -2.02224000 |
| H  | -0.42967900 | -3.43237700 | -1.78105000 |
| H  | -0.46292600 | -4.71462000 | -0.52703400 |
| C  | -0.41686400 | -1.43524900 | 3.71698800  |
| H  | -0.81918900 | -1.76958800 | 2.75264900  |
| C  | 1.02767500  | -1.96680400 | 3.83502400  |
| H  | 1.02922200  | -3.05939200 | 3.72679100  |
| H  | 1.67973700  | -1.54682900 | 3.06340600  |
| H  | 1.46232400  | -1.74343400 | 4.81658600  |
| C  | -1.29897100 | -2.05270300 | 4.83258300  |
| H  | -0.94452100 | -1.73676900 | 5.82141700  |
| H  | -2.34595500 | -1.74820000 | 4.73574900  |
| H  | -1.25829400 | -3.14818100 | 4.79079300  |
| C  | -2.69774300 | 2.92647700  | 2.25624600  |
| H  | -3.01053500 | 2.27522700  | 1.43415000  |
| C  | -2.20919000 | 4.24745500  | 1.62820700  |
| H  | -1.93701700 | 4.98852500  | 2.38955500  |
| H  | -1.33821900 | 4.07713300  | 0.98966000  |
| H  | -3.00570100 | 4.68589000  | 1.01496000  |
| C  | -3.93356700 | 3.17919000  | 3.15621400  |
| H  | -4.33410400 | 2.24201000  | 3.55806500  |
| H  | -3.67375400 | 3.82627000  | 4.00322600  |
| H  | -4.72900500 | 3.67171100  | 2.58360200  |
| C  | -4.63587400 | 0.96791800  | -1.55057000 |
| H  | -3.99976300 | 1.27972600  | -0.71503600 |
| C  | -4.50849800 | 2.04362400  | -2.65024300 |
| H  | -3.49460900 | 2.07640300  | -3.05865600 |
| H  | -5.20688900 | 1.86740500  | -3.47726300 |
| H  | -4.74155100 | 3.03035200  | -2.23293600 |
| C  | -6.09752200 | 0.90308900  | -1.03979500 |
| H  | -6.77314300 | 0.57840100  | -1.84089500 |
| H  | -6.20135400 | 0.20374400  | -0.20395900 |
| H  | -6.42665400 | 1.89181300  | -0.69734900 |
| Ni | -0.52562000 | 0.39334600  | -0.32136800 |
| C  | 5.13589400  | -1.45539400 | 0.17504400  |
| C  | 4.09927900  | -2.20438700 | 0.77473900  |
| C  | 4.34744000  | -3.50740800 | 1.22229600  |
| C  | 5.63035200  | -4.02386200 | 1.05675100  |
| C  | 6.65393000  | -3.26379000 | 0.45844200  |
| C  | 6.42542200  | -1.96425700 | 0.00854600  |
| C  | 3.24814300  | -0.27490100 | 0.26997000  |
| H  | 3.56071200  | -4.09024900 | 1.69389500  |
| H  | 5.84953300  | -5.03176000 | 1.39794500  |
| H  | 7.64377700  | -3.69736600 | 0.34750500  |
| H  | 7.22091900  | -1.38110000 | -0.44604600 |
| N  | 2.94039000  | -1.44236100 | 0.81888800  |
| N  | 4.56164400  | -0.23286700 | -0.14802300 |
| C  | 5.26034600  | 0.87949700  | -0.77026500 |
| H  | 5.76753100  | 1.50284800  | -0.02401400 |
| H  | 6.00432300  | 0.48644000  | -1.46798200 |
| H  | 4.55624000  | 1.49034000  | -1.33565100 |
| H  | -4.97377800 | -1.55326600 | 1.11233800  |
| H  | -3.87130600 | -0.42560600 | 3.37869700  |
| C  | 1.32069000  | 0.95697200  | -1.00280700 |
| C  | 2.32087600  | 0.90582600  | 0.18823400  |
| C  | 1.16659800  | 2.15709800  | -1.64840400 |
| C  | 0.23167500  | 2.37230400  | -2.86629500 |
| C  | -0.79213000 | 3.48578500  | -2.55570000 |
| H  | -0.29943300 | 4.43938900  | -2.34702000 |
| H  | -1.46019200 | 3.63617900  | -3.40996400 |
| H  | -1.40195800 | 3.20892500  | -1.68885000 |
| C  | -0.52295700 | 1.12167300  | -3.31620400 |
| H  | 0.15561000  | 0.31257700  | -3.57974400 |
| H  | -1.17514700 | 0.74784700  | -2.51471900 |
| H  | -1.15462200 | 1.35896700  | -4.18160200 |
| C  | 1.95590500  | 3.42076900  | -1.29182300 |
| H  | 3.01870700  | 3.16560700  | -1.17566700 |
| H  | 1.92467100  | 4.11142100  | -2.13897000 |
| C  | 1.50212400  | 4.16834200  | -0.02105600 |
| H  | 1.44116500  | 3.47488400  | 0.82716100  |
| H  | 0.48344300  | 4.54712800  | -0.17018300 |
| C  | 2.42567000  | 5.34034700  | 0.33942700  |
| H  | 3.44597300  | 4.96201100  | 0.50068900  |
| H  | 2.49023800  | 6.02871000  | -0.51545600 |
| C  | 1.96658400  | 6.10980300  | 1.58284000  |
| H  | 1.91515000  | 5.45047900  | 2.45827500  |

|    |             |             |             |
|----|-------------|-------------|-------------|
| H  | 2.65109400  | 6.93198400  | 1.82265200  |
| H  | 0.96805500  | 6.53965800  | 1.43525900  |
| H  | 1.73089200  | 0.87408600  | 1.11333600  |
| H  | 2.94028100  | 1.80580600  | 0.26145400  |
| Na | 0.80682500  | -1.94621100 | -0.10208700 |
| H  | 1.26627600  | -0.25645100 | -1.72746500 |
| O  | 1.37430800  | -1.44356700 | -2.14390300 |
| C  | 2.15646500  | -1.85777700 | -3.25027800 |
| C  | 1.23668000  | -2.21286800 | -4.43858000 |
| C  | 3.14529700  | -0.75268000 | -3.67100300 |
| C  | 2.94960000  | -3.12002200 | -2.85127900 |
| H  | 0.51604900  | -2.98213400 | -4.13802000 |
| H  | 0.67066400  | -1.33878900 | -4.77441800 |
| H  | 1.80979900  | -2.59550900 | -5.29343600 |
| H  | 3.84738400  | -0.54381600 | -2.85637600 |
| H  | 3.72867200  | -1.05469300 | -4.55034600 |
| H  | 2.61912400  | 0.17733000  | -3.90903300 |
| H  | 3.56125300  | -3.49782200 | -3.68113900 |
| H  | 3.61281000  | -2.90727800 | -2.00605200 |
| H  | 2.26012900  | -3.92045700 | -2.55220500 |
| O  | 1.11851000  | 2.83456900  | -3.91900200 |
| Si | 0.91324400  | 3.07428700  | -5.60209100 |
| C  | -0.73400000 | 3.92901300  | -6.06550800 |
| H  | -0.86776600 | 4.88185200  | -5.54328000 |
| H  | -0.75254700 | 4.13205300  | -7.14342300 |
| H  | -1.59892000 | 3.29563500  | -5.83994700 |
| C  | 1.01161000  | 1.42707600  | -6.55961600 |
| H  | 0.98914200  | 1.60828500  | -7.64115000 |
| H  | 1.93189600  | 0.88126700  | -6.32774800 |
| H  | 0.16917500  | 0.77140200  | -6.31623700 |
| C  | 2.41211000  | 4.21602700  | -6.06667200 |
| C  | 2.28564300  | 5.56924600  | -5.33840100 |
| H  | 1.37862500  | 6.11139000  | -5.63401700 |
| H  | 2.26154000  | 5.43975000  | -4.25067000 |
| H  | 3.14423200  | 6.21321800  | -5.57965400 |
| C  | 2.43797100  | 4.46364800  | -7.58863800 |
| H  | 3.28413000  | 5.11459900  | -7.85250300 |
| H  | 2.55509800  | 3.53214900  | -8.15563200 |
| H  | 1.52514400  | 4.95984900  | -7.94187600 |
| C  | 3.72951100  | 3.53842700  | -5.63904800 |
| H  | 3.88992600  | 2.58798600  | -6.16309200 |
| H  | 4.58569700  | 4.18915200  | -5.87135100 |
| H  | 3.74064000  | 3.33384600  | -4.56319400 |

## TP1

|   |             |             |             |
|---|-------------|-------------|-------------|
| C | 2.20427100  | 0.38267900  | 0.77386100  |
| C | 3.16414700  | -1.17692900 | -0.35471200 |
| C | 4.20488800  | -0.43907300 | 0.25359900  |
| C | 3.47157000  | -2.27360500 | -1.16798600 |
| C | 5.55337000  | -0.75531400 | 0.07680300  |
| C | 4.81365400  | -2.59839000 | -1.34975800 |
| H | 2.67814900  | -2.84621400 | -1.63874700 |
| C | 5.83868400  | -1.85106100 | -0.73697100 |
| H | 6.34771600  | -0.18086600 | 0.54508900  |
| H | 5.07952500  | -3.44482900 | -1.97694600 |
| H | 6.87477500  | -2.13347200 | -0.90236500 |
| C | 4.23970700  | 1.57469700  | 1.76149700  |
| H | 4.92939200  | 1.10979100  | 2.47472200  |
| H | 4.80890600  | 2.25486400  | 1.11635200  |
| H | 3.50624700  | 2.15629600  | 2.32103200  |
| N | 1.93352600  | -0.63739800 | -0.00809800 |
| C | 1.18597300  | 1.29106800  | 1.41225700  |
| C | -0.23873900 | 0.87371800  | 1.14413400  |
| H | 1.37260400  | 2.32152400  | 1.08684100  |
| H | 1.36015000  | 1.28785900  | 2.50224800  |
| C | -1.25909200 | 1.68248200  | 0.82764800  |
| H | -0.43480600 | -0.18495700 | 1.25917600  |
| N | 3.56649800  | 0.55626400  | 0.97870300  |
| C | -2.68858700 | 1.10771500  | 0.70871700  |
| C | -3.46069200 | 1.45067700  | 2.00184900  |
| C | -3.44835600 | 1.68368600  | -0.50290100 |
| H | -3.48825500 | 2.52983800  | 2.18909700  |
| H | -4.49072700 | 1.08508500  | 1.92717400  |
| H | -2.97910200 | 0.96058100  | 2.85286200  |
| H | -4.45603700 | 1.25755100  | -0.53519700 |
| H | -3.54991600 | 2.77137200  | -0.43949400 |
| H | -2.94175200 | 1.44929600  | -1.44464400 |
| C | -1.08764400 | 3.18711300  | 0.66171500  |

|    |             |             |             |
|----|-------------|-------------|-------------|
| C  | -0.59339600 | 3.61941400  | -0.73535700 |
| H  | -0.38159000 | 3.56600200  | 1.41231600  |
| H  | -2.03277600 | 3.70180000  | 0.87451700  |
| C  | -0.40758000 | 5.13731100  | -0.86302200 |
| H  | 0.35550500  | 3.11164300  | -0.95606800 |
| H  | -1.30039800 | 3.27414900  | -1.50060100 |
| C  | 0.09268800  | 5.56809100  | -2.24603400 |
| H  | -1.36117800 | 5.63941300  | -0.64533300 |
| H  | 0.29837500  | 5.48313800  | -0.09380000 |
| H  | 0.21784800  | 6.65536200  | -2.30592800 |
| H  | 1.06062400  | 5.10716000  | -2.47857200 |
| H  | -0.61144200 | 5.26976300  | -3.03242800 |
| O  | -2.67176300 | -0.31819300 | 0.66658400  |
| Si | -2.57625200 | -1.44621200 | -0.63346100 |
| C  | -2.26649300 | -3.12840100 | 0.28008100  |
| C  | -1.18385800 | -1.04392800 | -1.86879100 |
| H  | -1.13065500 | -1.82796900 | -2.63455900 |
| H  | -1.36721700 | -0.09622900 | -2.38836300 |
| H  | -0.20942500 | -0.97132500 | -1.37436500 |
| C  | -4.23988500 | -1.52516500 | -1.57378900 |
| H  | -4.27398200 | -2.41732100 | -2.21109200 |
| H  | -5.08873300 | -1.57692600 | -0.88343600 |
| H  | -4.38468600 | -0.65467900 | -2.22213800 |
| C  | -2.00668200 | -4.23923000 | -0.75830200 |
| H  | -1.10044100 | -4.04743500 | -1.34525100 |
| H  | -1.86946900 | -5.20535700 | -0.25156800 |
| H  | -2.84331900 | -4.35724100 | -1.45913800 |
| C  | -1.04609000 | -3.01409000 | 1.21547100  |
| H  | -1.23092800 | -2.28801600 | 2.01459700  |
| H  | -0.84102700 | -3.98587300 | 1.68900100  |
| H  | -0.13843000 | -2.70389100 | 0.68430000  |
| C  | -3.50571200 | -3.49782100 | 1.12115200  |
| H  | -3.73997900 | -2.71614200 | 1.85279600  |
| H  | -4.39456000 | -3.65612600 | 0.49792900  |
| H  | -3.32440000 | -4.43103400 | 1.67456300  |

### R3

|    |             |             |             |
|----|-------------|-------------|-------------|
| C  | -3.61974100 | 3.12730600  | -0.65565600 |
| C  | -2.77476700 | 2.21893100  | -0.23669400 |
| H  | -3.99939200 | 3.13156000  | -1.67674000 |
| C  | -1.95474200 | 1.29493400  | 0.20378900  |
| C  | -0.42010200 | 1.48875600  | 0.17054800  |
| C  | -0.01093600 | 2.50506000  | -0.90405600 |
| C  | 0.03030600  | 1.97407800  | 1.56169000  |
| H  | -0.51224200 | 3.46564000  | -0.75359400 |
| H  | 1.07047600  | 2.67198300  | -0.87597500 |
| H  | -0.27939500 | 2.12594500  | -1.89416700 |
| H  | 1.11867800  | 2.09604100  | 1.60317000  |
| H  | -0.42686400 | 2.94433600  | 1.78073100  |
| H  | -0.27003600 | 1.27355900  | 2.34677100  |
| C  | -2.51112500 | 0.00396700  | 0.79663800  |
| C  | -2.88772500 | -1.03653700 | -0.27387200 |
| H  | -3.39838400 | 0.23389100  | 1.39967700  |
| H  | -1.76748400 | -0.42942200 | 1.47595100  |
| C  | -3.39910100 | -2.35394000 | 0.32265700  |
| H  | -3.65960400 | -0.60470000 | -0.92609900 |
| H  | -2.01350200 | -1.22705500 | -0.90733400 |
| C  | -3.80428700 | -3.37799400 | -0.74318100 |
| H  | -2.62119700 | -2.78715700 | 0.96859200  |
| H  | -4.25775200 | -2.14941200 | 0.97862200  |
| H  | -4.16162300 | -4.30986200 | -0.28961500 |
| H  | -4.60738100 | -2.98825200 | -1.38090700 |
| H  | -2.95760100 | -3.62688100 | -1.39486900 |
| O  | 0.14234200  | 0.21811000  | -0.17508600 |
| Si | 1.49393600  | -0.73277800 | 0.28898800  |
| C  | 1.63903800  | -0.94795400 | 2.18288200  |
| H  | 2.37014300  | -1.73413600 | 2.40705600  |
| H  | 1.95600300  | -0.03960000 | 2.70342400  |
| H  | 0.68000500  | -1.26334000 | 2.60944400  |
| C  | 1.04956300  | -2.42141700 | -0.46888500 |
| H  | 0.09522100  | -2.77324400 | -0.06179600 |
| H  | 0.94126000  | -2.35727500 | -1.55674600 |
| H  | 1.80870700  | -3.17956700 | -0.24650000 |
| C  | 3.18132300  | -0.09449500 | -0.44773700 |
| C  | 4.24901300  | -1.18880900 | -0.22087300 |
| H  | 3.98906900  | -2.12970300 | -0.71965400 |
| H  | 5.21506900  | -0.85930700 | -0.62947100 |
| H  | 4.40387200  | -1.40268900 | 0.84411900  |

|   |             |             |             |
|---|-------------|-------------|-------------|
| C | 3.66330800  | 1.19843100  | 0.23921500  |
| H | 4.63874400  | 1.50152500  | -0.16824200 |
| H | 2.97516700  | 2.03641800  | 0.08105100  |
| H | 3.79038600  | 1.06694800  | 1.32084200  |
| C | 3.03466100  | 0.15256000  | -1.96228400 |
| H | 3.99103500  | 0.49012300  | -2.38748600 |
| H | 2.74367200  | -0.76005700 | -2.49638700 |
| H | 2.28252000  | 0.91791400  | -2.18082000 |
| H | -3.97951600 | 3.92253300  | -0.00327400 |

Cartesian coordinates for the stationary points given in Fig. 6.

### 28

|    |             |             |             |
|----|-------------|-------------|-------------|
| C  | -2.60529600 | 0.07979400  | -0.42822700 |
| C  | -4.25701300 | -0.89842700 | 0.58460800  |
| C  | -4.44386300 | -1.12114300 | -0.79696100 |
| C  | -5.17563300 | -1.41304400 | 1.50664100  |
| C  | -5.52990500 | -1.84185000 | -1.29765300 |
| C  | -6.25894800 | -2.13706100 | 1.01638600  |
| H  | -5.04544400 | -1.24898700 | 2.57327700  |
| C  | -6.43333900 | -2.34806900 | -0.36533000 |
| H  | -5.67364300 | -2.00215900 | -2.36201400 |
| H  | -6.98674800 | -2.54685900 | 1.71077200  |
| H  | -7.29201800 | -2.91543400 | -0.71250500 |
| C  | -3.11245200 | -0.46672400 | -2.84719700 |
| H  | -2.03792300 | -0.39136200 | -3.01996600 |
| H  | -3.46784500 | -1.39942200 | -3.29286900 |
| H  | -3.62414400 | 0.37447600  | -3.32886600 |
| N  | -3.10380700 | -0.14870900 | 0.78062000  |
| C  | -1.32953300 | 0.82184900  | -0.71054600 |
| C  | -0.18632600 | -0.13791900 | -0.95996700 |
| H  | -1.07662600 | 1.44997500  | 0.16799200  |
| H  | -1.48050500 | 1.50519800  | -1.55451500 |
| C  | 0.78558900  | -0.05018200 | -1.88017900 |
| H  | -0.14572600 | -0.97317400 | -0.26806200 |
| N  | -3.36909200 | -0.49726200 | -1.41616000 |
| C  | 1.87171000  | -1.15036700 | -1.92994700 |
| C  | 1.46971100  | -2.17435100 | -3.01440500 |
| C  | 3.26894300  | -0.59298400 | -2.26360900 |
| H  | 1.35017700  | -1.69773200 | -3.99427500 |
| H  | 2.23697500  | -2.95163300 | -3.09921500 |
| H  | 0.52420300  | -2.64886900 | -2.73617300 |
| H  | 3.97803900  | -1.42505400 | -2.31318600 |
| H  | 3.28829100  | -0.08223600 | -3.23135600 |
| H  | 3.61705900  | 0.11091900  | -1.50278900 |
| C  | 0.82847200  | 1.05727900  | -2.92039300 |
| C  | 1.52917200  | 2.35114500  | -2.45283900 |
| H  | -0.19530100 | 1.31991800  | -3.22156800 |
| H  | 1.31692700  | 0.69789000  | -3.83529300 |
| C  | 1.50687200  | 3.45696600  | -3.51641600 |
| H  | 1.04672100  | 2.71014800  | -1.53495900 |
| H  | 2.56912500  | 2.13127400  | -2.18071300 |
| C  | 2.21444600  | 4.73831200  | -3.06247200 |
| H  | 1.97611300  | 3.08567800  | -4.43938700 |
| H  | 0.46372700  | 3.68770800  | -3.77802400 |
| H  | 2.17229100  | 5.51367100  | -3.83620500 |
| H  | 1.75341500  | 5.14443600  | -2.15424400 |
| H  | 3.27127600  | 4.54802700  | -2.83838100 |
| O  | -0.39876900 | 2.10352200  | 2.05506200  |
| C  | -0.05627400 | 3.38223800  | 2.45754000  |
| C  | 0.83152200  | 3.33193600  | 3.72625100  |
| C  | 0.72958500  | 4.10186000  | 1.33170400  |
| C  | -1.32617700 | 4.21599300  | 2.77482200  |
| H  | 0.28416800  | 2.84125400  | 4.54313800  |
| H  | 1.73223300  | 2.74082900  | 3.52463900  |
| H  | 1.14050600  | 4.32760600  | 4.07422800  |
| H  | 0.11001900  | 4.16051000  | 4.42753400  |
| H  | 1.03082800  | 5.12218000  | 1.60669900  |
| H  | 1.63193100  | 3.53003200  | 1.08647000  |
| H  | -1.10642200 | 5.25107800  | 3.07152700  |
| H  | -1.97938100 | 4.24346200  | 1.89302000  |
| H  | -1.88578200 | 3.74594000  | 3.59773500  |
| Na | -1.86521500 | 0.74196600  | 2.52751400  |
| O  | 1.92070600  | -1.90843400 | -0.72200900 |
| Si | 2.42912200  | -1.58397400 | 0.89707100  |

|   |            |             |             |
|---|------------|-------------|-------------|
| C | 2.60572200 | 0.25696700  | 1.34665800  |
| H | 3.10439900 | 0.33263300  | 2.32224300  |
| H | 3.21904400 | 0.81342300  | 0.63016200  |
| H | 1.63736500 | 0.76844900  | 1.43671700  |
| C | 1.05018700 | -2.36261300 | 1.96786200  |
| H | 1.25213000 | -2.21353300 | 3.03485500  |
| H | 0.07987500 | -1.90498400 | 1.74300800  |
| H | 0.95539700 | -3.43896000 | 1.78723100  |
| C | 4.08812700 | -2.55057600 | 1.23291600  |
| C | 5.30165700 | -1.80998400 | 0.63729000  |
| H | 5.24260200 | -1.73182200 | -0.45344900 |
| H | 5.40263700 | -0.79560600 | 1.04219200  |
| H | 6.22881900 | -2.35185400 | 0.87517700  |
| C | 4.29318900 | -2.66945200 | 2.75891600  |
| H | 3.49557500 | -3.24866200 | 3.23845700  |
| H | 5.24266200 | -3.18120400 | 2.97300800  |
| H | 4.33759900 | -1.68817800 | 3.24876100  |
| C | 4.00432400 | -3.96254500 | 0.62137500  |
| H | 3.84281000 | -3.92181800 | -0.46112100 |
| H | 4.93631600 | -4.51674600 | 0.80645300  |
| H | 3.18387900 | -4.54761500 | 1.05555300  |

## TS<sub>28-29</sub>

|   |             |             |             |
|---|-------------|-------------|-------------|
| C | -2.39269100 | -0.12277100 | -0.73585500 |
| C | -3.63271700 | -1.85848800 | -0.26113600 |
| C | -4.46028100 | -0.95663700 | -0.96841200 |
| C | -4.15447600 | -3.08017700 | 0.17597500  |
| C | -5.79675000 | -1.23163500 | -1.24914000 |
| C | -5.49204000 | -3.36586000 | -0.10391900 |
| H | -3.52768900 | -3.78992400 | 0.71033400  |
| C | -6.30160000 | -2.45749600 | -0.80594500 |
| H | -6.42793200 | -0.52836000 | -1.78511000 |
| H | -5.91602000 | -4.31062800 | 0.22551000  |
| H | -7.33889200 | -2.70945000 | -1.00774600 |
| C | -4.05574400 | 1.28322600  | -2.04745500 |
| H | -3.18682000 | 1.71487100  | -2.54741300 |
| H | -4.77104700 | 0.96403100  | -2.81120100 |
| H | -4.52649700 | 2.05291700  | -1.42340500 |
| N | -2.36672500 | -1.31397400 | -0.11674400 |
| C | -1.27352100 | 0.81387000  | -0.74922300 |
| C | 0.03503400  | 0.23045700  | -1.13257300 |
| H | -1.11079700 | 1.14043300  | 0.62276200  |
| H | -1.50421700 | 1.76030800  | -1.24196700 |
| C | 1.12504700  | 0.85171200  | -1.63251100 |
| H | 0.12135000  | -0.84402700 | -0.97817100 |
| N | -3.64635000 | 0.13223900  | -1.26682500 |
| C | 2.38420400  | 0.03374300  | -1.98771900 |
| C | 2.27016300  | -0.45519600 | -3.44624700 |
| C | 3.68978400  | 0.83616000  | -1.83233200 |
| H | 2.14285200  | 0.38930900  | -4.13308100 |
| H | 3.16974100  | -1.00955100 | -3.73842100 |
| H | 1.40335200  | -1.11463800 | -3.54460400 |
| H | 4.53556600  | 0.19922700  | -2.10999900 |
| H | 3.70982100  | 1.71562500  | -2.48295300 |
| H | 3.83595900  | 1.17842700  | -0.80364100 |
| C | 1.09368700  | 2.32296700  | -2.00795400 |
| C | 1.48663300  | 3.29929200  | -0.87898000 |
| H | 0.07967500  | 2.58392900  | -2.34232200 |
| H | 1.74037600  | 2.50949000  | -2.87650000 |
| C | 1.35453600  | 4.77226700  | -1.28854500 |
| H | 0.85857100  | 3.09855900  | -0.00230200 |
| C | 2.52064100  | 3.10556500  | -0.56414600 |
| C | 1.76304100  | 5.74746500  | -0.17898100 |
| H | 1.96780200  | 4.95801500  | -2.18256400 |
| H | 0.31556900  | 4.97358600  | -1.58790000 |
| H | 1.65519900  | 6.79003900  | -0.50075300 |
| H | 1.14536000  | 5.60866500  | 0.71666600  |
| H | 2.80930400  | 5.59657800  | 0.11511000  |
| O | -0.83123300 | 1.10579600  | 1.83914700  |
| C | -1.51007400 | 2.02819300  | 2.67331900  |
| C | -1.12028700 | 1.71808800  | 4.12954100  |
| C | -1.07856500 | 3.46529900  | 2.32140300  |
| C | -3.03690300 | 1.88574000  | 2.50270800  |
| H | -1.43301600 | 0.70093000  | 4.40209700  |
| H | -0.03336200 | 1.78585700  | 4.25116900  |
| H | -1.59143800 | 2.41340800  | 4.83553200  |
| H | -1.34287200 | 3.70079900  | 1.28388500  |
| H | -1.56038800 | 4.20670300  | 2.97122100  |

|    |             |             |             |
|----|-------------|-------------|-------------|
| H  | 0.00718100  | 3.56640700  | 2.42585500  |
| H  | -3.58629400 | 2.57790400  | 3.15299000  |
| H  | -3.33085100 | 2.09049400  | 1.46667600  |
| H  | -3.35775400 | 0.86484200  | 2.74612000  |
| Na | -0.81207000 | -1.03648600 | 1.56187600  |
| O  | 2.48470600  | -1.18096700 | -1.21684900 |
| Si | 2.75131300  | -1.50701300 | 0.44009200  |
| C  | 2.61185800  | -0.01329200 | 1.62010500  |
| H  | 2.76497200  | -0.35799500 | 2.65163800  |
| H  | 3.37786300  | 0.74254900  | 1.41870800  |
| H  | 1.63931900  | 0.49074300  | 1.57035900  |
| C  | 1.39212200  | -2.79084800 | 0.91362900  |
| H  | 1.14638600  | -2.75419000 | 1.98593000  |
| H  | 0.48511900  | -2.66594000 | 0.30899700  |
| H  | 1.73160700  | -3.81349800 | 0.71710300  |
| C  | 4.47352400  | -2.38549900 | 0.64903300  |
| C  | 5.63364000  | -1.38430100 | 0.48609900  |
| H  | 5.64603100  | -0.93241900 | -0.51110500 |
| H  | 5.58480700  | -0.57391800 | 1.22361900  |
| H  | 6.59653700  | -1.89628800 | 0.62650200  |
| C  | 4.55648500  | -3.00935200 | 2.05900900  |
| H  | 3.76698500  | -3.75040200 | 2.23378400  |
| H  | 5.51889500  | -3.52548900 | 2.18560400  |
| H  | 4.48985600  | -2.25236200 | 2.85077100  |
| C  | 4.61585100  | -3.49684700 | -0.41033600 |
| H  | 4.54522000  | -3.09341900 | -1.42600800 |
| H  | 5.58985600  | -3.99690700 | -0.30835100 |
| H  | 3.84248500  | -4.26825200 | -0.30594400 |

## 29

|   |             |             |             |
|---|-------------|-------------|-------------|
| C | -2.32317800 | -0.13855100 | -0.99320300 |
| C | -3.55243000 | -1.82990000 | -0.31911800 |
| C | -4.43990800 | -0.91316000 | -0.93675700 |
| C | -4.05752500 | -3.02092300 | 0.21145200  |
| C | -5.80661400 | -1.14762300 | -1.03425500 |
| C | -5.43198000 | -3.26698800 | 0.11308400  |
| H | -3.39024100 | -3.74366000 | 0.67528600  |
| C | -6.29461200 | -2.34910300 | -0.50036800 |
| H | -6.47849900 | -0.43189100 | -1.50056500 |
| H | -5.83737800 | -4.19065700 | 0.51833200  |
| C | -7.35730400 | -2.56653800 | -0.56314300 |
| H | -4.07694200 | 1.25183200  | -2.18379400 |
| H | -3.27198800 | 1.53544700  | -2.86789800 |
| H | -4.94364300 | 0.94389700  | -2.77651000 |
| H | -4.35805000 | 2.13146100  | -1.58828800 |
| N | -2.26235800 | -1.33251600 | -0.34489500 |
| C | -1.23470800 | 0.74011400  | -1.21369700 |
| C | 0.11514900  | 0.23830600  | -1.34708300 |
| H | -1.19308400 | 1.39591900  | 0.81881200  |
| H | -1.46126200 | 1.72919400  | -1.60240300 |
| C | 1.26549600  | 0.91708000  | -1.62657800 |
| H | 0.21638900  | -0.84653600 | -1.27175800 |
| N | -3.64081100 | 0.14531500  | -1.36148400 |
| C | 2.56946600  | 0.14881900  | -1.90623600 |
| C | 2.61274600  | -0.26482900 | -3.39217500 |
| C | 3.83554400  | 0.96462000  | -1.58362200 |
| H | 2.52858600  | 0.61410900  | -4.04147900 |
| H | 3.55043600  | -0.78359900 | -3.62641200 |
| H | 1.77603500  | -0.93458800 | -3.60932300 |
| H | 4.72114900  | 0.36288000  | -1.80994400 |
| H | 3.89460200  | 1.87535700  | -2.18667200 |
| H | 3.87490800  | 1.26000400  | -0.53072500 |
| C | 1.23249700  | 2.41159000  | -1.89241100 |
| C | 1.41450700  | 3.30320200  | -0.64474500 |
| H | 0.27218600  | 2.67355500  | -2.35954400 |
| H | 1.99328800  | 2.69229400  | -2.63354000 |
| C | 1.29322700  | 4.80238800  | -0.94886200 |
| H | 0.66892100  | 3.01691900  | 0.10919000  |
| C | 2.39538500  | 3.10603800  | -0.19080800 |
| C | 1.48824500  | 5.69041000  | 0.28483900  |
| H | 2.03113100  | 5.07738600  | -1.71657500 |
| H | 0.30735900  | 5.00377700  | -1.39272400 |
| H | 1.39342000  | 6.75369300  | 0.03476100  |
| H | 0.74408700  | 5.46272700  | 1.05836700  |
| H | 2.48052800  | 5.54037900  | 0.72852100  |
| O | -0.97437200 | 1.21817700  | 1.77422600  |
| C | -1.89533000 | 1.91968500  | 2.64500300  |
| C | -1.51547500 | 1.49468800  | 4.06544800  |

|    |             |             |             |
|----|-------------|-------------|-------------|
| C  | -1.69904200 | 3.43044300  | 2.45781100  |
| C  | -3.33576000 | 1.50695200  | 2.31209400  |
| H  | -1.64581000 | 0.41323300  | 4.19459400  |
| H  | -0.46999500 | 1.74577600  | 4.27425300  |
| H  | -2.14702700 | 2.00005300  | 4.80371300  |
| H  | -1.93137800 | 3.72655700  | 1.42790200  |
| H  | -2.35553500 | 3.99831400  | 3.12704200  |
| H  | -0.66162000 | 3.71064500  | 2.66807200  |
| H  | -4.04994700 | 2.00975600  | 2.97420300  |
| H  | -3.58914600 | 1.77043300  | 1.27910800  |
| H  | -3.46862100 | 0.42518000  | 2.42224200  |
| Na | -0.57935900 | -0.89534200 | 1.10751400  |
| O  | 2.62182600  | -1.11297700 | -1.19607200 |
| Si | 2.83782600  | -1.54315700 | 0.43848800  |
| C  | 2.65474600  | -0.11166100 | 1.69770600  |
| H  | 2.60540500  | -0.52136100 | 2.71519900  |
| H  | 3.50806500  | 0.57352900  | 1.66813000  |
| H  | 1.76047400  | 0.49929500  | 1.52878200  |
| C  | 1.44885300  | -2.83188000 | 0.80108000  |
| H  | 1.08153400  | -2.77927000 | 1.83729100  |
| H  | 0.60941400  | -2.74842200 | 0.09926400  |
| H  | 1.82419600  | -3.85299400 | 0.67390100  |
| C  | 4.54564100  | -2.43858300 | 0.67769000  |
| C  | 5.72304600  | -1.45189700 | 0.55890000  |
| H  | 5.77217700  | -0.99280000 | -0.43363900 |
| H  | 5.66500800  | -0.64681100 | 1.30156300  |
| H  | 6.67345900  | -1.97935600 | 0.72401300  |
| C  | 4.58273600  | -3.08267400 | 2.08041300  |
| H  | 3.77295600  | -3.80728000 | 2.22816900  |
| H  | 5.53018200  | -3.62200500 | 2.22106300  |
| H  | 4.51528600  | -2.33391100 | 2.87986100  |
| C  | 4.70120400  | -3.53497000 | -0.39576300 |
| H  | 4.66098500  | -3.11447700 | -1.40632100 |
| H  | 5.66713700  | -4.04672300 | -0.27784700 |
| H  | 3.91800600  | -4.29974200 | -0.32284300 |

### 30

|   |             |             |             |
|---|-------------|-------------|-------------|
| C | -2.13342200 | -0.09178200 | -1.56074700 |
| C | -2.93193700 | -1.81795200 | -0.46268000 |
| C | -4.02722000 | -1.25047100 | -1.16769900 |
| C | -3.14720200 | -2.94958200 | 0.33230100  |
| C | -5.31404800 | -1.77006900 | -1.09292000 |
| C | -4.44068400 | -3.48192000 | 0.40839200  |
| H | -2.32002400 | -3.41249700 | 0.86583000  |
| C | -5.50811700 | -2.90614400 | -0.29164100 |
| H | -6.14426100 | -1.31898400 | -1.63035400 |
| H | -4.61803600 | -4.36231300 | 1.02138700  |
| H | -6.50117200 | -3.34076600 | -0.21538400 |
| C | -4.18658300 | 0.63677300  | -2.84052400 |
| H | -4.65771100 | 1.52576000  | -2.39818800 |
| H | -3.46915200 | 0.96153300  | -3.60022800 |
| H | -4.96432900 | 0.03793300  | -3.32577000 |
| N | -1.78509300 | -1.08265700 | -0.68770300 |
| C | -1.26111300 | 0.89828100  | -2.04789100 |
| C | 0.14036600  | 0.70207200  | -1.87570200 |
| H | -0.22431800 | 2.08016800  | 1.90552900  |
| H | -1.66574000 | 1.85190200  | -2.37329500 |
| C | 1.16781900  | 1.58412400  | -1.66008700 |
| H | 0.42199100  | -0.35331500 | -1.83738000 |
| N | -3.49673700 | -0.16830100 | -1.86033700 |
| C | 2.56946000  | 1.01452700  | -1.42124600 |
| C | 3.17346600  | 0.49294900  | -2.73832300 |
| C | 3.51830800  | 2.03355400  | -0.77126500 |
| H | 3.19175600  | 1.29973500  | -3.47976700 |
| H | 4.19862200  | 0.12556500  | -2.61615600 |
| H | 2.55134500  | -0.31286200 | -3.13896500 |
| H | 4.48721200  | 1.57531000  | -0.55211300 |
| H | 3.71093000  | 2.87928400  | -1.43827700 |
| C | 3.10339500  | 2.42116700  | 0.16443800  |
| C | 0.90993200  | 3.07990900  | -1.69438400 |
| C | 0.33668700  | 3.66779500  | -0.38321300 |
| H | 0.18910400  | 3.29787900  | -2.49489900 |
| H | 1.81298700  | 3.64331200  | -1.96098900 |
| C | 0.00584300  | 5.16361800  | -0.46678400 |
| H | -0.57555000 | 3.10724800  | -0.13084700 |
| H | 1.05691200  | 3.50503300  | 0.43430900  |
| C | -0.57538600 | 5.73171200  | 0.83251700  |
| H | 0.91462600  | 5.72092600  | -0.73530600 |

|    |             |             |             |
|----|-------------|-------------|-------------|
| H  | -0.70547400 | 5.32808800  | -1.28825200 |
| H  | -0.80096300 | 6.80043100  | 0.74067600  |
| H  | -1.50786300 | 5.22069900  | 1.10592800  |
| H  | 0.12716100  | 5.61342300  | 1.66780100  |
| O  | -0.35673900 | 1.16067200  | 2.19314100  |
| C  | -1.52838400 | 1.11862100  | 3.06451200  |
| C  | -1.21945300 | 1.93418600  | 4.32508400  |
| C  | -2.73428100 | 1.68552900  | 2.30622300  |
| C  | -1.73283700 | -0.36074500 | 3.39425800  |
| H  | -0.33576200 | 1.53527500  | 4.83401600  |
| H  | -1.02711600 | 2.98493600  | 4.07369900  |
| H  | -2.06353700 | 1.90887500  | 5.02311200  |
| H  | -2.91049800 | 1.11886300  | 1.38641800  |
| H  | -3.63894600 | 1.63541100  | 2.92229700  |
| H  | -2.57079900 | 2.73841800  | 2.04183300  |
| H  | -2.56612200 | -0.48124700 | 4.09416200  |
| H  | -1.97159700 | -0.93521800 | 2.49212200  |
| H  | -0.83348800 | -0.77935100 | 3.86078700  |
| Na | 0.10693500  | -0.21536700 | 0.43268400  |
| O  | 2.41297400  | -0.13810200 | -0.49260600 |
| Si | 3.60442100  | -1.12661700 | 0.28235600  |
| C  | 2.87323900  | -2.92741300 | 0.31689600  |
| C  | 3.81958700  | -0.44933900 | 2.05416300  |
| C  | 4.18660900  | 0.58272500  | 2.02670800  |
| H  | 2.87376300  | -0.44486900 | 2.60872000  |
| H  | 4.54040400  | -1.04489400 | 2.62588300  |
| C  | 5.32316700  | -1.17795900 | -0.55169400 |
| H  | 5.97607200  | -1.83102200 | 0.04049300  |
| H  | 5.28886600  | -1.57991900 | -1.56825300 |
| H  | 5.80430800  | -0.19598800 | -0.59380600 |
| C  | 3.75209900  | -3.80373000 | 1.23627200  |
| H  | 3.73261800  | -3.45984200 | 2.27766800  |
| H  | 3.38547600  | -4.83985200 | 1.22791200  |
| H  | 4.79912100  | -3.82926100 | 0.90990900  |
| C  | 1.42750300  | -2.94106800 | 0.85562400  |
| H  | 0.71976900  | -2.53019900 | 0.12592500  |
| H  | 1.10152800  | -3.97427100 | 1.04155300  |
| H  | 1.32705600  | -2.40428100 | 1.81030700  |
| C  | 2.86838400  | -3.52789200 | -1.10439600 |
| H  | 2.27779000  | -2.91869300 | -1.79863600 |
| H  | 3.88094700  | -3.62395300 | -1.51361400 |
| H  | 2.42567000  | -4.53396100 | -1.08971400 |

### TS<sub>30</sub>-TP<sub>2</sub>

|   |             |             |             |
|---|-------------|-------------|-------------|
| C | -2.71359200 | 0.14406700  | -0.52657500 |
| C | -3.92066400 | -1.22446200 | 0.66911300  |
| C | -4.76560800 | -0.72921700 | -0.35236900 |
| C | -4.42393300 | -2.13688000 | 1.60281500  |
| C | -6.09943300 | -1.11529500 | -0.47269800 |
| C | -5.75744300 | -2.53027900 | 1.48806800  |
| H | -3.78610800 | -2.53152000 | 2.38951700  |
| C | -6.58298900 | -2.02968800 | 0.46617500  |
| H | -6.74119200 | -0.72456100 | -1.25723700 |
| H | -6.16764700 | -3.23953300 | 2.20175100  |
| H | -7.61690100 | -2.35742900 | 0.40526700  |
| C | -4.37598900 | 0.81091200  | -2.31658500 |
| H | -4.93105200 | 1.73306800  | -2.10504400 |
| H | -3.48455000 | 1.05539500  | -2.89754800 |
| H | -5.01054000 | 0.14692900  | -2.91208600 |
| N | -2.66396400 | -0.65400300 | 0.55391700  |
| C | -1.61620000 | 0.94481700  | -1.00771400 |
| C | -0.30586100 | 0.54002900  | -0.85955200 |
| H | 1.07229700  | 1.48760500  | 0.48807700  |
| H | -1.85393800 | 1.90994500  | -1.44548100 |
| C | 0.90933900  | 1.30233200  | -0.95739800 |
| H | -0.15793900 | -0.49770000 | -0.55568700 |
| N | -3.97453800 | 0.13441100  | -1.09880600 |
| C | 2.12774400  | 0.45778600  | -1.45083600 |
| C | 2.00576200  | 0.19081100  | -2.96550100 |
| C | 3.46882300  | 1.14607200  | -1.14894200 |
| H | 1.93688300  | 1.13200300  | -3.52174300 |
| H | 2.86990800  | -0.35882400 | -3.35355000 |
| H | 1.10051500  | -0.39078500 | -3.16852600 |
| H | 4.30408500  | 0.55433100  | -1.54331300 |
| H | 3.53236600  | 2.13545000  | -1.61205000 |
| H | 3.60691200  | 1.26333800  | -0.07101100 |
| C | 0.76077400  | 2.67863200  | -1.63476600 |
| C | 0.21056300  | 3.81313600  | -0.74911700 |



|    |             |             |             |
|----|-------------|-------------|-------------|
| H  | 0.10945500  | 2.58782000  | -2.52193700 |
| H  | 1.72795800  | 3.01505100  | -2.02777500 |
| C  | -0.07431000 | 5.09879700  | -1.53697800 |
| H  | -0.70573200 | 3.48744300  | -0.24057000 |
| H  | 0.93022700  | 4.02824600  | 0.04782100  |
| C  | -0.58667500 | 6.24497600  | -0.65776000 |
| H  | 0.84169300  | 5.41854300  | -2.05535400 |
| H  | -0.80901400 | 4.88835700  | -2.32837600 |
| H  | -0.78259000 | 7.14922200  | -1.24623000 |
| H  | -1.51993900 | 5.96855700  | -0.15080600 |
| H  | 0.14402900  | 6.50434300  | 0.11836000  |
| O  | 0.83834200  | 1.53622700  | 1.70671800  |
| C  | 1.75973200  | 1.95918300  | 2.69440600  |
| C  | 2.80718200  | 0.86001700  | 2.96130100  |
| C  | 2.46725900  | 3.26211100  | 2.27496400  |
| C  | 0.95762400  | 2.22051800  | 3.98547800  |
| H  | 2.30969200  | -0.07281000 | 3.25565500  |
| H  | 3.38929300  | 0.65598000  | 2.05774900  |
| H  | 3.50355100  | 1.14282400  | 3.76107200  |
| H  | 1.73638400  | 4.06523000  | 2.13386700  |
| H  | 3.18882500  | 3.58601200  | 3.03529100  |
| H  | 3.00896300  | 3.12480400  | 1.33284400  |
| H  | 1.59623300  | 2.58344200  | 4.80058100  |
| H  | 0.17761100  | 2.96766600  | 3.79871800  |
| H  | 0.47459100  | 1.29562300  | 4.33259600  |
| Na | -0.85546600 | 0.20783400  | 1.72162500  |
| O  | 2.06798100  | -0.80171400 | -0.74434000 |
| Si | 3.11926800  | -2.15092700 | -0.65477600 |
| C  | 1.97774100  | -3.56141100 | 0.03692800  |
| C  | 4.57872500  | -1.83555700 | 0.53523700  |
| H  | 5.24414200  | -1.05279200 | 0.15602700  |
| H  | 4.23583400  | -1.52715600 | 1.52786500  |
| H  | 5.17779000  | -2.74660500 | 0.65341600  |
| C  | 3.85198200  | -2.67833000 | -2.33984900 |
| H  | 4.40048000  | -3.62106300 | -2.22246300 |
| H  | 3.07882500  | -2.83273700 | -3.09887800 |
| H  | 4.56029900  | -1.93718200 | -2.72608300 |
| C  | 2.81012600  | -4.83598500 | 0.28700800  |
| H  | 3.60147100  | -4.67312700 | 1.02880500  |
| H  | 2.16553000  | -5.64078700 | 0.66886800  |
| H  | 3.28163600  | -5.20752500 | -0.63119600 |
| C  | 1.33361400  | -3.11796100 | 1.36565700  |
| H  | 0.71130900  | -2.22715900 | 1.22154000  |
| H  | 0.69054400  | -3.91669300 | 1.76381100  |
| H  | 2.08442600  | -2.88475400 | -2.13073300 |
| C  | 0.86418000  | -3.87454300 | -0.98236200 |
| H  | 0.25338300  | -2.99064000 | -1.19726400 |
| H  | 1.27269900  | -4.23962000 | -1.93265900 |
| H  | 0.19576200  | -4.65590700 | -0.59205100 |

### 31

|   |             |             |             |
|---|-------------|-------------|-------------|
| C | -3.44843600 | 0.84059700  | -0.57919500 |
| C | -4.85122100 | -0.84631000 | -0.47375300 |
| C | -5.64013400 | 0.33343500  | -0.46711100 |
| C | -5.48455600 | -2.09190100 | -0.41725800 |
| C | -7.02837000 | 0.30376100  | -0.39893100 |
| C | -6.88241200 | -2.13044800 | -0.35394100 |
| H | -4.89848300 | -3.00775700 | -0.43638200 |
| C | -7.64489500 | -0.95502200 | -0.34701000 |
| H | -7.61937400 | 1.21579400  | -0.38420000 |
| H | -7.38670700 | -3.09272500 | -0.31175600 |
| H | -8.72876700 | -1.01551600 | -0.29859500 |
| C | -5.06387800 | 2.78147000  | -0.70863000 |
| H | -4.26771100 | 3.26834000  | -1.27935400 |
| H | -6.00185500 | 2.87222400  | -1.26627100 |
| H | -5.17820000 | 3.30211400  | 0.25207900  |
| N | -3.50881000 | -0.52054800 | -0.51332100 |
| C | -2.25763800 | 1.59495000  | -0.61730300 |
| C | -1.03491000 | 1.01540700  | -1.09177700 |
| H | 1.21195300  | -1.22391400 | 0.57202300  |
| H | -2.27525800 | 2.62150200  | -0.26482200 |
| C | 0.25711500  | 1.39686400  | -0.83497100 |
| H | -1.18497700 | 0.14226000  | -1.73059500 |
| N | -4.73314800 | 1.38512800  | -0.54183600 |
| C | 1.45213900  | 0.75047700  | -1.52413500 |
| C | 1.10610100  | -0.47897200 | -2.37825800 |
| C | 2.16183500  | 1.77237700  | -2.43445400 |
| H | 0.44599600  | -0.22059000 | -3.21150100 |

|    |             |             |             |
|----|-------------|-------------|-------------|
| H  | 2.02596400  | -0.90190300 | -2.79513600 |
| H  | 0.62055400  | -1.25514700 | -1.78044500 |
| H  | 3.07542000  | 1.36102100  | -2.87942300 |
| H  | 1.48378000  | 2.03918300  | -3.25184500 |
| H  | 2.41662200  | 2.69351000  | -1.90694900 |
| C  | 0.53475100  | 2.54727100  | 0.11938500  |
| C  | 0.24527000  | 2.21927200  | 1.60015600  |
| H  | -0.06167900 | 3.43030900  | -0.15953200 |
| H  | 1.58089000  | 2.86522200  | 0.04583300  |
| C  | 0.52298000  | 3.38583500  | 2.55669500  |
| H  | -0.81061500 | 1.92582200  | 1.69706800  |
| H  | 0.84907800  | 1.34986000  | 1.89488200  |
| C  | 0.22369200  | 3.05142300  | 4.02214300  |
| H  | 1.57483600  | 3.69319300  | 2.45970700  |
| H  | -0.07554700 | 4.25557800  | 2.25034000  |
| H  | 0.43515100  | 3.90128000  | 4.68158900  |
| H  | -0.83100300 | 2.78024200  | 4.15843300  |
| H  | 0.83005800  | 2.20407600  | 4.36702700  |
| O  | 0.45027200  | -1.67048000 | 1.00497300  |
| C  | 0.70561100  | -3.07225300 | 1.27416800  |
| C  | 1.91593400  | -3.20636200 | 2.20560500  |
| C  | -0.56351700 | -3.57782900 | 1.96877800  |
| C  | 0.93470800  | -3.82044000 | -0.04551800 |
| H  | 2.82707900  | -2.85079100 | 1.71295200  |
| H  | 1.76448000  | -2.62127600 | 3.11867400  |
| H  | 2.07702300  | -4.25330200 | 2.48631400  |
| H  | -1.43652400 | -3.48722400 | 1.30929100  |
| H  | -0.46483600 | -4.63495100 | 2.23504700  |
| H  | -0.75327700 | -3.01297800 | 2.88912800  |
| H  | 1.09721900  | -4.88902100 | 0.13511900  |
| H  | 0.06810200  | -3.71210400 | -0.70701000 |
| H  | 1.81524500  | -3.43024000 | -0.56691200 |
| O  | 2.35474700  | 0.24270200  | -0.46070200 |
| Si | 4.00380500  | 0.54558100  | -0.04071300 |
| C  | 4.59355100  | 2.34687800  | -0.28641100 |
| H  | 5.54153400  | 2.47671100  | 0.24970000  |
| H  | 4.76052000  | 2.62129300  | -1.33133400 |
| H  | 3.87924900  | 3.05799800  | 0.14159000  |
| C  | 4.02553600  | 0.22276800  | 1.83776400  |
| H  | 5.01697100  | 0.41823400  | 2.26162000  |
| H  | 3.31311900  | 0.89209400  | 2.33297700  |
| H  | 3.74784400  | -0.80327300 | 2.09618600  |
| C  | 5.23243300  | -0.66873100 | -0.94738100 |
| C  | 6.64001200  | -0.48378500 | -0.33753700 |
| H  | 6.66113900  | -0.71391000 | 0.73445500  |
| H  | 7.35372000  | -1.15997800 | -0.82965900 |
| H  | 7.01708500  | 0.53747900  | -0.47062000 |
| C  | 5.31364400  | -0.38108400 | -2.45946100 |
| H  | 6.05065600  | -1.04696900 | -2.93141900 |
| H  | 4.35505500  | -0.55158800 | -2.96237000 |
| H  | 5.62642500  | 0.64910300  | -2.66930000 |
| C  | 4.78899200  | -2.12992900 | -0.74362600 |
| H  | 5.48895800  | -2.81592000 | -1.24226200 |
| H  | 4.76487000  | -2.40647800 | 0.31772300  |
| H  | 3.79310100  | -2.31095700 | -1.16450100 |
| Na | -1.53823700 | -0.70383800 | 0.65510500  |

### TS<sub>31-P3'</sub>

|   |             |             |             |
|---|-------------|-------------|-------------|
| C | -3.42022400 | 0.74710500  | -0.42132900 |
| C | -4.75745600 | -0.91863400 | 0.04167900  |
| C | -5.57988900 | 0.22035400  | -0.13633300 |
| C | -5.34214100 | -2.15133500 | 0.35132800  |
| C | -6.96627000 | 0.16822600  | -0.01267400 |
| C | -6.73161000 | -2.21272300 | 0.47364500  |
| H | -4.72583600 | -3.03691100 | 0.48274000  |
| C | -7.53274400 | -1.07319900 | 0.29305500  |
| H | -7.58738800 | 1.04982500  | -0.14417200 |
| H | -7.20431000 | -3.16184400 | 0.71161700  |
| H | -8.61127700 | -1.15484000 | 0.39446700  |
| C | -5.09582400 | 2.60830400  | -0.80244300 |
| H | -4.31739000 | 3.04421800  | -1.43268400 |
| H | -6.02947000 | 2.57665800  | -1.37257900 |
| H | -5.24306200 | 3.24725900  | 0.07755400  |
| N | -3.42826400 | -0.56728600 | -0.11516700 |
| C | -2.24143200 | 1.52606100  | -0.64427600 |
| C | -1.06353900 | 0.95519700  | -1.14191700 |
| H | 1.30950700  | -1.33740900 | 0.15378300  |
| H | -2.28262200 | 2.58389600  | -0.40604900 |

|    |             |             |             |
|----|-------------|-------------|-------------|
| C  | 0.21430000  | 1.52065200  | -1.25076800 |
| H  | -1.18939900 | -0.05727700 | -1.52587400 |
| N  | -4.70904700 | 1.26163600  | -0.43490500 |
| C  | 1.28536200  | 0.78691400  | -1.87370600 |
| C  | 0.95856500  | -0.47118600 | -2.66241700 |
| C  | 2.38607700  | 1.56907900  | -2.56560400 |
| H  | 0.40378200  | -0.20851200 | -3.57289200 |
| H  | 1.88237000  | -0.97394600 | -2.95591900 |
| H  | 0.36371300  | -1.18474700 | -2.09253100 |
| H  | 3.21887200  | 0.91619300  | -2.83450300 |
| H  | 1.97556200  | 1.98922600  | -3.49542100 |
| H  | 2.77431300  | 2.39747200  | -1.97711300 |
| C  | 0.41494200  | 2.91327200  | -0.67142300 |
| C  | 0.41289600  | 2.96851800  | 0.87260100  |
| H  | -0.38050000 | 3.58076700  | -1.03959800 |
| H  | 1.34738400  | 3.36122200  | -1.02578900 |
| C  | 0.58909900  | 4.38593600  | 1.43262500  |
| H  | -0.52969400 | 2.54885400  | 1.25070200  |
| H  | 1.21310600  | 2.32138700  | 1.25354500  |
| C  | 0.57152700  | 4.43741700  | 2.96419400  |
| H  | 1.53607700  | 4.80688700  | 1.06465700  |
| H  | -0.20467900 | 5.03503000  | 1.03486900  |
| H  | 0.70424500  | 5.46077100  | 3.33426500  |
| H  | -0.37910300 | 4.06066400  | 3.36295600  |
| H  | 1.37482700  | 3.82312500  | 3.38962200  |
| O  | 0.54966000  | -1.87446200 | 0.55703400  |
| C  | 0.75554500  | -3.30108700 | 0.56741500  |
| C  | 1.76133100  | -3.67219500 | 1.66729500  |
| C  | -0.61420600 | -3.91648400 | 0.88518000  |
| C  | 1.24347100  | -3.77314900 | -0.80917900 |
| H  | 2.74427000  | -3.24071400 | 1.46053000  |
| H  | 1.41835200  | -3.29593400 | 2.63753100  |
| H  | 1.87885900  | -4.75978700 | 1.74173900  |
| H  | -1.35163700 | -3.64833600 | 0.11833000  |
| H  | -0.55466800 | -5.00928200 | 0.92462600  |
| H  | -0.97714500 | -3.57202000 | 1.86313500  |
| H  | 1.43972800  | -4.85137100 | -0.80528100 |
| H  | 0.49243800  | -3.56400100 | -1.57854200 |
| H  | 2.16758300  | -3.25751900 | -1.08862400 |
| O  | 2.27592400  | -0.12884300 | -0.51400800 |
| Si | 3.66333800  | 0.31143000  | 0.35517000  |
| C  | 4.15772600  | 2.16543800  | 0.24266800  |
| H  | 4.86069100  | 2.39392400  | 1.05280200  |
| H  | 4.64955900  | 2.43015700  | -0.69904100 |
| H  | 3.29422200  | 2.82580000  | 0.36920800  |
| C  | 3.33198000  | 0.00403600  | 2.22021900  |
| H  | 4.23664500  | 0.16396700  | 2.81947800  |
| H  | 2.56975500  | 0.70446500  | 2.58368700  |
| H  | 2.96918600  | -1.00878300 | 2.42115400  |
| C  | 5.24460600  | -0.71337300 | -0.19279800 |
| C  | 6.49543400  | -0.15937700 | 0.52041200  |
| H  | 6.40392200  | -0.20720600 | 1.61288000  |
| H  | 7.38327100  | -0.74750800 | 0.24320600  |
| H  | 6.69750000  | 0.88289400  | 0.24766900  |
| C  | 5.44839500  | -0.60083200 | -1.71539700 |
| H  | 6.34560200  | -1.15644000 | -2.02775900 |
| H  | 4.59468200  | -1.01532300 | -2.26440700 |
| H  | 5.58312400  | 0.43979700  | -2.03655400 |
| C  | 5.09172500  | -2.20063400 | 0.17225400  |
| H  | 5.98179900  | -2.76884200 | -0.13791900 |
| H  | 4.97299100  | -2.34684800 | 1.25305100  |
| H  | 4.22683100  | -2.65139300 | -0.32777300 |
| Na | -1.31660800 | -0.77231900 | 0.78993700  |

## TBSONa

|    |             |             |             |
|----|-------------|-------------|-------------|
| O  | 1.65180700  | -0.06796600 | -0.01602200 |
| Si | 0.18711200  | 0.67322600  | -0.00103400 |
| C  | -0.03519500 | 1.79569200  | 1.54397400  |
| H  | -1.00921500 | 2.30048800  | 1.55307300  |
| H  | 0.05392200  | 1.22575100  | 2.47674300  |
| H  | 0.73793600  | 2.57438100  | 1.55987500  |
| C  | -0.05561000 | 1.81608200  | -1.52765700 |
| H  | -1.02997600 | 2.32017600  | -1.51760800 |
| H  | 0.71687500  | 2.59539300  | -1.54296800 |
| H  | 0.02219900  | 1.25859900  | -2.46887600 |
| C  | -1.25435500 | -0.65512400 | 0.00009100  |
| C  | -2.64194400 | 0.01197300  | 0.01384400  |
| H  | -2.79959300 | 0.64714800  | -0.86692800 |

|    |             |             |             |
|----|-------------|-------------|-------------|
| H  | -3.44005700 | -0.74738100 | 0.01484000  |
| H  | -2.78717200 | 0.63638900  | 0.90441600  |
| C  | -1.11436200 | -1.55171400 | 1.24501900  |
| H  | -1.87892500 | -2.34471800 | 1.24740400  |
| H  | -0.12940800 | -2.03461700 | 1.27604300  |
| H  | -1.23340100 | -0.98022700 | 2.17441700  |
| C  | -1.13087800 | -1.53535500 | -1.25819100 |
| H  | -1.89575100 | -2.32806800 | -1.26111700 |
| H  | -1.26176500 | -0.95157700 | -2.17828100 |
| H  | -0.14655700 | -2.01782700 | -1.30846000 |
| Na | 3.42190200  | -0.93860600 | -0.00203700 |

## TP2

|    |             |             |             |
|----|-------------|-------------|-------------|
| C  | 2.38495700  | -0.02442600 | 0.10021400  |
| C  | 3.30020300  | -1.94426300 | -0.21916700 |
| C  | 4.33397800  | -1.09113900 | 0.24090300  |
| C  | 3.58735700  | -3.28363600 | -0.51839200 |
| C  | 5.64750200  | -1.53202600 | 0.41762600  |
| C  | 4.89452300  | -3.72901700 | -0.34837000 |
| H  | 2.80078500  | -3.94351400 | -0.87158500 |
| C  | 5.91006400  | -2.86659800 | 0.11273100  |
| H  | 6.43393600  | -0.87592200 | 0.78027500  |
| H  | 5.14178500  | -4.76301900 | -0.57313500 |
| H  | 6.91895200  | -3.25051000 | 0.23677700  |
| C  | 4.39908400  | 1.33528800  | 0.90561100  |
| H  | 4.41567500  | 1.38575800  | 2.00156700  |
| H  | 5.42967800  | 1.33754100  | 0.53977600  |
| H  | 3.90284400  | 2.22594100  | 0.51584300  |
| N  | 2.10794400  | -1.25527000 | -0.29221800 |
| C  | 1.41585900  | 1.06225300  | 0.19841700  |
| C  | 0.16564700  | 0.94658200  | -0.28089400 |
| H  | -1.37390400 | 2.04027500  | -1.20580200 |
| H  | 1.74250600  | 1.97086600  | 0.69579700  |
| C  | -0.95829000 | 1.95139400  | -0.18935100 |
| H  | -0.09368700 | 0.01037900  | -0.76398600 |
| N  | 3.72819000  | 0.14027500  | 0.42997000  |
| C  | -2.14741800 | 1.33651300  | 0.64907000  |
| C  | -1.75272300 | 1.15510200  | 2.12264100  |
| C  | -3.40709100 | 2.21025400  | 0.53306900  |
| H  | -1.49950100 | 2.11617400  | 2.58474600  |
| H  | -2.57963800 | 0.72047200  | 2.69248300  |
| H  | -0.88777900 | 0.49127500  | 2.20790900  |
| H  | -4.24513500 | 1.73399900  | 1.05413000  |
| H  | -3.26968800 | 3.19570400  | 0.98818400  |
| H  | -3.68967400 | 2.34806400  | -0.51628500 |
| C  | -0.51786600 | 3.35882000  | 0.26250200  |
| C  | 0.26359900  | 4.13197200  | -0.81284900 |
| H  | 0.08430600  | 3.29038900  | 1.17861500  |
| H  | -1.39789300 | 3.95375300  | 0.53212600  |
| C  | 0.74293000  | 5.51086500  | -0.34001800 |
| H  | 1.12586000  | 3.54062900  | -1.14707200 |
| H  | -0.37743800 | 4.25670400  | -1.69792900 |
| C  | 1.50157900  | 6.28788400  | -1.42143500 |
| H  | -0.12127500 | 6.10108100  | -0.00300400 |
| H  | 1.38744300  | 5.38860500  | 0.54282700  |
| H  | 1.83525800  | 7.26504800  | -1.05379400 |
| H  | 2.38880500  | 5.73648800  | -1.75674300 |
| H  | 0.86980200  | 6.46073000  | -2.30135500 |
| O  | -2.37922700 | 0.05902200  | 0.04429700  |
| Si | -3.65225900 | -1.08967100 | 0.13042500  |
| C  | -4.27031400 | -1.37570600 | 1.91556500  |
| H  | -5.03865300 | -2.15823000 | 1.92212900  |
| H  | -3.46233400 | -1.69603800 | 2.58158200  |
| H  | -4.72281900 | -0.47406200 | 2.34344100  |
| C  | -5.12991200 | -0.52738200 | -0.94155100 |
| H  | -5.64678200 | 0.33524900  | -0.50772600 |
| H  | -4.80454300 | -0.24943600 | -1.94984600 |
| H  | -5.86425500 | -1.33602900 | -1.03864700 |
| C  | -2.86237700 | -2.70089400 | -0.59470800 |
| C  | -3.89129900 | -3.84984600 | -0.53610200 |
| H  | -4.80318000 | -3.62194800 | -1.10271400 |
| H  | -3.45961800 | -4.76304400 | -0.96995000 |
| H  | -4.18475300 | -4.08811400 | 0.49379900  |
| C  | -1.61402000 | -3.09814700 | 0.22006800  |
| H  | -1.19838700 | -4.03938400 | -0.16821400 |
| H  | -0.82369600 | -2.34275700 | 0.16123700  |
| H  | -1.85135600 | -3.26201800 | 1.27921300  |
| C  | -2.45256600 | -2.46517400 | -2.06297000 |

|   |             |             |             |
|---|-------------|-------------|-------------|
| H | -1.97515200 | -3.36736300 | -2.47159400 |
| H | -3.31753700 | -2.23647400 | -2.69823200 |
| H | -1.73688300 | -1.64111800 | -2.15508500 |

**P3**

|   |             |             |             |
|---|-------------|-------------|-------------|
| C | -1.24091500 | -0.02823900 | -0.19172100 |
| C | -3.22518500 | -0.75231100 | 0.21441800  |
| C | -3.37026400 | 0.61999200  | -0.11292600 |
| C | -4.35907700 | -1.51359200 | 0.53387900  |
| C | -4.61378100 | 1.25567000  | -0.13956200 |
| C | -5.59998200 | -0.88528800 | 0.51314400  |
| H | -4.25548100 | -2.56431400 | 0.78721400  |
| C | -5.72611000 | 0.47922300  | 0.18104600  |
| H | -4.72203000 | 2.30433000  | -0.40245100 |
| H | -6.49328100 | -1.45446600 | 0.75572300  |
| H | -6.71203100 | 0.93580900  | 0.17107100  |
| C | -1.72737700 | 2.41773500  | -0.75905600 |
| H | -1.68366000 | 2.52259800  | -1.85032400 |
| H | -2.47524000 | 3.11357800  | -0.37047800 |
| H | -0.75963100 | 2.69632100  | -0.33594600 |
| N | -1.89987900 | -1.12187700 | 0.15660400  |
| C | 0.19453700  | 0.05542500  | -0.39090100 |
| C | 1.00629700  | -1.01225800 | -0.19784000 |
| H | 0.59393900  | 1.01269500  | -0.70869300 |
| C | 2.45562100  | -1.05600000 | -0.35699300 |
| H | 0.50217500  | -1.91661000 | 0.12510200  |
| N | -2.08342400 | 1.06989300  | -0.35803000 |
| C | 3.15584100  | -2.20030000 | -0.10609400 |
| C | 2.54001200  | -3.52473300 | 0.28420800  |
| C | 4.66292900  | -2.28617800 | -0.18192400 |
| H | 1.45859000  | -3.57890800 | 0.15980700  |
| H | 2.98234600  | -4.33061300 | -0.31722300 |
| H | 2.77049300  | -3.76278100 | 1.33273800  |
| H | 5.05448700  | -2.79281500 | 0.71073800  |
| H | 4.97441400  | -2.89923500 | -1.04085700 |
| H | 5.16442200  | -1.32056500 | -0.25836100 |
| C | 3.14981900  | 0.23473900  | -0.77052700 |
| C | 3.48199900  | 1.16791200  | 0.41170000  |
| H | 2.51132500  | 0.77313600  | -1.48217100 |
| H | 4.06881000  | 0.01774000  | -1.32393600 |
| C | 4.11125700  | 2.49670100  | -0.02625600 |
| H | 2.56799900  | 1.36433600  | 0.98833400  |
| H | 4.16469700  | 0.64777300  | 1.09831200  |
| C | 4.45409000  | 3.41820500  | 1.14932100  |
| H | 5.02096700  | 2.29330700  | -0.60951600 |
| H | 3.42424100  | 3.01580600  | -0.71050600 |
| H | 4.90000200  | 4.35827100  | 0.80457200  |
| H | 3.55875900  | 3.66745500  | 1.73219100  |
| H | 5.16854700  | 2.94082700  | 1.83115300  |

Cartesian coordinates for the stationary points given in Fig. S1.

**Z14**

|   |             |             |             |
|---|-------------|-------------|-------------|
| C | 1.08175900  | 1.15886700  | -0.53087400 |
| C | 1.72769600  | 2.23173200  | -2.47546000 |
| C | 1.41840200  | 3.19566600  | -1.57187600 |
| N | 1.02690400  | 2.54042900  | -0.39280400 |
| N | 1.52381700  | 0.99666800  | -1.83801200 |
| C | 0.73132300  | 3.25589800  | 0.83313000  |
| C | -0.59388000 | 3.67650100  | 1.09058100  |
| C | 1.79975100  | 3.55701800  | 1.70884500  |
| C | -0.82599900 | 4.41375000  | 2.26296400  |
| C | 1.51063300  | 4.29423300  | 2.86830200  |
| C | 0.21192300  | 4.71956600  | 3.14434400  |
| H | -1.83111400 | 4.74977600  | 2.48907100  |
| H | 2.31227400  | 4.53773400  | 3.55801300  |
| H | 0.00743400  | 5.29046900  | 4.04490600  |
| C | 1.87764600  | -0.26605100 | -2.45476700 |
| C | 3.20383700  | -0.73471300 | -2.30505400 |
| C | 0.91695700  | -0.95842400 | -3.22900000 |
| C | 3.55461700  | -1.93018500 | -2.95260100 |
| C | 1.32328200  | -2.14694900 | -3.85751500 |

|    |             |             |             |
|----|-------------|-------------|-------------|
| C  | 2.62606000  | -2.62956700 | -3.72313200 |
| H  | 4.56566500  | -2.31134200 | -2.85389200 |
| H  | 0.61049000  | -2.69994300 | -4.45767400 |
| H  | 2.91647300  | -3.55040200 | -4.21917900 |
| C  | 3.24298400  | 3.13804800  | 1.42647800  |
| H  | 3.24549000  | 2.51555000  | 0.52683200  |
| C  | 4.13519600  | 4.37036800  | 1.14306900  |
| H  | 3.75140400  | 4.95383600  | 0.29835800  |
| H  | 4.18262100  | 5.03368600  | 2.01492200  |
| H  | 5.15777300  | 4.05450400  | 0.90414100  |
| C  | 3.83116600  | 2.28143600  | 2.57031300  |
| H  | 3.88028600  | 2.84279800  | 3.51082900  |
| H  | 3.22457200  | 1.38574600  | 2.73678100  |
| H  | 4.85020600  | 1.96391500  | 2.31844900  |
| C  | 4.25782500  | 0.01244800  | -1.48716100 |
| H  | 3.79453600  | 0.91634800  | -1.08073100 |
| C  | 4.74495400  | -0.82805200 | -0.28430700 |
| H  | 5.47594600  | -0.25988300 | 0.30378200  |
| H  | 3.90838000  | -1.09200700 | 0.37126700  |
| H  | 5.22820300  | -1.75585500 | -0.61325700 |
| C  | 5.44681900  | 0.45998200  | -2.36975500 |
| H  | 5.97798800  | -0.40129900 | -2.79193700 |
| H  | 5.11063800  | 1.08839200  | -3.20238400 |
| H  | 6.16488100  | 1.03616500  | -1.77421200 |
| C  | -0.50503800 | -0.43218200 | -3.42483100 |
| H  | -0.75158200 | 0.21062400  | -2.57291400 |
| C  | -1.56183000 | -1.55650700 | -3.46738200 |
| H  | -1.48846500 | -2.15113300 | -4.38615400 |
| H  | -1.45897400 | -2.23493100 | -2.61295900 |
| H  | -2.56056900 | -1.11342500 | -3.42808800 |
| C  | -0.60619800 | 0.43484700  | -4.70533200 |
| H  | 0.08311000  | 1.28538600  | -4.67467700 |
| H  | -0.37179100 | -0.16099500 | -5.59634900 |
| H  | -1.62399300 | 0.82687400  | -4.81119600 |
| C  | -1.74193900 | 3.38633200  | 0.12383000  |
| H  | -1.47508100 | 2.50131500  | -0.46341200 |
| C  | -3.06988700 | 3.06976600  | 0.84354800  |
| H  | -2.94110200 | 2.27470000  | 1.58614500  |
| H  | -3.47919300 | 3.95046000  | 1.35318600  |
| H  | -3.80928400 | 2.73379600  | 0.11091100  |
| C  | -1.94578900 | 4.56139300  | -0.86595700 |
| H  | -2.21719100 | 5.47875300  | -0.32869100 |
| H  | -1.03931800 | 4.76416000  | -1.44632000 |
| H  | -2.75206500 | 4.32339100  | -1.56902200 |
| Ni | 0.65191700  | -0.16067200 | 0.79852200  |
| C  | -5.25872900 | -0.66313600 | -0.23589200 |
| C  | -4.97403000 | 0.17019500  | -1.34681200 |
| C  | -6.02117200 | 0.62994900  | -2.15606400 |
| C  | -7.31854900 | 0.24449000  | -1.83162900 |
| C  | -7.58326900 | -0.58508400 | -0.72247000 |
| C  | -6.55839000 | -1.05434500 | 0.09617800  |
| C  | -3.09607000 | -0.27125000 | -0.42856200 |
| H  | -5.81325300 | 1.26835800  | -3.00969700 |
| H  | -8.14820100 | 0.58795500  | -2.44357700 |
| H  | -8.60970900 | -0.86449700 | -0.50105900 |
| H  | -6.76664800 | -1.69325000 | 0.94969100  |
| H  | -2.04122400 | -0.31719800 | -0.17430800 |
| N  | -3.60598400 | 0.39683300  | -1.43732800 |
| N  | -4.02646100 | -0.93186300 | 0.33662100  |
| C  | -3.75969300 | -1.74778800 | 1.50655900  |
| H  | -4.25862600 | -1.33241900 | 2.38961700  |
| H  | -4.11349400 | -2.77294500 | 1.35074400  |
| H  | -2.68181300 | -1.77051600 | 1.68433900  |
| H  | 1.44482900  | 4.26861100  | -1.64476100 |
| H  | 2.07727600  | 2.29781600  | -3.49064200 |
| C  | 0.23036200  | -1.40408500 | 2.17242100  |
| C  | 0.23045000  | -0.09858200 | 2.67002000  |
| C  | 0.11522600  | -2.72241500 | 2.36844200  |
| C  | -0.18314400 | -3.35544200 | 3.75305300  |
| C  | -1.58745200 | -4.00874000 | 3.74501300  |
| H  | -1.69698700 | -4.74458100 | 2.94079500  |
| H  | -1.77553900 | -4.52753500 | 4.69413800  |
| H  | -2.37000500 | -3.25153300 | 3.62017900  |
| C  | -0.15011900 | -2.31668200 | 4.88787000  |
| H  | 0.83242400  | -1.83943700 | 4.96435200  |
| H  | -0.89183000 | -1.52670000 | 4.73594900  |
| H  | -0.36615800 | -2.80437300 | 5.84694400  |
| C  | 0.86214600  | -4.44819500 | 4.08229300  |
| H  | 0.64920100  | -4.89114500 | 5.06381900  |
| H  | 0.85706000  | -5.26084500 | 3.34829400  |

|   |             |             |             |
|---|-------------|-------------|-------------|
| H | 1.87343700  | -4.02703800 | 4.11550000  |
| C | 0.29216200  | -3.67481900 | 1.18449100  |
| H | -0.21680800 | -4.62795500 | 1.38190300  |
| H | -0.20112600 | -3.24485300 | 0.30254500  |
| C | 1.75706400  | -3.97464300 | 0.80609700  |
| H | 2.30014300  | -4.35179200 | 1.68252800  |
| H | 2.24439200  | -3.03165900 | 0.52443500  |
| C | 1.88524600  | -4.98593300 | -0.34104300 |
| H | 1.35906500  | -5.91258500 | -0.06805500 |
| H | 1.37286800  | -4.59293900 | -1.23058200 |
| C | 3.33938700  | -5.31533700 | -0.69527300 |
| H | 3.87167800  | -5.73636400 | 0.16699200  |
| H | 3.39946300  | -6.04483200 | -1.51202900 |
| H | 3.87948300  | -4.41478400 | -1.01135400 |
| H | -0.70396300 | 0.43976000  | 2.85740100  |
| H | 1.08161600  | 0.29618100  | 3.23284200  |

## ZTS<sub>14-15</sub>

|   |             |             |             |
|---|-------------|-------------|-------------|
| C | -1.17338700 | 1.05477900  | 0.28702200  |
| C | -2.70914300 | 2.21765200  | 1.56411900  |
| C | -2.10106300 | 3.11948400  | 0.75720400  |
| N | -1.16010000 | 2.41056200  | -0.01081800 |
| N | -2.15297700 | 0.96173400  | 1.26768400  |
| C | -0.31673000 | 3.07290100  | -0.98345300 |
| C | 0.76766700  | 3.85673500  | -0.52073000 |
| C | -0.65006000 | 2.98678000  | -2.35559300 |
| C | 1.53130800  | 4.54440200  | -1.47830900 |
| C | 0.14981800  | 3.69197000  | -3.26949500 |
| C | 1.23069000  | 4.46195900  | -2.83853400 |
| H | 2.36764100  | 5.15246300  | -1.15221400 |
| H | -0.08543600 | 3.64682500  | -4.32733500 |
| H | 1.83265200  | 5.00470000  | -3.56094600 |
| C | -2.64601300 | -0.25685100 | 1.88140700  |
| C | -3.89931400 | -0.75999100 | 1.45620400  |
| C | -1.89721300 | -0.87026400 | 2.91413300  |
| C | -4.39287700 | -1.91136500 | 2.09090500  |
| C | -2.43570400 | -2.02540100 | 3.50465500  |
| C | -3.66767700 | -2.54168300 | 3.10091800  |
| H | -5.35135400 | -2.31808700 | 1.78687500  |
| H | -1.88376400 | -2.52465000 | 4.29135900  |
| H | -4.06262900 | -3.43415900 | 3.57652600  |
| C | -1.87909500 | 2.22676200  | -2.85737300 |
| H | -2.23904600 | 1.59054500  | -2.04400000 |
| C | -3.01592300 | 3.21429600  | -3.21984200 |
| H | -3.29058700 | 3.83706600  | -2.36092600 |
| H | -2.71177100 | 3.88116700  | -4.03579800 |
| H | -3.90896200 | 2.66663900  | -3.54429900 |
| C | -1.55907800 | 1.29879800  | -4.04962500 |
| H | -1.24734900 | 1.86394000  | -4.93582500 |
| H | -0.76161700 | 0.59215700  | -3.79674500 |
| H | -2.45005000 | 0.72235400  | -4.32523300 |
| C | -4.74153200 | -0.08318200 | 0.37002500  |
| H | -4.11054200 | 0.65256300  | -0.13964900 |
| C | -5.24549900 | -1.07335300 | -0.70509900 |
| H | -5.77702200 | -0.52648800 | -1.49307100 |
| H | -4.41836700 | -1.62027000 | -1.16657600 |
| H | -5.94533200 | -1.80540700 | -0.28595500 |
| C | -5.94279500 | 0.67228100  | 0.99230900  |
| H | -6.61426300 | -0.02496100 | 1.50777400  |
| H | -5.61825600 | 1.42207800  | 1.72170700  |
| H | -6.51915800 | 1.18389500  | 0.21221500  |
| C | -0.58006700 | -0.27994300 | 3.42189400  |
| H | -0.05411200 | 0.16950900  | 2.57410600  |
| C | 0.38055700  | -1.33376600 | 4.00590000  |
| H | 0.01739900  | -1.74410500 | 4.95703800  |
| H | 0.54079400  | -2.15649100 | 3.30267400  |
| H | 1.35371000  | -0.86891200 | 4.18777500  |
| C | -0.85237200 | 0.83119000  | 4.46890200  |
| H | -1.46879700 | 1.63800900  | 4.05751900  |
| H | -1.37061900 | 0.42044100  | 5.34481200  |
| H | 0.09477500  | 1.26778500  | 4.80719600  |
| C | 1.09166400  | 4.02211400  | 0.96604000  |
| H | 0.56238400  | 3.23727600  | 1.51622400  |
| C | 2.59602600  | 3.86254900  | 1.27515900  |
| H | 2.98773200  | 2.91480700  | 0.90014100  |
| H | 3.18831300  | 4.67628900  | 0.83940700  |
| H | 2.75471400  | 3.88717800  | 2.35924000  |
| C | 0.59283300  | 5.39435800  | 1.48716100  |

|    |             |             |             |
|----|-------------|-------------|-------------|
| H  | 1.10770200  | 6.21410600  | 0.97128500  |
| H  | -0.48340000 | 5.52744800  | 1.33404100  |
| H  | 0.79695800  | 5.48843600  | 2.56013000  |
| Ni | -0.14338300 | -0.38238900 | -0.42201100 |
| C  | 3.87936900  | 0.60375300  | -0.07309400 |
| C  | 3.55252100  | 0.18594500  | 1.24237200  |
| C  | 4.53211200  | 0.22927900  | 2.24413200  |
| C  | 5.80433100  | 0.68585700  | 1.90594700  |
| C  | 6.11067000  | 1.09940100  | 0.59430600  |
| C  | 5.15140500  | 1.06818000  | -0.41821100 |
| C  | 1.73241000  | -0.04358700 | 0.07566100  |
| H  | 4.29502200  | -0.08988300 | 3.25527000  |
| H  | 6.57927900  | 0.72522000  | 2.66716700  |
| H  | 7.11384900  | 1.45010000  | 0.36639200  |
| H  | 5.39026200  | 1.39153300  | -1.42791200 |
| H  | 1.05513500  | -1.23062400 | -0.59992800 |
| N  | 2.23028900  | -0.21864600 | 1.29619200  |
| N  | 2.71476600  | 0.43984200  | -0.79810700 |
| C  | 2.55162000  | 0.72885500  | -2.20754100 |
| H  | 2.61604200  | 1.80496000  | -2.40416200 |
| H  | 3.31867100  | 0.21141800  | -2.79660000 |
| H  | 1.56651300  | 0.37684600  | -2.52099600 |
| H  | -2.23776600 | 4.18059000  | 0.65166400  |
| H  | -3.47491200 | 2.33750400  | 2.30938200  |
| C  | -0.25277100 | -2.13611000 | -1.36340100 |
| C  | -1.51059300 | -1.52241200 | -1.27884300 |
| C  | 0.42911700  | -3.22878200 | -1.73156600 |
| C  | -0.33794000 | -4.40102300 | -2.42072900 |
| C  | 0.60776700  | -5.50151300 | -2.94827000 |
| H  | 1.21216600  | -5.95155600 | -2.15390400 |
| H  | 0.01182000  | -6.30365300 | -3.39989800 |
| H  | 1.28637500  | -5.12348800 | -3.72159000 |
| C  | -1.14827300 | -3.87816100 | -3.62740000 |
| H  | -1.88270100 | -3.12768700 | -3.32415400 |
| H  | -0.48752700 | -3.42319800 | -4.37525700 |
| H  | -1.68709100 | -4.70369100 | -4.11026800 |
| C  | -1.30550300 | -5.04609300 | -1.40106200 |
| H  | -1.87063400 | -5.86268200 | -1.86970600 |
| H  | -0.76058000 | -5.46030200 | -0.54524100 |
| H  | -2.02213200 | -4.31228000 | -1.02006200 |
| C  | 1.90955300  | -3.38831300 | -1.41709100 |
| H  | 2.41795100  | -3.93716300 | -2.21759400 |
| H  | 2.38410400  | -2.40049300 | -1.38680600 |
| C  | 2.19049500  | -4.08873800 | -0.06988300 |
| H  | 1.72059700  | -5.08255400 | -0.05869600 |
| H  | 1.71171000  | -3.50904900 | 0.73025500  |
| C  | 3.68869900  | -4.22990200 | 0.22872500  |
| H  | 4.17200600  | -4.79223400 | -0.58381200 |
| H  | 4.14967500  | -3.23260300 | 0.23191500  |
| C  | 3.96949400  | -4.92230000 | 1.56673100  |
| H  | 3.54585500  | -5.93450300 | 1.58759600  |
| H  | 5.04617400  | -5.00740800 | 1.75459600  |
| H  | 3.52944800  | -4.36023500 | 2.39931100  |
| H  | -1.94490800 | -1.03450100 | -2.15292900 |
| H  | -2.24073500 | -1.89435000 | -0.56060200 |

## Z<sub>15</sub>

|   |             |             |             |
|---|-------------|-------------|-------------|
| C | -1.33193600 | 0.64411100  | -0.22012300 |
| C | -3.37519000 | 1.59066100  | 0.30351200  |
| C | -2.65490600 | 2.53814200  | -0.33831700 |
| N | -1.40807600 | 1.96514800  | -0.64476800 |
| N | -2.57427800 | 0.43732000  | 0.37048800  |
| C | -0.37912300 | 2.74881700  | -1.29903800 |
| C | 0.31757600  | 3.71797900  | -0.53731500 |
| C | -0.18261000 | 2.60370300  | -2.69266900 |
| C | 1.24827100  | 4.52834800  | -1.20898200 |
| C | 0.76886000  | 3.43168800  | -3.30948400 |
| C | 1.47947100  | 4.38363400  | -2.57690700 |
| H | 1.79388400  | 5.28181700  | -0.65175500 |
| H | 0.94162300  | 3.34243700  | -4.37607400 |
| H | 2.20454800  | 5.02003600  | -3.07480500 |
| C | -3.08908100 | -0.78007200 | 0.97608600  |
| C | -3.95488100 | -1.60043600 | 0.21122800  |
| C | -2.79968200 | -1.04938500 | 2.33617200  |
| C | -4.49740500 | -2.73717300 | 0.83262500  |
| C | -3.37207800 | -2.20044000 | 2.90301500  |
| C | -4.20461700 | -3.03882400 | 2.16193300  |
| H | -5.15906000 | -3.38714500 | 0.27132200  |

|   |             |             |             |
|---|-------------|-------------|-------------|
| H | -3.16229500 | -2.44230600 | 3.93763600  |
| H | -4.63241000 | -3.92323600 | 2.62404200  |
| C | -1.03543900 | 1.65677900  | -3.53816000 |
| H | -1.45074500 | 0.89585400  | -2.87170200 |
| C | -2.22084800 | 2.42491000  | -4.17562200 |
| H | -2.84505200 | 2.90152300  | -3.41180300 |
| H | -1.85800000 | 3.20744600  | -4.85315200 |
| H | -2.85332300 | 1.74035300  | -4.75376200 |
| C | -0.22778000 | 0.91590200  | -4.62490900 |
| H | 0.14015600  | 1.59762100  | -5.40068400 |
| H | 0.63385200  | 0.39457800  | -4.19486800 |
| H | -0.86372900 | 0.17304300  | -5.12011100 |
| C | -4.37114300 | -1.25536800 | -1.22246600 |
| H | -3.63550900 | -0.55103500 | -1.62568500 |
| C | -4.40689300 | -2.48189100 | -2.16253600 |
| H | -4.59304100 | -2.15318800 | -3.19179600 |
| H | -3.46431300 | -3.03549200 | -2.14755900 |
| H | -5.21336600 | -3.17339500 | -1.89273500 |
| C | -5.75822700 | -0.56160700 | -1.24013800 |
| H | -6.52762900 | -1.23377600 | -0.84153500 |
| H | -5.76792800 | 0.35314300  | -0.63982300 |
| H | -6.03806200 | -0.29558500 | -2.26663400 |
| C | -1.95321900 | -0.10603400 | 3.19510600  |
| H | -1.18632700 | 0.34271800  | 2.55634700  |
| C | -1.19324700 | -0.82243600 | 4.32898600  |
| H | -1.86862900 | -1.19172500 | 5.11143100  |
| H | -0.60024200 | -1.65575800 | 3.94472900  |
| H | -0.50036700 | -0.11532400 | 4.79603700  |
| C | -2.83114800 | 1.02484700  | 3.79233700  |
| H | -3.32337400 | 1.61987800  | 3.01635700  |
| H | -3.60828800 | 0.60768900  | 4.44544800  |
| H | -2.21139200 | 1.70164800  | 4.39261300  |
| C | 0.04690100  | 3.95180300  | 0.95147800  |
| H | -0.51353600 | 3.09201600  | 1.33281200  |
| C | 1.33797500  | 4.06002000  | 1.79113600  |
| H | 1.97711800  | 3.18424600  | 1.66350300  |
| H | 1.91845800  | 4.95413800  | 1.53267000  |
| H | 1.08085800  | 4.13419800  | 2.85380200  |
| C | -0.81825100 | 5.22191100  | 1.15782000  |
| H | -0.28518800 | 6.11382100  | 0.80636000  |
| H | -1.76958900 | 5.16737700  | 0.61801000  |
| H | -1.04029900 | 5.35853700  | 2.22264200  |
| N | 0.10075200  | -0.60095200 | -0.47865200 |
| C | 3.28299700  | 0.93761400  | 1.67272300  |
| C | 2.46059200  | 0.36392500  | 2.67259300  |
| C | 2.89060300  | 0.36980300  | 4.00546200  |
| C | 4.12502100  | 0.94796200  | 4.30264100  |
| C | 4.92780600  | 1.51726900  | 3.29663200  |
| C | 4.51787000  | 1.52281600  | 1.96142700  |
| C | 1.37850300  | 0.10207100  | 0.78738200  |
| H | 2.27314100  | -0.07239700 | 4.78279700  |
| H | 4.47733400  | 0.95948500  | 5.33115400  |
| H | 5.88538400  | 1.95805100  | 3.56202500  |
| H | 5.14129400  | 1.96165500  | 1.18639300  |
| H | 0.97005900  | -1.51783000 | -2.75843700 |
| N | 1.29972200  | -0.12999300 | 2.09682500  |
| N | 2.57735400  | 0.76991800  | 0.49278800  |
| C | 3.02530000  | 1.25475900  | -0.79359100 |
| H | 3.19065000  | 2.33786900  | -0.76655400 |
| H | 3.95944300  | 0.76679800  | -1.09904400 |
| H | 2.25267000  | 1.04428100  | -1.53461500 |
| H | -2.89202000 | 3.55268300  | -0.60239900 |
| H | -4.36541300 | 1.61527000  | 0.72081300  |
| C | 0.49809900  | -1.99804400 | -1.89787500 |
| C | -0.90021200 | -1.81912500 | -1.79785100 |
| C | 1.38214000  | -2.38748800 | -0.87208100 |
| C | 1.06306000  | -3.48188400 | 0.20175600  |
| C | 2.25428400  | -3.67565200 | 1.16905100  |
| H | 2.46377600  | -2.75394400 | 1.72117400  |
| H | 1.99963400  | -4.45192700 | 1.90017900  |
| H | 3.16949300  | -3.99771000 | 0.66366800  |
| C | 0.78205300  | -4.82013200 | -0.52977500 |
| H | -0.08552200 | -4.73061100 | -1.19267400 |
| H | 1.63317800  | -5.14735000 | -1.13495200 |
| H | 0.56850400  | -5.60974600 | 0.20234900  |
| C | -0.15351300 | -3.16643800 | 1.10216200  |
| H | -0.22955900 | -3.94027000 | 1.87755400  |
| H | -0.02910400 | -2.20305300 | 1.60384900  |
| H | -1.10367000 | -3.17032500 | 0.56547200  |
| C | 2.85686400  | -2.15626600 | -1.21746600 |

|   |             |             |             |
|---|-------------|-------------|-------------|
| H | 2.92162000  | -1.24088600 | -1.81423800 |
| H | 3.43531100  | -1.95856900 | -0.30937300 |
| C | 3.54973900  | -3.27154100 | -2.03039200 |
| H | 2.95355400  | -3.48858900 | -2.92898700 |
| H | 3.58858300  | -4.20576800 | -1.45694200 |
| C | 4.97715000  | -2.88913500 | -2.44788200 |
| H | 4.94695600  | -1.95820100 | -3.03273800 |
| H | 5.56819600  | -2.66402600 | -1.54872400 |
| C | 5.68109900  | -3.98009300 | -3.26188500 |
| H | 5.13071800  | -4.20422000 | -4.18425500 |
| H | 6.69599400  | -3.67717000 | -3.54469400 |
| H | 5.75949900  | -4.91276900 | -2.68965600 |
| H | -1.41194800 | -1.40514800 | -2.66265100 |
| H | -1.51551200 | -2.46186600 | -1.17962800 |

## ZTS<sub>15-16</sub>

|   |             |             |             |
|---|-------------|-------------|-------------|
| C | 1.13601200  | -0.91073500 | 0.15636200  |
| C | 2.76068000  | -1.69590700 | 1.57169200  |
| C | 2.05562800  | -2.76935300 | 1.13437900  |
| N | 1.05313400  | -2.28460200 | 0.27805200  |
| N | 2.19638300  | -0.56130100 | 0.97049500  |
| C | 0.13676700  | -3.16535600 | -0.42283900 |
| C | -0.98963700 | -3.67638900 | 0.26690100  |
| C | 0.44359200  | -3.53919600 | -1.75210900 |
| C | -1.82715300 | -4.56275100 | -0.42994700 |
| C | -0.43262800 | -4.42522500 | -2.40009300 |
| C | -1.55806700 | -4.92964500 | -1.74950300 |
| H | -2.70001200 | -4.96768300 | 0.06805300  |
| H | -0.22249100 | -4.72897800 | -3.41984600 |
| H | -2.22135600 | -5.61613200 | -2.26653200 |
| C | 2.76696300  | 0.76757400  | 1.11990800  |
| C | 3.84892900  | 1.12481400  | 0.28087800  |
| C | 2.27509700  | 1.62236000  | 2.13320700  |
| C | 4.42841400  | 2.38915800  | 0.46964400  |
| C | 2.89462900  | 2.87475600  | 2.27534100  |
| C | 3.95529700  | 3.25698200  | 1.45342500  |
| H | 5.25798400  | 2.69368800  | -0.15898600 |
| H | 2.53960900  | 3.55811300  | 3.03737900  |
| H | 4.41524500  | 4.23179300  | 1.58202600  |
| C | 1.71169900  | -3.07744200 | -2.47309300 |
| H | 2.17908500  | -2.28936700 | -1.87484900 |
| C | 2.72719300  | -4.24189700 | -2.58289500 |
| H | 2.98231700  | -4.64416200 | -1.59581700 |
| H | 2.32027000  | -5.06270800 | -3.18543600 |
| H | 3.65147800  | -3.89696400 | -3.06130200 |
| C | 1.41858300  | -2.47273000 | -3.86391600 |
| H | 0.98139200  | -3.21184900 | -4.54529800 |
| H | 0.73302400  | -1.62316300 | -3.78699700 |
| H | 2.34937900  | -2.11410800 | -4.31844500 |
| C | 4.43353300  | 0.17599800  | -0.76828800 |
| H | 3.74762800  | -0.66995200 | -0.88456000 |
| C | 4.57553200  | 0.83701600  | -2.15763900 |
| H | 4.94001600  | 0.10107200  | -2.88439300 |
| H | 3.61600900  | 1.22366500  | -2.51205100 |
| H | 5.29389300  | 1.66480300  | -2.14045500 |
| C | 5.79558700  | -0.39056600 | -0.29519900 |
| H | 6.52935200  | 0.41435500  | -0.16893800 |
| H | 5.70422900  | -0.91373300 | 0.66345400  |
| H | 6.19233500  | -1.09770300 | -1.03339900 |
| C | 1.15893000  | 1.19663300  | 3.08765700  |
| H | 0.54192000  | 0.44989100  | 2.57993100  |
| C | 0.20490300  | 2.35122000  | 3.45425800  |
| H | 0.69403900  | 3.11733000  | 4.06876900  |
| H | -0.20141800 | 2.82226300  | 2.55518500  |
| H | -0.63724400 | 1.95460600  | 4.03178400  |
| C | 1.75578000  | 0.56112800  | 4.36904700  |
| H | 2.37394100  | -0.31453200 | 4.13991500  |
| H | 2.38119200  | 1.28348600  | 4.90850600  |
| H | 0.95130900  | 0.23943700  | 5.04121700  |
| C | -1.28510000 | -3.33710400 | 1.73028200  |
| H | -0.81357700 | -2.37365500 | 1.95286000  |
| C | -2.79424100 | -3.18691800 | 2.02390300  |
| H | -3.28092500 | -2.50729400 | 1.32072900  |
| H | -3.31143800 | -4.15388100 | 1.98874300  |
| H | -2.93363000 | -2.77898200 | 3.03063200  |
| C | -0.68640900 | -4.40769100 | 2.67957200  |
| H | -1.13390300 | -5.38925200 | 2.48079800  |
| H | 0.39798200  | -4.50378300 | 2.56907600  |

|    |             |             |             |
|----|-------------|-------------|-------------|
| H  | -0.89616900 | -4.14412100 | 3.72284500  |
| Ni | 0.30888100  | 0.27863800  | -1.00770800 |
| C  | -3.50472600 | -0.11214900 | 0.09543500  |
| C  | -2.91500700 | 0.36378400  | 1.29170200  |
| C  | -3.72727700 | 0.67820600  | 2.38779100  |
| C  | -5.10423700 | 0.50525500  | 2.25906100  |
| C  | -5.67481800 | 0.02710600  | 1.06339500  |
| C  | -4.88358300 | -0.29138000 | -0.04190400 |
| C  | -1.28242400 | 0.03130000  | -0.08872800 |
| H  | -3.28628300 | 1.04800500  | 3.30918600  |
| H  | -5.75462400 | 0.74447500  | 3.09628500  |
| H  | -6.75255500 | -0.09621300 | 0.99877900  |
| H  | -5.32658800 | -0.66102000 | -0.96260000 |
| H  | -1.24351300 | 1.52046000  | -3.49020700 |
| N  | -1.53548200 | 0.41853400  | 1.14681700  |
| N  | -2.44432300 | -0.32914000 | -0.76975700 |
| C  | -2.56226200 | -0.85486200 | -2.11551100 |
| H  | -2.94767200 | -1.88113200 | -2.09779900 |
| H  | -3.23250300 | -0.22940700 | -2.71561300 |
| H  | -1.57506500 | -0.85806600 | -2.57977100 |
| H  | 2.17009500  | -3.81943600 | 1.33292700  |
| H  | 3.60394900  | -1.62310400 | 2.23502900  |
| C  | -0.54806700 | 2.16573400  | -2.94469700 |
| C  | 0.71643500  | 1.46106400  | -2.60431900 |
| C  | -1.03312300 | 3.41311000  | -2.70305500 |
| C  | -0.22835100 | 4.54259500  | -2.01032600 |
| C  | -1.01896800 | 5.86626600  | -1.89126000 |
| H  | -1.94680000 | 5.75014600  | -1.32228000 |
| H  | -0.40445900 | 6.60859200  | -1.36679600 |
| H  | -1.27016100 | 6.28764800  | -2.87103200 |
| C  | 1.03785800  | 4.87264200  | -2.84189300 |
| H  | 1.69158400  | 4.00643800  | -2.96455700 |
| H  | 0.75788000  | 5.22039100  | -3.84350800 |
| H  | 1.61843700  | 5.67012800  | -2.35823700 |
| C  | 0.17389600  | 4.12807700  | -0.57530300 |
| H  | 0.78050800  | 4.91205700  | -0.10140900 |
| H  | -0.71764300 | 3.96973200  | 0.04305400  |
| H  | 0.75154600  | 3.20080800  | -0.55811200 |
| C  | -2.45880500 | 3.68892500  | -3.17157400 |
| H  | -2.55563400 | 4.70368300  | -3.57843800 |
| H  | -2.69116600 | 3.01422600  | -4.00763800 |
| C  | -3.55020600 | 3.48752800  | -2.09646600 |
| H  | -3.35168400 | 4.13241200  | -1.22971900 |
| H  | -3.48891500 | 2.45740200  | -1.71957700 |
| C  | -4.96866500 | 3.76349400  | -2.61380700 |
| H  | -5.01822100 | 4.78831700  | -3.01006500 |
| H  | -5.17828200 | 3.10062200  | -3.46665100 |
| C  | -6.04996400 | 3.57709300  | -1.54333700 |
| H  | -5.89636700 | 4.26725700  | -0.70441200 |
| H  | -7.05268000 | 3.76239800  | -1.94759700 |
| H  | -6.03246600 | 2.55957800  | -1.13465900 |
| H  | 1.04530200  | 0.84636800  | -3.45356900 |
| H  | 1.53448300  | 2.13001200  | -2.32361300 |

## Z16

|   |             |             |             |
|---|-------------|-------------|-------------|
| C | -1.89212200 | 0.52488400  | 0.41702000  |
| C | -3.96147200 | 0.27382000  | 1.39864400  |
| C | -4.08783400 | 1.23055600  | 0.44203200  |
| N | -2.82576500 | 1.37626300  | -0.14893300 |
| N | -2.62413400 | -0.15171900 | 1.37455500  |
| C | -2.54349600 | 2.31725700  | -1.21534300 |
| C | -2.76855300 | 1.91971600  | -2.55265900 |
| C | -2.08581100 | 3.61215200  | -0.87464100 |
| C | -2.50179500 | 2.86030100  | -3.56099400 |
| C | -1.83651600 | 4.51128400  | -1.92298200 |
| C | -2.03701000 | 4.13875100  | -3.25305700 |
| H | -2.66030500 | 2.58437800  | -4.59748500 |
| H | -1.48484400 | 5.51163200  | -1.69610000 |
| H | -1.83513100 | 4.84799500  | -4.04964300 |
| C | -2.10509900 | -1.15205100 | 2.28565200  |
| C | -1.47228800 | -0.72398700 | 3.47399800  |
| C | -2.29443900 | -2.51981800 | 1.97844800  |
| C | -1.01240000 | -1.71006500 | 4.36180700  |
| C | -1.82135300 | -3.46313000 | 2.90467700  |
| C | -1.18494000 | -3.06565700 | 4.08227800  |
| H | -0.52040000 | -1.40968800 | 5.28109400  |
| H | -1.95004000 | -4.51934400 | 2.69857600  |
| H | -0.82650500 | -3.81374000 | 4.78259500  |
| C | -1.91911000 | 4.06710000  | 0.57723500  |

|    |             |             |             |
|----|-------------|-------------|-------------|
| H  | -1.91233700 | 3.17462300  | 1.21306700  |
| C  | -3.12031300 | 4.94140300  | 1.01656700  |
| H  | -4.06778400 | 4.40052300  | 0.91480300  |
| H  | -3.18332100 | 5.84925400  | 0.40474000  |
| H  | -3.01123900 | 5.24424800  | 2.06483700  |
| C  | -0.58933200 | 4.81347800  | 0.82410400  |
| H  | -0.55573400 | 5.77063100  | 0.29150200  |
| H  | 0.27033500  | 4.21713800  | 0.50033600  |
| H  | -0.47453600 | 5.02896500  | 1.89285700  |
| C  | -1.30037300 | 0.75249600  | 3.83367700  |
| H  | -1.69679700 | 1.35191900  | 3.00785900  |
| C  | 0.18828700  | 1.13397400  | 4.00097900  |
| H  | 0.28367100  | 2.20371300  | 4.22268000  |
| H  | 0.75262400  | 0.92224600  | 3.08601300  |
| H  | 0.65447500  | 0.57942200  | 4.82383500  |
| C  | -2.11091500 | 1.11779900  | 5.10029500  |
| H  | -1.75186000 | 0.56452400  | 5.97615000  |
| H  | -3.17465000 | 0.88784300  | 4.97123900  |
| H  | -2.01611000 | 2.18831300  | 5.31741700  |
| C  | -3.02449900 | -2.98007100 | 0.71468300  |
| H  | -2.98682100 | -2.15915800 | -0.00984700 |
| C  | -2.36375000 | -4.20508500 | 0.04702900  |
| H  | -2.47145400 | -5.10912400 | 0.65891900  |
| H  | -1.30063700 | -4.03963400 | -0.14239000 |
| H  | -2.84658300 | -4.40402300 | -0.91599800 |
| C  | -4.51325100 | -3.28654300 | 1.02018100  |
| H  | -5.03784200 | -2.41660300 | 1.42951700  |
| H  | -4.59683700 | -4.10345100 | 1.74746800  |
| H  | -5.03118000 | -3.59395800 | 0.10412900  |
| C  | -3.33930600 | 0.54972800  | -2.92180400 |
| H  | -3.31197700 | -0.08181200 | -2.02795100 |
| C  | -2.50582000 | -0.17393900 | -4.00178500 |
| H  | -1.49830700 | -0.38488400 | -3.63188600 |
| H  | -2.44534500 | 0.40765000  | -4.92965200 |
| H  | -2.97891100 | -1.13337200 | -4.24479900 |
| C  | -4.81967800 | 0.68658200  | -3.35942900 |
| H  | -4.90567700 | 1.29414000  | -4.26859600 |
| H  | -5.43128700 | 1.15985600  | -2.58170800 |
| H  | -5.24351300 | -0.30161400 | -3.57296100 |
| Ni | 0.00766500  | 0.51523400  | -0.07084000 |
| C  | 1.16057200  | -3.25352800 | -0.98093600 |
| C  | 0.42724200  | -2.84624200 | -2.12343500 |
| C  | 0.28459300  | -3.72693700 | -3.20191900 |
| C  | 0.87572700  | -4.98754200 | -3.11066500 |
| C  | 1.59832100  | -5.37699600 | -1.96774000 |
| C  | 1.75115100  | -4.51453600 | -0.87938000 |
| C  | 0.36340000  | -1.17312900 | -0.74139500 |
| H  | -0.27264200 | -3.42626800 | -4.08496000 |
| H  | 0.77873900  | -5.68506100 | -3.93894400 |
| H  | 2.04771400  | -6.36603800 | -1.93053800 |
| H  | 2.31024500  | -4.81746700 | 0.00215000  |
| H  | 2.92989500  | 0.98255000  | 1.25939500  |
| N  | -0.05110800 | -1.55649300 | -1.93877200 |
| N  | 1.10770900  | -2.17155900 | -0.11638700 |
| C  | 1.69527600  | -2.13938800 | 1.20449100  |
| H  | 2.77612800  | -2.31432400 | 1.15277300  |
| H  | 1.23937300  | -2.89640500 | 1.85456800  |
| H  | 1.52235900  | -1.15329600 | 1.63601000  |
| H  | -4.93748700 | 1.81032600  | 0.12690100  |
| H  | -4.67754000 | -0.13692300 | 2.08787500  |
| C  | 2.99523400  | 0.89256600  | 0.17143900  |
| C  | 1.72207600  | 1.20986900  | -0.50220100 |
| C  | 4.21306600  | 0.51197800  | -0.29061900 |
| C  | 4.57721200  | 0.34051900  | -1.78743000 |
| C  | 6.00011500  | -0.23033100 | -1.99243700 |
| H  | 6.77938400  | 0.40000700  | -1.55125600 |
| H  | 6.20697300  | -0.30114400 | -3.06673700 |
| H  | 6.09983800  | -1.23938400 | -1.57643000 |
| C  | 3.61316000  | -0.64930500 | -2.48524000 |
| H  | 2.57118400  | -0.32911700 | -2.45769800 |
| H  | 3.66235200  | -1.63657200 | -2.01236800 |
| H  | 3.89934400  | -0.76982800 | -3.53836500 |
| C  | 4.53027400  | 1.71662900  | -2.49960400 |
| H  | 4.76839100  | 1.60402300  | -3.56558500 |
| H  | 5.26104100  | 2.40809500  | -2.06321800 |
| H  | 3.54489100  | 2.18390000  | -2.42269400 |
| C  | 5.29783700  | 0.31567500  | 0.76387800  |
| H  | 5.95452500  | -0.52426800 | 0.50793800  |
| H  | 4.82265300  | 0.04501100  | 1.71600800  |
| C  | 6.16977700  | 1.56585300  | 1.01737100  |

|   |            |            |             |
|---|------------|------------|-------------|
| H | 6.64345800 | 1.89365000 | 0.08195100  |
| H | 5.51405300 | 2.39120100 | 1.32908600  |
| C | 7.25353600 | 1.33817900 | 2.07937100  |
| H | 7.90956200 | 0.51653000 | 1.75770800  |
| H | 6.78005800 | 1.00012800 | 3.01259400  |
| C | 8.09874300 | 2.58585000 | 2.35857900  |
| H | 8.61038800 | 2.92888100 | 1.45068300  |
| H | 8.86464200 | 2.39070800 | 3.11844900  |
| H | 7.47572500 | 3.41424000 | 2.71825000  |
| H | 1.78577500 | 1.36072600 | -1.58163200 |
| H | 1.28956600 | 2.14479300 | -0.04467300 |

|    |             |             |             |
|----|-------------|-------------|-------------|
| C  | -1.90727800 | 3.87136000  | -1.83505200 |
| H  | -3.21558300 | 3.59466700  | -0.15168000 |
| H  | -0.65577800 | 3.86779800  | 3.58060500  |
| H  | -1.83697800 | 4.94569400  | -1.69525400 |
| C  | -1.30826500 | -3.75749800 | -1.81312000 |
| C  | -0.22182000 | -4.31575000 | -2.52559600 |
| C  | -1.94472900 | -4.45401700 | -0.75853600 |
| C  | 0.21891000  | -5.59673200 | -2.15725500 |
| C  | -1.46821900 | -5.73344900 | -0.43116400 |
| C  | -0.39572900 | -6.30020600 | -1.12022000 |
| H  | 1.04768900  | -6.04973900 | -2.69098300 |
| H  | -1.94042900 | -6.28947500 | 0.37179400  |
| H  | -0.04068400 | -7.29056200 | -0.85142000 |
| C  | -0.62195200 | 1.22938100  | -4.30002900 |
| H  | -0.63727900 | 0.14643600  | -4.14603900 |
| C  | -1.39760600 | 1.53708200  | -5.60486800 |
| H  | -2.43476100 | 1.18785300  | -5.54540600 |
| H  | -1.41532500 | 2.61535100  | -5.80688300 |
| H  | -0.91966600 | 1.04075300  | -6.45795200 |
| C  | 0.85670600  | 1.65120200  | -4.42836300 |
| H  | 0.96434800  | 2.72449600  | -4.62474600 |
| H  | 1.40668800  | 1.41407600  | -3.51373700 |
| H  | 1.32520700  | 1.11480400  | -5.26247400 |
| C  | 0.42773200  | -3.58570700 | -3.70086500 |
| H  | 0.13637300  | -2.53365300 | -3.63447800 |
| C  | 1.96978700  | -3.62753500 | -3.64682100 |
| H  | 2.38728000  | -3.01322000 | -4.45418000 |
| H  | 2.33198400  | -3.23477800 | -2.69100000 |
| H  | 2.35976200  | -4.64476500 | -3.77350200 |
| C  | -0.08870600 | -4.14652800 | -5.04863200 |
| H  | 0.17252500  | -5.20649600 | -5.15870700 |
| H  | -1.17838500 | -4.05817100 | -5.12457800 |
| H  | 0.35616300  | -3.59795000 | -5.88817300 |
| C  | -3.14737900 | -3.87232900 | -0.01341500 |
| H  | -3.19833700 | -2.80440900 | -0.25019800 |
| C  | -3.01697700 | -3.99482300 | 1.52036800  |
| H  | -3.03192300 | -5.04125200 | 1.84855600  |
| H  | -2.08882700 | -3.53896700 | 1.87620400  |
| H  | -3.85820300 | -3.48713200 | 2.00795100  |
| C  | -4.46530300 | -4.52853200 | -0.49505800 |
| H  | -4.61193500 | -4.39280500 | -1.57218400 |
| H  | -4.46132300 | -5.60603200 | -0.28919000 |
| H  | -5.32533200 | -4.08724800 | 0.02346800  |
| C  | -3.71915600 | 0.89424300  | -0.21617300 |
| H  | -3.38963400 | -0.14882200 | -0.26685200 |
| C  | -3.67389000 | 1.32060600  | 1.26637500  |
| H  | -2.65826200 | 1.27182200  | 1.67383900  |
| H  | -4.05692600 | 2.33722100  | 1.41545700  |
| H  | -4.29775000 | 0.64594500  | 1.86367800  |
| C  | -5.17708900 | 0.96086400  | -0.73913000 |
| H  | -5.55027100 | 1.99233100  | -0.71816600 |
| H  | -5.25020400 | 0.59427300  | -1.76797200 |
| H  | -5.83514800 | 0.34699900  | -0.11249600 |
| Ni | 0.21843400  | -0.88477800 | -0.78823500 |
| C  | 3.98672400  | 2.31818700  | -2.02586900 |
| C  | 2.95768700  | 2.97461600  | -1.31159700 |
| C  | 2.84567300  | 4.36884700  | -1.37703200 |
| C  | 3.77456600  | 5.07018100  | -2.14629200 |
| C  | 4.79901600  | 4.40378900  | -2.84091200 |
| C  | 4.92242000  | 3.01346900  | -2.79113700 |
| C  | 2.71400000  | 0.84701400  | -0.91685100 |
| H  | 2.04932400  | 4.88333900  | -0.84698900 |
| H  | 3.70587600  | 6.15276400  | -2.21110100 |
| H  | 5.50907400  | 4.97886900  | -3.42859400 |
| H  | 5.71860600  | 2.50547400  | -3.32788700 |
| N  | 2.19186700  | 2.04392400  | -0.62328100 |
| N  | 3.80089200  | 0.96627900  | -1.76772000 |
| C  | 4.57412700  | -0.12718300 | -2.32747500 |
| H  | 5.15308900  | 0.24699800  | -3.17440800 |
| H  | 5.26384600  | -0.55369700 | -1.58978900 |
| H  | 3.90457000  | -0.91394800 | -2.68639800 |
| H  | -3.90841600 | -0.41460400 | -3.68461200 |
| H  | -3.45753600 | -3.13060000 | -3.45893700 |
| C  | 1.33478600  | -0.53844700 | 0.73821400  |
| C  | 2.20778400  | -0.45791100 | -0.47520100 |
| C  | 1.80972600  | -0.72430000 | 1.99180000  |
| C  | 0.85412200  | -1.04134000 | 3.17855100  |
| C  | 0.50663900  | -2.55110100 | 3.15154400  |
| H  | 1.39789600  | -3.17432500 | 3.28342500  |
| H  | -0.19993400 | -2.80638700 | 3.95446600  |

### ZP1

|   |             |             |             |
|---|-------------|-------------|-------------|
| C | 1.59673600  | 0.28953900  | -0.25440500 |
| C | 3.17916400  | -1.03825100 | 0.33500400  |
| C | 3.81089100  | 0.08618700  | -0.24441400 |
| C | 3.95403500  | -2.09635000 | 0.82356200  |
| C | 5.19844200  | 0.19529600  | -0.35528800 |
| C | 5.33938500  | -1.99792100 | 0.71716300  |
| H | 3.47648700  | -2.96337700 | 1.26986900  |
| C | 5.95213200  | -0.86993400 | 0.13685400  |
| H | 5.67610300  | 1.06287800  | -0.80203000 |
| H | 5.96384100  | -2.80599600 | 1.08828300  |
| H | 7.03593100  | -0.82805400 | 0.07093800  |
| C | 2.94595900  | 2.21402400  | -1.26833700 |
| H | 3.52490500  | 2.89569200  | -0.63411700 |
| H | 3.46987500  | 2.09626500  | -2.22417300 |
| H | 1.97151800  | 2.66384600  | -1.46170600 |
| N | 1.80185500  | -0.87637700 | 0.31104600  |
| C | 0.24588600  | 0.90281900  | -0.52340600 |
| C | -0.88702100 | 0.04392200  | -0.01018100 |
| H | 0.14320400  | 1.04040500  | -1.61319300 |
| H | 0.22141900  | 1.91246800  | -0.09992100 |
| C | -2.13449300 | 0.36974500  | 0.37615200  |
| H | -0.61699300 | -1.00876300 | 0.02968500  |
| N | 2.77508400  | 0.92958100  | -0.61804200 |
| C | -2.70560800 | 1.81198900  | 0.44193700  |
| C | -1.96551200 | 2.61608600  | 1.54042200  |
| C | -2.57065800 | 2.52525400  | -0.92485500 |
| C | -4.20709200 | 1.84932500  | 0.81264900  |
| H | -2.08757300 | 2.13658900  | 2.51824400  |
| H | -0.89205400 | 2.70314400  | 1.35145200  |
| H | -2.37468600 | 3.63226000  | 1.60985100  |
| H | -3.10332600 | 1.97071000  | -1.70614100 |
| H | -3.00448900 | 3.53204500  | -0.87212700 |
| H | -1.53196400 | 2.63417300  | -1.24613600 |
| H | -4.55565600 | 2.88854200  | 0.79635300  |
| H | -4.82527000 | 1.28528600  | 0.10702600  |
| H | -4.39670700 | 1.46169000  | 1.81886300  |
| C | -3.02834200 | -0.80715100 | 0.76474500  |
| C | -3.82729200 | -1.40312200 | -0.41423000 |
| H | -3.72494200 | -0.52989000 | 1.56367200  |
| H | -2.39783200 | -1.60316700 | 1.17910600  |
| C | -4.71881900 | -2.58125400 | -0.00032200 |
| H | -4.44797400 | -0.62872100 | -0.88623000 |
| H | -3.11614400 | -1.73151500 | -1.18493100 |
| C | -5.48756000 | -3.19728700 | -1.17426000 |
| H | -4.09807800 | -3.35290600 | 0.47683800  |
| H | -5.43044200 | -2.24608400 | 0.76792300  |
| H | -6.11419800 | -4.03512300 | -0.84718400 |
| H | -6.14316400 | -2.45785000 | -1.65111200 |
| H | -4.80176000 | -3.57446000 | -1.94289000 |

Cartesian coordinates for the stationary points given in Fig. S2.

### TS<sub>19-33</sub>

|   |             |             |             |
|---|-------------|-------------|-------------|
| C | -1.28551600 | -1.23164500 | -1.76404800 |
| C | -2.93613100 | -2.29273400 | -3.02948300 |
| C | -3.15911800 | -0.96124900 | -3.13866300 |
| N | -2.17261100 | -0.31532200 | -2.36814800 |
| N | -1.81421000 | -2.46309300 | -2.19595600 |
| C | -2.08672400 | 1.10824100  | -2.19350800 |
| C | -2.79313500 | 1.71185000  | -1.11991200 |
| C | -1.31651700 | 1.87192500  | -3.10056900 |
| C | -2.68009800 | 3.10366000  | -0.95702300 |
| C | -1.24237300 | 3.26132100  | -2.89920700 |

|    |             |             |             |
|----|-------------|-------------|-------------|
| H  | 0.05798100  | -2.81082000 | 2.18803200  |
| C  | -0.46776300 | -0.25596100 | 3.06355100  |
| H  | -0.28574500 | 0.82667700  | 3.12800600  |
| H  | -0.96021000 | -0.47417600 | 2.11229400  |
| H  | -1.14974000 | -0.52481400 | 3.88144300  |
| C  | 1.46945700  | -0.70688300 | 4.55515800  |
| H  | 0.74520300  | -0.92274400 | 5.35085400  |
| H  | 2.36856400  | -1.29508900 | 4.76788000  |
| H  | 1.73748400  | 0.35454300  | 4.63266700  |
| C  | 3.31517100  | -0.72499400 | 2.27341700  |
| H  | 3.81520400  | -0.17262900 | 1.46781400  |
| H  | 3.54496800  | -0.17308100 | 3.19492100  |
| C  | 3.97926400  | -2.11661400 | 2.36876600  |
| H  | 3.72121300  | -2.70069400 | 1.47368200  |
| H  | 3.56722500  | -2.67358700 | 3.22084400  |
| C  | 5.50612400  | -2.04729600 | 2.51294700  |
| H  | 5.92594100  | -1.49634200 | 1.65811900  |
| H  | 5.76002500  | -1.45730500 | 3.40557800  |
| C  | 6.16968200  | -3.42572700 | 2.60710600  |
| H  | 5.96049600  | -4.02740400 | 1.71363700  |
| H  | 7.25865100  | -3.34359000 | 2.70664000  |
| H  | 5.79730200  | -3.98538200 | 3.47417100  |
| H  | 1.42821100  | -0.85041000 | -1.72827800 |
| H  | 2.96737500  | -1.23907600 | -0.57156200 |
| Na | -0.00100400 | 1.60966900  | 0.41872600  |
| H  | 1.63082400  | 3.21243900  | 1.09673600  |
| O  | 0.80376100  | 3.43666300  | 1.56997000  |
| C  | 1.08949600  | 4.27422900  | 2.71430100  |
| C  | 2.19123700  | 3.62184300  | 3.55958500  |
| C  | 1.52666000  | 5.66111900  | 2.22030900  |
| C  | -0.22418900 | 4.36156100  | 3.49399200  |
| H  | 1.88982700  | 2.61816200  | 3.87501800  |
| H  | 3.12235500  | 3.53423600  | 2.98589500  |
| H  | 2.40537700  | 4.21809800  | 4.45393000  |
| H  | 0.74299200  | 6.10981100  | 1.60018400  |
| H  | 1.72906500  | 6.33318100  | 3.06228100  |
| H  | 2.44097300  | 5.58890500  | 1.61952500  |
| H  | -0.10764000 | 4.99985200  | 4.37625800  |
| H  | -1.01523900 | 4.78521600  | 2.86514100  |
| H  | -0.54114600 | 3.36739100  | 3.82714600  |

### 33

|   |             |             |             |
|---|-------------|-------------|-------------|
| C | -1.81464100 | -1.14560900 | -0.00788300 |
| C | -3.73778400 | -2.43797000 | -0.16923200 |
| C | -2.71049100 | -3.21310300 | -0.58967600 |
| N | -1.54837500 | -2.42232700 | -0.51907200 |
| N | -3.20365700 | -1.17556000 | 0.15346900  |
| C | -0.24068600 | -2.89042700 | -0.90785300 |
| C | 0.19164100  | -2.67726100 | -2.24523100 |
| C | 0.55856700  | -3.57801900 | 0.03474200  |
| C | 1.47766600  | -3.12358500 | -2.59803100 |
| C | 1.83234100  | -4.01054400 | -0.37439500 |
| C | 2.29385500  | -3.77644300 | -1.66873700 |
| H | 1.83780300  | -2.97680000 | -3.60968900 |
| H | 2.47006600  | -4.52702400 | 0.33349700  |
| H | 3.28396900  | -4.11155500 | -1.96084100 |
| C | -4.04781000 | -0.05648300 | 0.51561200  |
| C | -4.20162300 | 0.29565000  | 1.87570000  |
| C | -4.75397700 | 0.61381000  | -0.51454700 |
| C | -5.04523300 | 1.37631800  | 2.18200800  |
| C | -5.58927300 | 1.68216300  | -0.15178700 |
| C | -5.72590500 | 2.06945000  | 1.18150700  |
| H | -5.17640100 | 1.66934700  | 3.21791200  |
| H | -6.13864700 | 2.21451900  | -0.92078600 |
| H | -6.37209800 | 2.90250000  | 1.44091800  |
| C | 0.04862200  | -3.91188100 | 1.43592000  |
| H | -0.81502600 | -3.27142300 | 1.63339000  |
| C | -0.41095800 | -5.39035900 | 1.50134200  |
| H | -1.19581700 | -5.60391000 | 0.76658000  |
| H | 0.42705300  | -6.07126800 | 1.30660900  |
| H | -0.80816900 | -5.61850400 | 2.49751800  |
| C | 1.08556800  | -3.61484300 | 2.53834300  |
| H | 1.97669400  | -4.24797600 | 2.45308900  |
| H | 1.39708300  | -2.56826100 | 2.50135200  |
| H | 0.63959000  | -3.80473800 | 3.52200800  |
| C | -3.55787100 | -0.51017300 | 3.00332000  |
| H | -2.76813300 | -1.12677200 | 2.56713600  |
| C | -2.87776300 | 0.38230700  | 4.06194500  |

|    |             |             |             |
|----|-------------|-------------|-------------|
| H  | -2.37387700 | -0.24667100 | 4.80550800  |
| H  | -2.12467800 | 1.02394900  | 3.59417000  |
| H  | -3.59706800 | 1.01445500  | 4.59698600  |
| C  | -4.60322000 | -1.44650100 | 3.65924700  |
| H  | -5.42058000 | -0.87159300 | 4.11261500  |
| H  | -5.04210000 | -2.13215400 | 2.92478500  |
| H  | -4.13303600 | -2.04777100 | 4.44695800  |
| C  | -4.69276300 | 0.16693400  | -1.97791600 |
| H  | -3.83893200 | -0.50999800 | -2.08780700 |
| C  | -4.48043900 | 1.33690400  | -2.96278400 |
| H  | -5.33633000 | 2.02215000  | -2.97086900 |
| H  | -3.58757200 | 1.91254000  | -2.70898500 |
| H  | -4.36344400 | 0.94912900  | -3.98211200 |
| C  | -5.97106100 | -0.62032100 | -2.36317800 |
| H  | -6.11990700 | -1.49301900 | -1.71862700 |
| H  | -6.85901200 | 0.01713200  | -2.27408900 |
| H  | -5.90687200 | -0.97010400 | -3.40073900 |
| C  | -0.73314100 | -2.06216600 | -3.30115500 |
| H  | -1.41979900 | -1.38123700 | -2.78497200 |
| C  | 0.00965600  | -1.24914300 | -4.38329300 |
| H  | 0.67852600  | -0.49383700 | -3.95667000 |
| H  | 0.60583300  | -1.89478200 | -5.03874600 |
| H  | -0.71704300 | -0.72538500 | -5.01379900 |
| C  | -1.58483000 | -3.16285400 | -3.98633200 |
| H  | -0.93749600 | -3.88086100 | -4.50454100 |
| H  | -2.19398800 | -3.71190900 | -3.26303500 |
| H  | -2.25895700 | -2.71510200 | -4.72624000 |
| Ni | -0.55560800 | 0.01737600  | 0.76440400  |
| C  | 3.64843600  | -0.62355700 | 2.77684100  |
| C  | 3.87262100  | -0.68513100 | 1.38096400  |
| C  | 4.97895400  | -1.38459600 | 0.88672800  |
| C  | 5.83613900  | -2.00227300 | 1.80104700  |
| C  | 5.60276500  | -1.92782800 | 3.18328600  |
| C  | 4.50169100  | -1.23258400 | 3.69409500  |
| C  | 2.04487700  | 0.48462300  | 1.66299400  |
| H  | 5.15929700  | -1.44541400 | -0.18302000 |
| H  | 6.70138100  | -2.54940000 | 1.43573000  |
| H  | 6.28859300  | -2.41529000 | 3.87075100  |
| H  | 4.32945800  | -1.17239900 | 4.76513200  |
| N  | 2.88278100  | 0.02008400  | 0.71143200  |
| N  | 2.48562500  | 0.12175000  | 2.92676300  |
| C  | 1.74556500  | 0.33150900  | 4.15563900  |
| H  | 2.14499800  | -0.32925600 | 4.92829800  |
| H  | 1.82495000  | 1.36806600  | 4.50448100  |
| H  | 0.69231700  | 0.08572700  | 3.98450600  |
| H  | -2.68655600 | -4.23631100 | -0.92107300 |
| H  | -4.78775600 | -2.65004000 | -0.07139000 |
| C  | 0.31250100  | 1.62630200  | 0.15955100  |
| C  | 0.82857600  | 1.23189000  | 1.46916300  |
| C  | 0.42788700  | 2.82829000  | -0.44899000 |
| C  | -0.40366900 | 3.21708000  | -1.69831700 |
| C  | -1.82645000 | 3.62782800  | -1.24356000 |
| H  | -1.79507200 | 4.47401600  | -0.54903000 |
| H  | -2.44121000 | 3.92838100  | -2.10372000 |
| H  | -2.31904400 | 2.79620300  | -0.73105800 |
| C  | -0.52636700 | 2.02849200  | -2.67127700 |
| H  | 0.46061200  | 1.75713600  | -3.07268400 |
| H  | -0.95694400 | 1.15813800  | -2.16881700 |
| H  | -1.16329700 | 2.28714700  | -3.52760200 |
| C  | 0.21159400  | 4.39319600  | -2.48850800 |
| H  | -0.39729600 | 4.60357600  | -3.37695500 |
| H  | 0.25613800  | 5.31523800  | -1.89959100 |
| H  | 1.22800100  | 4.16396900  | -2.83293700 |
| C  | 1.33496200  | 3.89447400  | 0.17195700  |
| H  | 2.07767500  | 3.38094100  | 0.79238600  |
| H  | 1.90069600  | 4.43245000  | -0.60035600 |
| C  | 0.62057400  | 4.93683800  | 1.05991000  |
| H  | 0.02263100  | 4.41094100  | 1.81752600  |
| H  | -0.09142600 | 5.52316800  | 0.46279200  |
| C  | 1.59600400  | 5.89784000  | 1.75335900  |
| H  | 2.30730300  | 5.31645900  | 2.35754600  |
| H  | 2.19777800  | 6.41543400  | 0.99198500  |
| C  | 0.89871300  | 6.93358800  | 2.64229200  |
| H  | 0.31886700  | 6.44721800  | 3.43673500  |
| H  | 1.62140400  | 7.60504300  | 3.12110100  |
| H  | 0.20416600  | 7.55241000  | 2.06020700  |
| H  | -0.68456300 | -0.90760800 | 1.97714600  |
| H  | 0.50517900  | 1.79509300  | 2.34618000  |
| Na | 1.47443400  | -0.15467900 | -1.24069900 |
| H  | 3.65638500  | 0.58049700  | -1.05769800 |



|   |            |             |             |
|---|------------|-------------|-------------|
| O | 3.52852100 | 0.49122500  | -2.03088100 |
| C | 4.50517900 | 1.27275900  | -2.75160300 |
| C | 4.50275700 | 2.71239500  | -2.21955700 |
| C | 5.88849100 | 0.62827900  | -2.57614900 |
| C | 4.06677400 | 1.22944700  | -4.21731100 |
| H | 3.50822100 | 3.15854100  | -2.31972800 |
| H | 4.77912300 | 2.73522900  | -1.15850300 |
| H | 5.22037100 | 3.33456400  | -2.76686000 |
| H | 5.87486400 | -0.40657200 | -2.93514100 |
| H | 6.65451500 | 1.17870800  | -3.13482100 |
| H | 6.18176900 | 0.62058100  | -1.51980300 |
| H | 4.76506600 | 1.79001200  | -4.84804000 |
| H | 4.03332300 | 0.19478800  | -4.57691400 |
| H | 3.06978600 | 1.66881200  | -4.33323500 |

### 34

|   |             |             |             |
|---|-------------|-------------|-------------|
| C | -1.83230800 | -1.05598700 | -0.13994600 |
| C | -3.79176200 | -2.26752900 | -0.43885200 |
| C | -2.79370100 | -3.00136400 | -0.98437300 |
| N | -1.60937100 | -2.25585500 | -0.82889900 |
| N | -3.21838700 | -1.07685700 | 0.04656800  |
| C | -0.32072300 | -2.71041900 | -1.28886900 |
| C | 0.11147700  | -2.34302300 | -2.59254000 |
| C | 0.45865900  | -3.54060800 | -0.44883900 |
| C | 1.37796600  | -2.78926200 | -3.01278900 |
| C | 1.71272900  | -3.96525100 | -0.92281100 |
| C | 2.17391900  | -3.58705400 | -2.18303100 |
| H | 1.73522100  | -2.53167300 | -4.00341200 |
| H | 2.33469700  | -4.59025200 | -0.29270000 |
| H | 3.14610300  | -3.92446300 | -2.52886400 |
| C | -4.02280200 | -0.01691100 | 0.61764100  |
| C | -4.16713100 | 0.07194600  | 2.02093000  |
| C | -4.70578600 | 0.86088600  | -0.26117900 |
| C | -4.97609100 | 1.09987900  | 2.53349100  |
| C | -5.50566500 | 1.86611900  | 0.30442600  |
| C | -5.63179500 | 1.99392200  | 1.68808300  |
| H | -5.09926400 | 1.19160300  | 3.60707700  |
| H | -6.03677500 | 2.55342000  | -0.34463500 |
| H | -6.25141200 | 2.78180300  | 2.10552200  |
| C | -0.05223700 | -4.02788100 | 0.90626200  |
| H | -0.90277700 | -3.39994100 | 1.18417200  |
| C | -0.54195300 | -5.49418500 | 0.79797700  |
| H | -1.32961300 | -5.60368900 | 0.04347600  |
| H | 0.28203100  | -6.16532200 | 0.52517300  |
| H | -0.94579300 | -5.82870200 | 1.76083900  |
| C | 0.99471400  | -3.88268200 | 2.02950600  |
| H | 1.87519800  | -4.51422100 | 1.86223900  |
| H | 1.32215700  | -2.84432900 | 2.11850400  |
| H | 0.55020400  | -4.18333500 | 2.98569900  |
| C | -3.55044500 | -0.95382000 | 2.97090000  |
| H | -2.78094400 | -1.50045100 | 2.42000900  |
| C | -2.84165600 | -0.30022300 | 4.17538500  |
| H | -2.35819600 | -1.07385200 | 4.78377600  |
| H | -2.06765500 | 0.39293600  | 3.83195700  |
| H | -3.54045800 | 0.24250700  | 4.82405000  |
| C | -4.62517000 | -1.96355000 | 3.44464600  |
| H | -5.41664800 | -1.46084700 | 4.01485500  |
| H | -5.09530600 | -2.47498600 | 2.59640200  |
| H | -4.17233500 | -2.72484600 | 4.09168800  |
| C | -4.65611000 | 0.69668000  | -1.78265200 |
| H | -3.77713600 | 0.08924800  | -2.02498900 |
| C | -4.51553800 | 2.03648800  | -2.53693700 |
| H | -5.41588400 | 2.65427300  | -2.43708700 |
| H | -3.66348100 | 2.61306700  | -2.17072200 |
| H | -4.36894500 | 1.84637500  | -3.60695700 |
| C | -5.91084300 | -0.05690800 | -2.29415100 |
| H | -6.01159200 | -1.04351200 | -1.83111400 |
| H | -6.81957400 | 0.51484000  | -2.06975700 |
| H | -5.85652100 | -0.19591300 | -3.38084500 |
| C | -0.79181000 | -1.56012900 | -3.55115600 |
| H | -1.44054400 | -0.91748100 | -2.94495700 |
| C | -0.01916500 | -0.65315600 | -4.53362500 |
| H | 0.69791500  | 0.00136600  | -4.02764300 |
| H | 0.52572700  | -1.23999400 | -5.28303000 |
| H | -0.72601400 | -0.01412000 | -5.07398900 |
| C | -1.69994200 | -2.52848900 | -4.35302100 |
| H | -1.09190400 | -3.20824400 | -4.96251000 |
| H | -2.33091000 | -3.13101300 | -3.69382700 |

|    |             |             |             |
|----|-------------|-------------|-------------|
| H  | -2.35575200 | -1.96222600 | -5.02517700 |
| Ni | -0.52418800 | -0.03692200 | 0.74426700  |
| C  | 3.64408900  | -1.09099100 | 2.75946700  |
| C  | 3.82726000  | -1.14704700 | 1.35557100  |
| C  | 4.87958200  | -1.90227500 | 0.82613800  |
| C  | 5.72147400  | -2.58242800 | 1.70925700  |
| C  | 5.52605700  | -2.51582500 | 3.09811200  |
| C  | 4.48153800  | -1.76383000 | 3.64607600  |
| C  | 2.09524600  | 0.13575800  | 1.69712900  |
| H  | 5.03486700  | -1.95168000 | -0.24889300 |
| H  | 6.54588000  | -3.17138900 | 1.31542600  |
| H  | 6.19903200  | -3.05258400 | 3.76118000  |
| H  | 4.34095300  | -1.70885800 | 4.72211600  |
| N  | 2.86554800  | -0.38022800 | 0.72294300  |
| N  | 2.53684600  | -0.27403200 | 2.94846800  |
| C  | 1.86220400  | -0.00910500 | 4.20364000  |
| H  | 2.23150300  | -0.70612500 | 4.95941300  |
| H  | 2.04173300  | 1.01469400  | 4.55379200  |
| H  | 0.78607200  | -0.16318800 | 4.07557800  |
| H  | -2.80345800 | -3.96889100 | -1.45459500 |
| H  | -4.84400500 | -2.46893200 | -0.34398900 |
| C  | 0.46127000  | 1.54097400  | 0.27242400  |
| C  | 0.95063100  | 1.00021600  | 1.54205600  |
| C  | 0.62263000  | 2.80551000  | -0.19396900 |
| C  | -0.28311000 | 3.41120000  | -1.30051800 |
| C  | -1.60683600 | 3.88690100  | -0.64863200 |
| H  | -1.42976200 | 4.62706000  | 0.13815500  |
| H  | -2.26256200 | 4.35230200  | -1.39810400 |
| H  | -2.13420200 | 3.04062700  | -0.19754600 |
| C  | -0.63039000 | 2.37002100  | -2.38202000 |
| H  | 0.26360900  | 2.07540200  | -2.94425300 |
| H  | -1.06568900 | 1.47434200  | -1.93188200 |
| H  | -1.34604300 | 2.78891100  | -3.10140000 |
| C  | 0.36613200  | 4.62000000  | -2.01118600 |
| H  | -0.29610900 | 4.98521700  | -2.80597400 |
| H  | 0.55179400  | 5.45805600  | -1.33099400 |
| H  | 1.32148700  | 4.35249700  | -2.48233600 |
| C  | 1.62648500  | 3.73279900  | 0.50417800  |
| H  | 2.36403000  | 3.09880000  | 1.00900300  |
| H  | 2.18652200  | 4.33532200  | -0.22583100 |
| C  | 1.03981800  | 4.69762700  | 1.55846500  |
| H  | 0.41601300  | 4.12623200  | 2.25976000  |
| H  | 0.37233900  | 5.42493800  | 1.07738000  |
| C  | 2.12234000  | 5.45729600  | 2.33778500  |
| H  | 2.78376100  | 4.73337800  | 2.83516000  |
| H  | 2.75697600  | 6.01177400  | 1.63097000  |
| C  | 1.55112300  | 6.42669100  | 3.37853700  |
| H  | 0.93686700  | 5.89697600  | 4.11737000  |
| H  | 2.34757600  | 6.94976900  | 3.92106900  |
| H  | 0.91558600  | 7.18615600  | 2.90611700  |
| H  | -0.72303500 | -1.04267800 | 1.87873200  |
| H  | 0.68726600  | 1.54773700  | 2.44889900  |
| Na | 1.64667600  | -0.23520400 | -1.23117400 |
| H  | 2.36509600  | 2.08259700  | -1.96538300 |
| O  | 2.72367600  | 1.36186300  | -2.51868600 |
| C  | 4.11354500  | 1.65705100  | -2.83130700 |
| C  | 4.67662200  | 0.36378000  | -3.42371900 |
| C  | 4.14957700  | 2.79327500  | -3.86192900 |
| C  | 4.85150200  | 2.04386800  | -1.54407700 |
| H  | 4.64908000  | -0.44394000 | -2.68376400 |
| H  | 4.09422400  | 0.05733300  | -4.29993500 |
| H  | 5.71686300  | 0.50524600  | -3.73522200 |
| H  | 3.69373500  | 3.70318800  | -3.45350000 |
| H  | 5.18079800  | 3.03366400  | -4.14519100 |
| H  | 3.59773200  | 2.51056800  | -4.76466200 |
| H  | 5.91613200  | 2.21320300  | -1.74219200 |
| H  | 4.44055100  | 2.96981000  | -1.12251200 |
| H  | 4.75125000  | 1.25566000  | -0.79153300 |

### TS<sub>34-35</sub>

|   |             |             |             |
|---|-------------|-------------|-------------|
| C | -1.74876900 | -1.13538800 | 0.05326000  |
| C | -3.54289300 | -2.56299500 | -0.27028000 |
| C | -2.42873300 | -3.25243900 | -0.60915200 |
| N | -1.34231300 | -2.37836700 | -0.42875700 |
| N | -3.13498900 | -1.27359100 | 0.11366400  |
| C | 0.02248400  | -2.78773000 | -0.66555200 |
| C | 0.59679000  | -2.56662600 | -1.94502400 |
| C | 0.71575100  | -3.45876500 | 0.36684000  |

|    |             |             |             |
|----|-------------|-------------|-------------|
| C  | 1.92695100  | -2.98202800 | -2.13973900 |
| C  | 2.03957300  | -3.85878300 | 0.11572900  |
| C  | 2.64408600  | -3.61307400 | -1.11601900 |
| H  | 2.39551200  | -2.83570100 | -3.10637100 |
| H  | 2.60028900  | -4.35992900 | 0.89646100  |
| H  | 3.66807100  | -3.92849000 | -1.29084000 |
| C  | -4.09938900 | -0.26381500 | 0.50833800  |
| C  | -4.40154600 | -0.09659300 | 1.87994100  |
| C  | -4.77985900 | 0.45777300  | -0.50423300 |
| C  | -5.35655300 | 0.87356500  | 2.22501300  |
| C  | -5.72812600 | 1.41131800  | -0.10120700 |
| C  | -6.00391300 | 1.62975300  | 1.24860100  |
| H  | -5.60228700 | 1.02853100  | 3.26951900  |
| H  | -6.25760000 | 1.98605400  | -0.85214500 |
| H  | -6.73650400 | 2.37696700  | 1.53777300  |
| C  | 0.05133900  | -3.81860100 | 1.69653900  |
| H  | -0.93304500 | -3.34236800 | 1.72126200  |
| C  | -0.16338600 | -5.34980200 | 1.79295900  |
| H  | -0.76074500 | -5.72749500 | 0.95481500  |
| H  | 0.79429900  | -5.88402300 | 1.79051800  |
| H  | -0.68578400 | -5.59954000 | 2.72379500  |
| C  | 0.83537700  | -3.29498400 | 2.91784100  |
| H  | 1.84875800  | -3.70861700 | 2.96669000  |
| H  | 0.91019500  | -2.20571100 | 2.88780100  |
| H  | 0.31407200  | -3.57788200 | 3.84043700  |
| C  | -3.80710200 | -0.99609500 | 2.96410100  |
| H  | -2.90525000 | -1.45983800 | 2.55649900  |
| C  | -3.37332600 | -0.21795700 | 4.22330100  |
| H  | -2.87231100 | -0.89714000 | 4.92336000  |
| H  | -2.67121700 | 0.57863600  | 3.95964100  |
| H  | -4.22693300 | 0.22471000  | 4.75075800  |
| C  | -4.80724900 | -2.12047700 | 3.33469800  |
| H  | -5.73278900 | -1.70229800 | 3.74926300  |
| H  | -5.07401100 | -2.72520300 | 2.46017000  |
| H  | -4.36883000 | -2.78714700 | 4.08728900  |
| C  | -4.58078200 | 0.16738700  | -1.99534600 |
| H  | -3.59315300 | -0.29082100 | -2.12071100 |
| C  | -4.62355200 | 1.43168100  | -2.87980600 |
| H  | -5.63166400 | 1.86083900  | -2.92283800 |
| H  | -3.93808900 | 2.19919800  | -2.51660600 |
| H  | -4.33655600 | 1.17446800  | -3.90587500 |
| C  | -5.64525700 | -0.84023300 | -2.50464700 |
| H  | -5.61201500 | -1.78836500 | -1.96045000 |
| H  | -6.65230500 | -0.42103000 | -2.39069100 |
| H  | -5.48490800 | -1.05508400 | -3.56802100 |
| C  | -0.21604300 | -1.99085700 | -3.10998500 |
| H  | -0.99096500 | -1.34215200 | -2.68673500 |
| C  | 0.61470500  | -1.14127500 | -4.09589700 |
| H  | 1.14982000  | -0.31927000 | -3.60754700 |
| H  | 1.34151700  | -1.75307900 | -4.64430100 |
| H  | -0.05546400 | -0.69554100 | -4.83944600 |
| C  | -0.92356600 | -3.13596700 | -3.88205300 |
| H  | -0.18449200 | -3.82069600 | -4.31548000 |
| H  | -1.58743200 | -3.71635000 | -3.23411800 |
| H  | -1.52456600 | -2.72216600 | -4.70016500 |
| Ni | -0.62440400 | 0.20164400  | 0.79625400  |
| C  | 3.18334200  | -0.50752200 | 3.39460300  |
| C  | 3.52203900  | -0.89491900 | 2.07593000  |
| C  | 4.58580700  | -1.78016100 | 1.86518300  |
| C  | 5.27685200  | -2.26031900 | 2.97778000  |
| C  | 4.92345300  | -1.86987100 | 4.28184200  |
| C  | 3.87028900  | -0.98197800 | 4.51136500  |
| C  | 1.85468000  | 0.48928100  | 1.89865600  |
| H  | 4.86461700  | -2.07633100 | 0.85780600  |
| H  | 6.10970900  | -2.94383500 | 2.83580400  |
| H  | 5.48452400  | -2.25839600 | 5.12717900  |
| H  | 3.61011600  | -0.67299600 | 5.51979500  |
| N  | 2.68589800  | -0.26434400 | 1.17112900  |
| N  | 2.11333100  | 0.36432400  | 3.25474000  |
| C  | 1.33707900  | 0.96070500  | 4.32512200  |
| H  | 1.48464700  | 0.37753000  | 5.23731900  |
| H  | 1.63795100  | 1.99761600  | 4.51790000  |
| H  | 0.27697700  | 0.93135900  | 4.05716500  |
| H  | -2.29567600 | -4.26548300 | -0.94488600 |
| H  | -4.57737800 | -2.85484300 | -0.25791100 |
| C  | 0.39414400  | 1.59488800  | 0.07065400  |
| C  | 0.85397500  | 1.42534400  | 1.41393900  |
| C  | 0.54123400  | 2.78627000  | -0.70796000 |
| C  | -0.60938800 | 3.16394300  | -1.70835100 |
| C  | -1.92248000 | 3.43108000  | -0.93844000 |

|    |             |             |             |
|----|-------------|-------------|-------------|
| H  | -1.81157800 | 4.22349100  | -0.19260000 |
| H  | -2.71423700 | 3.74727000  | -1.63076400 |
| H  | -2.25915900 | 2.52729400  | -0.41882600 |
| C  | -0.84630000 | 2.01867600  | -2.71195700 |
| H  | 0.06826300  | 1.81543000  | -3.27530900 |
| H  | -1.14189500 | 1.10110900  | -2.19473800 |
| H  | -1.64186500 | 2.28928100  | -3.41776700 |
| C  | -0.25090500 | 4.42583200  | -2.52092100 |
| H  | -1.03174500 | 4.62100800  | -3.26685000 |
| H  | -0.17082400 | 5.32034400  | -1.89402600 |
| H  | 0.69527000  | 4.30033800  | -3.05761300 |
| C  | 1.30129800  | 3.96389900  | -0.03998400 |
| H  | 2.16081400  | 3.52756200  | 0.48464100  |
| H  | 1.72933000  | 4.60348800  | -0.82117500 |
| C  | 0.54422400  | 4.87146400  | 0.95032700  |
| H  | -0.03298500 | 4.26754900  | 1.66432900  |
| H  | -0.19162400 | 5.48549700  | 0.41511000  |
| C  | 1.48680200  | 5.80411200  | 1.72604600  |
| H  | 2.20764000  | 5.19855200  | 2.29435600  |
| H  | 2.08279500  | 6.39091100  | 1.01242400  |
| C  | 0.75190600  | 6.75336400  | 2.67874200  |
| H  | 0.16585800  | 6.19584300  | 3.42050800  |
| H  | 1.45162900  | 7.39820300  | 3.22340700  |
| H  | 0.05677700  | 7.40306400  | 2.13230300  |
| H  | -1.12456300 | -0.30018300 | 2.12904400  |
| H  | 0.71018200  | 2.26673800  | 2.09521800  |
| Na | 2.08799700  | -0.19920800 | -1.06069900 |
| H  | 1.45744500  | 2.30114700  | -1.46819100 |
| O  | 2.39240900  | 1.54957700  | -2.29371000 |
| C  | 3.54145900  | 2.03880100  | -2.93845000 |
| C  | 4.45842300  | 0.83987700  | -3.27852800 |
| C  | 3.16077900  | 2.75607600  | -4.25194600 |
| C  | 4.32069100  | 3.01114300  | -2.02710500 |
| H  | 4.76728500  | 0.32509900  | -2.35796200 |
| H  | 3.92353800  | 0.12396900  | -3.91534400 |
| H  | 5.36915400  | 1.15046400  | -3.80701400 |
| H  | 2.52145300  | 3.62081600  | -4.04290000 |
| H  | 4.04329700  | 3.11341100  | -4.79887900 |
| H  | 2.60217800  | 2.07526300  | -4.90496200 |
| H  | 5.24550700  | 3.36533500  | -2.50130700 |
| H  | 3.70865900  | 3.88698100  | -1.78647500 |
| H  | 4.58545900  | 2.51575200  | -1.08497100 |

### 35

|   |             |             |             |
|---|-------------|-------------|-------------|
| C | 1.26037400  | -0.95051200 | -1.18417100 |
| C | 2.66057700  | -1.76306200 | -2.82854800 |
| C | 1.47908500  | -2.41857700 | -2.94964500 |
| N | 0.63498200  | -1.91966200 | -1.94663800 |
| N | 2.52507000  | -0.87969700 | -1.74534000 |
| C | -0.73932700 | -2.34978300 | -1.79148000 |
| C | -1.04770800 | -3.32147600 | -0.80739900 |
| C | -1.71058600 | -1.81120100 | -2.66443000 |
| C | -2.39444800 | -3.70263800 | -0.67995900 |
| C | -3.03634100 | -2.24861300 | -2.50987400 |
| C | -3.37790400 | -3.17113800 | -1.52046200 |
| H | -2.67145400 | -4.42507500 | 0.07739700  |
| H | -3.80504300 | -1.85231200 | -3.16415900 |
| H | -4.40984100 | -3.48920900 | -1.40774300 |
| C | 3.60720500  | -0.02440400 | -1.30371500 |
| C | 3.61573200  | 1.33158400  | -1.70263400 |
| C | 4.65094400  | -0.59562700 | -0.53734100 |
| C | 4.68934000  | 2.12840800  | -1.27217800 |
| C | 5.70464600  | 0.24466700  | -0.14498200 |
| C | 5.71968900  | 1.59480500  | -0.49732700 |
| H | 4.72272600  | 3.17402500  | -1.55811900 |
| H | 6.52011200  | -0.16256500 | 0.44267300  |
| H | 6.54083300  | 2.22851300  | -0.17734500 |
| C | -1.36215400 | -0.81536200 | -3.77277700 |
| H | -0.29964700 | -0.56745500 | -3.68510500 |
| C | -1.57813000 | -1.44689600 | -5.16952200 |
| H | -0.99183400 | -2.36531100 | -5.29174900 |
| H | -2.63287500 | -1.69964000 | -5.33019100 |
| H | -1.27845200 | -0.74295200 | -5.95482100 |
| C | -2.14355800 | 0.51010400  | -3.64038200 |
| H | -3.22408700 | 0.35906200  | -3.73717700 |
| H | -1.95461700 | 0.97455000  | -2.66876100 |
| H | -1.83073800 | 1.20694300  | -4.42771300 |
| C | 2.55622100  | 1.92222400  | -2.63403300 |

|    |             |             |             |
|----|-------------|-------------|-------------|
| H  | 1.73965900  | 1.19978500  | -2.72056700 |
| C  | 1.94166600  | 3.22656500  | -2.08387700 |
| H  | 1.15816400  | 3.58341200  | -2.76308400 |
| H  | 1.49048800  | 3.05743600  | -1.10216700 |
| H  | 2.68849500  | 4.02421400  | -1.99229700 |
| C  | 3.14543800  | 2.14125600  | -4.04978300 |
| H  | 3.96223700  | 2.87283700  | -4.02758400 |
| H  | 3.54102700  | 1.20826800  | -4.46776600 |
| H  | 2.37167100  | 2.51874700  | -4.72872400 |
| C  | 4.69321400  | -2.08501900 | -0.18494100 |
| H  | 3.71016800  | -2.51453800 | -0.40574100 |
| C  | 4.97778600  | -2.34621300 | 1.31074800  |
| H  | 5.96962100  | -1.98477000 | 1.60570500  |
| H  | 4.23505600  | -1.85928900 | 1.94883100  |
| H  | 4.94660000  | -3.42320500 | 1.51234900  |
| C  | 5.73629500  | -2.82323100 | -1.06167100 |
| H  | 5.52965100  | -2.69810400 | -2.13031600 |
| H  | 6.74577900  | -2.44032200 | -0.86990200 |
| H  | 5.73198200  | -3.89628400 | -0.83727000 |
| C  | 0.04033900  | -4.00925000 | 0.02228300  |
| H  | 0.85673800  | -3.29074200 | 0.16267000  |
| C  | -0.42826400 | -4.45240600 | 1.42360400  |
| H  | -0.89502500 | -3.63154800 | 1.98993500  |
| H  | -1.14071900 | -5.28581900 | 1.36174000  |
| H  | 0.43704900  | -4.81711700 | 1.99103600  |
| C  | 0.61269800  | -5.22103100 | -0.76113400 |
| H  | -0.17212400 | -5.96704200 | -0.93576300 |
| H  | 1.02691300  | -4.92949600 | -1.73276800 |
| H  | 1.41044100  | -5.69907600 | -0.18047400 |
| Ni | 0.45047300  | 0.15281400  | 0.20181200  |
| C  | -4.27254500 | 2.71471000  | -0.88260800 |
| C  | -4.29140700 | 1.30383400  | -0.79338100 |
| C  | -5.29920700 | 0.57996100  | -1.44240700 |
| C  | -6.24960800 | 1.28887700  | -2.17428600 |
| C  | -6.20757800 | 2.69381500  | -2.26485900 |
| C  | -5.21781600 | 3.43254500  | -1.61753300 |
| C  | -2.59931000 | 1.96949300  | 0.39310900  |
| H  | -5.33261200 | -0.50263300 | -1.36831200 |
| H  | -7.04425600 | 0.74958300  | -2.68267500 |
| H  | -6.96607700 | 3.21358600  | -2.84349100 |
| H  | -5.19494400 | 4.51681400  | -1.67874300 |
| N  | -3.24181900 | 0.87283500  | 0.00144400  |
| N  | -3.18605900 | 3.11366400  | -0.12148100 |
| C  | -2.75405000 | 4.48439300  | 0.07404700  |
| H  | -3.44455800 | 5.02799900  | 0.73010400  |
| H  | -1.76013000 | 4.48146400  | 0.52268900  |
| H  | -2.70351000 | 5.00045900  | -0.89058300 |
| H  | 1.15420900  | -3.17433200 | -3.64262800 |
| H  | 3.57251400  | -1.83396900 | -3.39409400 |
| C  | -0.35986100 | 1.34377100  | 1.45918500  |
| C  | -1.53079500 | 2.03129500  | 1.39435700  |
| C  | 0.39942700  | 1.55759000  | 2.80153400  |
| C  | 1.57101500  | 0.55408900  | 3.08292600  |
| C  | 2.92378800  | 1.00823100  | 2.50529700  |
| H  | 3.27581500  | 1.93510900  | 2.97078600  |
| H  | 3.68923600  | 0.24499800  | 2.68889700  |
| H  | 2.87139800  | 1.16911200  | 1.42252900  |
| C  | 1.20908900  | -0.82624400 | 2.50601400  |
| H  | 0.19416000  | -1.16651900 | 2.76609200  |
| H  | 1.35671500  | -0.87741000 | 1.39527100  |
| H  | 1.91859100  | -1.59013400 | 2.85393200  |
| C  | 1.72424100  | 0.38212800  | 4.61164100  |
| H  | 2.55753900  | -0.29284900 | 4.84348900  |
| H  | 1.92797500  | 1.33745700  | 5.10929700  |
| H  | 0.81541700  | -0.04283600 | 5.05295700  |
| C  | 0.76235700  | 3.05168900  | 3.07246300  |
| H  | -0.14982300 | 3.56693000  | 3.40301700  |
| H  | 1.43974800  | 3.09729500  | 3.93606000  |
| C  | 1.36226300  | 3.87995700  | 1.92437600  |
| H  | 0.66330700  | 3.88098900  | 1.07849400  |
| H  | 2.28499700  | 3.42239600  | 1.55006300  |
| C  | 1.65692900  | 5.32822800  | 2.34162900  |
| H  | 0.73539200  | 5.79286500  | 2.72227700  |
| H  | 2.36338400  | 5.32832800  | 3.18423500  |
| C  | 2.22483700  | 6.18359600  | 1.20372800  |
| H  | 1.52671700  | 6.23403500  | 0.35850200  |
| H  | 2.42408200  | 7.21030600  | 1.53262900  |
| H  | 3.16699500  | 5.76601900  | 0.82686100  |
| H  | -0.20945500 | 0.90653600  | -0.82813400 |
| H  | -1.80085500 | 2.69697600  | 2.22285500  |

|    |             |             |            |
|----|-------------|-------------|------------|
| Na | -2.25684300 | -0.89456200 | 1.18298300 |
| H  | -0.34563900 | 1.30193900  | 3.56867900 |
| O  | -1.85775900 | -1.92999400 | 2.95776800 |
| C  | -2.48076700 | -2.21531700 | 4.15654600 |
| C  | -1.50389100 | -2.94619200 | 5.11523500 |
| C  | -2.96147600 | -0.91320000 | 4.85148800 |
| C  | -3.71545200 | -3.12865200 | 3.92846800 |
| H  | -1.15369600 | -3.87747100 | 4.65363800 |
| H  | -0.62565600 | -2.31561300 | 5.30249000 |
| H  | -1.96026200 | -3.19385500 | 6.08415700 |
| H  | -3.66842300 | -0.38232800 | 4.19881900 |
| H  | -3.45822700 | -1.09400500 | 5.81573700 |
| H  | -2.10484200 | -0.24972900 | 5.02657800 |
| H  | -4.24484500 | -3.38345000 | 4.85789600 |
| H  | -4.42693200 | -2.62604200 | 3.25827900 |
| H  | -3.40156600 | -4.06316600 | 3.44669900 |

### TS<sub>35-P2</sub>

|   |             |             |             |
|---|-------------|-------------|-------------|
| C | -1.33357200 | -0.92825600 | 1.16499600  |
| C | -2.74135900 | -1.74307900 | 2.81290400  |
| C | -1.58119300 | -2.43904800 | 2.90251800  |
| N | -0.73281200 | -1.94158200 | 1.90178000  |
| N | -2.59140300 | -0.83622200 | 1.75162900  |
| C | 0.62844600  | -2.40239900 | 1.73683100  |
| C | 0.92389100  | -3.33617800 | 0.71122200  |
| C | 1.60413600  | -1.93952700 | 2.64898100  |
| C | 2.26130500  | -3.75136600 | 0.58283600  |
| C | 2.91621700  | -2.41817700 | 2.49783100  |
| C | 3.24646600  | -3.29852800 | 1.46689800  |
| H | 2.52860700  | -4.44028200 | -0.20829600 |
| H | 3.68362100  | -2.08924200 | 3.19024100  |
| H | 4.26895600  | -3.64581700 | 1.35505200  |
| C | -3.65795800 | 0.05017100  | 1.33782400  |
| C | -3.61817700 | 1.40582500  | 1.74137900  |
| C | -4.73553200 | -0.48847300 | 0.59728500  |
| C | -4.67511200 | 2.23493500  | 1.33445100  |
| C | -5.77099600 | 0.38466000  | 0.22485600  |
| C | -5.73652700 | 1.73337300  | 0.57746900  |
| H | -4.67355500 | 3.28038300  | 1.62032500  |
| H | -6.61065100 | 0.00204200  | -0.34533200 |
| H | -6.54350600 | 2.39318900  | 0.27433100  |
| C | 1.26837300  | -0.98432300 | 3.79643000  |
| H | 0.23220600  | -0.65582300 | 3.66982500  |
| C | 1.36659500  | -1.70819700 | 5.16184000  |
| H | 0.70710800  | -2.58268500 | 5.20466800  |
| H | 2.39018500  | -2.05275000 | 5.35190400  |
| H | 1.08439600  | -1.02747000 | 5.97364000  |
| C | 2.14643100  | 0.28557000  | 3.78809200  |
| H | 3.20352200  | 0.05277300  | 3.95717000  |
| H | 2.06789100  | 0.80984900  | 2.83198900  |
| H | 1.82460800  | 0.96477400  | 4.58686400  |
| C | -2.51879600 | 1.93572100  | 2.66412800  |
| H | -1.62946200 | 1.31725600  | 2.50954900  |
| C | -2.10832300 | 3.39035200  | 2.36212700  |
| H | -1.24816600 | 3.66634300  | 2.98324900  |
| H | -1.82403000 | 3.50954500  | 1.31273600  |
| H | -2.91272700 | 4.10143200  | 2.58563500  |
| C | -2.95017500 | 1.79488600  | 4.14679600  |
| H | -3.84379200 | 2.39789600  | 4.34987700  |
| H | -3.17857800 | 0.75458000  | 4.40340700  |
| H | -2.14854500 | 2.14041900  | 4.81070000  |
| C | -4.83905300 | -1.97835300 | 0.25867100  |
| H | -3.87647400 | -2.44736000 | 0.48746200  |
| C | -5.12832600 | -2.24459000 | -1.23482600 |
| H | -6.09136400 | -1.82276800 | -1.54474600 |
| H | -4.34915700 | -1.81728100 | -1.87122800 |
| H | -5.16644000 | -3.32466900 | -1.41888500 |
| C | -5.91524400 | -2.66088100 | 1.14062500  |
| H | -5.70690500 | -2.53095900 | 2.20857700  |
| H | -6.90754100 | -2.23880100 | 0.94128300  |
| H | -5.95538400 | -3.73595700 | 0.92947600  |
| C | -0.17087500 | -3.95463900 | -0.16458700 |
| H | -0.94709400 | -3.19530900 | -0.31664500 |
| C | 0.32065200  | -4.40335900 | -1.55715200 |
| H | 0.87582500  | -3.61630900 | -2.09019000 |
| H | 0.96384100  | -5.29061800 | -1.48381400 |
| H | -0.54556800 | -4.68892100 | -2.16632900 |
| C | -0.82676100 | -5.14981500 | 0.57810200  |
| H | -0.08433600 | -5.93487700 | 0.76645700  |

|    |             |             |             |
|----|-------------|-------------|-------------|
| H  | -1.26236300 | -4.85362700 | 1.53840800  |
| H  | -1.62428000 | -5.57962400 | -0.03931400 |
| Ni | -0.55695600 | 0.10906000  | -0.27034300 |
| C  | 4.31911900  | 2.64427500  | 0.62218200  |
| C  | 4.18753400  | 1.24883900  | 0.80584200  |
| C  | 5.12257700  | 0.56136400  | 1.59001400  |
| C  | 6.14830800  | 1.29392500  | 2.18240600  |
| C  | 6.25312900  | 2.68721300  | 2.00402700  |
| C  | 5.34040700  | 3.38756600  | 1.21701400  |
| C  | 2.57387200  | 1.84786000  | -0.51630700 |
| H  | 5.04356700  | -0.51274600 | 1.72208600  |
| H  | 6.88765800  | 0.78179100  | 2.79201500  |
| H  | 7.06694600  | 3.22595300  | 2.48111400  |
| H  | 5.43245700  | 4.45948600  | 1.06806400  |
| N  | 3.09338000  | 0.78390900  | 0.09124600  |
| N  | 3.28076300  | 3.00188000  | -0.22098500 |
| C  | 2.99774100  | 4.34839400  | -0.68170000 |
| H  | 3.73549900  | 4.67609000  | -1.42372300 |
| H  | 2.00435800  | 4.36804900  | -1.13156700 |
| H  | 3.01511900  | 5.04259900  | 0.16502500  |
| H  | -1.27456900 | -3.22263500 | 3.57256700  |
| H  | -3.64903000 | -1.80345300 | 3.38668500  |
| C  | 0.26872300  | 1.28102400  | -1.49469500 |
| C  | 1.52064000  | 1.83949800  | -1.52773200 |
| C  | -0.50843400 | 1.51843700  | -2.82166400 |
| C  | -1.56495500 | 0.43453200  | -3.24161200 |
| C  | -2.98017700 | 0.70952800  | -2.70155900 |
| H  | -3.38349100 | 1.65986200  | -3.06898600 |
| H  | -3.66498200 | -0.07861100 | -3.03676800 |
| H  | -3.00464400 | 0.72905600  | -1.60638100 |
| C  | -1.10055100 | -0.96153500 | -2.78342100 |
| H  | -0.05931900 | -1.19286900 | -3.05034500 |
| H  | -1.21281700 | -1.08246900 | -1.68138600 |
| H  | -1.74383300 | -1.74109200 | -3.21441700 |
| C  | -1.63402400 | 0.40641500  | -4.78714800 |
| H  | -2.38568600 | -0.31778700 | -5.12416500 |
| H  | -1.90898100 | 1.38182700  | -5.20599200 |
| H  | -0.67035700 | 0.11146500  | -5.21878100 |
| C  | -0.99647000 | 2.99245900  | -2.96803500 |
| H  | -0.12010400 | 3.60724400  | -3.21711300 |
| H  | -1.65146600 | 3.05557400  | -3.84719900 |
| C  | -1.69997100 | 3.66148000  | -1.77643900 |
| H  | -0.99535600 | 3.74112800  | -0.93780700 |
| H  | -2.53134700 | 3.04644100  | -1.41455800 |
| C  | -2.22305500 | 5.06188300  | -2.12996100 |
| H  | -1.39236200 | 5.67845900  | -2.50375900 |
| H  | -2.93591500 | 4.98081800  | -2.96321700 |
| C  | -2.89846700 | 5.77585300  | -0.95417500 |
| H  | -2.19993600 | 5.91686500  | -0.11991100 |
| H  | -3.27217200 | 6.76439100  | -1.24593400 |
| H  | -3.74912500 | 5.19473500  | -0.57706600 |
| H  | -0.29068000 | 1.55143300  | -0.11987700 |
| H  | 1.83174000  | 2.33623400  | -2.45102900 |
| Na | 2.25349800  | -1.06394200 | -1.10592900 |
| H  | 0.27565600  | 1.40837700  | -3.58285800 |
| O  | 2.09719700  | -1.99325300 | -2.96002300 |
| C  | 2.81459000  | -2.27486400 | -4.10338500 |
| C  | 1.91783000  | -3.00024300 | -5.14156000 |
| C  | 3.35132300  | -0.96980100 | -4.75070700 |
| C  | 4.02606800  | -3.19098600 | -3.78040300 |
| H  | 1.53316000  | -3.93437000 | -4.71415100 |
| H  | 1.05652100  | -2.36907500 | -5.39375300 |
| H  | 2.44981300  | -3.24255600 | -6.07262200 |
| H  | 3.99958700  | -0.44254600 | -4.03711300 |
| H  | 3.92793500  | -1.14584200 | -5.67047000 |
| H  | 2.51142200  | -0.30673800 | -4.99440700 |
| H  | 4.62685500  | -3.44630100 | -4.66530900 |
| H  | 4.68287400  | -2.69057600 | -3.05511400 |
| H  | 3.67200000  | -4.12517600 | -3.32626200 |

Cartesian coordinates for the stationary points given in Fig. S3.

36

|   |            |             |            |
|---|------------|-------------|------------|
| C | 2.69462400 | -1.25206900 | 1.03425800 |
| C | 4.28168400 | -2.60750600 | 0.44857000 |

|    |             |             |             |
|----|-------------|-------------|-------------|
| C  | 4.06364400  | -2.82073700 | 1.82566100  |
| C  | 5.25925600  | -3.34428600 | -0.22899900 |
| C  | 4.79268500  | -3.75420000 | 2.56466500  |
| C  | 5.99234500  | -4.27756900 | 0.49963800  |
| H  | 5.43647000  | -3.18846600 | -1.28942500 |
| C  | 5.76269400  | -4.47942900 | 1.87458500  |
| H  | 4.62051400  | -3.91199000 | 3.62524500  |
| H  | 6.75948400  | -4.86208200 | 0.00002800  |
| H  | 6.35579000  | -5.21533300 | 2.41001300  |
| C  | 2.52826400  | -1.78687400 | 3.52475700  |
| H  | 1.79724800  | -0.97949900 | 3.55081000  |
| H  | 2.04633200  | -2.71208400 | 3.86038800  |
| H  | 3.34298000  | -1.54125400 | 4.21433000  |
| N  | 3.41388600  | -1.62489000 | -0.01087500 |
| C  | 1.62284100  | -0.19401600 | 1.01871900  |
| C  | 1.07413000  | 0.11549700  | -0.38123400 |
| H  | 2.03011200  | 0.71351900  | 1.48393500  |
| H  | 0.81076700  | -0.52631200 | 1.67904300  |
| C  | 0.69671300  | 1.40463000  | -0.83279200 |
| H  | 1.28986000  | -0.66559100 | -1.10847900 |
| N  | 3.04702900  | -1.94188600 | 2.17734500  |
| C  | 0.65021300  | 1.75888300  | -2.35299800 |
| C  | 1.74281100  | 2.79533200  | -2.72984900 |
| C  | 0.84245800  | 0.52228500  | -3.25739000 |
| C  | -0.72218400 | 2.37660900  | -2.71353000 |
| H  | 1.51117100  | 3.78034400  | -2.31209200 |
| H  | 2.75333300  | 2.52514000  | -2.39308600 |
| H  | 1.76693400  | 2.91103400  | -3.82194300 |
| H  | 0.13176300  | -0.27750800 | -3.02175000 |
| H  | 0.70002700  | 0.80924600  | -4.30570200 |
| H  | 1.85567300  | 0.10099700  | -3.19165200 |
| H  | -0.73217600 | 2.68789700  | -3.76623000 |
| H  | -1.53634700 | 1.66004200  | -2.55454400 |
| H  | -0.93162300 | 3.26441400  | -2.10729100 |
| C  | 0.71644700  | 2.57628900  | 0.15718700  |
| C  | 2.07302500  | 3.29720700  | 0.41293700  |
| H  | 0.34396300  | 2.20771500  | 1.12130200  |
| H  | -0.02506100 | 3.32243500  | -0.15380700 |
| C  | 2.16325900  | 3.85842200  | 1.83979000  |
| H  | 2.92822900  | 2.63971500  | 0.20873400  |
| H  | 2.19258400  | 4.12603300  | -0.29356500 |
| C  | 3.44517600  | 4.65759700  | 2.09547100  |
| H  | 1.28752000  | 4.49460200  | 2.03883700  |
| H  | 2.10032300  | 3.02967100  | 2.56301800  |
| H  | 3.48715400  | 5.03149700  | 3.12588500  |
| H  | 4.33520800  | 4.04176600  | 1.92138600  |
| H  | 3.51107000  | 5.52190200  | 1.42349800  |
| O  | 4.81827000  | 1.87746000  | -1.48476800 |
| C  | 5.99650900  | 2.58140100  | -1.57860800 |
| C  | 6.79601000  | 2.47638900  | -0.25277000 |
| C  | 6.87908100  | 2.02509500  | -2.72828800 |
| C  | 5.70948100  | 4.07922900  | -1.86476300 |
| H  | 6.18591300  | 2.86056100  | 0.57457400  |
| H  | 7.02187700  | 1.42279300  | -0.04070900 |
| H  | 7.74356900  | 3.03428200  | -0.27020300 |
| H  | 6.32460100  | 2.07879200  | -3.67391300 |
| H  | 7.82683200  | 2.56888700  | -2.85285400 |
| H  | 7.11475300  | 0.96945200  | -2.53406600 |
| H  | 6.62385600  | 4.68459900  | -1.94402400 |
| H  | 5.15104800  | 4.17504500  | -2.80419700 |
| H  | 5.08898800  | 4.49633800  | -1.06237600 |
| Na | 3.74491300  | 0.16494300  | -1.47423400 |
| C  | -2.63650700 | -0.35822700 | 0.08779100  |
| C  | -4.51984100 | -1.69064300 | 0.30511000  |
| C  | -4.76232900 | -0.54423100 | 0.99089100  |
| N  | -3.62054400 | 0.26064900  | 0.85645600  |
| N  | -3.23451900 | -1.57135800 | -0.24454600 |
| C  | -3.51498400 | 1.57273300  | 1.45924900  |
| C  | -2.89915200 | 1.69727800  | 2.72634100  |
| C  | -4.08669500 | 2.67849400  | 0.78934400  |
| C  | -2.85467400 | 2.97304200  | 3.30933900  |
| C  | -4.01817200 | 3.93191300  | 1.41912600  |
| C  | -3.40614000 | 4.08076300  | 2.66339300  |
| H  | -2.38819600 | 3.10114200  | 4.27965800  |
| H  | -4.44879000 | 4.79826400  | 0.92897800  |
| H  | -3.36197100 | 5.05868200  | 3.13243700  |
| C  | -2.64720900 | -2.59099900 | -1.08718900 |
| C  | -2.89202400 | -2.54723000 | -2.47910500 |
| C  | -1.89532500 | -3.62659800 | -0.48842400 |
| C  | -2.34772900 | -3.57093000 | -3.27073400 |

|    |             |             |             |
|----|-------------|-------------|-------------|
| C  | -1.37343000 | -4.62557800 | -1.32524900 |
| C  | -1.59317800 | -4.59828900 | -2.70285500 |
| H  | -2.51881600 | -3.56402500 | -4.34173100 |
| H  | -0.79165900 | -5.43279200 | -0.89336300 |
| H  | -1.18054900 | -5.37990600 | -3.33305200 |
| C  | -4.80535300 | 2.53926000  | -0.55364400 |
| H  | -4.55415700 | 1.55717200  | -0.96818100 |
| C  | -6.34176900 | 2.59268900  | -0.36348500 |
| H  | -6.69159900 | 1.80695100  | 0.31532400  |
| H  | -6.64866000 | 3.55886600  | 0.05506200  |
| H  | -6.85097700 | 2.46298900  | -1.32587500 |
| C  | -4.35317900 | 3.59860300  | -1.58261400 |
| H  | -4.63387400 | 4.61211800  | -1.27311900 |
| H  | -3.26920800 | 3.57321800  | -1.72627600 |
| H  | -4.83139400 | 3.40698700  | -2.55038900 |
| C  | -3.75684800 | -1.46264200 | -3.12277600 |
| H  | -3.89313600 | -0.66212100 | -2.38812600 |
| C  | -3.09073100 | -0.83052100 | -4.36428800 |
| H  | -3.70769200 | -0.00557400 | -4.73948800 |
| H  | -2.10041200 | -0.43372200 | -4.12181500 |
| H  | -2.97878100 | -1.55433700 | -5.18010200 |
| C  | -5.15780000 | -2.01801400 | -3.47974000 |
| H  | -5.08126800 | -2.82720900 | -4.21611700 |
| H  | -5.66880100 | -2.41522300 | -2.59544700 |
| H  | -5.78448400 | -1.22727700 | -3.90924100 |
| C  | -1.67778500 | -3.70594500 | 1.02229500  |
| H  | -1.97949600 | -2.74604100 | 1.45422800  |
| C  | -0.19462900 | -3.92497000 | 1.39169900  |
| H  | 0.17093400  | -4.90243500 | 1.05614400  |
| H  | 0.43962700  | -3.15506000 | 0.94161900  |
| H  | -0.07200400 | -3.88653500 | 2.48130400  |
| C  | -2.56643300 | -4.80687700 | 1.65143500  |
| H  | -3.62845600 | -4.62803200 | 1.44893400  |
| H  | -2.30940500 | -5.79427200 | 1.24923400  |
| H  | -2.42767500 | -4.83716400 | 2.73895100  |
| C  | -2.35100900 | 0.48535800  | 3.48058600  |
| H  | -2.18812600 | -0.31324100 | 2.74918600  |
| C  | -0.99251800 | 0.76335200  | 4.15863300  |
| H  | -0.26347600 | 1.14925200  | 3.43834600  |
| H  | -1.08074400 | 1.49056100  | 4.97409800  |
| H  | -0.59868100 | -0.16379800 | 4.59341300  |
| C  | -3.38082300 | -0.02388200 | 4.51980700  |
| H  | -3.58696200 | 0.74609800  | 5.27322900  |
| H  | -4.32986000 | -0.29212300 | 4.04292300  |
| H  | -2.99736300 | -0.91195700 | 5.03684900  |
| Ni | -0.88983500 | 0.23769000  | -0.32737000 |
| H  | -5.62308200 | -0.22543000 | 1.55210400  |
| H  | -5.12673300 | -2.56612200 | 0.15390200  |

### TS<sub>36-37</sub>

|   |             |             |             |
|---|-------------|-------------|-------------|
| C | 2.92674600  | -0.38822200 | 0.92653400  |
| C | 4.38179700  | -2.02164000 | 0.97043000  |
| C | 4.17560500  | -1.63113600 | 2.31477900  |
| C | 5.26574400  | -3.06640100 | 0.68284800  |
| C | 4.83047500  | -2.24424300 | 3.37994200  |
| C | 5.92407700  | -3.69038700 | 1.74575100  |
| H | 5.42657200  | -3.38607300 | -0.34379700 |
| C | 5.71112500  | -3.28786900 | 3.07373900  |
| H | 4.67611000  | -1.92679500 | 4.40753900  |
| H | 6.61508500  | -4.50398000 | 1.54109500  |
| H | 6.24090300  | -3.79034500 | 3.87837100  |
| C | 2.72840900  | 0.11450000  | 3.40844700  |
| H | 2.60219200  | -0.58307200 | 4.24103300  |
| H | 3.40123000  | 0.92421500  | 3.71889600  |
| H | 1.75151800  | 0.53435700  | 3.16743500  |
| N | 3.61443100  | -1.23258200 | 0.13084500  |
| C | 2.10424700  | 0.69550100  | 0.41786500  |
| C | 1.28536700  | 0.32565000  | -0.79732200 |
| H | 3.12432500  | 1.61636000  | -0.02206400 |
| H | 1.56103300  | 1.24211000  | 1.19026700  |
| C | 0.49812400  | 1.15155300  | -1.63236200 |
| H | 1.60126200  | -0.62771200 | -1.22814300 |
| N | 3.24496200  | -0.59872300 | 2.25927300  |
| C | 0.33422700  | 0.77075000  | -3.13908000 |
| C | 1.64136200  | 1.07893200  | -3.92075700 |
| C | 0.03667700  | -0.73062700 | -3.35252600 |
| C | -0.82330100 | 1.55983400  | -3.78873600 |
| H | 2.00049100  | 2.09831900  | -3.76200300 |

|    |             |             |             |
|----|-------------|-------------|-------------|
| H  | 2.44132500  | 0.38209800  | -3.62081700 |
| H  | 1.49839500  | 0.93105100  | -4.99946400 |
| H  | -0.88520400 | -1.02299600 | -2.84093500 |
| H  | -0.07124700 | -0.94156700 | -4.42544600 |
| H  | 0.83772100  | -1.37551700 | -2.97464800 |
| H  | -0.96601800 | 1.23617600  | -4.82767300 |
| H  | -1.75999600 | 1.38810100  | -3.24845200 |
| H  | -0.63673700 | 2.63806100  | -3.80711700 |
| C  | 0.23466600  | 2.60663400  | -1.22752700 |
| C  | 1.15204500  | 3.71121600  | -1.80428400 |
| H  | 0.30623000  | 2.66762500  | -0.13473000 |
| H  | -0.80651200 | 2.86595600  | -1.46468800 |
| C  | 0.86195300  | 5.08318500  | -1.17882300 |
| H  | 2.19962500  | 3.43872100  | -1.62824200 |
| H  | 1.01506600  | 3.79396600  | -2.89105700 |
| C  | 1.70778200  | 6.21251700  | -1.77790100 |
| H  | -0.20470900 | 5.32381300  | -1.30139100 |
| H  | 1.03842600  | 5.03015600  | -0.09473500 |
| H  | 1.48690700  | 7.17697900  | -1.30487400 |
| H  | 2.77923500  | 6.01497600  | -1.64890300 |
| H  | 1.52062500  | 6.31881300  | -2.85401500 |
| O  | 4.02730000  | 2.17140500  | -0.66123100 |
| C  | 4.95209000  | 2.93725800  | 0.09306300  |
| C  | 5.87627400  | 2.01392800  | 0.91401600  |
| C  | 5.79314600  | 3.75746200  | -0.90043500 |
| C  | 4.19550300  | 3.88992200  | 1.04032700  |
| H  | 5.29448400  | 1.39638400  | 1.60765200  |
| H  | 6.43033200  | 1.33875000  | 0.24886700  |
| H  | 6.60913600  | 2.58363400  | 1.49947700  |
| H  | 5.14434200  | 4.40425600  | -1.50109700 |
| H  | 6.53163900  | 4.38584400  | -0.38645300 |
| H  | 6.33251200  | 3.08962300  | -1.58419900 |
| H  | 4.88575100  | 4.51405500  | 1.62141200  |
| H  | 3.53389500  | 4.54879200  | 0.46797500  |
| H  | 3.57720600  | 3.32196300  | 1.74559500  |
| Na | 3.93984900  | 0.24186800  | -1.64487200 |
| C  | -2.19609200 | -0.73081900 | 0.34164200  |
| C  | -4.39295500 | -1.39292600 | 0.71303400  |
| C  | -3.60889000 | -2.16287600 | 1.50584400  |
| N  | -2.28080800 | -1.75605700 | 1.28818300  |
| N  | -3.53887800 | -0.52692600 | 0.00593300  |
| C  | -1.17570900 | -2.28589900 | 2.05483500  |
| C  | -0.32594400 | -3.25864300 | 1.47670100  |
| C  | -1.01114500 | -1.84287600 | 3.38725500  |
| C  | 0.70878800  | -3.77610000 | 2.27061000  |
| C  | 0.03158400  | -2.40414800 | 4.14293200  |
| C  | 0.88656600  | -3.35773000 | 3.59101600  |
| H  | 1.38726400  | -4.50967400 | 1.85217700  |
| H  | 0.17375000  | -2.08612500 | 5.17118600  |
| H  | 1.69647800  | -3.77249600 | 4.18266200  |
| C  | -4.03830100 | 0.47263600  | -0.91112300 |
| C  | -4.16697700 | 1.80948100  | -0.46201800 |
| C  | -4.44803500 | 0.07454800  | -2.20542100 |
| C  | -4.70415700 | 2.75079900  | -1.35375300 |
| C  | -4.98830900 | 1.05528900  | -3.05368000 |
| C  | -5.11082100 | 2.38043700  | -2.63664600 |
| H  | -4.81162200 | 3.78242500  | -1.03851700 |
| H  | -5.31249400 | 0.77753600  | -4.05066500 |
| H  | -5.52714800 | 3.12429300  | -3.30904200 |
| C  | -1.91872400 | -0.78653300 | 4.02198600  |
| H  | -2.66509400 | -0.48919100 | 3.27982500  |
| C  | -2.68011500 | -1.34937900 | 5.24502000  |
| H  | -3.27679800 | -2.22766900 | 4.97318700  |
| H  | -1.98965400 | -1.64858300 | 6.04252700  |
| H  | -3.35706400 | -0.59051600 | 5.65526900  |
| C  | -1.13074200 | 0.48816700  | 4.40240800  |
| H  | -0.35401300 | 0.27305100  | 5.14612200  |
| H  | -0.65148500 | 0.92391300  | 3.51915800  |
| H  | -1.80578800 | 1.23894700  | 4.83088000  |
| C  | -3.80798200 | 2.21835700  | 0.96772900  |
| H  | -3.09038700 | 1.48601900  | 1.35033700  |
| C  | -3.12678100 | 3.60006700  | 1.05423200  |
| H  | -2.79894900 | 3.78644200  | 2.08377500  |
| H  | -2.24839600 | 3.64965500  | 0.40338300  |
| H  | -3.80815900 | 4.41387700  | 0.77797100  |
| C  | -5.06474500 | 2.17616600  | 1.87346600  |
| H  | -5.82051300 | 2.89032500  | 1.52346600  |
| H  | -5.51893400 | 1.17922000  | 1.88188900  |
| H  | -4.80065000 | 2.43900100  | 2.90515100  |
| C  | -4.35836500 | -1.37746800 | -2.67981900 |

|    |             |             |             |
|----|-------------|-------------|-------------|
| H  | -3.67951800 | -1.90705100 | -2.00238600 |
| C  | -3.78156200 | -1.50729300 | -4.10720800 |
| H  | -4.46218900 | -1.09126200 | -4.85947300 |
| H  | -2.82005600 | -0.99501600 | -4.19758600 |
| H  | -3.63126800 | -2.56543500 | -4.35222300 |
| C  | -5.74161800 | -2.07227300 | -2.60711400 |
| H  | -6.15307400 | -2.05425700 | -1.59255800 |
| H  | -6.45996100 | -1.57400200 | -3.26958200 |
| H  | -5.66007900 | -3.11983900 | -2.92118600 |
| C  | -0.54857300 | -3.77252100 | 0.05394700  |
| H  | -1.03861000 | -2.97116200 | -0.50938600 |
| C  | 0.76517500  | -4.10493700 | -0.68397300 |
| H  | 1.47181200  | -3.26997300 | -0.63403600 |
| H  | 1.25587500  | -4.99355700 | -0.26832700 |
| H  | 0.55117000  | -4.31606100 | -1.73846500 |
| C  | -1.49393300 | -5.00038100 | 0.05889500  |
| H  | -1.05186300 | -5.82805600 | 0.62753900  |
| H  | -2.46374700 | -4.75947600 | 0.50813200  |
| H  | -1.67129900 | -5.34865000 | -0.96606000 |
| Ni | -0.64832400 | 0.04311100  | -0.37996600 |
| H  | -3.85773800 | -2.94386000 | -2.20311600 |
| H  | -5.46058500 | -1.37063500 | 0.58392700  |

### 37

|   |             |             |             |
|---|-------------|-------------|-------------|
| C | 2.69428900  | -0.90199500 | -0.40164600 |
| C | 3.89728900  | -2.18554800 | -1.72320100 |
| C | 4.13000100  | -2.64692400 | -0.40005000 |
| C | 4.54232500  | -2.81984700 | -2.79049500 |
| C | 4.98715900  | -3.70433800 | -0.11929300 |
| C | 5.40119500  | -3.89191600 | -2.51527000 |
| H | 4.36463000  | -2.49145500 | -3.81193700 |
| C | 5.62196500  | -4.33034600 | -1.20418100 |
| H | 5.16731700  | -4.04014200 | 0.89873200  |
| H | 5.90468800  | -4.39420900 | -3.33769900 |
| H | 6.29436800  | -5.16358300 | -1.01876900 |
| C | 3.25641000  | -1.91350600 | 1.85447400  |
| H | 2.24071700  | -1.66917100 | 2.17678600  |
| H | 3.48265200  | -2.93376300 | 2.17712500  |
| H | 3.95727700  | -1.22896900 | 2.35653800  |
| N | 3.03297500  | -1.10955700 | -1.71084300 |
| C | 1.88024900  | 0.14230200  | 0.07807800  |
| C | 0.94965600  | 0.84301400  | -0.80542700 |
| H | 3.95261500  | 1.43866200  | 0.10772100  |
| H | 1.80436800  | 0.28201300  | 1.15095400  |
| C | 0.23352900  | 2.05524800  | -0.61155800 |
| H | 0.94024700  | 0.43499500  | -1.82199500 |
| N | 3.34953700  | -1.83429200 | 0.41657100  |
| C | -0.20289200 | 2.87493900  | -1.86702400 |
| C | 1.03659000  | 3.45586900  | -2.60870300 |
| C | -0.98014600 | 2.02955500  | -2.89945400 |
| C | -1.11827100 | 4.05312900  | -1.47080400 |
| H | 1.73156600  | 3.96776700  | -1.93618500 |
| H | 1.58102600  | 2.65273200  | -3.13340500 |
| H | 0.73671000  | 4.16863100  | -3.38862200 |
| H | -1.91525200 | 1.65472700  | -2.47641300 |
| H | -1.21541700 | 2.63862100  | -3.78413300 |
| H | -0.40642500 | 1.16257400  | -3.24476600 |
| H | -1.49659000 | 4.55846300  | -2.36824200 |
| H | -1.97707800 | 3.68826200  | -0.89807900 |
| H | -0.60312200 | 4.80525100  | -0.86435000 |
| C | 0.42909200  | 2.81593100  | 0.70475400  |
| C | 1.58352700  | 3.84457200  | 0.79181400  |
| H | 0.58896900  | 2.07801800  | 1.50000700  |
| H | -0.50178600 | 3.32821900  | 0.97952300  |
| C | 1.76132100  | 4.40092300  | 2.21211200  |
| H | 2.52363200  | 3.38464800  | 0.45874600  |
| H | 1.39623300  | 4.68666100  | 0.11183100  |
| C | 2.84683300  | 5.47769300  | 2.31808500  |
| H | 0.80358200  | 4.81604600  | 2.55821300  |
| H | 1.99697200  | 3.57386200  | 2.89795200  |
| H | 2.94400000  | 5.85257600  | 3.34404900  |
| H | 3.82533100  | 5.08621200  | 2.01310700  |
| H | 2.61895400  | 6.33422600  | 1.67119800  |
| O | 4.51211400  | 1.92499800  | -0.54010600 |
| C | 5.90348200  | 1.90248500  | -0.12304700 |
| C | 6.34402700  | 0.45324000  | 0.11423800  |
| C | 6.67650900  | 2.53317100  | -1.28329900 |
| C | 6.04688600  | 2.74243900  | 1.15246400  |

|    |             |             |             |
|----|-------------|-------------|-------------|
| H  | 5.76849300  | -0.00158200 | 0.92880600  |
| H  | 6.19320800  | -0.15716100 | -0.78184700 |
| H  | 7.40396200  | 0.40931100  | 0.38906400  |
| H  | 6.30355100  | 3.54235200  | -1.48988000 |
| H  | 7.74292100  | 2.60187500  | -1.04494100 |
| H  | 6.57295700  | 1.92831500  | -2.19230300 |
| H  | 7.09067400  | 2.77510500  | 1.48502600  |
| H  | 5.70504400  | 3.76768900  | 0.97764400  |
| H  | 5.44874300  | 2.31632800  | 1.96689800  |
| Na | 3.19875500  | 1.11511600  | -2.17756600 |
| C  | -2.42847700 | -0.51113700 | 0.42539900  |
| C  | -4.50774400 | -1.55440800 | 0.50356000  |
| C  | -3.89431500 | -1.80804200 | 1.68651500  |
| N  | -2.64052800 | -1.17902900 | 1.63843300  |
| N  | -3.62560700 | -0.77017700 | -0.25500500 |
| C  | -1.67192900 | -1.31604300 | 2.70068100  |
| C  | -0.91750900 | -2.50853100 | 2.77070600  |
| C  | -1.55040800 | -0.28978200 | 3.66757000  |
| C  | -0.02249900 | -2.65712300 | 3.84382000  |
| C  | -0.63762900 | -0.48535300 | 4.71511400  |
| C  | 0.11866800  | -1.65686700 | 4.80560400  |
| H  | 0.56487600  | -3.56624000 | 3.92430900  |
| H  | -0.51960100 | 0.28265900  | 5.47084400  |
| H  | 0.81350700  | -1.78970500 | 5.62954300  |
| C  | -3.94206600 | -0.34073800 | -1.59707300 |
| C  | -4.76839600 | 0.79415600  | -1.77492400 |
| C  | -3.47681500 | -1.10683300 | -2.68959500 |
| C  | -5.11046000 | 1.15792200  | -3.08680300 |
| C  | -3.84145400 | -0.69480400 | -3.98170700 |
| C  | -4.64864500 | 0.42525300  | -4.18158100 |
| H  | -5.74367800 | 2.02288900  | -3.25247500 |
| H  | -3.49306900 | -1.26354300 | -4.83768400 |
| H  | -4.92221600 | 0.72472200  | -5.18873900 |
| C  | -2.42075400 | 0.96608600  | 3.60623900  |
| H  | -2.66086200 | 1.14139300  | 2.55172100  |
| C  | -3.75022600 | 0.75023300  | 4.37342400  |
| H  | -4.31522800 | -0.09634100 | 3.96949900  |
| H  | -3.55735400 | 0.55568100  | 5.43596500  |
| H  | -4.38152500 | 1.64430800  | 4.30070000  |
| C  | -1.70882700 | 2.23224900  | 4.12469600  |
| H  | -1.52664300 | 2.18934200  | 5.20561200  |
| H  | -0.75117300 | 2.38691700  | 3.61821700  |
| H  | -2.33747900 | 3.11047800  | 3.93666600  |
| C  | -5.31996200 | 1.58833900  | -0.58942000 |
| H  | -4.73336500 | 1.31447800  | 0.29403200  |
| C  | -5.18250900 | 3.11508500  | -0.77482400 |
| H  | -5.49421400 | 3.63129300  | 0.14101800  |
| H  | -4.14816900 | 3.39634800  | -0.99195800 |
| H  | -5.81477600 | 3.48523200  | -1.59075100 |
| C  | -6.79867100 | 1.21731900  | -0.31378600 |
| H  | -7.42909100 | 1.46784000  | -1.17591600 |
| H  | -6.91590000 | 0.14719700  | -0.11230100 |
| H  | -7.17613400 | 1.76980600  | 0.55519200  |
| C  | -2.63552000 | -2.37077500 | -2.50966700 |
| H  | -2.42077500 | -2.48308300 | -1.44280200 |
| C  | -1.27394200 | -2.27056300 | -3.23255600 |
| H  | -1.39879000 | -2.14430000 | -4.31508000 |
| H  | -0.69528000 | -1.42559000 | -2.84700100 |
| H  | -0.69015000 | -3.18350400 | -3.06652000 |
| C  | -3.41717500 | -3.62580900 | -2.96719600 |
| H  | -4.36182600 | -3.72833900 | -2.42038600 |
| H  | -3.65201700 | -3.58079300 | -4.03768800 |
| H  | -2.82019100 | -4.52881300 | -2.79221400 |
| C  | -1.06021800 | -3.63084600 | 1.74078000  |
| H  | -1.75670400 | -3.29159900 | 0.96817200  |
| C  | 0.27708300  | -3.94455000 | 1.03353700  |
| H  | 0.68029300  | -3.05336100 | 0.54296200  |
| H  | 1.02787100  | -4.32042900 | 1.73913000  |
| H  | 0.12719200  | -4.71664000 | 0.26941900  |
| C  | -1.65909000 | -4.90559400 | 2.38201600  |
| H  | -0.99894000 | -5.30494400 | 3.16153200  |
| H  | -2.63425400 | -4.70362700 | 2.84047600  |
| H  | -1.79369900 | -5.68612300 | 1.62373100  |
| Ni | -0.90999600 | 0.42017800  | -0.14942100 |
| H  | -4.21743400 | -2.37470100 | 2.54245500  |
| H  | -5.47012600 | -1.85648500 | 0.12917300  |

### 38

|    |             |             |             |
|----|-------------|-------------|-------------|
| C  | 1.58882200  | 1.14350900  | 0.16339700  |
| C  | 2.61826800  | 2.47384000  | 1.56793200  |
| C  | 2.04997400  | 3.30291800  | 0.56905600  |
| C  | 3.34389900  | 3.05071900  | 2.61533300  |
| C  | 2.19904400  | 4.68755700  | 0.58029400  |
| C  | 3.49446000  | 4.44142500  | 2.63493500  |
| H  | 3.76193600  | 2.42961600  | 3.40449600  |
| C  | 2.93216900  | 5.24755600  | 1.63396500  |
| H  | 1.76823400  | 5.31407000  | -0.19570900 |
| H  | 4.05231100  | 4.90664100  | 3.44364400  |
| H  | 3.06448400  | 6.32534800  | 1.67524800  |
| C  | 0.61183000  | 2.81602300  | -1.45687800 |
| H  | 1.20804700  | 2.80864400  | -2.37922100 |
| H  | -0.21869000 | 2.10529800  | -1.55001900 |
| H  | 0.19944000  | 3.81660100  | -1.30669000 |
| N  | 2.34915300  | 1.14544300  | 1.28364600  |
| C  | 1.09439900  | -0.03143100 | -0.52492300 |
| C  | 1.42319700  | -1.33677600 | 0.06425100  |
| H  | 5.73850500  | -1.04114600 | -0.79867500 |
| H  | 1.18090200  | 0.04238200  | -1.61296200 |
| C  | 1.92768500  | -2.45607300 | -0.54296100 |
| H  | 1.24186200  | -1.38781600 | 1.13774600  |
| N  | 1.40272100  | 2.43943900  | -0.30280200 |
| C  | 2.09929000  | -3.80049300 | 0.19405600  |
| C  | 1.95856800  | -3.67514000 | 1.72453000  |
| C  | 1.02050000  | -4.80697900 | -0.28381100 |
| C  | 3.49520700  | -4.40658500 | -0.09691000 |
| H  | 2.70597500  | -2.99181300 | 2.15798000  |
| H  | 0.96609300  | -3.32433100 | 2.02241600  |
| H  | 2.11927000  | -4.65322400 | 2.19333200  |
| H  | 1.07434200  | -4.97759600 | -1.36454100 |
| H  | 1.15176700  | -5.77949100 | 0.20941100  |
| H  | 0.01855900  | -4.43640700 | -0.04906300 |
| H  | 3.59987900  | -5.38485900 | 0.38896100  |
| H  | 3.66645800  | -4.55442600 | -1.16842000 |
| H  | 4.29952500  | -3.76025900 | 0.28279200  |
| C  | 2.16908400  | -2.45080600 | -2.04875800 |
| C  | 3.48340500  | -1.77577500 | -2.49849100 |
| H  | 1.33437900  | -1.94062600 | -2.54950700 |
| H  | 2.16535300  | -3.47434800 | -2.44337000 |
| C  | 3.65932000  | -1.72205200 | -4.02207000 |
| H  | 3.51562000  | -0.75197400 | -2.09774900 |
| H  | 4.33392000  | -2.32348000 | -2.06006500 |
| C  | 4.97456100  | -1.06828300 | -4.45933600 |
| H  | 3.60425100  | -2.74164800 | -4.42865200 |
| H  | 2.81431900  | -1.17326100 | -4.46013500 |
| H  | 5.06768000  | -1.04023600 | -5.55098200 |
| H  | 5.04389300  | -0.03446700 | -4.09606300 |
| H  | 5.84134200  | -1.61928400 | -4.07026200 |
| O  | 5.74196600  | -0.67266500 | 0.10097700  |
| C  | 6.85243600  | 0.27157000  | 0.20726400  |
| C  | 8.16220900  | -0.50376700 | 0.02627500  |
| C  | 6.68461700  | 1.35429400  | -0.86458900 |
| C  | 6.74420200  | 0.86261600  | 1.61325600  |
| H  | 8.24508500  | -1.29935200 | 0.77399700  |
| H  | 8.21313500  | -0.96087900 | -0.97002100 |
| H  | 9.02633200  | 0.16151400  | 0.13019700  |
| H  | 5.73173500  | 1.87857400  | -0.73846500 |
| H  | 7.49265800  | 2.09128600  | -0.80240800 |
| H  | 6.71106500  | 0.91717800  | -1.87099600 |
| H  | 7.57251900  | 1.55385800  | 1.79875300  |
| H  | 5.81019100  | 1.42333300  | 1.73574200  |
| H  | 6.78957100  | 0.07000500  | 2.36951500  |
| Na | 3.67791300  | -0.67978100 | 1.00445600  |
| C  | -2.69526100 | -0.00244000 | 0.04889700  |
| C  | -4.94288200 | 0.65128200  | 0.13095700  |
| C  | -4.86411100 | -0.55959700 | 0.73437600  |
| N  | -3.51576700 | -0.95726400 | 0.68630200  |
| N  | -3.64201200 | 0.99093600  | -0.28323700 |
| C  | -3.05507500 | -2.20723900 | 1.23066000  |
| C  | -3.14797800 | -3.37469200 | 0.43846800  |
| C  | -2.57189400 | -2.24640800 | 2.55882000  |
| C  | -2.74301900 | -4.59353100 | 1.00612400  |
| C  | -2.17080100 | -3.48788900 | 3.07887400  |
| C  | -2.25679800 | -4.65254000 | 2.31348900  |
| H  | -2.80764700 | -5.50292700 | 0.41671900  |
| H  | -1.79602900 | -3.54238300 | 4.09631800  |
| H  | -1.94814200 | -5.60427300 | 2.73578900  |
| C  | -3.33821700 | 2.23085800  | -0.94830900 |
| C  | -3.11012700 | 3.38921300  | -0.16943200 |

|    |             |             |             |
|----|-------------|-------------|-------------|
| C  | -3.32672500 | 2.27199500  | -2.36214000 |
| C  | -2.85924800 | 4.59775000  | -0.83988700 |
| C  | -3.07012900 | 3.50363200  | -2.98580400 |
| C  | -2.83841200 | 4.65777800  | -2.23456400 |
| H  | -2.67966600 | 5.49920600  | -0.26219800 |
| H  | -3.05805600 | 3.55893900  | -4.06996500 |
| H  | -2.64770800 | 5.60264200  | -2.73513200 |
| C  | -2.48937300 | -0.99413500 | 3.43037300  |
| H  | -2.85640200 | -0.15254700 | 2.83566100  |
| C  | -3.39045600 | -1.11432900 | 4.68181700  |
| H  | -4.43278600 | -1.30898900 | 4.40342300  |
| H  | -3.06075400 | -1.92889200 | 5.33847800  |
| H  | -3.35962900 | -0.18417200 | 5.26208600  |
| C  | -1.03002200 | -0.66754300 | 3.82125700  |
| H  | -0.57769100 | -1.48302300 | 4.40028000  |
| H  | -0.42600800 | -0.49313100 | 2.92422100  |
| H  | -0.99530200 | 0.24078300  | 4.43531600  |
| C  | -3.11762800 | 3.35551900  | 1.35857800  |
| H  | -3.37781200 | 2.33855900  | 1.66703500  |
| C  | -1.71537700 | 3.65892700  | 1.93358500  |
| H  | -1.73285300 | 3.60105500  | 3.02887400  |
| H  | -0.98401100 | 2.93333700  | 1.56402700  |
| H  | -1.37461900 | 4.66403700  | 1.65622800  |
| C  | -4.18224900 | 4.30913500  | 1.94855900  |
| H  | -3.97018700 | 5.35521700  | 1.69583500  |
| H  | -5.18420900 | 4.06982400  | 1.57346300  |
| H  | -4.19822000 | 4.22782500  | 3.04211400  |
| C  | -3.60103500 | 1.03108900  | -3.21076700 |
| H  | -3.72963200 | 0.18676300  | -2.52725300 |
| C  | -2.40646400 | 0.68878600  | -4.12899900 |
| H  | -2.19653300 | 1.49812600  | -4.83960900 |
| H  | -1.50800200 | 0.50660100  | -3.52912400 |
| H  | -2.62189800 | -0.21806200 | -4.70756900 |
| C  | -4.90676500 | 1.18452000  | -4.02559500 |
| H  | -5.76295500 | 1.37957200  | -3.36950900 |
| H  | -4.83696400 | 2.01282800  | -4.74150400 |
| H  | -5.11225700 | 0.26792900  | -4.59195000 |
| C  | -3.66902900 | -3.33952900 | -0.99812000 |
| H  | -3.92156000 | -2.30151700 | -1.23403400 |
| C  | -2.58347100 | -3.78093700 | -2.00618500 |
| H  | -1.69811100 | -3.14245900 | -1.91935400 |
| H  | -2.27865800 | -4.82148700 | -1.83833900 |
| H  | -2.96596000 | -3.70465900 | -3.03175300 |
| C  | -4.95456100 | -4.18397200 | -1.15899400 |
| H  | -4.76534800 | -5.24441600 | -0.95177100 |
| H  | -5.74159100 | -3.84402800 | -0.47591300 |
| H  | -5.33576400 | -4.10625000 | -2.18450700 |
| Ni | -0.90757900 | -0.02908300 | -0.23463200 |
| H  | -5.62387400 | -1.17133100 | 1.19011500  |
| H  | -5.78457400 | 1.29980800  | -0.04237200 |

### TS<sub>38-39</sub>

|   |             |             |             |
|---|-------------|-------------|-------------|
| C | -0.82929100 | -1.92935400 | -1.25776100 |
| C | -0.66762300 | -4.09326500 | -1.00367000 |
| C | -0.00545900 | -3.78059300 | -2.21530700 |
| C | -0.72562600 | -5.42090900 | -0.56701000 |
| C | 0.58936200  | -4.75795400 | -3.01125500 |
| C | -0.12663200 | -6.40449200 | -1.35631000 |
| H | -1.21943400 | -5.67450100 | 0.36786100  |
| C | 0.52036900  | -6.07912800 | -2.56005200 |
| H | 1.08392900  | -4.51296600 | -3.94684800 |
| H | -0.16095800 | -7.44177200 | -1.03428000 |
| H | 0.97434300  | -6.86741800 | -3.15405000 |
| C | 0.37099400  | -1.59899700 | -3.45402500 |
| H | 0.76555900  | -0.65474300 | -3.06926000 |
| H | 1.17797000  | -2.13465000 | -3.95801200 |
| H | -0.42217000 | -1.38992000 | -4.18295800 |
| N | -1.19062900 | -2.93877800 | -0.44343300 |
| C | -1.17353600 | -0.52909200 | -1.12526200 |
| C | -1.74763300 | 0.06819200  | 0.04184100  |
| H | -3.99032100 | 0.20419000  | 0.33961200  |
| H | -1.32481200 | -0.02239800 | -2.07537000 |
| C | -2.75289400 | 1.12429200  | 0.05359500  |
| H | -1.62625600 | -0.48634000 | 0.97768600  |
| N | -0.11972700 | -2.40341300 | -2.35078500 |
| C | -2.73486800 | 2.09175500  | 1.28072400  |
| C | -2.48238200 | 1.32452000  | 2.59582800  |
| C | -1.62630500 | 3.16104300  | 1.11597200  |

|    |             |             |             |
|----|-------------|-------------|-------------|
| C  | -4.08147000 | 2.83515000  | 1.43415600  |
| H  | -3.19761900 | 0.50088000  | 2.71245800  |
| H  | -1.46907900 | 0.91226600  | 2.64172300  |
| H  | -2.60239300 | 1.99208900  | 3.45881200  |
| H  | -1.76608700 | 3.74512900  | 0.19930900  |
| H  | -1.63482300 | 3.86961200  | 1.95534900  |
| H  | -0.64039100 | 2.68517900  | 1.06286500  |
| H  | -4.03452300 | 3.53789300  | 2.27629000  |
| H  | -4.34340800 | 3.41691400  | 0.54370800  |
| H  | -4.90163000 | 2.13880100  | 1.63002300  |
| C  | -2.94315400 | 1.83417900  | -1.30044000 |
| C  | -3.84583800 | 1.11927100  | -2.32572200 |
| H  | -1.96224200 | 2.02197800  | -1.77359400 |
| H  | -3.36956700 | 2.83207600  | -1.14458600 |
| C  | -3.81884900 | 1.77601600  | -3.71269200 |
| H  | -3.55640300 | 0.06421200  | -2.42133200 |
| H  | -4.87658400 | 1.11235900  | -1.95218100 |
| C  | -4.75261900 | 1.10089900  | -4.72338700 |
| H  | -4.09090200 | 2.83751500  | -3.61709800 |
| H  | -2.78962800 | 1.76396700  | -4.10152800 |
| H  | -4.70718800 | 1.58814000  | -5.70482100 |
| H  | -4.48771400 | 0.04493000  | -4.86360600 |
| H  | -5.79523200 | 1.13507700  | -4.38312100 |
| O  | -4.65578100 | -0.74181800 | 0.54847300  |
| C  | -6.04545800 | -0.71563400 | 0.85630400  |
| C  | -6.25492700 | -0.43161800 | 2.35642900  |
| C  | -6.79091700 | 0.32483500  | 0.00218500  |
| C  | -6.59550200 | -2.11781700 | 0.52823400  |
| H  | -5.71626800 | -1.17382100 | 2.95855400  |
| H  | -5.87411900 | 0.55750600  | 2.62719700  |
| H  | -7.31647500 | -0.47445800 | 2.63085000  |
| H  | -6.68768400 | 0.08903500  | -1.06206100 |
| H  | -7.85996500 | 0.33965700  | 0.24757600  |
| H  | -6.39184700 | 1.32994100  | 0.16838200  |
| H  | -7.67225100 | -2.19060700 | 0.72506600  |
| H  | -6.42386800 | -2.35477200 | -0.52849900 |
| H  | -6.09706600 | -2.88062800 | 1.14372900  |
| Na | -3.16122400 | -2.26012600 | 0.45071000  |
| C  | 2.00877700  | 0.88319100  | 0.51105500  |
| C  | 4.21770900  | 1.61885300  | 0.53045200  |
| C  | 3.89381900  | 1.30299800  | 1.80778500  |
| N  | 2.55857000  | 0.86187700  | 1.80136500  |
| N  | 3.08199100  | 1.36130200  | -0.25308700 |
| C  | 1.90098100  | 0.39936200  | 3.00487900  |
| C  | 1.51313100  | 1.34571800  | 3.98349600  |
| C  | 1.73977800  | -0.99461800 | 3.20707700  |
| C  | 0.92537600  | 0.86589200  | 5.16611200  |
| C  | 1.13534200  | -1.41622500 | 4.40158400  |
| C  | 0.72761900  | -0.49813500 | 5.37109100  |
| H  | 0.61791900  | 1.57086300  | 5.93045400  |
| H  | 0.99433100  | -2.47553500 | 4.58101800  |
| H  | 0.26633400  | -0.84811900 | 6.28960100  |
| C  | 3.08733200  | 1.47604200  | -1.69310200 |
| C  | 3.74572500  | 0.47566200  | -2.44591000 |
| C  | 2.48025300  | 2.59910900  | -2.30420400 |
| C  | 3.76746600  | 0.61308200  | -3.84407900 |
| C  | 2.52526700  | 2.68374700  | -3.70433000 |
| C  | 3.15803000  | 1.70063600  | -4.46907700 |
| H  | 4.26948200  | -0.13847800 | -4.44515800 |
| H  | 2.06485900  | 3.52915500  | -4.20225500 |
| H  | 3.18317400  | 1.78952300  | -5.55097900 |
| C  | 2.28468500  | -2.02234000 | 2.21255500  |
| H  | 2.25785400  | -1.56568300 | 1.21788200  |
| C  | 3.75897300  | -2.36510500 | 2.54972300  |
| H  | 4.39316200  | -1.47190800 | 2.54833500  |
| H  | 3.83079800  | -2.83099700 | 3.54071000  |
| H  | 4.16244400  | -3.07073300 | 1.81317600  |
| C  | 1.44359800  | -3.31193500 | 2.13270300  |
| H  | 1.49210900  | -3.89415200 | 3.06133800  |
| H  | 0.39650100  | -3.08825700 | 1.90786000  |
| H  | 1.82306000  | -3.95121100 | 1.32785600  |
| C  | 4.45690200  | -0.71211100 | -1.79195400 |
| H  | 4.24692300  | -0.68455000 | -0.71867700 |
| C  | 3.94361500  | -2.07291500 | -2.31240100 |
| H  | 4.47726500  | -2.89085100 | -1.81387900 |
| H  | 2.87598800  | -2.19358600 | -2.10687500 |
| H  | 4.10467000  | -2.18239000 | -3.39184200 |
| C  | 5.99088900  | -0.60378000 | -1.97139400 |
| H  | 6.26873800  | -0.64682300 | -3.03158100 |
| H  | 6.37674100  | 0.33761000  | -1.56376500 |

|    |             |             |             |
|----|-------------|-------------|-------------|
| H  | 6.49474800  | -1.43052600 | -1.45665900 |
| C  | 1.85387700  | 3.71927500  | -1.47272300 |
| H  | 1.51392100  | 3.27747600  | -0.53064800 |
| C  | 0.62083500  | 4.36186200  | -2.13922500 |
| H  | 0.88542600  | 4.92444000  | -3.04299800 |
| H  | -0.12422600 | 3.60559800  | -2.40694000 |
| H  | 0.15191400  | 5.06607700  | -1.44275800 |
| C  | 2.91293200  | 4.80053500  | -1.13849700 |
| H  | 3.76472500  | 4.37415000  | -0.59745400 |
| H  | 3.29254400  | 5.26962600  | -2.05497500 |
| H  | 2.47118700  | 5.58532200  | -0.51247600 |
| C  | 1.75599500  | 2.84856900  | 3.82216000  |
| H  | 1.95665600  | 3.04481200  | 2.76320300  |
| C  | 0.53263700  | 3.69962100  | 4.22934900  |
| H  | -0.37262800 | 3.36507600  | 3.71849800  |
| H  | 0.35248800  | 3.65686100  | 5.31020900  |
| H  | 0.70644700  | 4.75033500  | 3.96856400  |
| C  | 2.99288900  | 3.30326300  | 4.63867800  |
| H  | 2.82966100  | 3.13223900  | 5.70979500  |
| H  | 3.89974000  | 2.76274000  | 4.34954600  |
| H  | 3.17472100  | 4.37449200  | 4.49003700  |
| Ni | 0.36151400  | 0.32239700  | -0.16882700 |
| H  | 4.47698700  | 1.34063100  | 2.71038800  |
| H  | 5.13508400  | 1.98571200  | 0.10423700  |

### 39

|   |             |             |             |
|---|-------------|-------------|-------------|
| C | 1.12189100  | 2.19819700  | 0.30191600  |
| C | 1.65189400  | 3.35611600  | 2.06494000  |
| C | 0.80569700  | 4.17984800  | 1.28617400  |
| C | 2.16088700  | 3.83092500  | 3.27945000  |
| C | 0.45951400  | 5.47367100  | 1.67646100  |
| C | 1.81411800  | 5.12043800  | 3.67885200  |
| H | 2.80522700  | 3.20611100  | 3.89263300  |
| C | 0.97714100  | 5.93024900  | 2.88940600  |
| H | -0.17953200 | 6.10692400  | 1.06783800  |
| H | 2.19826200  | 5.51038400  | 4.61726300  |
| H | 0.73071800  | 6.93263500  | 3.22788500  |
| C | -0.30504500 | 3.85627800  | -0.96791000 |
| H | 0.33972400  | 4.24480500  | -1.76587000 |
| H | -0.89889800 | 3.02550800  | -1.35406100 |
| H | -0.98745100 | 4.64756300  | -0.65131000 |
| N | 1.84580300  | 2.14218700  | 1.42398800  |
| C | 1.03284800  | 1.17015400  | -0.72932600 |
| C | 1.54472900  | -0.14498000 | -0.57684700 |
| H | 3.38915100  | -0.73974300 | -1.33408800 |
| H | 0.91662600  | 1.56893100  | -1.73520200 |
| C | 2.34237400  | -0.89785200 | -1.65164600 |
| H | 1.85399000  | -0.42104100 | 0.43341900  |
| N | 0.47541400  | 3.41533200  | 0.17501300  |
| C | 2.17641800  | -2.45838200 | -1.60986600 |
| C | 2.29713700  | -2.95072500 | -0.15167900 |
| C | 0.82979300  | -2.90181400 | -2.21010500 |
| C | 3.32885500  | -3.11493100 | -2.40281000 |
| H | 3.20236500  | -2.53786000 | 0.31262900  |
| H | 1.42755400  | -2.66125500 | 0.44994700  |
| H | 2.36512200  | -4.04615100 | -0.12312000 |
| H | 0.72447600  | -2.58706400 | -3.25512700 |
| H | 0.73913700  | -3.99490200 | -2.19011000 |
| H | -0.01138900 | -2.47690800 | -1.64652500 |
| H | 3.24643400  | -4.20810300 | -2.35265800 |
| H | 3.32649800  | -2.83963600 | -3.46367400 |
| H | 4.29840300  | -2.83081400 | -1.97892200 |
| C | 2.18260400  | -0.29259800 | -3.06824400 |
| C | 3.15434900  | 0.86177400  | -3.36627000 |
| H | 1.14634900  | 0.04042400  | -3.22633500 |
| H | 2.35260800  | -1.06637900 | -3.82510200 |
| C | 2.93822400  | 1.50031600  | -4.74448200 |
| H | 3.07287500  | 1.63717300  | -2.59177000 |
| H | 4.18316600  | 0.48166500  | -3.29823100 |
| C | 3.92965100  | 2.62827300  | -5.05138400 |
| H | 3.01643400  | 0.72429800  | -5.51968200 |
| H | 1.91052600  | 1.88887600  | -4.80937200 |
| H | 3.74973300  | 3.06545600  | -6.04071700 |
| H | 3.85333200  | 3.43472000  | -4.31099700 |
| H | 4.96305900  | 2.26145100  | -5.03109800 |
| O | 4.99946900  | -0.67685200 | 0.54718300  |
| C | 6.33724200  | -1.00284100 | 0.53916400  |
| C | 6.53214000  | -2.49473200 | 0.91696700  |



|    |             |             |             |
|----|-------------|-------------|-------------|
| C  | 6.94157000  | -0.76240700 | -0.86935500 |
| C  | 7.12813800  | -0.13779700 | 1.55980200  |
| H  | 6.10081200  | -2.68122400 | 1.90868200  |
| H  | 6.00187600  | -3.13121000 | 0.19838400  |
| H  | 7.58794500  | -2.80093400 | 0.93496600  |
| H  | 6.80867600  | 0.29016100  | -1.15144600 |
| H  | 8.01271400  | -1.00365500 | -0.92830300 |
| H  | 6.41082700  | -1.37522400 | -1.60826700 |
| H  | 8.20261800  | -0.36864500 | 1.59266800  |
| H  | 7.01956800  | 0.92624700  | 1.30395700  |
| H  | 6.71722900  | -0.29167100 | 2.56746700  |
| Na | 3.71619500  | 0.72858800  | 1.30813900  |
| C  | -2.16524800 | -0.78020200 | 0.12131000  |
| C  | -4.46516100 | -1.03055400 | 0.16108300  |
| C  | -3.95380800 | -1.87891200 | 1.08861600  |
| N  | -2.55894200 | -1.72625000 | 1.06132500  |
| N  | -3.37642000 | -0.36331600 | -0.41844700 |
| C  | -1.68779300 | -2.42060700 | 1.99179000  |
| C  | -1.39577900 | -3.78794900 | 1.77412700  |
| C  | -1.22076400 | -1.72251000 | 3.13124100  |
| C  | -0.58377700 | -4.43927800 | 2.71666400  |
| C  | -0.40659700 | -2.42248700 | 4.03579500  |
| C  | -0.08471600 | -3.76406000 | 3.82990500  |
| H  | -0.33607200 | -5.48458600 | 2.57297000  |
| H  | -0.02979600 | -1.91282700 | 4.91524800  |
| H  | 0.54845400  | -4.28516700 | 4.54087500  |
| C  | -3.53466100 | 0.70222600  | -1.38506100 |
| C  | -3.93067900 | 1.97679100  | -0.91711900 |
| C  | -3.33313400 | 0.42934100  | -2.75818700 |
| C  | -4.09859600 | 2.99808300  | -1.86708700 |
| C  | -3.51005400 | 1.48781400  | -3.66332800 |
| C  | -3.88353500 | 2.76006900  | -3.22471100 |
| H  | -4.40633400 | 3.98562200  | -1.53892500 |
| H  | -3.36100200 | 1.31330700  | -4.72255500 |
| H  | -4.01813200 | 3.56200700  | -3.94399600 |
| C  | -1.64233100 | -0.28613500 | 3.44756900  |
| H  | -2.03084800 | 0.16377900  | 2.52893500  |
| C  | -2.78422400 | -0.28360500 | 4.49545600  |
| H  | -3.64949700 | -0.85964100 | 4.14744800  |
| H  | -2.44586900 | -0.72271700 | 5.44181100  |
| H  | -3.11490600 | 0.74244600  | 4.69696500  |
| C  | -0.46930900 | 0.59973700  | 3.91709000  |
| H  | -0.05786000 | 0.25951100  | 4.87491600  |
| H  | 0.33641200  | 0.61574800  | 3.17718900  |
| H  | -0.81456800 | 1.63043400  | 4.05838500  |
| C  | -4.22047600 | 2.26153000  | 0.55920600  |
| H  | -3.96776200 | 1.36638700  | 1.13550300  |
| C  | -3.35881600 | 3.41287300  | 1.12315000  |
| H  | -3.59809900 | 3.57724200  | 2.18029800  |
| H  | -2.29250500 | 3.17808200  | 1.05176400  |
| H  | -3.54379700 | 4.35455600  | 0.59244200  |
| C  | -5.72624200 | 2.54612100  | 0.77990200  |
| H  | -6.04090500 | 3.44992100  | 0.24472500  |
| H  | -6.34725400 | 1.71562800  | 0.42520500  |
| H  | -5.93274200 | 2.69658000  | 1.84593600  |
| C  | -3.00788000 | -0.97739000 | -3.26156500 |
| H  | -2.54467200 | -1.52712200 | -2.43620800 |
| C  | -2.00211100 | -0.99008500 | -4.43091400 |
| H  | -2.42338600 | -0.54908700 | -5.34214600 |
| H  | -1.08769600 | -0.44603000 | -4.17410000 |
| H  | -1.72500000 | -2.02347500 | -4.66717600 |
| C  | -4.30872100 | -1.72249000 | -3.65537100 |
| H  | -5.00672900 | -1.78431400 | -2.81300900 |
| H  | -4.81794400 | -1.20849700 | -4.47991400 |
| H  | -4.07795700 | -2.74348700 | -3.98160100 |
| C  | -1.97229000 | -4.57832900 | 0.59701500  |
| H  | -2.29434200 | -3.85997700 | -0.16569300 |
| C  | -0.93754500 | -5.51993700 | -0.05753800 |
| H  | -0.01286900 | -4.99141800 | -0.29896300 |
| H  | -0.68869500 | -6.36338500 | 0.59714500  |
| H  | -1.34856100 | -5.93767400 | -0.98394100 |
| C  | -3.21126000 | -5.40097300 | 1.03590000  |
| H  | -2.93113900 | -6.13290000 | 1.80303800  |
| H  | -4.00252400 | -4.76868900 | 1.45130000  |
| H  | -3.62751300 | -5.94717900 | 0.18111600  |
| Ni | -0.41000300 | -0.11344600 | -0.34255500 |
| H  | -4.43868500 | -2.56108500 | 1.76333600  |
| H  | -5.48073300 | -0.82933800 | -0.13154300 |

Cartesian coordinates for the stationary points given in Fig. S4.

#### 40

|   |             |             |             |
|---|-------------|-------------|-------------|
| C | -1.94244000 | -0.67001600 | 0.41639200  |
| C | -2.79226200 | -2.62533700 | 0.10843400  |
| C | -3.85753100 | -1.79541700 | 0.52892600  |
| C | -3.03332700 | -3.97491700 | -0.17570900 |
| C | -5.16192200 | -2.26976500 | 0.68395800  |
| C | -4.33150400 | -4.45619700 | -0.02768600 |
| H | -2.22294500 | -4.62035100 | -0.50204000 |
| C | -5.38019900 | -3.61621800 | 0.39641300  |
| H | -5.97342500 | -1.62801300 | 1.01531100  |
| H | -4.54371600 | -5.50015900 | -0.24163200 |
| H | -6.38055300 | -4.02651900 | 0.50363500  |
| C | -3.98741000 | 0.63395900  | 1.19688100  |
| H | -4.96592100 | 0.70570100  | 0.71166600  |
| H | -4.13629500 | 0.59080200  | 2.28287300  |
| H | -3.41242200 | 1.52569200  | 0.94324700  |
| N | -1.61614700 | -1.89290700 | 0.04963500  |
| C | -0.98085800 | 0.48077700  | 0.50139900  |
| C | -1.24820800 | 1.55852000  | -0.53342400 |
| H | 0.02686300  | 0.06896800  | 0.36441800  |
| H | -1.00207200 | 0.89941300  | 1.51639600  |
| C | -0.99891400 | 2.87336900  | -0.39961600 |
| H | -1.64758400 | 1.18094100  | -1.47010200 |
| N | -3.29055400 | -0.54346500 | 0.71075300  |
| C | -1.32259100 | 3.88460200  | -1.51800700 |
| C | -1.80035000 | 3.20921900  | -3.20921900 |
| C | -2.45054900 | 4.83070000  | -1.03385400 |
| C | -0.07170700 | 4.72962300  | -1.86006100 |
| H | -1.04557800 | 2.52358200  | -3.21858900 |
| H | -2.72946700 | 2.64713000  | -2.67118500 |
| H | -1.99656500 | 3.97257800  | -3.57951800 |
| H | -2.17394100 | 5.37520800  | -0.12471100 |
| H | -2.67983800 | 5.57534100  | -1.80610100 |
| H | -3.36784600 | 4.26807600  | -0.82397500 |
| H | -0.31417700 | 5.45957600  | -2.64208900 |
| H | 0.30119100  | 5.28800400  | -0.99536700 |
| H | 0.74158700  | 4.09566300  | -2.23116400 |
| C | -0.37375800 | 3.41843500  | 0.87930800  |
| C | 1.14265700  | 3.15239800  | 1.00540100  |
| H | -0.87331500 | 2.97728900  | 1.75365500  |
| H | -0.54604900 | 4.49789700  | 0.96046300  |
| C | 1.72818600  | 3.68149000  | 2.32165200  |
| H | 1.33963900  | 2.07625800  | 0.92132600  |
| H | 1.66544700  | 3.62066400  | 0.16089600  |
| C | 3.23314100  | 3.42492000  | 2.45420200  |
| H | 1.53164700  | 4.76068100  | 2.40217500  |
| H | 1.20237400  | 3.21339100  | 3.16649200  |
| H | 3.62441700  | 3.81164300  | 3.40248000  |
| H | 3.45500500  | 2.35146800  | 2.41464200  |
| H | 3.78980300  | 3.90967900  | 1.64228400  |
| C | 3.90939600  | -2.39076900 | -0.41263500 |
| C | 3.60303600  | -1.05568400 | -0.04973500 |
| C | 4.63956900  | -0.13131700 | 0.13080800  |
| C | 5.94855200  | -0.56820300 | -0.05332700 |
| C | 6.23482600  | -1.90079100 | -0.41270900 |
| C | 5.21990700  | -2.83724300 | -0.59937200 |
| C | 1.72911700  | -2.07838200 | -0.21293900 |
| H | 4.41594100  | 0.89550800  | 0.40459500  |
| H | 6.77003700  | 0.13020200  | 0.08155400  |
| H | 7.26931900  | -2.20475300 | -0.54753000 |
| H | 5.44512700  | -3.86316900 | -0.87723100 |
| H | 0.66718800  | -2.31328500 | -0.21849300 |
| N | 2.22804200  | -0.89719500 | 0.06729200  |
| N | 2.68178200  | -3.02626800 | -0.51119600 |
| C | 2.44687800  | -4.41256400 | -0.86048600 |
| H | 2.92354300  | -5.08379300 | -0.13685300 |
| H | 1.37070800  | -4.59876600 | -0.85665800 |
| H | 2.83958000  | -4.63486400 | -1.85932600 |

#### TS<sub>40-41</sub>

|   |            |            |             |
|---|------------|------------|-------------|
| C | 0.98522900 | 1.69315600 | -0.90838400 |
|---|------------|------------|-------------|

|   |             |             |             |
|---|-------------|-------------|-------------|
| C | 3.02394700  | 2.04198400  | -0.17685600 |
| C | 3.10595800  | 2.06577400  | -1.59478300 |
| C | 4.18616400  | 2.23301700  | 0.57909700  |
| C | 4.30623700  | 2.26316400  | -2.26687900 |
| C | 5.39861800  | 2.43810100  | -0.09205600 |
| H | 4.13697700  | 2.24415800  | 1.66584400  |
| C | 5.46107200  | 2.45393400  | -1.49076000 |
| H | 4.36106500  | 2.26728700  | -3.35258900 |
| H | 6.30762000  | 2.59402300  | 0.48418000  |
| H | 6.41418200  | 2.61640500  | -1.98700100 |
| C | 1.35488200  | 1.91610000  | -3.40754700 |
| H | 2.08871100  | 2.46359500  | -4.00556500 |
| H | 1.21909500  | 0.91902800  | -3.84992300 |
| H | 0.39994600  | 2.44978900  | -3.45791700 |
| N | 1.72854400  | 1.79767700  | 0.22792600  |
| C | -0.39123200 | 1.42144900  | -1.00042700 |
| C | -1.28976900 | 1.58547800  | 0.11145100  |
| H | -0.52545600 | -0.47129800 | 0.20761300  |
| H | -0.80011400 | 1.24188800  | -1.98968900 |
| C | -2.64016100 | 1.36995200  | 0.15275900  |
| H | -0.79800600 | 1.92964900  | 1.01952300  |
| N | 1.80610700  | 1.85298000  | -2.03742800 |
| C | -3.48825600 | 1.65898300  | 1.40298800  |
| C | -2.63292000 | 1.96159200  | 2.64904500  |
| C | -4.39785600 | 2.89044900  | 1.15234200  |
| C | -4.38735400 | 0.44417500  | 1.74513000  |
| H | -1.95633700 | 1.13123900  | 2.88455700  |
| H | -2.02781500 | 2.86529200  | 2.52036100  |
| H | -3.28234200 | 2.12051500  | 3.51869000  |
| H | -5.06201300 | 2.74064200  | 0.29377600  |
| H | -5.03119500 | 3.09577900  | 2.02616800  |
| H | -3.79079100 | 3.78066900  | 0.95302100  |
| H | -5.01757900 | 0.66062800  | 2.61775700  |
| H | -5.05537700 | 0.18021800  | 0.91792000  |
| H | -3.77866000 | -0.43793600 | 1.98034900  |
| C | -3.36858400 | 0.91849800  | -1.10453800 |
| C | -3.21845800 | -0.57992100 | -1.44967500 |
| H | -3.01047200 | 1.50002300  | -1.96818600 |
| H | -4.44104400 | 1.13951300  | -1.03046600 |
| C | -3.95257200 | -0.99123100 | -2.73296100 |
| H | -2.14957600 | -0.81580700 | -1.55966500 |
| H | -3.59204100 | -1.18440800 | -0.61012800 |
| C | -3.80355900 | -2.47901200 | -3.06948700 |
| H | -5.01923300 | -0.74396700 | -2.63338500 |
| H | -3.57906000 | -0.38754300 | -3.57215600 |
| H | -4.33815500 | -2.74062800 | -3.99022800 |
| H | -2.74939100 | -2.75040900 | -3.21102500 |
| H | -4.20439900 | -3.10959000 | -2.26501300 |
| C | 1.00501900  | -2.90819400 | 1.72021600  |
| C | -0.09144000 | -2.50711700 | 0.93173800  |
| C | -1.03181700 | -3.42800500 | 0.46852900  |
| C | -0.83318500 | -4.76047300 | 0.82165900  |
| C | 0.26272800  | -5.16113800 | 1.61037600  |
| C | 1.20213400  | -4.24363200 | 2.07538100  |
| C | 1.11341700  | -0.70079500 | 1.42944700  |
| H | -1.87445200 | -3.11423700 | -0.13790800 |
| H | -1.54187700 | -5.50921000 | 0.48154900  |
| H | 0.37820600  | -6.21066500 | 1.86311100  |
| H | 2.04529500  | -4.55600400 | 2.68284200  |
| H | 1.45835200  | 0.35110000  | 1.33612500  |
| N | 0.02434000  | -1.12921400 | 0.78459000  |
| N | 1.73346900  | -1.74941500 | 2.00243500  |
| C | 2.97219100  | -1.67477200 | 2.76775300  |
| H | 3.70958000  | -2.36211600 | 2.34390100  |
| H | 3.35903200  | -0.65680000 | 2.70514500  |
| H | 2.78925900  | -1.93518900 | 3.81467300  |

## 41

|   |            |             |             |
|---|------------|-------------|-------------|
| C | 1.96512500 | -1.28364500 | 0.06935900  |
| C | 3.65107500 | -0.06346900 | -0.61801000 |
| C | 4.11470400 | -0.77046300 | 0.52471900  |
| C | 4.51769400 | 0.81939000  | -1.27382900 |
| C | 5.40122400 | -0.61359800 | 1.02588700  |
| C | 5.81773200 | 0.97940000  | -0.77486500 |
| H | 4.19048800 | 1.34504600  | -2.16814400 |
| C | 6.25532600 | 0.27627100  | 0.35391700  |
| H | 5.74156400 | -1.15130800 | 1.90726700  |
| H | 6.50194000 | 1.65796400  | -1.27884300 |

|   |             |             |             |
|---|-------------|-------------|-------------|
| H | 7.26911200  | 0.41806000  | 0.71873300  |
| C | 3.05096200  | -2.52827200 | 1.99267300  |
| H | 4.07130000  | -2.89737600 | 2.13463300  |
| H | 2.69211400  | -2.11968100 | 2.94793900  |
| H | 2.41250900  | -3.37184300 | 1.71293100  |
| N | 2.33425900  | -0.37961800 | -0.87637500 |
| C | 0.68596500  | -1.84712200 | 0.22252500  |
| C | -0.28932800 | -1.77643600 | -0.80765000 |
| H | -1.44055700 | 0.09672500  | -0.54642700 |
| H | 0.45488600  | -2.34611200 | 1.15802500  |
| C | -1.64135100 | -2.06435900 | -0.74684200 |
| H | 0.10878100  | -1.42659400 | -1.76005200 |
| N | 3.03777400  | -1.54721900 | 0.93310200  |
| C | -2.51183300 | -2.19348100 | -2.01431000 |
| C | -1.85746400 | -1.56135500 | -3.25974500 |
| C | -2.75666600 | -3.69247100 | -2.33364800 |
| C | -3.88581900 | -1.50632700 | -1.81472300 |
| H | -1.62748600 | -0.49927200 | -3.10769200 |
| H | -0.92849000 | -2.06997500 | -3.53691500 |
| H | -2.53914000 | -1.63111700 | -4.11621700 |
| H | -3.26587300 | -4.20755300 | -1.51161300 |
| H | -3.38001200 | -3.80794200 | -3.23092400 |
| H | -1.80438900 | -4.20480300 | -2.51041700 |
| H | -4.53778700 | -1.67555000 | -2.68155300 |
| H | -4.41112600 | -1.88432300 | -0.93092700 |
| H | -3.77058200 | -0.42006800 | -1.69836300 |
| C | -2.21761200 | -2.60198400 | 0.56036100  |
| C | -2.46494500 | -1.54028400 | 1.65203400  |
| H | -1.54044100 | -3.36464400 | 0.97773000  |
| H | -3.16406000 | -3.12742900 | 0.38094900  |
| C | -2.93914400 | -2.13008600 | 2.98673300  |
| H | -1.53871500 | -0.97224500 | 1.81494500  |
| H | -3.21650300 | -0.81963500 | 1.29298900  |
| C | -3.19009900 | -1.07024300 | 4.06496600  |
| H | -3.85895700 | -2.70994500 | 2.82178000  |
| H | -2.18986700 | -2.84874300 | 3.34824000  |
| H | -3.52421100 | -1.52343600 | 5.00574800  |
| H | -2.27840100 | -0.49754200 | 4.27662800  |
| H | -3.96138900 | -0.35650200 | 3.74818000  |
| C | -1.02663900 | 3.30034000  | -0.05503700 |
| C | -1.91685900 | 2.21027400  | -0.10892500 |
| C | -3.27749400 | 2.36890700  | 0.16150400  |
| C | -3.70905800 | 3.65265900  | 0.48326400  |
| C | -2.81740700 | 4.74236300  | 0.53524500  |
| C | -1.45960100 | 4.58738700  | 0.26756400  |
| C | 0.12020100  | 1.47118500  | -0.60452100 |
| H | -3.96193100 | 1.52846800  | 0.12275300  |
| H | -4.75967700 | 3.81883300  | 0.70052800  |
| H | -3.19801600 | 5.72650100  | 0.79069200  |
| H | -0.77475300 | 5.42808900  | 0.30875100  |
| H | 0.97605200  | 0.79578000  | -0.86085700 |
| N | -1.15211900 | 1.10248300  | -0.45731300 |
| N | 0.23529200  | 2.78901000  | -0.37013300 |
| C | 1.48984400  | 3.53670500  | -0.41577200 |
| H | 1.65437900  | 4.03643600  | 0.54292100  |
| H | 2.30825600  | 2.83838500  | -0.60087700 |
| H | 1.45334500  | 4.28304700  | -1.21474500 |

## TS<sub>41-42</sub>

|   |             |             |             |
|---|-------------|-------------|-------------|
| C | 2.18777300  | -1.04038200 | 0.06575000  |
| C | 3.73595200  | 0.34104400  | -0.59817700 |
| C | 4.30301300  | -0.40431200 | 0.46828200  |
| C | 4.50382200  | 1.32568200  | -1.23180200 |
| C | 5.60206100  | -0.19146600 | 0.92069100  |
| C | 5.81041600  | 1.54304800  | -0.78479900 |
| H | 4.09074200  | 1.89171300  | -2.06310000 |
| C | 6.35330000  | 0.79744500  | 0.27303200  |
| H | 6.02321500  | -0.76209700 | 1.74423400  |
| H | 6.42100800  | 2.30138800  | -1.26860000 |
| H | 7.37262400  | 0.98866500  | 0.59742000  |
| C | 3.43920800  | -2.32400200 | 1.86217700  |
| H | 3.19617800  | -1.96709500 | 2.87209900  |
| H | 2.76999900  | -3.15033700 | 1.60963400  |
| H | 4.46781000  | -2.69839300 | 1.86340600  |
| N | 2.43180500  | -0.05516100 | -0.81818900 |
| C | 0.94534800  | -1.72145100 | 0.21817600  |
| C | -0.00942600 | -1.70248100 | -0.79710000 |
| H | -1.53389000 | -0.27376400 | -0.62407600 |

|   |             |             |             |
|---|-------------|-------------|-------------|
| H | 0.73435700  | -2.19563700 | 1.17163800  |
| C | -1.39554600 | -1.96034300 | -0.72558800 |
| H | 0.36884200  | -1.32526800 | -1.74718400 |
| N | 3.30517700  | -1.28325200 | 0.86655100  |
| C | -2.17713200 | -2.32026800 | -2.01937700 |
| C | -1.56596000 | -1.67316200 | -3.28074800 |
| C | -2.17679600 | -3.85519100 | -2.23774000 |
| C | -3.64412700 | -1.83630600 | -1.92480700 |
| H | -1.47319700 | -0.58479800 | -3.17845000 |
| H | -0.57483500 | -2.07643900 | -3.51247900 |
| H | -2.20750800 | -1.86841400 | -4.14892000 |
| H | -2.64909900 | -4.38541800 | -1.40323500 |
| H | -2.72323200 | -4.12583900 | -3.15171900 |
| H | -1.15037900 | -4.22819700 | -2.33219200 |
| H | -4.22213900 | -2.17100400 | -2.79572100 |
| H | -4.15018100 | -2.21908500 | -1.03164100 |
| H | -3.69749500 | -0.74015200 | -1.89930800 |
| C | -1.92090200 | -2.57538500 | 0.57950100  |
| C | -2.16761000 | -1.58537300 | 1.73561400  |
| H | -1.21932900 | -3.34767100 | 0.93749800  |
| H | -2.86071900 | -3.11175700 | 0.39894400  |
| C | -2.55673400 | -2.27342300 | 3.05059000  |
| H | -1.26786500 | -0.97665500 | 1.89763800  |
| H | -2.96597300 | -0.88353300 | 1.45121900  |
| C | -2.82997300 | -1.29069900 | 4.19452400  |
| H | -3.44705900 | -2.89747800 | 2.88441600  |
| H | -1.75495800 | -2.96520200 | 3.34646500  |
| H | -3.10275300 | -1.81367300 | 5.11880500  |
| H | -1.94656800 | -0.67579300 | 4.40819500  |
| H | -3.65219700 | -0.60877500 | 3.94321600  |
| C | -1.63011900 | 3.07305700  | -0.02219000 |
| C | -2.34772100 | 1.86914100  | -0.18159600 |
| C | -3.73169100 | 1.82891800  | 0.01207100  |
| C | -4.35921200 | 3.01995000  | 0.36545700  |
| C | -3.63624700 | 4.21930700  | 0.52222300  |
| C | -2.25782700 | 4.26894300  | 0.33148100  |
| C | -0.22568800 | 1.44409800  | -0.57542300 |
| H | -4.28883700 | 0.90653200  | -0.10933300 |
| H | -5.43329100 | 3.02619500  | 0.52457900  |
| H | -4.16628200 | 5.12584000  | 0.79846100  |
| H | -1.70270500 | 5.19362300  | 0.45390400  |
| H | 0.72080100  | 0.93156500  | -0.80772400 |
| N | -1.42979700 | 0.88580000  | -0.53381600 |
| N | -0.29605600 | 2.75926100  | -0.27916400 |
| C | 0.84307700  | 3.66787200  | -0.21852500 |
| H | 0.73988400  | 4.45565800  | -0.97096400 |
| H | 0.90591300  | 4.12165700  | 0.77499800  |
| H | 1.75366200  | 3.09753600  | -0.40995800 |

42

|   |             |             |             |
|---|-------------|-------------|-------------|
| C | 2.40612800  | 0.00281100  | -0.16136300 |
| C | 2.93643600  | 2.08764900  | -0.30186500 |
| C | 4.14065900  | 1.39493200  | -0.02699900 |
| C | 2.95727000  | 3.48069000  | -0.45724100 |
| C | 5.36720800  | 2.04868400  | 0.10800800  |
| C | 4.17665400  | 4.13905500  | -0.32788000 |
| H | 2.04205500  | 4.02101400  | -0.68206700 |
| C | 5.36435300  | 3.43395100  | -0.04842700 |
| H | 6.28603600  | 1.51285400  | 0.32862300  |
| H | 4.21809400  | 5.21841000  | -0.44578800 |
| H | 6.29803100  | 3.98088400  | 0.04859700  |
| C | 4.69285900  | -1.04025900 | 0.30229400  |
| H | 4.82075600  | -1.22446000 | 1.37604900  |
| H | 4.32503100  | -1.95031000 | -0.17468800 |
| H | 5.66794800  | -0.80261800 | -0.13159400 |
| N | 1.88154200  | 1.20049300  | -0.37219800 |
| C | 1.66726600  | -1.25485400 | -0.13636200 |
| C | 0.39948400  | -1.35808200 | -0.57347300 |
| H | -1.47443400 | -2.20275000 | -0.25030200 |
| H | 2.18070300  | -2.11710000 | 0.27902500  |
| C | -0.48958400 | -2.57853900 | -0.56879400 |
| H | -0.06188900 | -0.46293200 | -0.97800100 |
| N | 3.77951900  | 0.05938800  | 0.04944800  |
| C | -0.72597500 | -3.12500100 | -2.03682400 |
| C | -1.04640400 | -1.95279200 | -2.99067400 |
| C | 0.51721700  | -3.86935600 | -2.55917600 |
| C | -1.93957300 | -4.07809200 | -2.04236300 |
| H | -1.83288300 | -1.30633700 | -2.58422900 |

|   |             |             |             |
|---|-------------|-------------|-------------|
| H | -0.16605500 | -1.32794400 | -3.17577200 |
| H | -1.38414100 | -2.33949200 | -3.95997800 |
| H | 0.72570300  | -4.77805700 | -1.98259400 |
| H | 0.37037400  | -4.16999900 | -3.60386600 |
| H | 1.40668500  | -3.22950500 | -2.51904400 |
| H | -2.13416200 | -4.43565300 | -3.06085000 |
| H | -1.78612200 | -4.96091900 | -1.41299900 |
| H | -2.84374900 | -3.56554500 | -1.69141900 |
| C | -0.05343200 | -3.66121300 | 0.44205300  |
| C | -0.27702100 | -3.26321400 | 1.90969300  |
| H | 1.00293000  | -3.92209000 | 0.28976400  |
| H | -0.61134000 | -4.58547000 | 0.25165000  |
| C | 0.19000900  | -4.33323500 | 2.90552900  |
| H | 0.23838800  | -2.31769400 | 2.12363300  |
| H | -1.34752300 | -3.06585600 | 2.06673500  |
| C | -0.05658100 | -3.94447300 | 4.36729200  |
| H | -0.32169100 | -5.28192900 | 2.68810100  |
| H | 1.26222700  | -4.52705200 | 2.75483600  |
| H | 0.28926900  | -4.72537000 | 5.05454200  |
| H | 0.46911200  | -3.01645300 | 4.62439700  |
| H | -1.12439600 | -3.78121000 | 4.55817100  |
| C | -3.49321800 | 2.60422600  | 0.39324900  |
| C | -3.61060200 | 1.33443600  | -0.22480000 |
| C | -4.88048900 | 0.79164800  | -0.45713400 |
| C | -5.99281400 | 1.53145100  | -0.06565000 |
| C | -5.85700000 | 2.79298600  | 0.54866400  |
| C | -4.60398300 | 3.35313000  | 0.78958700  |
| C | -1.51412700 | 1.73970500  | -0.08265000 |
| H | -4.98115600 | -0.18020000 | -0.93125700 |
| H | -6.98887700 | 1.13175500  | -0.23566400 |
| H | -6.74879200 | 3.34102900  | 0.84038400  |
| H | -4.50364900 | 4.32596200  | 1.26279900  |
| H | -0.43023300 | 1.67776300  | -0.14560100 |
| N | -2.35105100 | 0.82226600  | -0.50851800 |
| N | -2.12992800 | 2.83905900  | 0.47204000  |
| C | -1.47790500 | 4.00666400  | 1.03008200  |
| H | -1.75920700 | 4.91208100  | 0.47987900  |
| H | -1.74854400 | 4.13677600  | 2.08416300  |
| H | -0.39609700 | 3.87252200  | 0.96029200  |

Cartesian coordinates for the stationary points given in Fig. S5.

TS<sub>1h-43</sub>

|   |             |             |             |
|---|-------------|-------------|-------------|
| C | -1.33377600 | -0.66252900 | -0.02245500 |
| C | -2.63944900 | -2.58570500 | 0.31211100  |
| C | -3.34982700 | -1.76914000 | -0.50404700 |
| N | -2.57470900 | -0.61149200 | -0.70986700 |
| N | -1.42870800 | -1.93353800 | 0.60521700  |
| C | -3.03265600 | 0.49910200  | -1.49839000 |
| C | -3.89186000 | 1.45458200  | -0.90615000 |
| C | -2.65993200 | 0.58883900  | -2.85924200 |
| C | -4.37696100 | 2.50132100  | -1.70565900 |
| C | -3.16830600 | 1.65495600  | -3.61810400 |
| C | -4.02074600 | 2.60354200  | -3.05116300 |
| H | -5.03233000 | 3.24760200  | -1.26567700 |
| H | -2.88630800 | 1.74426800  | -4.66276800 |
| H | -4.40189400 | 3.42283800  | -3.65459200 |
| C | -0.45106900 | -2.46751200 | 1.51938500  |
| C | 0.60304300  | -3.27207300 | 1.02406900  |
| C | -0.59895600 | -2.21052100 | 2.90196900  |
| C | 1.49529900  | -3.83214300 | 1.95102200  |
| C | 0.31993700  | -2.79312300 | 3.78921200  |
| C | 1.35609700  | -3.60041100 | 3.32074400  |
| H | 2.31817800  | -4.44135800 | 1.59520300  |
| H | 0.22840500  | -2.59984100 | 4.85408100  |
| H | 2.06310300  | -4.03921500 | 4.01952000  |
| C | -1.72384900 | -0.42740300 | -3.50970200 |
| H | -1.43315600 | -1.14703100 | -2.73940500 |
| C | -2.42988700 | -1.20485600 | -4.64493600 |
| H | -3.32388600 | -1.72262700 | -4.27631000 |
| H | -2.73990900 | -0.53472600 | -5.45723000 |
| H | -1.75091000 | -1.95458500 | -5.06997100 |
| C | -0.42671800 | 0.24659700  | -4.00976300 |
| H | -0.63459400 | 0.99263700  | -4.78812800 |
| H | 0.08502200  | 0.73974100  | -3.17688400 |

|    |             |             |             |
|----|-------------|-------------|-------------|
| H  | 0.25449800  | -0.50271500 | -4.43056300 |
| C  | 0.75697900  | -3.55028400 | -0.47101700 |
| H  | 0.28102000  | -2.71788200 | -1.00115400 |
| C  | 2.22732300  | -3.60656700 | -0.93543100 |
| H  | 2.25598800  | -3.73389200 | -2.02546600 |
| H  | 2.77856000  | -2.68997200 | -0.69427000 |
| H  | 2.76000700  | -4.46338200 | -0.50036400 |
| C  | 0.01645600  | -4.85474000 | -0.86301700 |
| H  | 0.45082000  | -5.71792400 | -0.34094500 |
| H  | -1.04916700 | -4.80542300 | -0.61252400 |
| H  | 0.10395700  | -5.03217100 | -1.94263100 |
| C  | -1.69908700 | -1.29923600 | 3.44414900  |
| H  | -2.30969800 | -0.97555900 | 2.59619400  |
| C  | -1.09814100 | -0.02446900 | 4.07955500  |
| H  | -0.46232500 | -0.26799900 | 4.94047400  |
| H  | -0.49316100 | 0.51286000  | 3.34164800  |
| H  | -1.89756100 | 0.64356100  | 4.42612000  |
| C  | -2.62605900 | -2.03932400 | 4.43561700  |
| H  | -3.08335200 | -2.92054200 | 3.96937900  |
| H  | -2.07609600 | -2.37664100 | 5.32336100  |
| H  | -3.43117800 | -1.37464300 | 4.77445700  |
| C  | -4.28242700 | 1.38425800  | 0.56952200  |
| H  | -3.79133900 | 0.50655500  | 0.99939700  |
| C  | -3.76883300 | 2.61755000  | 1.34624000  |
| H  | -2.68029600 | 2.69264800  | 1.25923000  |
| H  | -4.21282500 | 3.54628700  | 0.96540200  |
| H  | -4.02386100 | 2.53202800  | 2.41037000  |
| C  | -5.80775600 | 1.20555100  | 0.75057400  |
| H  | -6.36183600 | 2.06232700  | 0.34627900  |
| H  | -6.16423400 | 0.30366300  | 0.23884500  |
| H  | -6.05838600 | 1.11635800  | 1.81526800  |
| Ni | 0.02517900  | 0.47857700  | 0.07567600  |
| C  | 2.93346500  | 3.12634100  | 1.34411200  |
| C  | 1.59549200  | 2.83230800  | 0.98697000  |
| C  | 0.57885800  | 3.73860200  | 1.30615900  |
| C  | 0.92211700  | 4.90992500  | 1.98277500  |
| C  | 2.25530800  | 5.18533400  | 2.34090900  |
| C  | 3.28312800  | 4.29409300  | 2.02519000  |
| C  | 2.82837000  | 1.13840700  | 0.26151300  |
| H  | -0.44663600 | 3.52092100  | 1.02269200  |
| H  | 0.14461000  | 5.62681500  | 2.23843400  |
| H  | 2.48963600  | 6.10734700  | 2.86892100  |
| H  | 4.31448300  | 4.50542000  | 2.29755000  |
| H  | 3.48284600  | 0.10778400  | -0.40677000 |
| N  | 1.56385800  | 1.60085400  | 0.33453000  |
| N  | 3.66874400  | 2.05382500  | 0.87671500  |
| C  | 5.09254900  | 1.84715600  | 1.04955000  |
| H  | 5.67035000  | 2.64802000  | 0.56928300  |
| H  | 5.35425100  | 1.82155100  | 2.11603800  |
| H  | 5.33808900  | 0.88957800  | 0.58308600  |
| H  | -4.31743800 | -1.89677600 | -0.95944000 |
| H  | -2.87605200 | -3.55700700 | 0.71243200  |
| O  | 4.28066900  | -0.70157700 | -0.87601000 |
| C  | 4.62240900  | -0.51186500 | -2.21613900 |
| C  | 5.51822900  | -1.69400500 | -2.64772800 |
| C  | 3.36561100  | -0.46819600 | -3.11897700 |
| C  | 5.41679900  | 0.80695500  | -2.41496500 |
| H  | 6.39771700  | -1.74599500 | -1.99402100 |
| H  | 4.96838900  | -2.63654400 | -2.54204600 |
| H  | 5.86100600  | -1.60525600 | -3.68944100 |
| H  | 2.71283200  | 0.35854800  | -2.81799100 |
| H  | 3.61764000  | -0.33980500 | -4.18242400 |
| H  | 2.79463000  | -1.39651700 | -3.00807300 |
| H  | 5.71088100  | 0.96517200  | -3.46306100 |
| H  | 4.81126300  | 1.66561600  | -2.10101400 |
| H  | 6.32855000  | 0.79287400  | -1.80427200 |

|    |             |             |             |
|----|-------------|-------------|-------------|
| C  | 3.85549000  | -3.56796200 | -1.35908500 |
| H  | 5.38052900  | -2.55565500 | -0.23139500 |
| H  | 2.18130900  | -4.32443000 | -2.47391300 |
| H  | 4.37237100  | -4.52378700 | -1.34322800 |
| C  | -0.35801700 | 2.84247900  | -0.60391400 |
| C  | -1.58780300 | 2.97099000  | -1.29558400 |
| C  | -0.08272100 | 3.61048400  | 0.55286500  |
| C  | -2.52810900 | 3.89897500  | -0.81888500 |
| C  | -1.06085100 | 4.51330800  | 0.99979500  |
| C  | -2.27145200 | 4.66336400  | 0.32049600  |
| H  | -3.47414900 | 4.01385200  | -1.34002600 |
| H  | -0.86806100 | 5.10731700  | 1.88823300  |
| H  | -3.01337900 | 5.37149000  | 0.67984400  |
| C  | 0.60136000  | -2.11168200 | -2.77755400 |
| H  | 0.12383700  | -1.18853700 | -2.43613600 |
| C  | 0.84179300  | -1.99430700 | -4.30350000 |
| H  | 1.46999500  | -1.12821400 | -4.54375500 |
| H  | 1.33904400  | -2.89319500 | -4.69222700 |
| H  | -0.11358900 | -1.88020000 | -4.83150600 |
| C  | -0.37237600 | -3.26446600 | -2.45664600 |
| H  | 0.01857800  | -4.23726900 | -2.78462600 |
| H  | -0.58809300 | -3.30111200 | -1.38419100 |
| H  | -1.32270800 | -3.09938400 | -2.98006800 |
| C  | -1.90745500 | 2.13154100  | -2.53307300 |
| H  | -1.10437500 | 1.39803800  | -2.64873300 |
| C  | -3.22443700 | 1.33946100  | -2.37509800 |
| H  | -3.39616500 | 0.71304000  | -3.25939300 |
| H  | -3.18203100 | 0.68329800  | -1.50119800 |
| H  | -4.09015000 | 2.00566300  | -2.26693600 |
| C  | -1.93976100 | 3.00360000  | -3.81122100 |
| H  | -2.72984100 | 3.76352500  | -3.75106300 |
| H  | -0.98567400 | 3.52175300  | -3.96381600 |
| H  | -2.13556400 | 2.38203600  | -4.69417600 |
| C  | 1.24745100  | 3.50402100  | 1.29710500  |
| H  | 1.84108900  | 2.73419800  | 0.79662100  |
| C  | 1.05790400  | 3.04420000  | 2.76037600  |
| H  | 0.42610600  | 3.74382600  | 3.32421000  |
| H  | 0.60636700  | 2.04680900  | 2.79801700  |
| H  | 2.03168600  | 2.99289100  | 3.26502900  |
| C  | 2.03279500  | 4.83565800  | 1.22295800  |
| H  | 2.20356400  | 5.13918200  | 0.18275700  |
| H  | 1.49278000  | 5.64820400  | 1.72641700  |
| H  | 3.00886400  | 4.72828000  | 1.71322200  |
| C  | 4.40910900  | -0.00632800 | -0.05408500 |
| H  | 3.64402900  | 0.77386100  | 0.00500900  |
| C  | 4.85880200  | -0.31591800 | 1.39003600  |
| H  | 5.23374500  | 0.59613600  | 1.87159800  |
| H  | 4.02163200  | -0.69585000 | 1.98302900  |
| H  | 5.66505000  | -1.06016100 | 1.41636000  |
| C  | 5.59015000  | 0.54625700  | -0.88830700 |
| H  | 6.38235000  | -0.20663100 | -0.99437300 |
| H  | 5.26279800  | 0.83589800  | -1.89319800 |
| H  | 6.02466800  | 1.43022100  | -0.40359000 |
| Ni | 0.08483600  | -0.17341900 | 0.79260700  |
| C  | -3.91554900 | -1.34595600 | 0.63185100  |
| C  | -3.24466400 | -2.54766800 | 0.26624400  |
| C  | -3.97676400 | -3.58501700 | -0.33055700 |
| C  | -5.34385200 | -3.40364400 | -0.54524000 |
| C  | -5.99044500 | -2.20851100 | -0.17662200 |
| C  | -5.28394300 | -1.15943500 | 0.41861500  |
| C  | -1.71476900 | -1.25010600 | 1.13093500  |
| H  | -3.47814400 | -4.50902900 | -0.61271900 |
| H  | -5.92475600 | -4.20021100 | -1.00637700 |
| H  | -7.05790600 | -2.09899100 | -0.35719200 |
| H  | -5.78466800 | -0.23690600 | 0.70355600  |
| N  | -1.91036900 | -2.46675100 | 0.59914900  |
| N  | -2.93640500 | -0.55171700 | 1.18046500  |
| C  | -3.13054800 | 0.75979500  | 1.75845900  |
| H  | -2.15614200 | 1.14082900  | 2.06920400  |
| H  | -3.55926100 | 1.45573700  | 1.02725400  |
| H  | -3.79605900 | 0.71027900  | 2.63177600  |
| H  | 2.93478000  | 0.93425500  | -3.22819200 |
| H  | 1.37689800  | 3.15816500  | -2.75607700 |
| H  | -0.85168800 | -1.00677800 | 2.14983500  |
| O  | -0.05832800 | -0.54825100 | 3.02706000  |
| C  | 0.65364300  | -1.48693400 | 3.79978400  |
| C  | -0.29334500 | -2.07611300 | 4.86963200  |
| C  | 1.21016400  | -2.62920800 | 2.92254700  |
| C  | 1.81490900  | -0.74976700 | 4.49517400  |
| H  | -0.71586300 | -1.26775400 | 5.47848100  |

## TS<sub>1h</sub>-

|   |            |             |             |
|---|------------|-------------|-------------|
| C | 0.87232000 | 0.63057900  | -0.57628100 |
| C | 1.43009200 | 2.21618300  | -2.23622600 |
| C | 2.19737000 | 1.12425500  | -2.46626500 |
| N | 1.87871700 | 0.16791100  | -1.48266100 |
| N | 0.63287800 | 1.93933300  | -1.10867200 |
| C | 2.52421400 | -1.11165400 | -1.40267700 |
| C | 3.76862700 | -1.21467400 | -0.73662900 |
| C | 1.93055000 | -2.23079100 | -2.03320500 |
| C | 4.42289700 | -2.45697900 | -0.73360200 |
| C | 2.61996300 | -3.45326700 | -1.99853700 |

|   |             |             |            |
|---|-------------|-------------|------------|
| H | -1.12269300 | -2.60438900 | 4.38491600 |
| H | 0.22119300  | -2.78245300 | 5.53734200 |
| H | 1.87576300  | -2.21965300 | 2.15413700 |
| H | 1.76947400  | -3.36521400 | 3.51874100 |
| H | 0.39421900  | -3.14800100 | 2.40685400 |
| H | 2.42460800  | -1.42562200 | 5.11212200 |
| H | 2.46233700  | -0.28499200 | 3.74326300 |
| H | 1.42230000  | 0.04733900  | 5.13835400 |

### 43

|    |             |             |             |
|----|-------------|-------------|-------------|
| C  | 1.30187400  | -0.69294100 | 0.13911300  |
| C  | 2.66121100  | -2.61176400 | 0.11820800  |
| C  | 3.32779000  | -1.67004200 | 0.82958800  |
| N  | 2.52190600  | -0.51513000 | 0.84853700  |
| N  | 1.44537800  | -2.03973600 | -0.29834900 |
| C  | 2.93485700  | 0.71082000  | 1.47294000  |
| C  | 3.82141000  | 1.56985300  | 0.78070000  |
| C  | 2.49609600  | 1.01036800  | 2.78351800  |
| C  | 4.27473000  | 2.72727400  | 1.43286900  |
| C  | 2.97278900  | 2.18172100  | 3.39265500  |
| C  | 3.85735500  | 3.03337600  | 2.72883600  |
| H  | 4.95364000  | 3.39850800  | 0.91506700  |
| H  | 2.64151700  | 2.42978100  | 4.39645400  |
| H  | 4.21466600  | 3.93576300  | 3.21741800  |
| C  | 0.52003000  | -2.71713100 | -1.16870500 |
| C  | -0.52801100 | -3.48802300 | -0.61121900 |
| C  | 0.71081100  | -2.63319900 | -2.56739000 |
| C  | -1.36690500 | -4.19412400 | -1.48669800 |
| C  | -0.15517500 | -3.35687900 | -3.40222500 |
| C  | -1.18263000 | -4.13484700 | -2.86933500 |
| H  | -2.18350800 | -4.78261600 | -1.08360600 |
| H  | -0.02939700 | -3.29787200 | -4.47937000 |
| H  | -1.84821900 | -4.68435700 | -3.52944400 |
| C  | 1.52899100  | 0.10097800  | 3.53798500  |
| H  | 1.23614200  | -0.70270500 | 2.85685100  |
| C  | 2.20281800  | -0.53968600 | 4.77402000  |
| H  | 3.09451800  | -1.11092500 | 4.48847700  |
| H  | 2.50960000  | 0.22279700  | 5.50197500  |
| H  | 1.50572200  | -1.22228100 | 5.27633200  |
| C  | 0.23603200  | 0.85142900  | 3.92631600  |
| H  | 0.43883200  | 1.68025100  | 4.61747100  |
| H  | -0.24735900 | 1.25154700  | 3.02908500  |
| H  | -0.46754500 | 0.16720200  | 4.41619100  |
| C  | -0.73366600 | -3.56826600 | 0.90097900  |
| H  | -0.29591100 | -2.65983300 | 1.32901700  |
| C  | -2.22078000 | -3.59832000 | 1.31085900  |
| H  | -2.29726500 | -3.55638300 | 2.40509700  |
| H  | -2.77793800 | -2.74890800 | 0.90223100  |
| H  | -2.71377600 | -4.52610900 | 0.99041500  |
| C  | 0.01426500  | -4.78804500 | 1.49672800  |
| H  | -0.37736100 | -5.72496400 | 1.07820400  |
| H  | 1.08868100  | -4.74353200 | 1.28704700  |
| H  | -0.11807900 | -4.82159000 | 2.58601500  |
| C  | 1.80024600  | -1.75762500 | -3.18499800 |
| H  | 2.36488700  | -1.30509000 | -2.36484000 |
| C  | 1.18241700  | -0.59833700 | -4.00050000 |
| H  | 0.59441900  | -0.97415100 | -4.84786800 |
| H  | 0.52816500  | 0.00398100  | -3.36114300 |
| H  | 1.97245500  | 0.05222500  | -4.39799900 |
| C  | 2.79011400  | -2.58315200 | -4.03851800 |
| H  | 3.26539800  | -3.37176100 | -3.44249200 |
| H  | 2.28632400  | -3.06184000 | -4.88789800 |
| H  | 3.57937300  | -1.93492500 | -4.44049500 |
| C  | 4.27864500  | 1.27578000  | -0.64790300 |
| H  | 3.76586600  | 0.36766900  | -0.97720000 |
| C  | 3.86718900  | 2.40458600  | -1.61972100 |
| H  | 2.78143900  | 2.54204800  | -1.60585600 |
| H  | 4.34119000  | 3.35867800  | -1.35578600 |
| H  | 4.16724700  | 2.15199900  | -2.64480200 |
| C  | 5.80073200  | 1.00922200  | -0.71474100 |
| H  | 6.37363100  | 1.88839500  | -0.39275700 |
| H  | 6.08370000  | 0.16931900  | -0.06911100 |
| H  | 6.10332600  | 0.76779000  | -1.74170000 |
| Ni | -0.05222600 | 0.41341000  | -0.15772100 |
| C  | -2.78699100 | 3.09744200  | -1.71341000 |
| C  | -1.48891100 | 2.77340800  | -1.25113800 |
| C  | -0.43193800 | 3.66021400  | -1.48209000 |
| C  | -0.69347300 | 4.84209800  | -2.17884400 |

|   |             |             |             |
|---|-------------|-------------|-------------|
| C | -1.98605200 | 5.14669800  | -2.64333600 |
| C | -3.05433000 | 4.27432800  | -2.41519400 |
| C | -2.82028800 | 1.08545000  | -0.61836600 |
| H | 0.56204400  | 3.42133900  | -1.11424400 |
| H | 0.11751600  | 5.54350400  | -2.36530100 |
| H | -2.15825400 | 6.07510300  | -3.18444600 |
| H | -4.05539700 | 4.50925800  | -2.77039000 |
| H | -3.79931700 | -0.15557100 | 0.28343400  |
| N | -1.54072400 | 1.54110500  | -0.60293400 |
| N | -3.57781800 | 2.03853300  | -1.30595000 |
| C | -4.98652000 | 1.89039800  | -1.59118300 |
| H | -5.57048500 | 2.72498600  | -1.17803900 |
| H | -5.17016500 | 1.84750700  | -2.67423600 |
| H | -5.31991400 | 0.95794700  | -1.13155100 |
| H | 4.28340100  | -1.70759500 | 1.32506000  |
| H | 2.93238900  | -3.62285900 | -0.13482100 |
| O | -4.48599000 | -0.77176800 | 0.73427500  |
| C | -4.79170300 | -0.30258600 | 2.03653700  |
| C | -5.72405100 | -1.35454400 | 2.65722400  |
| C | -3.51181600 | -0.15952900 | 2.88375500  |
| C | -5.51934300 | 1.05817400  | 1.96953200  |
| H | -6.62110200 | -1.47306800 | 2.03776600  |
| H | -5.21732200 | -2.32498000 | 2.70516200  |
| H | -6.03419300 | -1.07106900 | 3.67170100  |
| H | -2.81821600 | 0.53988900  | 2.40620200  |
| H | -3.73479000 | 0.20387300  | 3.89687000  |
| H | -3.00346900 | -1.12597800 | 2.96703900  |
| H | -5.80675900 | 1.41432900  | 2.96854200  |
| H | -4.87076500 | 1.81235100  | 1.51137200  |
| H | -6.42742100 | 0.97073200  | 1.36067100  |

### TS<sub>43-44</sub>

|   |             |             |             |
|---|-------------|-------------|-------------|
| C | -0.18480300 | -1.36841900 | 0.03499600  |
| C | -0.01756200 | -3.64504200 | -0.56384600 |
| C | -1.27736000 | -3.45573900 | -0.10240100 |
| N | -1.39440100 | -2.09874000 | 0.25593000  |
| N | 0.64665100  | -2.40624800 | -0.49097100 |
| C | -2.61700200 | -1.51964300 | 0.73325100  |
| C | -2.81179700 | -1.34512300 | 2.12346500  |
| C | -3.62562700 | -1.17644200 | -0.19936600 |
| C | -4.04799700 | -0.84774000 | 2.56511500  |
| C | -4.84967000 | -0.69360300 | 0.29100200  |
| C | -5.06349300 | -0.53196500 | 1.66089800  |
| H | -4.21401200 | -0.70572100 | 3.62902000  |
| H | -5.63698300 | -0.43168500 | 0.29100200  |
| H | -6.01517700 | -0.15127700 | 2.02192300  |
| C | 1.99844500  | -2.21334100 | -0.93075200 |
| C | 2.24496200  | -1.89740500 | -2.28741400 |
| C | 3.05998800  | -2.37953100 | -0.01118500 |
| C | 3.57748200  | -1.77376200 | -2.71182500 |
| C | 4.37613100  | -2.25104400 | -0.48210600 |
| C | 4.63652200  | -1.95355400 | -1.82082700 |
| H | 3.78501300  | -1.52457700 | -3.74847800 |
| H | 5.20350800  | -2.37395600 | 0.21039100  |
| H | 5.66191700  | -1.85239300 | -2.16619300 |
| C | -3.41155600 | -1.32560300 | -1.70555600 |
| H | -2.35223200 | -1.55039600 | -1.86193300 |
| C | -4.23649100 | -2.50628200 | -2.27343600 |
| H | -3.97821700 | -3.44932200 | -1.77736100 |
| H | -5.31248600 | -2.33570000 | -2.13605400 |
| H | -4.04783500 | -2.62345800 | -3.34839400 |
| C | -3.71839400 | -0.02053600 | -2.47419100 |
| H | -4.77848500 | 0.25604200  | -2.39201200 |
| H | -3.11272800 | 0.81442400  | -2.10633800 |
| H | -3.49751300 | -0.15801800 | -3.54111900 |
| C | 1.10532900  | -1.65879200 | -3.27598400 |
| H | 0.16725100  | -1.85751100 | -2.74974900 |
| C | 1.06443900  | -0.18041400 | -3.72764500 |
| H | 0.22243400  | -0.01414400 | -4.41187900 |
| H | 0.93417000  | 0.47371000  | -2.85936400 |
| H | 1.98847300  | 0.10314300  | -4.24911300 |
| C | 1.17874800  | -2.61589800 | -4.48795900 |
| H | 2.09137600  | -2.45254000 | -5.07550400 |
| H | 1.16847800  | -3.66487800 | -4.16741800 |
| H | 0.32105200  | -2.45249600 | -5.15266600 |
| C | 2.80204400  | -2.68628100 | 1.46239200  |
| H | 1.72093400  | -2.63650400 | 1.62012100  |
| C | 3.44190200  | -1.62415400 | 2.38371600  |

|    |             |             |             |
|----|-------------|-------------|-------------|
| H  | 4.53700700  | -1.62429600 | 2.30510200  |
| H  | 3.07513400  | -0.62628800 | 2.12461600  |
| H  | 3.18117900  | -1.82690400 | 3.43070200  |
| C  | 3.27589900  | -4.11087700 | 1.83539400  |
| H  | 2.77591700  | -4.86860000 | 1.22006800  |
| H  | 4.35886100  | -4.22043000 | 1.69111900  |
| H  | 3.05312900  | -4.32480000 | 2.88868700  |
| C  | -1.72357800 | -1.68994200 | 3.13869600  |
| H  | -0.83999900 | -2.00415900 | 2.57606900  |
| C  | -1.30849700 | -0.45353300 | 3.96739200  |
| H  | -0.92636000 | 0.33115500  | 3.30603200  |
| H  | -2.15084300 | -0.05268900 | 4.54683700  |
| H  | -0.51208200 | -0.72358100 | 4.67324200  |
| C  | -2.15472200 | -2.86182400 | 4.05145300  |
| H  | -3.03626400 | -2.59924800 | 4.65096400  |
| H  | -2.40209100 | -3.75335100 | 3.46227700  |
| H  | -1.34412500 | -3.12324300 | 4.74378200  |
| Ni | 0.20606900  | 0.33722500  | 0.34420700  |
| C  | 2.57177800  | 3.33992100  | 0.32517700  |
| C  | 2.16517600  | 2.57961700  | 1.45404400  |
| C  | 2.97877800  | 2.53780200  | 2.59069600  |
| C  | 4.18005300  | 3.25210600  | 2.57924300  |
| C  | 4.56983500  | 4.00319500  | 1.45635400  |
| C  | 3.76904800  | 4.05850200  | 0.31070300  |
| C  | 0.55471000  | 2.35492500  | -0.06708800 |
| H  | 2.67268100  | 1.95933600  | 3.45890100  |
| H  | 4.82673500  | 3.22884700  | 3.45429900  |
| H  | 5.51164200  | 4.54816900  | 1.47642000  |
| H  | 4.07796800  | 4.63382200  | -0.55931700 |
| H  | -1.13324000 | 2.61243800  | -0.99074700 |
| N  | 0.92425300  | 2.01580300  | 1.19082300  |
| N  | 1.56041900  | 3.17514700  | -0.60227700 |
| C  | 1.54092500  | 3.73694300  | -1.93333200 |
| H  | 1.74854700  | 4.81561100  | -1.90537500 |
| H  | 2.28508500  | 3.25968800  | -2.58664300 |
| H  | 0.54285000  | 3.57985500  | -2.34823400 |
| H  | -2.09327400 | -4.14959800 | 0.01315800  |
| H  | 0.46830700  | -4.53332100 | -0.93219200 |
| O  | -1.88978300 | 2.96011200  | -1.55687100 |
| C  | -2.66268700 | 3.88339200  | -0.79603200 |
| C  | -3.86429000 | 4.24871300  | -1.67873700 |
| C  | -3.13621100 | 3.23411200  | 0.51705700  |
| C  | -1.83162300 | 5.14685400  | -0.49244400 |
| H  | -3.51915600 | 4.67323400  | -2.62899000 |
| H  | -4.45590100 | 3.35412400  | -1.90259800 |
| H  | -4.51358300 | 4.98236400  | -1.18393600 |
| H  | -2.27475200 | 2.92592500  | 1.11887800  |
| H  | -3.74756000 | 3.92802200  | 1.11091700  |
| H  | -3.73127000 | 2.33903800  | 0.30680500  |
| H  | -2.41978000 | 5.89514900  | 0.05641100  |
| H  | -0.95538000 | 4.88757600  | 0.11071800  |
| H  | -1.48145600 | 5.60093000  | -1.42732900 |

#### 44

|   |             |             |             |
|---|-------------|-------------|-------------|
| C | -1.14844100 | 0.20683400  | -0.15767800 |
| C | -3.32143000 | 0.04507200  | -1.04246500 |
| C | -3.01454500 | 1.36516200  | -0.99406300 |
| N | -1.71819500 | 1.47221200  | -0.45937200 |
| N | -2.21067100 | -0.65706200 | -0.53559000 |
| C | -1.06363300 | 2.73329300  | -0.23139700 |
| C | -1.34377700 | 3.44205600  | 0.96014900  |
| C | -0.19307400 | 3.25739400  | -1.21507300 |
| C | -0.76146300 | 4.70698900  | 1.13548700  |
| C | 0.36299400  | 4.52743200  | -0.99546400 |
| C | 0.07941400  | 5.25102400  | 0.16379400  |
| H | -0.95653200 | 5.26326800  | 2.04787100  |
| H | 1.03792700  | 4.94499700  | -1.73566400 |
| H | 0.52502300  | 6.23031600  | 0.31626800  |
| C | -2.16758100 | -2.08896200 | -0.42923300 |
| C | -1.67378200 | -2.85097800 | -1.51339600 |
| C | -2.65595000 | -2.70863000 | 0.74481600  |
| C | -1.68393300 | -4.25030800 | -1.40076200 |
| C | -2.64302100 | -4.11060700 | 0.81270000  |
| C | -2.16386800 | -4.87822100 | -0.25030200 |
| H | -1.29978000 | -4.85170500 | -2.21934000 |
| H | -3.00388200 | -4.60425500 | 1.71024500  |
| H | -2.15872200 | -5.96257600 | -0.17964600 |
| C | 0.14524600  | 2.48731300  | -2.49013700 |

|    |             |             |             |
|----|-------------|-------------|-------------|
| H  | -0.24388300 | 1.47190400  | -2.37072000 |
| C  | -0.54428200 | 3.12584100  | -3.72056300 |
| H  | -1.63364900 | 3.16321100  | -3.59485000 |
| H  | -0.18803600 | 4.15159800  | -3.88449400 |
| H  | -0.32409600 | 2.54424900  | -4.62497000 |
| C  | 1.67026000  | 2.35700200  | -2.70432600 |
| H  | 2.14260500  | 3.33741700  | -2.85545300 |
| H  | 2.15251700  | 1.85980100  | -1.85391700 |
| H  | 1.86473700  | 1.75641500  | -3.60297800 |
| C  | -1.11654900 | -2.19373500 | -2.77448400 |
| H  | -1.21699700 | -1.11140700 | -2.65340200 |
| C  | 0.39228000  | -2.48849800 | -2.93764700 |
| H  | 0.78239100  | -1.98514300 | -3.83146000 |
| H  | 0.94363100  | -2.11547200 | -2.06749500 |
| H  | 0.58226900  | -3.56477800 | -3.04423100 |
| C  | -1.91275700 | -2.60635400 | -4.03420300 |
| H  | -1.83629100 | -3.68503500 | -4.22230400 |
| H  | -2.97635100 | -2.35736600 | -3.93287000 |
| H  | -1.52202500 | -2.08509400 | -4.91715200 |
| C  | -3.14242100 | -1.88993200 | 1.93960100  |
| H  | -3.19451800 | -0.84400400 | 1.62228900  |
| C  | -2.12230700 | -1.96094500 | 3.10008000  |
| H  | -2.00541100 | -2.99131000 | 3.46140300  |
| H  | -1.14632600 | -1.59438500 | 2.76289700  |
| H  | -2.45490100 | -1.33946300 | 3.94182600  |
| C  | -4.55487100 | -2.30857600 | 2.40499300  |
| H  | -5.28153900 | -2.23625500 | 1.58666600  |
| H  | -4.56976400 | -3.34062400 | 2.77748600  |
| H  | -4.89237400 | -1.65760100 | 3.22140200  |
| C  | -2.20243600 | 2.83846500  | 2.07060100  |
| H  | -2.61534100 | 1.89722100  | 1.69529300  |
| C  | -1.33034600 | 2.49338900  | 3.30083100  |
| H  | -1.93663400 | 2.00872400  | 4.07767500  |
| H  | -0.52404500 | 1.81087400  | 3.01128100  |
| H  | -0.88094300 | 3.39681000  | 3.73322400  |
| C  | -3.38940600 | 3.74811300  | 2.45932100  |
| H  | -3.04601900 | 4.70561900  | 2.87085900  |
| H  | -4.02466300 | 3.96416000  | 1.59170400  |
| H  | -4.00799700 | 3.26060100  | 3.22370500  |
| Ni | 0.55313100  | -0.13732300 | 0.31903400  |
| C  | 4.49809200  | -1.21451200 | 1.03132200  |
| C  | 4.61252300  | -0.06548500 | 0.19720300  |
| C  | 5.88894800  | 0.38521400  | -0.16782000 |
| C  | 7.00941700  | -0.30649300 | 0.29990000  |
| C  | 6.87679800  | -1.43891700 | 1.12403400  |
| C  | 5.61366500  | -1.90903600 | 1.50247500  |
| C  | 2.44979800  | -0.37450300 | 0.48499200  |
| H  | 5.99222300  | 1.26125400  | -0.80448200 |
| H  | 8.00560600  | 0.03553700  | 0.02327300  |
| H  | 7.76806400  | -1.95729400 | 1.47344200  |
| H  | 5.51281500  | -2.78507500 | 2.14047200  |
| N  | 3.36096700  | 0.41968100  | -0.11316700 |
| N  | 3.14338800  | -1.38865500 | 1.19286000  |
| C  | 2.52572900  | -2.44229400 | 1.95791700  |
| H  | 1.44334300  | -2.34354100 | 1.83473600  |
| H  | 2.84000200  | -3.43384600 | 1.59964000  |
| H  | 2.77569000  | -2.36955200 | 3.02726900  |
| H  | -3.58639000 | 2.23090000  | -1.28343400 |
| H  | -4.20958400 | -0.45892800 | -1.38534000 |

#### TS44-45

|   |             |             |             |
|---|-------------|-------------|-------------|
| C | -0.93253000 | 0.88968600  | 0.72387900  |
| C | -2.21474700 | 2.82896700  | 1.06215000  |
| C | -2.66896400 | 1.90469800  | 1.93915700  |
| N | -1.91691600 | 0.72809500  | 1.73866600  |
| N | -1.17941400 | 2.23276900  | 0.31933100  |
| C | -2.25192500 | -0.50521300 | 2.40320900  |
| C | -3.32130700 | -1.28590400 | 1.89838200  |
| C | -1.55697300 | -0.87671400 | 3.57958100  |
| C | -3.68333100 | -2.44819600 | 2.60011900  |
| C | -1.95512500 | -2.04888700 | 4.24178800  |
| C | -3.00833900 | -2.82833500 | 3.75959200  |
| H | -4.49645400 | -3.06201700 | 2.22761300  |
| H | -1.43537300 | -2.35674000 | 5.14185500  |
| H | -3.30011700 | -3.73268200 | 4.28672100  |
| C | -0.56513000 | 2.89440700  | -0.80503700 |
| C | 0.62282300  | 3.63969800  | -0.61293000 |
| C | -1.20813000 | 2.83902700  | -2.06463500 |

|    |             |             |             |
|----|-------------|-------------|-------------|
| C  | 1.15384700  | 4.33272800  | -1.71198300 |
| C  | -0.63751700 | 3.55138300  | -3.13221500 |
| C  | 0.53188700  | 4.29016600  | -2.96088000 |
| H  | 2.06549200  | 4.90722900  | -1.59208900 |
| H  | -1.11363600 | 3.51952400  | -4.10660100 |
| H  | 0.96160200  | 4.83115400  | -3.79968900 |
| C  | -0.43291600 | -0.00504600 | 4.14062800  |
| H  | 0.06293200  | 0.46668300  | 3.28451500  |
| C  | -0.99879000 | 1.11719700  | 5.04744300  |
| H  | -0.18255400 | 1.74449500  | 5.42779700  |
| H  | -1.69314200 | 1.76216600  | 4.50043700  |
| H  | -1.53017900 | 0.68951900  | 5.90834100  |
| C  | 0.63354000  | -0.81026100 | 4.91039400  |
| H  | 0.24041000  | -1.21620900 | 5.85194100  |
| H  | 1.01613900  | -1.64136100 | 4.30883100  |
| H  | 1.47888600  | -0.16033800 | 5.16008400  |
| C  | 1.28662300  | 3.73367000  | 0.76071800  |
| H  | 1.03308300  | 2.81563200  | 1.30197800  |
| C  | 2.82482100  | 3.80936800  | 0.68067800  |
| H  | 3.25180800  | 3.77225300  | 1.68953200  |
| H  | 3.22566200  | 2.96468400  | 0.11203600  |
| H  | 3.16786600  | 4.74289100  | 0.21588700  |
| C  | 0.73436400  | 4.93929900  | 1.56231200  |
| H  | 1.19959800  | 4.98187400  | 2.55561200  |
| H  | 0.95130800  | 5.88265700  | 1.04352500  |
| H  | -0.34947500 | 4.86677200  | 1.70003900  |
| C  | -2.51640100 | 2.07668800  | -2.27414800 |
| H  | -2.64868600 | 1.41232100  | -1.41526600 |
| C  | -2.49090300 | 1.18306600  | -3.53205700 |
| H  | -2.38447200 | 1.77350300  | -4.45191700 |
| H  | -1.67504500 | 0.45621300  | -3.46309900 |
| H  | -3.43366800 | 0.62558300  | -3.60677800 |
| C  | -3.71796200 | 3.05402800  | -2.31165100 |
| H  | -3.78396000 | 3.64694900  | -1.39183500 |
| H  | -3.62994400 | 3.74924600  | -3.15702700 |
| H  | -4.65709700 | 2.49807800  | -2.42699500 |
| C  | -4.10401900 | -0.87396600 | 0.65030300  |
| H  | -3.48205100 | -0.16462800 | 0.09564600  |
| C  | -4.40584600 | -2.05600800 | -0.29495200 |
| H  | -3.49920000 | -2.60461400 | -0.56010800 |
| H  | -5.11986100 | -2.76182000 | 0.14989000  |
| H  | -4.85148000 | -1.68173400 | -1.22403700 |
| C  | -5.42352000 | -0.15739400 | 1.03550300  |
| H  | -6.07584500 | -0.83042500 | 1.60747900  |
| H  | -5.23889100 | 0.73506800  | 1.64203400  |
| H  | -5.96381000 | 0.15239300  | 0.13212100  |
| Ni | 0.41715500  | -0.16656400 | 0.12184800  |
| C  | -1.29721400 | -2.55765300 | -2.64517500 |
| C  | -1.17365900 | -3.46858100 | -1.55383100 |
| C  | -1.79453300 | -4.71512300 | -1.54220200 |
| C  | -2.56751100 | -5.06563500 | -2.66174300 |
| C  | -2.70418600 | -4.18296000 | -3.74352800 |
| C  | -2.07791500 | -2.93058200 | -3.74979400 |
| C  | -0.03004500 | -1.54241400 | -1.17251200 |
| H  | -1.69000000 | -5.39482100 | -0.69925100 |
| H  | -3.06592800 | -6.03247200 | -2.68620000 |
| H  | -3.31092100 | -4.47909800 | -4.59772800 |
| H  | -2.18521400 | -2.25307200 | -4.59340100 |
| N  | -0.36894800 | -2.82101300 | -0.64201600 |
| N  | -0.58287200 | -1.41430700 | -2.40102200 |
| C  | 0.03751500  | -3.35945200 | 0.63499500  |
| H  | 0.52020600  | -4.33961300 | 0.50529800  |
| H  | 0.74793800  | -2.66872700 | 1.09443000  |
| H  | -0.81835200 | -3.47959100 | 1.31283000  |
| H  | -3.44382500 | 1.96395300  | 2.68380800  |
| H  | -2.52359900 | 3.84604400  | 0.89119800  |
| C  | 2.32597200  | -0.56900600 | 0.12817500  |
| C  | 1.71841000  | -1.16559500 | -1.10708800 |
| C  | 3.63232500  | -0.71105700 | 0.43698600  |
| C  | 4.25115800  | -0.26156900 | 1.78292100  |
| C  | 3.25810500  | 0.53954700  | 2.63567400  |
| H  | 2.35372900  | -0.04069700 | 2.82112400  |
| H  | 3.71787000  | 0.81251900  | 3.59791700  |
| H  | 2.94548400  | 1.45189400  | 2.12412400  |
| C  | 5.50900700  | 0.61556400  | 1.56732900  |
| H  | 6.29393500  | 0.08728200  | 1.01347500  |
| H  | 5.25844400  | 1.52509800  | 1.00868500  |
| H  | 5.93974800  | 0.92141900  | 2.53187300  |
| C  | 4.66377800  | -1.51289400 | 2.60127400  |
| H  | 5.12598100  | -1.22461100 | 3.55707100  |

|   |            |             |             |
|---|------------|-------------|-------------|
| H | 3.78399800 | -2.12910800 | 2.82105300  |
| H | 5.38498500 | -2.14016700 | 2.06398200  |
| C | 4.61095700 | -1.37958200 | -0.54066300 |
| H | 5.51908900 | -1.73108600 | -0.02950700 |
| H | 4.14765000 | -2.28240800 | -0.96685100 |
| C | 5.04253300 | -0.47645800 | -1.71514600 |
| H | 5.53495800 | 0.42477000  | -1.32350400 |
| H | 4.14580900 | -0.12716000 | -2.24256500 |
| C | 5.98101000 | -1.16999000 | -2.71268500 |
| H | 6.88021800 | -1.52199000 | -2.18436200 |
| H | 5.48893100 | -2.07129000 | -3.10649300 |
| C | 6.39843900 | -0.26826200 | -3.88036100 |
| H | 6.92233700 | 0.62674600  | -3.52017800 |
| H | 7.06727000 | -0.78805800 | -4.57855900 |
| H | 5.52238000 | 0.07112800  | -4.44705600 |
| H | 1.82242300 | -0.57713000 | -2.02383400 |
| H | 2.03084900 | -2.20067300 | -1.29941900 |

## ZTS<sub>44-45</sub>

|   |             |             |             |
|---|-------------|-------------|-------------|
| C | -0.92581100 | 0.89820000  | 0.48275300  |
| C | -2.29249600 | 2.76340700  | 0.90437900  |
| C | -2.61509800 | 1.83148300  | 1.82847900  |
| N | -1.81318100 | 0.69789600  | 1.58152000  |
| N | -1.28976400 | 2.21628600  | 0.08337800  |
| C | -1.99470200 | -0.51700600 | 2.32980200  |
| C | -3.17764400 | -1.27083800 | 2.12845700  |
| C | -1.03286500 | -0.89745800 | 3.30072200  |
| C | -3.38504900 | -2.41030500 | 2.92493900  |
| C | -1.28093700 | -2.05303900 | 4.05728200  |
| C | -2.44679400 | -2.80195000 | 3.87856500  |
| H | -4.28634600 | -2.99894300 | 2.78481000  |
| H | -0.55590800 | -2.36844200 | 4.79853600  |
| H | -2.61995800 | -3.68942800 | 4.48125200  |
| C | -0.66664600 | 2.98228900  | -0.96500900 |
| C | 0.27156600  | 3.97936000  | -0.60777800 |
| C | -1.05260500 | 2.77611700  | -2.31305200 |
| C | 0.83466900  | 4.76251600  | -1.62872500 |
| C | -0.44598800 | 3.57315600  | -3.29670500 |
| C | 0.48858000  | 4.55531900  | -2.96240700 |
| H | 1.55533500  | 5.53347800  | -1.37410400 |
| H | -0.70913300 | 3.42443200  | -4.33697300 |
| H | 0.94267100  | 5.15971800  | -3.74308000 |
| C | 0.21518200  | -0.04782600 | 3.54506500  |
| H | 0.54016300  | 0.32906200  | 2.56609100  |
| C | -0.10945200 | 1.16483400  | 4.45271700  |
| H | 0.78542300  | 1.78653700  | 4.58379800  |
| H | -0.89558500 | 1.79148800  | 4.01940300  |
| H | -0.44138600 | 0.83248100  | 5.44601900  |
| C | 1.39834200  | -0.84428600 | 4.12823000  |
| H | 1.20713300  | -1.18316000 | 5.15578300  |
| H | 1.63235800  | -1.71660900 | 3.50904300  |
| H | 2.28992000  | -0.20842200 | 4.15024900  |
| C | 0.64965200  | 4.25162900  | 0.84875700  |
| H | 0.26624600  | 3.42334500  | 1.45196200  |
| C | 2.17661000  | 4.29726200  | 1.06114800  |
| H | 2.40481400  | 4.41526900  | 2.12779700  |
| H | 2.63908100  | 3.37150300  | 0.71086800  |
| H | 2.63864800  | 5.13851100  | 0.52896100  |
| C | -0.00292500 | 5.56028200  | 1.35860100  |
| H | 0.25162300  | 5.73076200  | 2.41257000  |
| H | 0.35133800  | 6.42308900  | 0.77975000  |
| H | -1.09473000 | 5.52514000  | 1.27422300  |
| C | -2.14584800 | 1.77146600  | -2.68336300 |
| H | -2.02498000 | 0.90096900  | -2.03111600 |
| C | -2.04583500 | 1.25332500  | -4.13004200 |
| H | -2.23906500 | 2.04451100  | -4.86813100 |
| H | -1.06646400 | 0.80480100  | -4.31194200 |
| H | -2.79446800 | 0.46818700  | -4.28197600 |
| C | -3.55028000 | 2.38344500  | -2.44051200 |
| H | -3.68785500 | 2.68842200  | -1.39830700 |
| H | -3.70387700 | 3.26363400  | -3.07995400 |
| H | -4.32695700 | 1.64739600  | -2.68377200 |
| C | -4.23532100 | -0.87612600 | 1.09416600  |
| H | -3.81349400 | -0.07859800 | 0.47567600  |
| C | -4.60287100 | -2.04036200 | 0.14824600  |
| H | -3.72269200 | -2.43234400 | -0.36730200 |
| H | -5.08080500 | -2.86756200 | 0.68860300  |
| H | -5.31077100 | -1.69203700 | -0.61399000 |

|    |             |             |             |
|----|-------------|-------------|-------------|
| C  | -5.50952500 | -0.32457300 | 1.78057600  |
| H  | -5.97500100 | -1.09161400 | 2.41299800  |
| H  | -5.28681100 | 0.54183400  | 2.41312100  |
| H  | -6.24471400 | -0.01636000 | 1.02663800  |
| Ni | 0.42310600  | -0.14175600 | -0.15956700 |
| C  | -1.47786800 | -2.36807700 | -2.91952100 |
| C  | -1.53593300 | -3.26846400 | -1.81372900 |
| C  | -2.32655600 | -4.41483600 | -1.81942900 |
| C  | -3.09703600 | -4.66717200 | -2.96710800 |
| C  | -3.05893900 | -3.79203100 | -4.06203800 |
| C  | -2.25634600 | -2.64428800 | -4.05407900 |
| C  | -0.12140600 | -1.53601500 | -1.41123300 |
| H  | -2.35034300 | -5.09361300 | -0.96958900 |
| H  | -3.72702300 | -5.55344300 | -3.00414800 |
| H  | -3.66401500 | -4.01219300 | -4.94002100 |
| H  | -2.22002000 | -1.97915900 | -4.91308300 |
| N  | -0.68476600 | -2.73042000 | -0.87333500 |
| N  | -0.60085500 | -1.34680800 | -2.66289500 |
| C  | -0.34816700 | -3.34486000 | 0.38832300  |
| H  | -1.24608100 | -3.53170800 | 0.98979100  |
| H  | 0.17744000  | -4.30120400 | 0.23873000  |
| H  | 0.30023500  | -2.66625200 | 0.94571100  |
| H  | -3.32865600 | 1.85690400  | 2.63371300  |
| H  | -2.67309500 | 3.75805800  | 0.74824000  |
| C  | 2.28821800  | -0.67707500 | -0.15896100 |
| C  | 1.63344200  | -1.44175300 | -1.26414100 |
| C  | 3.56666100  | -0.72163200 | 0.27293000  |
| C  | 4.71232000  | -1.60925000 | -0.32516200 |
| C  | 4.25100800  | -3.04738400 | -0.66830100 |
| H  | 3.62064800  | -3.08484300 | -1.55881600 |
| H  | 5.12490500  | -3.68331400 | -0.87028100 |
| H  | 3.69333000  | -3.49353600 | 0.16337300  |
| C  | 5.89738900  | -1.78802700 | 0.65698500  |
| H  | 6.36059600  | -0.84240400 | 0.95194200  |
| H  | 5.57845500  | -2.30340400 | 1.57172800  |
| H  | 6.67913300  | -2.40189200 | 0.18809600  |
| C  | 5.24630300  | -0.96256800 | -1.62766900 |
| H  | 6.02283500  | -1.58891400 | -2.09410000 |
| H  | 4.43343600  | -0.83440400 | -2.35048300 |
| H  | 5.68082700  | 0.02522700  | -1.43936200 |
| C  | 3.96494700  | 0.23497300  | 1.39960100  |
| H  | 3.03141400  | 0.62738800  | 1.81551100  |
| H  | 4.47944100  | -0.29477200 | 2.21868900  |
| C  | 4.83909900  | 1.44097300  | 0.99207000  |
| H  | 4.29515500  | 2.02501300  | 0.23700300  |
| H  | 5.76463500  | 1.10881600  | 0.50281200  |
| C  | 5.21668500  | 2.33922500  | 2.17851800  |
| H  | 4.30105400  | 2.67844200  | 2.68252900  |
| H  | 5.76672500  | 1.74150300  | 2.92096600  |
| C  | 6.06041700  | 3.55612900  | 1.78086200  |
| H  | 5.52038800  | 4.19394400  | 1.07009100  |
| H  | 6.32197900  | 4.17295500  | 2.65052600  |
| H  | 6.99686400  | 3.24708800  | 1.29810800  |
| H  | 1.88106000  | -1.06787700 | -2.26286100 |
| H  | 1.77475100  | -2.52427900 | -1.22666900 |

45

|   |             |             |             |
|---|-------------|-------------|-------------|
| C | -1.87102500 | 0.79566600  | 0.23439600  |
| C | -3.34889100 | 2.52539800  | 0.86213500  |
| C | -4.04896300 | 1.36841900  | 0.93781400  |
| N | -3.17995900 | 0.32811100  | 0.55968800  |
| N | -2.04586400 | 2.19743900  | 0.43898300  |
| C | -3.60397100 | -1.04298000 | 0.49186100  |
| C | -4.29865100 | -1.49086900 | -0.65722700 |
| C | -3.37691600 | -1.90045200 | 1.59359200  |
| C | -4.77900000 | -2.80966800 | -0.67478000 |
| C | -3.86799800 | -3.21366900 | 1.52562000  |
| C | -4.56744800 | -3.66675700 | 0.40592800  |
| H | -5.31396100 | -3.17052600 | -1.54824800 |
| H | -3.69492800 | -3.88832500 | 2.35862000  |
| H | -4.93923000 | -4.68708800 | 0.37245000  |
| C | -1.02778500 | 3.19295200  | 0.25584700  |
| C | -0.29862200 | 3.64904300  | 1.38051300  |
| C | -0.82758800 | 3.75553400  | -1.02676200 |
| C | 0.61404700  | 4.70083900  | 1.20157000  |
| C | 0.10416300  | 4.79766700  | -1.15884200 |
| C | 0.81428600  | 5.27511800  | -0.05557100 |
| H | 1.17880800  | 5.06821600  | 2.05291200  |

|    |             |             |             |
|----|-------------|-------------|-------------|
| H  | 0.27218300  | 5.23977100  | -2.13649300 |
| H  | 1.52598900  | 6.08721800  | -0.17571600 |
| C  | -2.62409200 | -1.43525400 | 2.83816800  |
| H  | -2.29835000 | -0.40682800 | 2.65855400  |
| C  | -3.53859800 | -1.43663500 | 4.08551800  |
| H  | -4.41947600 | -0.80095600 | 3.93311600  |
| H  | -3.89075400 | -2.44905600 | 4.32216800  |
| H  | -2.99135600 | -1.05955300 | 4.95889300  |
| C  | -1.34824700 | -2.27475300 | 3.07317600  |
| H  | -1.58659400 | -3.32993000 | 3.26109500  |
| H  | -0.69246500 | -2.21139900 | 2.19837800  |
| H  | -0.79976100 | -1.89307200 | 3.94401500  |
| C  | -0.49352800 | 3.02715600  | 2.76283500  |
| H  | -1.07838400 | 2.11261300  | 2.62463800  |
| C  | 0.84656700  | 2.61755900  | 3.41259300  |
| H  | 0.66070100  | 2.09737200  | 4.36041000  |
| H  | 1.40546200  | 1.94207500  | 2.75795900  |
| H  | 1.47896200  | 3.48761600  | 3.62988100  |
| C  | -1.28996800 | 3.96909600  | 3.69765700  |
| H  | -0.75472400 | 4.91516100  | 3.85187100  |
| H  | -2.27594400 | 4.20220800  | 3.27992600  |
| H  | -1.43845000 | 3.49991600  | 4.67861500  |
| C  | -1.60143400 | 3.26622000  | -2.24931500 |
| H  | -2.20792000 | 2.41359900  | -1.93143400 |
| C  | -0.65377600 | 2.75659100  | -3.35800300 |
| H  | 0.00162200  | 3.55498800  | -3.73014600 |
| H  | -0.03160900 | 1.93971700  | -2.97925700 |
| H  | -1.23528700 | 2.37633900  | -4.20738800 |
| C  | -2.55547200 | 4.35811100  | -2.78833800 |
| H  | -3.25951000 | 4.68617400  | -2.01437000 |
| H  | -1.99916500 | 5.23914600  | -3.13387300 |
| H  | -3.13498200 | 3.97269700  | -3.63683000 |
| C  | -4.53429800 | -0.57703600 | -1.85936800 |
| H  | -3.96576500 | 0.34162200  | -1.68640300 |
| C  | -4.00710300 | -1.19890400 | -3.17151700 |
| H  | -2.94369600 | -1.43999400 | -3.08472700 |
| H  | -4.54806500 | -2.11789300 | -3.43101700 |
| H  | -4.13385900 | -0.49210600 | -4.00170000 |
| C  | -6.02734700 | -0.19256200 | -1.99080500 |
| H  | -6.65081900 | -1.08099800 | -2.15549900 |
| H  | -6.38829900 | 0.30893800  | -1.08519900 |
| H  | -6.17623500 | 0.48711500  | -2.83971400 |
| Ni | -0.40133900 | -0.15742600 | -0.16425600 |
| C  | 4.98505000  | 1.18752800  | -0.33468500 |
| C  | 5.63984700  | 0.13661800  | 0.35609100  |
| C  | 7.03849400  | 0.11777100  | 0.41719000  |
| C  | 7.74438700  | 1.14590100  | -0.20810100 |
| C  | 7.07723600  | 2.18294800  | -0.88788600 |
| C  | 5.68306400  | 2.22079400  | -0.96198400 |
| C  | 3.52516800  | -0.24980300 | 0.53240200  |
| H  | 7.54980100  | -0.68461500 | 0.94248000  |
| H  | 8.83171400  | 1.14915200  | -0.17179600 |
| H  | 7.65769300  | 2.96979400  | -1.36447300 |
| H  | 5.16789300  | 3.02206100  | -1.48542500 |
| N  | 4.70692600  | -0.73491700 | 0.88432000  |
| N  | 3.63593500  | 0.91866600  | -0.20850100 |
| C  | 2.57128800  | 1.74377500  | -0.75416000 |
| H  | 2.56159300  | 2.72923900  | -0.27397300 |
| H  | 2.72064900  | 1.87529200  | -1.83252700 |
| H  | 1.60599000  | 1.24516700  | -0.59808700 |
| H  | -5.07073400 | 1.18266200  | 1.22372100  |
| H  | -3.64609500 | 3.54108100  | 1.06280900  |
| C  | 1.22958000  | -1.25787300 | -0.23071200 |
| C  | 2.20969300  | -0.86574800 | 0.92359100  |
| C  | 1.55072700  | -2.36394500 | -0.96233800 |
| C  | 0.60843800  | -2.84669100 | -2.11219100 |
| C  | 1.24128000  | -3.93174900 | -3.01548700 |
| H  | 1.49027500  | -4.84831300 | -2.46807900 |
| H  | 0.53120700  | -4.20961600 | -3.80659100 |
| H  | 2.15460200  | -3.57346800 | -3.50727800 |
| C  | 0.23179800  | -1.66854900 | -3.03848200 |
| H  | -0.25714500 | -0.87331300 | -2.46245900 |
| H  | 1.12743300  | -1.24014100 | -3.50746000 |
| H  | -0.44782400 | -2.00209400 | -3.83866000 |
| C  | -0.69442500 | -3.43186300 | -1.51582000 |
| H  | -1.38589500 | -3.75810800 | -2.30860300 |
| H  | -0.48423900 | -4.29968000 | -0.87739900 |
| H  | -1.19299500 | -2.67435200 | -0.90285300 |
| C  | 2.75849100  | -3.25452300 | -0.65099800 |
| H  | 3.21219900  | -3.65523100 | -1.56718700 |



|   |            |             |             |
|---|------------|-------------|-------------|
| H | 3.55030200 | -2.67128100 | -0.17445700 |
| C | 2.43567000 | -4.44613900 | 0.28087000  |
| H | 1.67509800 | -5.09314300 | -0.17989200 |
| H | 1.98061000 | -4.06050300 | 1.20413300  |
| C | 3.66792600 | -5.29041900 | 0.63498800  |
| H | 4.12147900 | -5.67726700 | -0.29000100 |
| H | 4.42564700 | -4.64165600 | 1.09612600  |
| C | 3.35564000 | -6.46078300 | 1.57515800  |
| H | 2.62433600 | -7.14615300 | 1.12653600  |
| H | 4.25492500 | -7.04343400 | 1.81463700  |
| H | 2.92973800 | -6.10233100 | 2.52114700  |
| H | 2.47424300 | -1.71514400 | 1.56704200  |
| H | 1.69542700 | -0.14501700 | 1.57395300  |

## TS<sub>45-46</sub>

|   |             |             |             |
|---|-------------|-------------|-------------|
| C | -2.15780600 | 0.58822600  | 0.52157400  |
| C | -3.51235300 | 2.07950500  | 1.73270900  |
| C | -4.34793000 | 1.25550100  | 1.05683800  |
| N | -3.54617800 | 0.35815400  | 0.32455900  |
| N | -2.19768100 | 1.68823200  | 1.42040300  |
| C | -4.10756000 | -0.64864400 | -0.53504500 |
| C | -4.39762800 | -0.32117800 | -1.88101900 |
| C | -4.41914200 | -1.91983800 | 0.00290200  |
| C | -5.02154600 | -1.29355500 | -2.67881500 |
| C | -5.04436500 | -2.85751700 | -0.83449000 |
| C | -5.34487700 | -2.54891200 | -2.16236100 |
| H | -5.25249500 | -1.06635800 | -3.71442600 |
| H | -5.29281200 | -3.83951900 | -0.44562500 |
| H | -5.82545100 | -3.28917400 | -2.79593600 |
| C | -1.04472200 | 2.36896500  | 1.94804400  |
| C | -0.47129500 | 1.91546300  | 3.16005000  |
| C | -0.55658800 | 3.51508900  | 1.27861100  |
| C | 0.59251100  | 2.65122100  | 3.70436600  |
| C | 0.50780500  | 4.21965400  | 1.86466900  |
| C | 1.07587900  | 3.79662000  | 3.06708600  |
| H | 1.04877200  | 2.32379100  | 4.63262500  |
| H | 0.89564200  | 5.10374300  | 1.36899600  |
| H | 1.89772000  | 4.35553600  | 3.50632100  |
| C | -4.12491300 | -2.25620100 | 1.46505000  |
| H | -3.36361600 | -1.54906200 | 1.80978400  |
| C | -5.38841900 | -2.06715000 | 2.34091600  |
| H | -5.76390700 | -1.03983000 | 2.28186100  |
| H | -6.19115600 | -2.74303600 | 2.01789700  |
| H | -5.16180200 | -2.28571000 | 3.39230300  |
| C | -3.54700500 | -3.67452200 | 1.65308900  |
| H | -4.27735800 | -4.45385500 | 1.39989500  |
| H | -2.65781100 | -3.81974800 | 1.03301400  |
| H | -3.25898000 | -3.82218600 | 2.70107500  |
| C | -1.01384400 | 0.68030600  | 3.87944200  |
| H | -1.55420000 | 0.08828900  | 3.13361600  |
| C | 0.09990900  | -0.22145900 | 4.45153700  |
| H | -0.33764400 | -1.14488200 | 4.85022600  |
| H | 0.82060600  | -0.49384300 | 3.67467800  |
| H | 0.64412800  | 0.26436600  | 5.27178400  |
| C | -2.01336300 | 1.08107000  | 4.99265400  |
| H | -1.52062600 | 1.69708800  | 5.75644500  |
| H | -2.85438600 | 1.65241800  | 4.58484100  |
| H | -2.41691100 | 0.18701400  | 5.48526900  |
| C | -1.17894200 | 4.00869400  | -0.02693700 |
| H | -1.83700300 | 3.21477100  | -0.39320100 |
| C | -0.12537400 | 4.26580600  | -1.12613800 |
| H | 0.56275600  | 5.07510500  | -0.84639400 |
| H | 0.45862000  | 3.36267200  | -1.33811700 |
| H | -0.62917600 | 4.57224500  | -2.05260100 |
| C | -2.04580900 | 5.26837500  | 0.21936700  |
| H | -2.84006100 | 5.07256700  | 0.94982700  |
| H | -1.43432600 | 6.09765400  | 0.59867100  |
| H | -2.51612000 | 5.59616300  | -0.71636200 |
| C | -4.08640100 | 1.06439300  | -2.44863000 |
| H | -3.34941300 | 1.52767900  | -1.78535700 |
| C | -3.45826200 | 1.01337900  | -3.85770500 |
| H | -2.56472600 | 0.38292800  | -3.86681000 |
| H | -4.16200500 | 0.63008900  | -4.60779800 |
| H | -3.16333700 | 2.02278700  | -4.16864700 |
| C | -5.35365900 | 1.95507500  | -2.45325800 |
| H | -6.13263800 | 1.52149000  | -3.09416900 |
| H | -5.76605600 | 2.06666300  | -1.44443800 |

|    |             |             |             |
|----|-------------|-------------|-------------|
| H  | -5.11596600 | 2.95565100  | -2.83594600 |
| Ni | -0.68507300 | -0.23899400 | -0.14160100 |
| C  | 5.61670800  | 0.40075400  | 0.23387700  |
| C  | 5.56640700  | -1.01680800 | 0.29327900  |
| C  | 6.75100300  | -1.75668300 | 0.18767800  |
| C  | 7.95249300  | -1.06835900 | 0.02793700  |
| C  | 7.98562600  | 0.33856100  | -0.02773700 |
| C  | 6.81765500  | 1.09576700  | 0.07487500  |
| C  | 3.53482700  | -0.33778300 | 0.50571600  |
| H  | 6.71791700  | -2.84201900 | 0.23015400  |
| H  | 8.88323700  | -1.62496000 | -0.05694500 |
| H  | 8.93907200  | 0.84660400  | -0.15356200 |
| H  | 6.85112400  | 2.18150000  | 0.03282000  |
| N  | 4.26416600  | -1.43933600 | 0.46791300  |
| N  | 4.30235300  | 0.80891500  | 0.36950700  |
| C  | 3.81166200  | 2.18015400  | 0.36741200  |
| H  | 2.97664600  | 2.25511900  | -0.33630800 |
| H  | 3.49981200  | 2.49043800  | 1.37174000  |
| H  | 4.61892400  | 2.83683800  | 0.03279300  |
| H  | -5.42338700 | 1.21838600  | 1.02212900  |
| H  | -3.71986800 | 2.90138600  | 2.39662500  |
| C  | 1.22063300  | -0.67945600 | -0.51809700 |
| C  | 2.04665800  | -0.29277800 | 0.72911000  |
| C  | 0.59598000  | -1.92746900 | -0.56601300 |
| C  | 0.18548200  | -2.55180200 | -1.94502400 |
| C  | 1.43416100  | -3.19737500 | -2.60144900 |
| H  | 1.82642200  | -4.02957000 | -2.00943200 |
| H  | 1.18936000  | -3.58755300 | -3.60093900 |
| H  | 2.23552100  | -2.46039200 | -2.70291100 |
| C  | -0.35371900 | -1.49062200 | -2.92165300 |
| H  | -1.28822100 | -1.05999200 | -2.54361500 |
| H  | 0.35248800  | -0.67075700 | -3.04460500 |
| H  | -0.54882600 | -1.94319500 | -3.90575700 |
| C  | -0.90499200 | -3.63829200 | -1.81317700 |
| H  | -1.20396400 | -3.99117300 | -2.80984800 |
| H  | -0.55972800 | -4.51457000 | -1.25186500 |
| H  | -1.79837000 | -3.24113400 | -1.31781400 |
| C  | 0.58361400  | -2.90971700 | 0.62406200  |
| H  | 0.58096600  | -2.32518000 | 1.55054200  |
| H  | -0.37123300 | -3.45101100 | 0.64268200  |
| C  | 1.73176300  | -3.93915100 | 0.73543600  |
| H  | 2.69134700  | -3.42658000 | 0.59515300  |
| H  | 1.65060900  | -4.69057100 | -0.06257600 |
| C  | 1.73247900  | -4.66878800 | 2.08677900  |
| H  | 1.83174600  | -3.92905000 | 2.89476500  |
| H  | 0.75937100  | -5.16004200 | 2.24293600  |
| C  | 2.85353100  | -5.70706700 | 2.21380400  |
| H  | 3.83643500  | -5.23544500 | 2.09345500  |
| H  | 2.83785600  | -6.20811200 | 3.19089500  |
| H  | 2.76409100  | -6.48187200 | 1.44091500  |
| H  | 1.86718200  | -0.93691500 | 1.60223600  |
| H  | 1.77527900  | 0.72340200  | 1.03535600  |
| H  | 1.52314700  | 0.49021300  | -1.56856300 |
| O  | 1.79470000  | 1.49799400  | -2.00457000 |
| C  | 2.41576500  | 1.58032100  | -3.26856800 |
| C  | 3.26201700  | 0.32885000  | -3.57982500 |
| C  | 1.35184200  | 1.77899900  | -4.37376500 |
| C  | 3.34317300  | 2.81515100  | -3.26038900 |
| H  | 3.98323200  | 0.14738000  | -2.77560500 |
| H  | 2.63035000  | -0.55930900 | -3.67021100 |
| H  | 3.81634500  | 0.44704500  | -4.52144200 |
| H  | 0.76426800  | 2.68103300  | -4.16590900 |
| H  | 1.80717000  | 1.88358400  | -5.36928800 |
| H  | 0.66228800  | 0.92959300  | -4.40009200 |
| H  | 3.78772800  | 2.99604800  | -4.24904600 |
| H  | 2.77756800  | 3.70779000  | -2.96771000 |
| H  | 4.15924000  | 2.67703300  | -2.54238000 |

## 46

|   |            |             |             |
|---|------------|-------------|-------------|
| C | 2.28737600 | -0.57588000 | 0.53332100  |
| C | 3.63916400 | -2.05932700 | 1.71126400  |
| C | 4.46726600 | -1.20032700 | 1.06711200  |
| N | 3.65110100 | -0.30462700 | 0.35010000  |
| N | 2.32383800 | -1.68504200 | 1.38878400  |
| C | 4.18400100 | 0.76825700  | -0.45249100 |
| C | 4.52235200 | 0.51392900  | -1.80249100 |
| C | 4.39951200 | 2.03028200  | 0.14713900  |
| C | 5.09488400 | 1.55952400  | -2.54400300 |

|    |             |             |             |   |             |             |             |
|----|-------------|-------------|-------------|---|-------------|-------------|-------------|
| C  | 4.97516700  | 3.04255500  | -0.63740100 | H | -1.92001100 | 1.74232600  | -4.24873900 |
| C  | 5.32043400  | 2.81140100  | -1.96924900 | H | -2.65617500 | 1.05407700  | -2.78952500 |
| H  | 5.35989200  | 1.39355700  | -3.58247800 | C | -0.16819300 | 0.03613600  | -3.07979200 |
| H  | 5.14971000  | 4.02084300  | -0.20140300 | H | 0.81772400  | -0.27029900 | -2.70580800 |
| H  | 5.76108200  | 3.60805500  | -2.56167500 | H | -0.90584700 | -0.71571800 | -2.76747000 |
| C  | 1.15742700  | -2.34826900 | 1.92586500  | H | -0.13068700 | 0.03111000  | -4.17956300 |
| C  | 0.72154700  | -1.99977600 | 3.22456700  | C | 0.50733700  | 2.43795700  | -3.19504900 |
| C  | 0.50544000  | -3.33960900 | 1.15331900  | H | 0.53947600  | 2.31171800  | -4.28512500 |
| C  | -0.38803800 | -2.67959700 | 3.75212200  | H | 0.26272500  | 3.48863000  | -2.99766100 |
| C  | -0.60797000 | -3.97788000 | 1.72177300  | H | 1.51453500  | 2.24485600  | -2.80476700 |
| C  | -1.04863000 | -3.65712900 | 3.00757900  | C | -0.27056400 | 2.91202400  | -0.38380200 |
| H  | -0.74292500 | -2.43047400 | 4.74741600  | H | -0.09851000 | 2.76041900  | 0.68905700  |
| H  | -1.14485600 | -4.71832300 | 1.14206400  | H | 0.67546100  | 3.31400700  | -0.77140800 |
| H  | -1.91365100 | -4.16475100 | 3.42451200  | C | -1.36174200 | 3.99916500  | -0.52097500 |
| C  | 4.05818500  | 2.29723700  | 1.61309700  | H | -2.32020300 | 3.59316700  | -0.17579400 |
| H  | 3.44491300  | 1.46259700  | 1.96593000  | H | -1.48866900 | 4.27725300  | -1.57550900 |
| C  | 5.34020800  | 2.34497800  | 2.47946800  | C | -1.02752200 | 5.26241200  | 0.28439200  |
| H  | 5.90697000  | 1.40986500  | 2.40328000  | H | -0.91004400 | 4.99294200  | 1.34414300  |
| H  | 5.99739500  | 3.16542000  | 2.16395600  | H | -0.05393200 | 5.66169900  | -0.03976700 |
| H  | 5.08296800  | 2.50337300  | 3.53418000  | C | -2.09530600 | 6.35530600  | 0.15902900  |
| C  | 3.22083500  | 3.58109200  | 1.79981000  | H | -3.06823800 | 5.98959000  | 0.50841000  |
| H  | 3.78157000  | 4.48041200  | 1.51602300  | H | -1.83800600 | 7.24505200  | 0.74848400  |
| H  | 2.30765800  | 3.54099100  | 1.19897200  | H | -2.21739800 | 6.67099000  | -0.88528400 |
| H  | 2.93290800  | 3.69005800  | 2.85267000  | H | -1.38568700 | 1.49044200  | 1.63819300  |
| C  | 1.42093800  | -0.92649300 | 4.06053900  | H | -1.60341500 | -0.25942300 | 1.64294300  |
| H  | 2.17602000  | -0.44973200 | 3.42781800  | H | -1.59289200 | -0.31627900 | -0.88338300 |
| C  | 0.44627800  | 0.18251700  | 4.51647100  | O | -2.50560000 | -2.10950200 | -1.92995700 |
| H  | 0.99007000  | 0.96068700  | 5.06694800  | C | -3.33490600 | -2.65162400 | -2.87532400 |
| H  | -0.04335200 | 0.64758300  | 3.65573500  | C | -4.48918300 | -1.67249600 | -3.24709700 |
| H  | -0.33339600 | -0.21162700 | 5.17945000  | C | -2.55732900 | -2.98484500 | -4.18470500 |
| C  | 2.15196500  | -1.54897500 | 5.27445000  | C | -3.98281500 | -3.97742200 | -2.36522700 |
| H  | 1.44375000  | -2.04751000 | 5.94803200  | H | -5.06703600 | -1.41812000 | -2.34921100 |
| H  | 2.89058400  | -2.29369000 | 4.95512200  | H | -4.06714100 | -0.74026700 | -3.64194600 |
| H  | 2.67486300  | -0.77302900 | 5.84775200  | H | -5.18677300 | -2.07808300 | -3.99800700 |
| C  | 1.01545500  | -3.74490100 | -0.23067600 | H | -1.74072200 | -3.68332400 | -3.96162900 |
| H  | 1.48713900  | -2.86060200 | -0.67396600 | H | -3.18986900 | -3.43402500 | -4.96756800 |
| C  | -0.09674400 | -4.19887800 | -1.19735200 | H | -2.10896400 | -2.06940400 | -4.58963800 |
| H  | -0.54805600 | -5.14770700 | -0.87302900 | H | -4.64316000 | -4.45811400 | -3.10513600 |
| H  | -0.89640300 | -3.44939000 | -1.32810800 | H | -3.19441900 | -4.69183800 | -2.09533200 |
| H  | 0.34647900  | -4.38194600 | -2.18520300 | H | -4.57596000 | -3.78148600 | -1.46201900 |
| C  | 2.09999100  | -4.84708200 | -0.09664400 |   |             |             |             |
| H  | 2.94429100  | -4.52265400 | 0.52282200  |   |             |             |             |
| H  | 1.67257800  | -5.75220600 | 0.35442700  |   |             |             |             |
| H  | 2.48759600  | -5.11435900 | -1.08759200 |   |             |             |             |
| C  | 4.31347600  | -0.86179900 | -2.43680700 |   |             |             |             |
| H  | 3.57717000  | -1.39534400 | -1.82688000 |   |             |             |             |
| C  | 3.74739600  | -0.78568600 | -3.87101900 |   |             |             |             |
| H  | 2.82865600  | -0.19350200 | -3.90391100 |   |             |             |             |
| H  | 4.46859400  | -0.34872500 | -4.57322700 |   |             |             |             |
| H  | 3.51043100  | -1.79442600 | -4.22888500 |   |             |             |             |
| C  | 5.62766600  | -1.68235600 | -2.42032400 |   |             |             |             |
| H  | 6.40629800  | -1.18118400 | -3.00983700 |   |             |             |             |
| H  | 6.00563800  | -1.81459900 | -1.40071200 |   |             |             |             |
| H  | 5.46037400  | -2.67681300 | -2.85190000 |   |             |             |             |
| Ni | 0.78157600  | 0.25617000  | -0.15141000 |   |             |             |             |
| C  | -5.46313800 | 0.43088400  | 0.90970400  |   |             |             |             |
| C  | -5.23376300 | 1.81900100  | 1.09922300  |   |             |             |             |
| C  | -6.32072400 | 2.69944300  | 1.17871100  |   |             |             |             |
| C  | -7.60662600 | 2.17618800  | 1.06666900  |   |             |             |             |
| C  | -7.81819600 | 0.79563800  | 0.87632000  |   |             |             |             |
| C  | -6.75165200 | -0.09845500 | 0.79389200  |   |             |             |             |
| C  | -3.30265600 | 0.88303100  | 1.05080800  |   |             |             |             |
| H  | -6.14920800 | 3.76308800  | 1.32172500  |   |             |             |             |
| H  | -8.46492800 | 2.84215000  | 1.12203300  |   |             |             |             |
| H  | -8.83447500 | 0.41911000  | 0.78573100  |   |             |             |             |
| H  | -6.92233300 | -1.15957100 | 0.63560700  |   |             |             |             |
| N  | -3.87800600 | 2.06705400  | 1.18780900  |   |             |             |             |
| N  | -4.20686500 | -0.14593100 | 0.89015100  |   |             |             |             |
| C  | -3.89733500 | -1.56606900 | 0.71336700  |   |             |             |             |
| H  | -3.40366400 | -1.76497400 | -0.26524300 |   |             |             |             |
| H  | -3.25505000 | -1.90587800 | 1.53366200  |   |             |             |             |
| H  | -4.83658200 | -2.12283000 | 0.76738100  |   |             |             |             |
| H  | 5.54123900  | -1.13453500 | 1.04653200  |   |             |             |             |
| H  | 3.85099000  | -2.89122000 | 2.36030200  |   |             |             |             |
| C  | -1.19261700 | 0.52914200  | -0.31548400 |   |             |             |             |
| C  | -1.81423500 | 0.65701000  | 1.07707300  |   |             |             |             |
| C  | -0.54892500 | 1.55106700  | -1.03040800 |   |             |             |             |
| C  | -0.52222100 | 1.45977700  | -2.58935500 |   |             |             |             |
| C  | -1.92982200 | 1.78863200  | -3.15034400 |   |             |             |             |
| H  | -2.27555400 | 2.78673300  | -2.86213000 |   |             |             |             |
| H  | -1.24336400 | 0.31365700  | -0.00017500 |   |             |             |             |
| C  | -3.13916000 | 1.68544200  | 0.00047500  |   |             |             |             |
| C  | -3.57445800 | 0.39983200  | 0.00044500  |   |             |             |             |
| N  | -2.43622100 | -0.42458100 | 0.00003400  |   |             |             |             |
| N  | -1.73288900 | 1.63574300  | 0.00010200  |   |             |             |             |
| C  | -2.49155300 | -1.86649000 | -0.00003500 |   |             |             |             |
| C  | -2.52321500 | -2.55198900 | -1.23574300 |   |             |             |             |
| C  | -2.52273200 | -2.55207600 | 1.23562200  |   |             |             |             |
| C  | -2.58216600 | -3.95453600 | -1.20891600 |   |             |             |             |
| C  | -2.58172200 | -3.95462400 | 1.20872200  |   |             |             |             |
| C  | -2.61057600 | -4.65161400 | -0.00011300 |   |             |             |             |
| H  | -2.60000200 | -4.50429300 | -2.14448300 |   |             |             |             |
| H  | -2.59924200 | -4.50443000 | 2.14426900  |   |             |             |             |
| H  | -2.65360900 | -5.73653400 | -0.00014700 |   |             |             |             |
| C  | -0.86653800 | 2.78071800  | 0.00018400  |   |             |             |             |
| C  | -0.43639200 | 3.32107800  | 1.23829700  |   |             |             |             |
| C  | -0.43659200 | 3.32143800  | -1.23781800 |   |             |             |             |
| C  | 0.48897600  | 4.38092800  | 1.21207400  |   |             |             |             |
| C  | 0.48881000  | 4.38128000  | -1.21142400 |   |             |             |             |
| C  | 0.95936300  | 4.90039200  | 0.00035900  |   |             |             |             |
| H  | 0.83634100  | 4.80705200  | 2.14746800  |   |             |             |             |
| H  | 0.83605700  | 4.80762600  | -2.14676000 |   |             |             |             |
| H  | 1.66833900  | 5.72269900  | 0.00043600  |   |             |             |             |
| C  | -2.46562700 | -1.82068100 | 2.57645900  |   |             |             |             |
| H  | -2.50058600 | -0.74557700 | 2.37344700  |   |             |             |             |
| C  | -3.67650700 | -2.16451400 | 3.47374800  |   |             |             |             |
| H  | -4.62327400 | -1.93377100 | 2.97158100  |   |             |             |             |
| H  | -3.68985600 | -3.22744600 | 3.74257600  |   |             |             |             |
| H  | -3.63375100 | -1.58735100 | 4.40525700  |   |             |             |             |
| C  | -1.12980600 | -2.10275500 | 3.30364800  |   |             |             |             |
| H  | -1.02009300 | -3.16976700 | 3.53359800  |   |             |             |             |

Cartesian coordinates for the stationary points given in Fig. S6.

47

|    |             |             |             |
|----|-------------|-------------|-------------|
| H  | -0.28268300 | -1.79322100 | 2.68120000  |
| H  | -1.08592100 | -1.54770600 | 4.24895500  |
| C  | -0.93024100 | 2.77803700  | 2.57860100  |
| H  | -1.64613200 | 1.97854400  | 2.36673400  |
| C  | 0.22209900  | 2.15536500  | 3.40116800  |
| H  | -0.16293300 | 1.75038000  | 4.34437100  |
| H  | 0.69215500  | 1.33426200  | 2.84706200  |
| H  | 0.98879600  | 2.90101500  | 3.64809200  |
| C  | -1.66884900 | 3.87010700  | 3.38771100  |
| H  | -0.99866200 | 4.69661500  | 3.65325000  |
| H  | -2.50966300 | 4.28685200  | 2.82152100  |
| H  | -2.06085000 | 3.44671200  | 4.31963500  |
| C  | -0.93055000 | 2.77873700  | -2.57822300 |
| H  | -1.64678600 | 1.97951400  | -2.36649800 |
| C  | 0.22167500  | 2.15567100  | -3.40068000 |
| H  | 0.98869900  | 2.90106700  | -3.64736200 |
| H  | 0.69127900  | 1.33431500  | -2.84655500 |
| H  | -0.16335500 | 1.75094800  | -4.34399600 |
| C  | -1.66859700 | 3.87115800  | -3.38734700 |
| H  | -2.50924500 | 4.28830400  | -2.82120700 |
| H  | -0.99801200 | 4.69734900  | -3.65286800 |
| H  | -2.06075200 | 3.44795300  | -4.31929400 |
| C  | -2.46628600 | -1.82047700 | -2.57652700 |
| H  | -2.50248400 | -0.74541400 | -2.37348900 |
| C  | -1.12974400 | -2.10120500 | -3.30294100 |
| H  | -0.28330000 | -1.79084300 | -2.67997000 |
| H  | -1.01888300 | -3.16813200 | -3.53275200 |
| H  | -1.08583100 | -1.54614800 | -4.24824500 |
| C  | -3.67628000 | -2.16545500 | -3.47454100 |
| H  | -3.68828700 | -3.22830300 | -3.74375400 |
| H  | -4.62358600 | -1.93594100 | -2.97282800 |
| H  | -3.63366400 | -1.58795700 | -4.40584800 |
| Ni | 0.49607800  | -0.25152000 | -0.00042300 |
| C  | 4.28417500  | -1.90892200 | -0.00000700 |
| C  | 4.58241900  | -0.52453000 | -0.00019200 |
| C  | 5.91834500  | -0.10397800 | -0.00016400 |
| C  | 6.92006600  | -1.07451200 | 0.00007000  |
| C  | 6.60766000  | -2.44680200 | 0.00026000  |
| C  | 5.28219700  | -2.88576900 | 0.00022500  |
| C  | 2.36494800  | -0.69165000 | -0.00039100 |
| H  | 6.16267400  | 0.95597600  | -0.00030400 |
| H  | 7.96315800  | -0.76777300 | 0.00010200  |
| H  | 7.41200800  | -3.17799000 | 0.00044600  |
| H  | 5.04342700  | -3.94605900 | 0.00037600  |
| N  | 3.40117800  | 0.19262500  | -0.00046200 |
| N  | 2.90433300  | -1.98017100 | -0.00010500 |
| C  | 2.14167300  | -3.21009800 | -0.00011500 |
| H  | 2.36407400  | -3.81174900 | -0.89088600 |
| H  | 2.36373000  | -3.81157000 | 0.89086300  |
| H  | 1.08033500  | -2.95043900 | -0.00034300 |
| H  | -4.57207500 | -0.00495600 | 0.00064900  |
| H  | -3.68348100 | 2.61438200  | 0.00078200  |
| Na | 2.01929400  | 1.94109900  | -0.00059300 |

### TS<sub>47-48</sub>

|   |             |             |             |
|---|-------------|-------------|-------------|
| C | -1.02595300 | 0.78384000  | 0.95398600  |
| C | -2.22448000 | 2.75479200  | 1.32446700  |
| C | -2.54731000 | 1.90193700  | 2.32393000  |
| N | -1.84657300 | 0.70310100  | 2.09665100  |
| N | -1.31361700 | 2.08429000  | 0.48207200  |
| C | -2.09551700 | -0.49906700 | 2.85953100  |
| C | -3.25937900 | -1.25369400 | 2.57038800  |
| C | -1.20849100 | -0.86641900 | 3.89888500  |
| C | -3.50392000 | -2.40744000 | 3.33310500  |
| C | -1.49661500 | -2.03248300 | 4.62639000  |
| C | -2.62817300 | -2.79961500 | 4.34489200  |
| H | -4.38971100 | -3.00138700 | 3.13423100  |
| H | -0.83200500 | -2.34184800 | 5.42437100  |
| H | -2.83149800 | -3.69702200 | 4.92137100  |
| C | -0.84003100 | 2.62182100  | -0.77104500 |
| C | 0.24878100  | 3.53519600  | -0.78151500 |
| C | -1.50185300 | 2.24205900  | -1.96929500 |
| C | 0.69917000  | 4.01046500  | -2.02908500 |
| C | -1.01312900 | 2.75158700  | -3.18328500 |
| C | 0.08139500  | 3.61601500  | -3.21800800 |
| H | 1.52177400  | 4.71558200  | -2.06667900 |
| H | -1.49045600 | 2.46290600  | -4.11109900 |
| H | 0.44099300  | 3.99846200  | -4.16847500 |

|    |             |             |             |
|----|-------------|-------------|-------------|
| C  | -0.01621600 | 0.01298900  | 4.27510300  |
| H  | 0.29781500  | 0.54095600  | 3.36835900  |
| C  | -0.43442300 | 1.06945500  | 5.32963300  |
| H  | 0.41544800  | 1.71783900  | 5.57551300  |
| H  | -1.24938000 | 1.70368300  | 4.96422500  |
| H  | -0.77009300 | 0.58343500  | 6.25443200  |
| C  | 1.19951100  | -0.79049300 | 4.77802100  |
| H  | 0.99790000  | -1.29056300 | 5.73306500  |
| H  | 1.50478300  | -1.54328800 | 4.04429700  |
| H  | 2.04664500  | -0.11500800 | 4.93987800  |
| C  | 0.87689200  | 4.07383400  | 0.50756900  |
| H  | 0.75848300  | 3.30652800  | 1.28161600  |
| C  | 2.38208500  | 4.39629600  | 0.37058100  |
| H  | 2.80804800  | 4.60265100  | 1.35774600  |
| H  | 2.95255700  | 3.56808700  | -0.06447700 |
| H  | 2.54948300  | 5.28373300  | -0.25100700 |
| C  | 0.14379900  | 5.35587300  | 0.98415800  |
| H  | 0.59642000  | 5.72738600  | 1.91115300  |
| H  | 0.22149300  | 6.14454100  | 0.22585400  |
| H  | -0.91602400 | 5.17467000  | 1.17723600  |
| C  | -2.74921500 | 1.35506300  | -1.94908900 |
| H  | -2.60671700 | 0.61539500  | -1.15280600 |
| C  | -2.98763800 | 0.58244000  | -3.26211400 |
| H  | -3.29669400 | 1.25166700  | -4.07534300 |
| H  | -2.10057500 | 0.03254700  | -3.58411200 |
| H  | -3.79825400 | -0.14030300 | -3.11607800 |
| C  | -4.01161100 | 2.19544200  | -1.61869600 |
| H  | -3.93526400 | 2.69467500  | -0.64913600 |
| H  | -4.17400400 | 2.95989200  | -2.38893700 |
| H  | -4.89612500 | 1.54728700  | -1.59607000 |
| C  | -4.27701700 | -0.81702900 | 1.51316400  |
| H  | -3.80231300 | -0.05820100 | 0.88362400  |
| C  | -4.72110500 | -1.96856400 | 0.58520100  |
| H  | -3.86271800 | -2.44522000 | 0.10470500  |
| H  | -5.27955500 | -2.73905100 | 1.12946600  |
| H  | -5.38047200 | -1.58046100 | -0.20032900 |
| C  | -5.51701700 | -0.17138500 | 2.18164800  |
| H  | -6.02861400 | -0.89458400 | 2.82847900  |
| H  | -5.24052800 | 0.69153000  | 2.79633900  |
| H  | -6.22944100 | 0.16711000  | 1.41968200  |
| Ni | 0.30031200  | -0.38445500 | 0.44854200  |
| C  | 0.13161400  | -1.35646700 | -3.40879800 |
| C  | -0.70130400 | -2.43157100 | -2.99792800 |
| C  | -1.38298300 | -3.23553400 | -3.90754400 |
| C  | -1.22206700 | -2.94870700 | -5.26962700 |
| C  | -0.40478400 | -1.88996200 | -5.69328100 |
| C  | 0.27673800  | -1.08428900 | -4.77543100 |
| C  | 0.20279700  | -1.39313100 | -1.20084000 |
| H  | -2.01124600 | -4.06050700 | -3.58216000 |
| H  | -1.73456400 | -3.56067500 | -6.00692600 |
| H  | -0.29625200 | -1.69458400 | -6.75721300 |
| H  | 0.91121100  | -0.26628400 | -5.10836200 |
| N  | -0.65515200 | -2.42167300 | -1.61160700 |
| N  | 0.68005500  | -0.74238600 | -2.30484900 |
| C  | -1.28881700 | -3.38601000 | -0.74383500 |
| H  | -1.40087800 | -2.94795900 | 0.25114000  |
| H  | -2.28286900 | -3.63642500 | -1.12929600 |
| H  | -0.70631200 | -4.31514700 | -0.66393700 |
| H  | -3.20905200 | 2.02248800  | 3.16369600  |
| H  | -2.56164000 | 3.75571300  | 1.12308000  |
| C  | 2.21412000  | -0.83110200 | 0.64777700  |
| C  | 1.52292300  | -1.93515200 | -0.09695000 |
| C  | 3.56066400  | -0.77343200 | 0.79124200  |
| C  | 4.27873900  | 0.29920800  | 1.64606500  |
| C  | 3.30590300  | 1.35345300  | 2.19213900  |
| H  | 2.53640200  | 0.89301000  | 2.81349200  |
| H  | 3.85059800  | 2.09813100  | 2.78822700  |
| H  | 2.78211200  | 1.87481100  | 1.38787400  |
| C  | 5.38051000  | 1.02501800  | 0.83693400  |
| H  | 6.13679100  | 0.33327600  | 0.45079000  |
| H  | 4.95356300  | 1.56213400  | -0.02225600 |
| H  | 5.89924800  | 1.76307500  | 1.46271700  |
| C  | 4.94485900  | -0.37986600 | 2.87249500  |
| H  | 5.43112700  | 0.37148700  | 3.50864300  |
| H  | 4.19508000  | -0.90279000 | 3.47602900  |
| H  | 5.71102400  | -1.10723400 | 2.58443900  |
| C  | 4.47327400  | -1.85083600 | 0.18193600  |
| H  | 5.43644300  | -1.89930700 | 0.70493700  |
| H  | 4.01469100  | -2.83953000 | 0.31931400  |
| C  | 4.76763800  | -1.66045800 | -1.32350800 |

|    |            |             |             |
|----|------------|-------------|-------------|
| H  | 5.25974200 | -0.68943300 | -1.47938600 |
| H  | 3.82140100 | -1.61558500 | -1.88070000 |
| C  | 5.64854400 | -2.76778800 | -1.91838300 |
| H  | 6.59887100 | -2.81087000 | -1.36685800 |
| H  | 5.16086500 | -3.74037900 | -1.76031000 |
| C  | 5.93195300 | -2.57683800 | -3.41244500 |
| H  | 6.44982600 | -1.62731500 | -3.59925900 |
| H  | 6.56181800 | -3.38189200 | -3.80896300 |
| H  | 5.00081200 | -2.56614000 | -3.99269200 |
| H  | 2.05890700 | -2.40426500 | -0.92505800 |
| H  | 1.12591600 | -2.72092400 | 0.55978000  |
| Na | 1.85378700 | 0.94590200  | -1.29036500 |

|    |             |             |             |
|----|-------------|-------------|-------------|
| C  | -0.00349000 | -1.24971800 | -3.67791300 |
| C  | -0.89030000 | -2.28862300 | -3.28949000 |
| C  | -1.62095400 | -3.03059600 | -4.21405000 |
| C  | -1.45004600 | -2.71877200 | -5.56887900 |
| C  | -0.57582000 | -1.69698800 | -5.97123600 |
| C  | 0.15295100  | -0.95321700 | -5.03822100 |
| C  | 0.07180200  | -1.34236900 | -1.47327700 |
| H  | -2.29338800 | -3.82639300 | -3.90481700 |
| H  | -1.99943100 | -3.28183800 | -6.31847000 |
| H  | -0.46079800 | -1.48248100 | -7.03074400 |
| H  | 0.83164800  | -0.16466100 | -5.35456000 |
| N  | -0.83279800 | -2.31906800 | -1.90478900 |
| N  | 0.58275100  | -0.69578300 | -2.56161800 |
| C  | -1.54211000 | -3.24817800 | -1.05825900 |
| H  | -1.53966600 | -2.86094700 | -0.03694600 |
| H  | -2.58108800 | -3.34425600 | -1.39304000 |
| H  | -1.08153600 | -4.24619700 | -1.06782100 |
| H  | -3.26269400 | 1.91828000  | 3.08957700  |
| H  | -2.84865500 | 3.64712700  | 0.98031100  |
| C  | 2.10472100  | -0.85161100 | 0.33515500  |
| C  | 1.35580500  | -1.94391500 | -0.35178700 |
| C  | 3.40218600  | -0.82932800 | 0.71759200  |
| C  | 4.38574000  | -2.04319500 | 0.61025200  |
| C  | 3.71991700  | -3.35401000 | 1.09367600  |
| H  | 2.90853200  | -3.68341000 | 0.44196700  |
| H  | 4.46114900  | -4.16366600 | 1.12219600  |
| H  | 3.31165100  | -3.23422600 | 2.10397000  |
| C  | 5.65181400  | -1.87151500 | 1.48418500  |
| H  | 6.24472400  | -0.99185100 | 1.21469900  |
| H  | 5.39978900  | -1.79620800 | 2.54854000  |
| H  | 6.30104700  | -2.74775500 | 1.36282400  |
| C  | 4.84656400  | -2.22884900 | -0.85766200 |
| H  | 5.50287500  | -3.10503600 | -0.95326400 |
| H  | 3.99604000  | -2.37423300 | -1.53133000 |
| H  | 5.40578600  | -1.35570600 | -1.21369100 |
| C  | 3.96522600  | 0.47005900  | 1.29353400  |
| H  | 3.11482500  | 1.09619600  | 1.58625600  |
| H  | 4.53870100  | 0.28020400  | 2.21113400  |
| C  | 4.86596200  | 1.28184400  | 0.33529700  |
| H  | 4.25421400  | 1.65517700  | -0.50652400 |
| H  | 5.62309400  | 0.63480000  | -0.12479900 |
| C  | 5.57244900  | 2.46814500  | 1.00589300  |
| H  | 4.82933500  | 3.10323100  | 1.50720100  |
| H  | 6.22646700  | 2.08417500  | 1.80147300  |
| C  | 6.39814900  | 3.31469800  | 0.03116300  |
| H  | 5.76396200  | 3.74834300  | -0.75325100 |
| H  | 6.90302300  | 4.14196500  | 0.54355900  |
| H  | 7.16814900  | 2.71062600  | -0.46463700 |
| H  | 1.87147800  | -2.44817600 | -1.17273700 |
| H  | 0.90111700  | -2.69633200 | 0.30355800  |
| Na | 1.74873400  | 0.99558800  | -1.52276700 |

## ZTS<sub>47-48</sub>

|    |             |             |             |
|----|-------------|-------------|-------------|
| C  | -1.14720400 | 0.77011200  | 0.76715500  |
| C  | -2.45032800 | 2.66685600  | 1.17430500  |
| C  | -2.65428400 | 1.81765000  | 2.20816200  |
| N  | -1.88822900 | 0.66318200  | 1.96155900  |
| N  | -1.55314300 | 2.03424400  | 0.29135700  |
| C  | -1.89672500 | -0.48280500 | 2.84015600  |
| C  | -2.97499700 | -1.39856200 | 2.76146000  |
| C  | -0.85752900 | -0.63238200 | 3.78991600  |
| C  | -2.97946300 | -2.48726700 | 3.64888200  |
| C  | -0.90801000 | -1.74207200 | 4.64871600  |
| C  | -1.95412600 | -2.66296000 | 4.57825800  |
| H  | -3.79318100 | -3.20346100 | 3.61352800  |
| H  | -0.12336900 | -1.88433800 | 5.38287800  |
| H  | -1.97409200 | -3.51333000 | 5.25317500  |
| C  | -1.04011700 | 2.64465000  | -0.90697700 |
| C  | 0.04529900  | 3.55172900  | -0.79923400 |
| C  | -1.63476400 | 2.33485500  | -2.15601800 |
| C  | 0.57080200  | 4.09748500  | -1.98592000 |
| C  | -1.07547500 | 2.91110200  | -3.30875100 |
| C  | 0.02279400  | 3.77061100  | -3.22953900 |
| H  | 1.39144200  | 4.80547200  | -1.93224600 |
| H  | -1.49851600 | 2.68019800  | -4.27829600 |
| H  | 0.43612200  | 4.20497900  | -4.13490100 |
| C  | 0.24662900  | 0.41510200  | 3.94091300  |
| H  | 0.34519400  | 0.92871500  | 2.97912600  |
| C  | -0.14946900 | 1.46112000  | 5.01395400  |
| H  | 0.62547500  | 2.23303300  | 5.09832000  |
| H  | -1.09529600 | 1.95493100  | 4.76458300  |
| H  | -0.26385800 | 0.98669700  | 5.99679100  |
| C  | 1.62683000  | -0.19302700 | 4.26129000  |
| H  | 1.64783900  | -0.68113300 | 5.24336600  |
| H  | 1.91972700  | -0.91779000 | 3.49583200  |
| H  | 2.38253900  | 0.60085900  | 4.27650200  |
| C  | 0.57209600  | 4.01615800  | 0.56068900  |
| H  | 0.24434800  | 3.28858600  | 1.30979400  |
| C  | 2.11041200  | 4.08843300  | 0.63402400  |
| H  | 2.42069600  | 4.37646500  | 1.64489100  |
| H  | 2.56674300  | 3.11758500  | 0.41690000  |
| H  | 2.52415000  | 4.83109800  | -0.05854700 |
| C  | -0.03732300 | 5.39341900  | 0.92839400  |
| H  | 0.29782600  | 5.70467000  | 1.92488900  |
| H  | 0.27449400  | 6.16035700  | 0.20876700  |
| H  | -1.13160800 | 5.36292000  | 0.93262300  |
| C  | -2.87714200 | 1.44519300  | -2.24264900 |
| H  | -2.75363100 | 0.64988200  | -1.49763000 |
| C  | -3.07156600 | 0.77746200  | -3.61823900 |
| H  | -3.35919600 | 1.50905400  | -4.38437000 |
| H  | -2.17246300 | 0.25718400  | -3.95562200 |
| H  | -3.88151200 | 0.04228700  | -3.55544800 |
| C  | -4.15389900 | 2.25166400  | -1.88451300 |
| H  | -4.11225100 | 2.66535900  | -0.87344800 |
| H  | -4.29359500 | 3.07929900  | -2.59123800 |
| H  | -5.03538400 | 1.60229200  | -1.94714200 |
| C  | -4.14296200 | -1.19891400 | 1.79192000  |
| H  | -3.79905600 | -0.53732900 | 0.98897900  |
| C  | -4.62387400 | -2.51381700 | 1.13934000  |
| H  | -3.79517200 | -3.06935400 | 0.69255700  |
| H  | -5.11953500 | -3.16913500 | 1.86522600  |
| H  | -5.35286500 | -2.29240400 | 0.35094100  |
| C  | -5.33920600 | -0.51223200 | 2.49936400  |
| H  | -5.70700500 | -1.13682700 | 3.32270300  |
| H  | -5.06272700 | 0.46219800  | 2.91251600  |
| H  | -6.16417000 | -0.35885500 | 1.79301400  |
| Ni | 0.20049900  | -0.33035200 | 0.18076800  |

## 48

|   |             |             |             |
|---|-------------|-------------|-------------|
| C | -1.80023000 | 0.68641500  | -0.48252200 |
| C | -3.02797900 | 2.30016100  | -1.64739300 |
| C | -3.78760300 | 1.91221400  | -0.59333200 |
| N | -3.05161200 | 0.94077000  | 0.11221500  |
| N | -1.83095600 | 1.56831100  | -1.58182000 |
| C | -3.56488000 | 0.28393800  | 1.28845000  |
| C | -4.41391000 | -0.83547000 | 1.13335100  |
| C | -3.25675100 | 0.81320400  | 2.56513800  |
| C | -4.96364800 | -1.41265300 | 2.29013700  |
| C | -3.82895100 | 0.19944600  | 3.68994600  |
| C | -4.67735100 | -0.90237000 | 3.55588200  |
| H | -5.62183300 | -2.26994200 | 2.19649400  |
| H | -3.61571300 | 0.58786400  | 4.67999400  |
| H | -5.11456400 | -1.36030100 | 4.43799300  |
| C | -0.75011100 | 1.73459300  | -2.51995900 |
| C | 0.15841900  | 2.80266000  | -2.33269600 |
| C | -0.64727800 | 0.85578000  | -3.62278400 |
| C | 1.18375200  | 2.97219400  | -3.27734700 |
| C | 0.39931500  | 1.06266600  | -4.53585100 |
| C | 1.30717700  | 2.10981000  | -4.36890000 |
| H | 1.88585900  | 3.79207200  | -3.15963100 |
| H | 0.49949200  | 0.39885900  | -5.38873000 |
| H | 2.10329100  | 2.25890900  | -5.09253400 |
| C | -2.35707200 | 2.04021900  | 2.71914900  |
| H | -1.71366000 | 2.08088400  | 1.83270600  |
| C | -3.18986500 | 3.34543900  | 2.76785600  |

|    |             |             |             |
|----|-------------|-------------|-------------|
| H  | -3.78908100 | 3.46753000  | 1.86005000  |
| H  | -3.87073300 | 3.33986900  | 3.62814800  |
| H  | -2.53171900 | 4.21842800  | 2.85912800  |
| C  | -1.43390000 | 1.96259200  | 3.95484100  |
| H  | -1.99206600 | 2.05876000  | 4.89354900  |
| H  | -0.89450000 | 1.00606900  | 3.99715500  |
| H  | -0.69793500 | 2.77466400  | 3.92584500  |
| C  | 0.04492800  | 3.76747000  | -1.15245000 |
| H  | -0.76202200 | 3.40846900  | -0.50643600 |
| C  | 1.33258000  | 3.78909500  | -0.29857300 |
| H  | 1.20482600  | 4.45854600  | 0.56096400  |
| H  | 1.56283000  | 2.78734200  | 0.07868900  |
| H  | 2.19493900  | 4.15003300  | -0.87253400 |
| C  | -0.32936700 | 5.19240200  | -1.62513700 |
| H  | 0.44652200  | 5.61131700  | -2.27762700 |
| H  | -1.27227700 | 5.19128800  | -2.18401900 |
| H  | -0.44329600 | 5.86277600  | -0.76459300 |
| C  | -1.63184700 | -0.29076700 | -3.84660400 |
| H  | -2.35248200 | -0.27488000 | -3.02350900 |
| C  | -0.92164600 | -1.66305100 | -3.80163000 |
| H  | -0.17555800 | -1.75560200 | -4.60096300 |
| H  | -0.41871300 | -1.80190000 | -2.83801100 |
| H  | -1.65167500 | -2.47189400 | -3.92856800 |
| C  | -2.41965600 | -0.11029000 | -5.16543400 |
| H  | -2.95812200 | 0.84451400  | -5.18026000 |
| H  | -1.75361000 | -0.13402400 | -6.03656800 |
| H  | -3.15233900 | -0.91780100 | -5.28295700 |
| C  | -4.76240200 | -1.39991300 | -0.24392000 |
| H  | -4.06509100 | -0.96172800 | -0.96507000 |
| C  | -4.58811900 | -2.93263000 | -0.31630600 |
| H  | -3.57540900 | -3.22725700 | -0.02608700 |
| H  | -5.29917900 | -3.45566400 | 0.33468500  |
| H  | -4.76498600 | -3.27970000 | -1.34145600 |
| C  | -6.19705600 | -0.99494200 | -0.66297700 |
| H  | -6.93891800 | -1.40323000 | 0.03466200  |
| H  | -6.31599500 | 0.09409500  | -0.68234500 |
| H  | -6.42549900 | -1.37998700 | -1.66410400 |
| Ni | -0.44196300 | -0.46787000 | -0.08768700 |
| C  | 4.67312400  | 1.67183300  | 1.00647500  |
| C  | 3.86838700  | 1.32168200  | 2.11358500  |
| C  | 4.10226100  | 1.90905500  | 3.36217000  |
| C  | 5.13418400  | 2.83864900  | 3.46792400  |
| C  | 5.92468200  | 3.18125700  | 2.35435600  |
| C  | 5.70783000  | 2.60433200  | 1.10374600  |
| C  | 3.13331900  | 0.15816000  | 0.43450600  |
| H  | 3.49656500  | 1.63848800  | 4.22338800  |
| H  | 5.33615600  | 3.30827200  | 4.42653500  |
| H  | 6.72049900  | 3.91165200  | 2.47043900  |
| H  | 6.31973200  | 2.87852500  | 0.24920700  |
| N  | 2.92056700  | 0.38491500  | 1.72474700  |
| N  | 4.18827800  | 0.90970000  | -0.04745300 |
| C  | 4.64754600  | 0.96220300  | -1.42472500 |
| H  | 4.65948700  | -0.04251800 | -1.85357000 |
| H  | 3.99811000  | 1.59842000  | -2.03693100 |
| H  | 5.66448300  | 1.35967800  | -1.44598400 |
| H  | -4.77046100 | 2.22206800  | -0.28248800 |
| H  | -3.21968900 | 3.01499200  | -2.42921000 |
| C  | 1.17728400  | -1.52772700 | 0.16992100  |
| C  | 2.36014600  | -0.76439800 | -0.47050500 |
| C  | 1.43173000  | -2.78882800 | 0.63912100  |
| C  | 0.27879800  | -3.69319100 | 1.18715900  |
| C  | -0.63372100 | -4.11665700 | 0.00897800  |
| H  | -0.06859800 | -4.67058300 | -0.75029100 |
| H  | -1.45296800 | -4.76272700 | 0.35647700  |
| H  | -1.05888600 | -3.22807200 | -0.46901100 |
| C  | -0.59762800 | -2.94831500 | 2.21910400  |
| H  | -0.00501400 | -2.67013300 | 3.10789900  |
| H  | -1.04343300 | -2.04738500 | 1.77665200  |
| H  | -1.41585700 | -3.58851900 | 2.57452700  |
| C  | 0.77757800  | -4.97882400 | 1.88605300  |
| H  | -0.08367500 | -5.56121700 | 2.23638500  |
| H  | 1.35538100  | -5.62736700 | 1.21893500  |
| H  | 1.39880300  | -4.75682700 | 2.76296300  |
| C  | 2.81745500  | -3.43854100 | 0.55079100  |
| H  | 3.59509500  | -2.66796300 | 0.61307600  |
| H  | 2.99999300  | -4.08500900 | 1.41660100  |
| C  | 3.06837400  | -4.26914900 | -0.72802200 |
| H  | 2.89058400  | -3.63696800 | -1.60972900 |
| H  | 2.33248900  | -5.08225300 | -0.79425700 |
| C  | 4.48212400  | -4.86258100 | -0.79786200 |

|    |            |             |             |
|----|------------|-------------|-------------|
| H  | 5.21975900 | -4.04948900 | -0.72716600 |
| H  | 4.65137600 | -5.49975900 | 0.08213800  |
| C  | 4.73883800 | -5.67397000 | -2.07255000 |
| H  | 4.60955900 | -5.05443900 | -2.96903100 |
| H  | 5.75661900 | -6.08154900 | -2.09301400 |
| H  | 4.04107100 | -6.51686500 | -2.15283200 |
| H  | 1.96258600 | -0.13942500 | -1.28384600 |
| H  | 3.09546500 | -1.42495800 | -0.95906900 |
| Na | 0.75107700 | -0.29101600 | 2.26832700  |

## TS<sub>48-49</sub>

|    |             |             |             |
|----|-------------|-------------|-------------|
| C  | 1.94594600  | 0.32534300  | 0.66819500  |
| C  | 3.65098900  | 0.17468700  | 2.25628400  |
| C  | 3.82888000  | 1.34643000  | 1.59948000  |
| N  | 2.80628800  | 1.44328800  | 0.63975200  |
| N  | 2.51772300  | -0.44435100 | 1.70287400  |
| C  | 2.69107900  | 2.57897900  | -0.24538000 |
| C  | 3.42975100  | 2.59063500  | -1.45292900 |
| C  | 1.90182500  | 3.68205900  | 0.15399800  |
| C  | 3.33645000  | 3.73105500  | -2.26704100 |
| C  | 1.83877200  | 4.79639800  | -0.69711300 |
| C  | 2.54543600  | 4.82043300  | -1.89956700 |
| H  | 3.88781000  | 3.76575300  | -3.19968800 |
| H  | 1.23911400  | 5.65486500  | -0.41200200 |
| H  | 2.48560600  | 5.68974000  | -2.54688100 |
| C  | 2.06437600  | -1.75238600 | 2.12212500  |
| C  | 1.26317500  | -1.86142900 | 3.28395400  |
| C  | 2.48383000  | -2.88969600 | 1.39211200  |
| C  | 0.86196700  | -3.14327600 | 3.69185800  |
| C  | 2.05190800  | -4.14748000 | 1.84109500  |
| C  | 1.24634800  | -4.27562400 | 2.97294300  |
| H  | 0.24901900  | -3.25696400 | 4.57995400  |
| H  | 2.34437300  | -5.03401900 | 1.29173900  |
| H  | 0.92139400  | -5.25910700 | 3.29763900  |
| C  | 1.17052700  | 3.71542300  | 1.49578600  |
| H  | 1.25787200  | 2.71530100  | 1.93938000  |
| C  | 1.84463800  | 4.70484900  | 2.47677100  |
| H  | 2.89504900  | 4.44267000  | 2.64312800  |
| H  | 1.81064500  | 5.72794200  | 2.08432100  |
| H  | 1.33228200  | 4.69738100  | 3.44693400  |
| C  | -0.33215600 | 4.04665500  | 1.33787000  |
| H  | -0.48003300 | 5.07644300  | 0.99349200  |
| H  | -0.81581200 | 3.39232800  | 0.60244300  |
| H  | -0.85207600 | 3.95484600  | 2.30146400  |
| C  | 0.88819900  | -0.64468300 | 4.13341500  |
| H  | 1.10385700  | 0.25529700  | 3.53967200  |
| C  | -0.60624600 | -0.62051300 | 4.53400400  |
| H  | -0.85021300 | 0.32423000  | 5.03695800  |
| H  | -1.27812200 | -0.74184400 | 3.67585100  |
| H  | -0.84025400 | -1.42748600 | 5.23696600  |
| C  | 1.77149700  | -0.56140900 | 5.40353600  |
| H  | 1.61447700  | -1.44287400 | 6.03612700  |
| H  | 2.83494200  | -0.51606500 | 5.14799100  |
| H  | 1.52226300  | 0.33012000  | 5.99214700  |
| C  | 3.43380900  | -2.77817500 | 0.19917200  |
| H  | 3.31489100  | -1.77406800 | -0.22148700 |
| C  | 3.11786100  | -3.78131700 | -0.92897900 |
| H  | 3.34657800  | -4.81276400 | -0.62886800 |
| H  | 2.06479900  | -3.72319100 | -1.22827200 |
| H  | 3.74436200  | -3.55620900 | -1.80109500 |
| C  | 4.90419300  | -2.92702800 | 0.66933600  |
| H  | 5.17279500  | -2.17505200 | 1.42015000  |
| H  | 5.07046300  | -3.91923100 | 1.10730700  |
| H  | 5.58563900  | -2.81549500 | -0.18273400 |
| C  | 4.35190500  | 1.43556800  | -1.84729200 |
| H  | 4.01566700  | 0.54517500  | -1.30474600 |
| C  | 4.30274200  | 1.10494800  | -3.35455100 |
| H  | 3.27793600  | 0.93635100  | -3.69489800 |
| H  | 4.74199500  | 1.90594000  | -3.96147000 |
| H  | 4.87999100  | 0.19420500  | -3.55099000 |
| C  | 5.81336700  | 1.72932300  | -1.42123200 |
| H  | 6.19157600  | 2.62371600  | -1.93157500 |
| H  | 5.89830200  | 1.89363300  | -0.34212200 |
| H  | 6.46223000  | 0.88630200  | -1.68690200 |
| Ni | 0.53172900  | -0.09143200 | -0.44368300 |
| C  | -5.15674300 | 0.43239900  | 0.91565400  |
| C  | -4.19876400 | 0.94999000  | 1.81542100  |
| C  | -4.57286100 | 1.92319900  | 2.74943900  |

|    |             |             |             |
|----|-------------|-------------|-------------|
| C  | -5.89988400 | 2.34840300  | 2.75726700  |
| C  | -6.84381400 | 1.81963300  | 1.85678600  |
| C  | -6.48869900 | 0.84955300  | 0.91969100  |
| C  | -3.16704100 | -0.51821700 | 0.58268600  |
| H  | -3.84852500 | 2.32550600  | 3.45313400  |
| H  | -6.21564200 | 3.10067700  | 3.47465700  |
| H  | -7.87075600 | 2.17155100  | 1.89364700  |
| H  | -7.22162300 | 0.43993800  | 0.23110600  |
| N  | -2.97472200 | 0.33907700  | 1.58518900  |
| N  | -4.46972500 | -0.49138400 | 0.13817600  |
| C  | -5.07441000 | -1.30975700 | -0.90144600 |
| H  | -4.29995200 | -1.71361700 | -1.55254500 |
| H  | -5.64954900 | -2.13583500 | -0.46732500 |
| H  | -5.74267000 | -0.68928700 | -1.50545200 |
| H  | 4.57386600  | 2.11398900  | 1.71620900  |
| H  | 4.21804200  | -0.28073000 | 3.04920700  |
| C  | -1.11353600 | -1.06874400 | -1.10848400 |
| C  | -2.11170100 | -1.43081200 | 0.02229700  |
| C  | -1.05371800 | 0.09001800  | -1.87795200 |
| C  | -0.31194300 | 0.02928400  | -3.26710200 |
| C  | -1.25421300 | -0.59625600 | -4.32702700 |
| H  | -2.17276500 | -0.01984100 | -4.47106200 |
| H  | -0.74568800 | -0.65339600 | -5.29945100 |
| H  | -1.53124800 | -1.61149500 | -4.03042100 |
| C  | 0.95054700  | -0.86050400 | -3.22382700 |
| H  | 1.67581400  | -0.48747400 | -2.48513400 |
| H  | 0.71660500  | -1.89644100 | -2.96965900 |
| H  | 1.44253500  | -0.84210100 | -4.20672800 |
| C  | 0.12819800  | 1.42915800  | -3.75397200 |
| H  | 0.68873000  | 1.33303800  | -4.69262000 |
| H  | -0.71446800 | 2.09975300  | -3.95411500 |
| H  | 0.78233100  | 1.91766000  | -3.02260200 |
| C  | -1.90004700 | 1.36044800  | -1.65255800 |
| H  | -2.24207200 | 1.37956100  | -0.61370700 |
| H  | -1.25262300 | 2.24170500  | -1.75935900 |
| C  | -3.14783300 | 1.58762100  | -2.53650700 |
| H  | -3.77785200 | 0.68736000  | -2.52909600 |
| H  | -2.85459900 | 1.74151600  | -3.58129500 |
| C  | -3.97742700 | 2.79701400  | -2.08080500 |
| H  | -4.30161600 | 2.64902700  | -1.04132000 |
| H  | -3.33564400 | 3.69038100  | -2.07701800 |
| C  | -5.20350900 | 3.05809000  | -2.96302200 |
| H  | -5.88297300 | 2.19601900  | -2.96283700 |
| H  | -5.77247400 | 3.92777800  | -2.61387300 |
| H  | -4.91164100 | 3.24523600  | -4.00390900 |
| H  | -1.51601900 | -1.77313300 | 0.87959700  |
| H  | -2.62530900 | -2.34308200 | -0.31138500 |
| H  | -0.59708800 | -2.40254400 | -1.45425100 |
| O  | -0.12935100 | -3.46564500 | -1.66139800 |
| C  | -0.93621900 | -4.59050800 | -1.88586000 |
| C  | -2.15837300 | -4.25698400 | -2.77184700 |
| C  | -0.07528100 | -5.64208400 | -2.61769000 |
| C  | -1.42333400 | -5.19204000 | -0.54579600 |
| H  | -2.78956800 | -3.49601900 | -2.29554600 |
| H  | -1.82896100 | -3.86100300 | -3.73873700 |
| H  | -2.78253100 | -5.14120200 | -2.95773200 |
| H  | 0.78953000  | -5.91521900 | -2.00232800 |
| H  | -0.63995400 | -6.55700400 | -2.84358500 |
| H  | 0.30083200  | -5.22311000 | -3.55781800 |
| H  | -1.99680300 | -6.11862400 | -0.68817400 |
| H  | -0.56125100 | -5.41029900 | 0.09395700  |
| H  | -2.06112100 | -4.47996100 | -0.00789300 |
| Na | -0.72259900 | 0.84771100  | 1.62631100  |

49

|   |             |             |             |
|---|-------------|-------------|-------------|
| C | -2.30349200 | -0.64161600 | 0.30716000  |
| C | -3.90120400 | -1.96948300 | 1.36225700  |
| C | -4.55948600 | -1.16711300 | 0.49055000  |
| N | -3.59752200 | -0.36265500 | -0.14044600 |
| N | -2.53592200 | -1.65632700 | 1.24596400  |
| C | -3.95880100 | 0.64745600  | -1.11285500 |
| C | -4.47091500 | 1.88223300  | -0.64953700 |
| C | -3.85429000 | 0.34121000  | -2.49011700 |
| C | -4.86897300 | 2.82457200  | -1.61154400 |
| C | -4.26348600 | 1.32129000  | -3.40767000 |
| C | -4.76300100 | 2.55112300  | -2.97499100 |
| H | -5.26370500 | 3.78110500  | -1.28713600 |
| H | -4.19374200 | 1.11973300  | -4.47040100 |

|    |             |             |             |
|----|-------------|-------------|-------------|
| H  | -5.07281900 | 3.29497600  | -3.70220700 |
| C  | -1.50590500 | -2.35504300 | 1.96951800  |
| C  | -1.09052100 | -3.62838100 | 1.49892500  |
| C  | -0.94987100 | -1.76256200 | 3.13320900  |
| C  | -0.05808900 | -4.28222400 | 2.19902300  |
| C  | 0.07843300  | -2.46008100 | 3.79078600  |
| C  | 0.52654800  | -3.70064900 | 3.32721800  |
| H  | 0.28165300  | -5.25630600 | 1.86307200  |
| H  | 0.53417700  | -2.02810300 | 4.67351300  |
| H  | 1.32568900  | -4.21616600 | 3.84942100  |
| C  | -3.38436900 | -1.03043300 | -2.97959600 |
| H  | -2.78539400 | -1.48097000 | -2.18081200 |
| C  | -4.59877300 | -1.95684700 | -3.24238100 |
| H  | -5.20994600 | -2.08285300 | -2.34172400 |
| H  | -5.23978800 | -1.54264500 | -4.03003400 |
| H  | -4.26081000 | -2.94870100 | -3.56676600 |
| C  | -2.48300600 | -0.95554600 | -4.22989600 |
| H  | -3.03078800 | -0.60211200 | -5.11143500 |
| H  | -1.63186900 | -0.28731600 | -4.06612900 |
| H  | -2.09443600 | -1.95286300 | -4.46731800 |
| C  | -1.73138800 | -4.30947400 | 0.28493400  |
| H  | -2.47822400 | -3.62763200 | -0.13211000 |
| C  | -0.70628900 | -4.60550400 | -0.83587300 |
| H  | -1.19882100 | -5.11357500 | -1.67248200 |
| H  | -0.26647800 | -3.68252300 | -1.23690400 |
| H  | 0.10531400  | -5.25364300 | -0.48527900 |
| C  | -2.46778300 | -5.60402000 | 0.70656600  |
| H  | -1.76983700 | -6.34817100 | 1.10755700  |
| H  | -3.21964500 | -5.40012600 | 1.47686900  |
| C  | -2.97502100 | -6.04912600 | -0.15688600 |
| C  | -1.48662600 | -0.44541400 | 3.69490100  |
| H  | -1.92726200 | 0.11182600  | 2.86189500  |
| C  | -0.40074400 | 0.45488200  | 4.31861100  |
| H  | 0.03203400  | 0.01569800  | 5.22538600  |
| H  | 0.40958400  | 0.66314000  | 3.61371200  |
| H  | -0.84292900 | 1.41522400  | 4.60453900  |
| C  | -2.61002900 | -0.73252600 | 4.72540500  |
| H  | -3.42975700 | -1.30825600 | 4.84159300  |
| H  | -2.21851400 | -1.29877400 | 5.57932400  |
| C  | -3.02203000 | 0.21002700  | 5.10357400  |
| C  | -4.65204900 | 2.18956100  | 0.83942300  |
| H  | -4.09347700 | 1.43810900  | 1.40814100  |
| C  | -4.09606700 | 3.57298300  | 1.24499500  |
| H  | -3.03806400 | 3.67100400  | 0.98821900  |
| H  | -4.64219100 | 4.38940400  | 0.75831900  |
| H  | -4.19939900 | 3.71008000  | 2.32780300  |
| C  | -6.14409600 | 2.07724100  | 1.24288200  |
| H  | -6.74782100 | 2.81949700  | 0.70691900  |
| H  | -6.55346300 | 1.08658100  | 1.01594700  |
| H  | -6.26271900 | 2.25712400  | 2.31790000  |
| Ni | -0.72247000 | 0.24503600  | -0.16639500 |
| C  | 5.15578900  | -1.03378100 | -0.50226800 |
| C  | 4.28603400  | -2.13806200 | -0.35773400 |
| C  | 4.69836500  | -3.41281500 | -0.76496600 |
| C  | 5.97418300  | -3.54490000 | -1.30789300 |
| C  | 6.83140200  | -2.43505500 | -1.44434500 |
| C  | 6.43722500  | -1.15974400 | -1.04370900 |
| C  | 3.23376600  | -0.38842000 | 0.39187300  |
| H  | 4.04005100  | -4.27102700 | -0.65538600 |
| H  | 6.31868500  | -4.52307300 | -1.63234200 |
| H  | 7.82050200  | -2.57637200 | -1.87093000 |
| H  | 7.09798800  | -0.30475500 | -1.14780500 |
| N  | 3.09654800  | -1.70509100 | 0.20480700  |
| N  | 4.46278300  | 0.06445400  | -0.01408700 |
| C  | 5.00757200  | 1.42378500  | 0.05338100  |
| H  | 4.31050900  | 2.11339200  | 0.57302000  |
| H  | 5.95776100  | 1.39119700  | 0.59810700  |
| H  | 5.19915300  | 1.78526300  | -0.96346400 |
| H  | -5.60716500 | -1.08427500 | 0.26120000  |
| H  | -4.26029300 | -2.72271800 | 2.04168900  |
| C  | 1.06613200  | 1.13875400  | 0.24092200  |
| C  | 2.19613100  | 0.47061500  | 1.03791900  |
| C  | 0.81633900  | 1.30804700  | -1.12433400 |
| C  | 0.30720600  | 2.70701600  | -1.60240200 |
| C  | 1.51561300  | 3.68227800  | -1.63892800 |
| H  | 2.24699000  | 3.40464300  | -2.40420600 |
| H  | 1.16339700  | 4.69534400  | -1.87831900 |
| H  | 2.02231800  | 3.70625000  | -0.66437400 |
| C  | -0.72961600 | 3.32062300  | -0.63413600 |
| H  | -1.56996900 | 2.63626000  | -0.46486200 |

|    |             |             |             |
|----|-------------|-------------|-------------|
| H  | -0.28984100 | 3.58183700  | 0.33292300  |
| H  | -1.13037200 | 4.24494500  | -1.06860400 |
| C  | -0.36032500 | 2.63322600  | -2.99167100 |
| H  | -0.68960500 | 3.63368800  | -3.29736300 |
| H  | 0.31846100  | 2.26768700  | -3.76849200 |
| H  | -1.24436800 | 1.98475300  | -2.97654400 |
| C  | 1.37990100  | 0.35804500  | -2.18627100 |
| H  | 1.63778000  | -0.59301800 | -1.70736800 |
| H  | 0.57851800  | 0.11579600  | -2.89941300 |
| C  | 2.61895200  | 0.79326900  | -3.00250300 |
| H  | 3.41382000  | 1.11688400  | -2.32133700 |
| H  | 2.38045300  | 1.66007100  | -3.62895100 |
| C  | 3.14101600  | -0.33636100 | -3.90283700 |
| H  | 3.40197800  | -1.20545800 | -3.28313600 |
| H  | 2.33329600  | -0.66624900 | -4.57336300 |
| C  | 4.36014800  | 0.07352500  | -4.73602800 |
| H  | 5.19884600  | 0.35977600  | -4.09001400 |
| H  | 4.70110600  | -0.74817200 | -5.37667300 |
| H  | 4.13102000  | 0.92950900  | -5.38305200 |
| H  | 1.77904300  | -0.09133800 | 1.88880700  |
| H  | 2.67084000  | 1.38775400  | 1.49425100  |
| H  | 0.73057000  | 1.96570000  | 0.86523200  |
| O  | 2.96237500  | 3.10831100  | 1.50856000  |
| C  | 3.19922400  | 4.01008200  | 2.52120800  |
| C  | 3.97090300  | 5.24294300  | 1.97779900  |
| C  | 1.85740400  | 4.50459000  | 3.13040600  |
| C  | 4.04140200  | 3.36777100  | 3.65828100  |
| H  | 4.93232600  | 4.92196900  | 1.55682300  |
| H  | 3.39416500  | 5.70981400  | 1.16997600  |
| H  | 4.17056800  | 6.00528400  | 2.74562600  |
| H  | 1.29530100  | 3.64739200  | 3.52534500  |
| H  | 1.98720600  | 5.23384100  | 3.94420200  |
| H  | 1.24908800  | 4.97053000  | 2.34474800  |
| H  | 4.24940100  | 4.05853700  | 4.48887500  |
| H  | 3.51191800  | 2.49567800  | 4.06511900  |
| H  | 5.00220900  | 3.01857000  | 3.25849700  |
| Na | 0.84298700  | -1.90146900 | 0.48367000  |

Cartesian coordinates for the stationary points given in Fig. S7.

## 50

|   |             |             |             |
|---|-------------|-------------|-------------|
| C | -1.51304900 | -0.61530900 | -0.29902600 |
| C | -3.48300600 | -1.38906500 | 0.07012400  |
| C | -3.66234800 | -0.10996900 | -0.51929900 |
| C | -4.60324300 | -2.15031300 | 0.42425000  |
| C | -4.92807900 | 0.42364600  | -0.76928400 |
| C | -5.87088500 | -1.62227000 | 0.17901700  |
| H | -4.47360000 | -3.12942400 | 0.87792800  |
| C | -6.03108300 | -0.35320700 | -0.40932500 |
| H | -5.05513200 | 1.40147800  | -1.22625900 |
| H | -6.75377400 | -2.19918400 | 0.44596000  |
| H | -7.03309400 | 0.03017200  | -0.58885300 |
| C | -2.02850900 | 1.66045600  | -1.32012900 |
| H | -1.95665000 | 1.58150400  | -2.41402100 |
| H | -2.81857900 | 2.37850300  | -1.07737700 |
| H | -1.07466200 | 2.03011400  | -0.89150200 |
| N | -2.13502600 | -1.67435600 | 0.18927500  |
| C | -0.03667700 | -0.42046700 | -0.41778200 |
| C | 0.78367000  | -1.51626100 | 0.19998500  |
| H | 0.22537800  | 0.58305100  | 0.01578900  |
| H | 0.20864800  | -0.29480100 | -1.48394700 |
| C | 2.05097600  | -1.82073800 | -0.13327300 |
| H | 0.28035100  | -2.06188700 | 0.99100600  |
| N | -2.38483000 | 0.37117600  | -0.73450000 |
| C | 2.83940500  | -2.94290400 | 0.56687000  |
| C | 2.08060900  | -3.54901600 | 1.76310300  |
| C | 3.11987200  | -4.08639200 | -0.44055500 |
| C | 4.18782700  | -2.39562100 | 1.09432600  |
| H | 1.85372700  | -2.78914400 | 2.51893600  |
| H | 1.13628300  | -4.01021400 | 1.45446400  |
| H | 2.69310900  | -4.32644800 | 2.23832600  |
| H | 3.68164300  | -3.73470800 | -1.31281300 |
| H | 3.70744700  | -4.88598300 | 0.03172100  |
| H | 2.17948200  | -4.52024500 | -0.80008400 |
| H | 4.76561000  | -3.19543200 | 1.57783100  |

|   |             |             |             |
|---|-------------|-------------|-------------|
| H | 4.80501500  | -1.98110300 | 0.29023000  |
| H | 4.02187100  | -1.60081000 | 1.83035900  |
| C | 2.75188900  | -1.05727500 | -1.25365500 |
| C | 3.14776000  | 0.39320000  | -0.89939100 |
| H | 2.08006000  | -1.01792100 | -2.12437500 |
| H | 3.64136400  | -1.60114400 | -1.59974300 |
| C | 3.57860100  | 1.21634700  | -2.12248400 |
| H | 2.30762000  | 0.91771800  | -0.42702700 |
| H | 3.96071200  | 0.38213900  | -0.15790200 |
| C | 3.69401600  | 2.70857600  | -1.78908500 |
| H | 4.52332300  | 0.83228200  | -2.54132900 |
| H | 2.82310600  | 1.09139600  | -2.91304600 |
| H | 3.93330000  | 3.30812800  | -2.67813400 |
| H | 2.74344200  | 3.05241500  | -1.36253900 |
| H | 4.48150200  | 2.88885200  | -1.04446800 |
| O | 0.61841000  | 2.43581600  | 0.06900700  |
| C | 0.59376600  | 3.23362500  | 1.18253200  |
| C | 0.50949900  | 4.73386200  | 0.77085200  |
| C | -0.63290000 | 2.91750300  | 2.08996800  |
| C | 1.87894500  | 3.03929600  | 2.03944500  |
| H | 1.37423800  | 4.99120300  | 0.14591600  |
| H | -0.39379100 | 4.89623400  | 0.16816200  |
| H | 0.48219600  | 5.42797000  | 1.62658000  |
| H | -0.60047400 | 1.86573200  | 2.40149000  |
| H | -0.68081100 | 3.54145600  | 2.99689100  |
| H | -1.56339100 | 3.06865400  | 1.52722700  |
| H | 1.90203000  | 3.66364900  | 2.94740100  |
| H | 1.95818600  | 1.98759500  | 2.34278000  |
| H | 2.76367400  | 3.27771700  | 1.43583900  |

## TS<sub>50-51</sub>

|   |             |             |             |
|---|-------------|-------------|-------------|
| C | 1.48024900  | -0.51716500 | 0.41124500  |
| C | 3.44728000  | -1.24481500 | -0.10121400 |
| C | 3.65626100  | -0.10443100 | 0.72316900  |
| C | 4.55550700  | -1.94835100 | -0.58803800 |
| C | 4.93009000  | 0.34089600  | 1.07094200  |
| C | 5.83611400  | -1.50563800 | -0.24535900 |
| H | 4.40809500  | -2.82077600 | -1.21957800 |
| C | 6.02311800  | -0.37737300 | 0.57070200  |
| H | 5.07776500  | 1.21008500  | 1.70774500  |
| H | 6.70609200  | -2.04398500 | -0.61657500 |
| H | 7.03173800  | -0.05615800 | 0.82200900  |
| C | 2.04766100  | 1.56663700  | 1.74720900  |
| H | 1.79732300  | 1.35746800  | 2.79706800  |
| H | 2.91092600  | 2.23939900  | 1.72632700  |
| H | 1.20108900  | 2.05685300  | 1.24867700  |
| N | 2.09865300  | -1.47581600 | -0.27368100 |
| C | 0.04045600  | -0.27836900 | 0.51380500  |
| C | -0.82383600 | -1.31050300 | -0.09197900 |
| H | -0.19253300 | 0.91881900  | -0.00928500 |
| H | -0.23963600 | -0.01478300 | 1.54225200  |
| C | -2.11431400 | -1.58118200 | 0.21010900  |
| H | -0.33610400 | -1.87279800 | -0.88300300 |
| N | 2.38635600  | 0.35167900  | 1.02542200  |
| C | -2.91626900 | -2.68435600 | -0.50475600 |
| C | -2.16421500 | -3.28419500 | -1.70873400 |
| C | -3.21076600 | -3.84070500 | 0.48560700  |
| C | -4.26336500 | -2.12883500 | -1.02935800 |
| H | -1.92052300 | -2.51476300 | -2.44968800 |
| H | -1.22880700 | -3.76621900 | -1.40540600 |
| H | -2.78803100 | -4.04317200 | -2.19974500 |
| H | -3.76689800 | -3.49294100 | 1.36359800  |
| H | -3.80902900 | -4.62889200 | 0.00591400  |
| H | -2.27456800 | -4.28824900 | 0.83890200  |
| H | -4.84805400 | -2.92293300 | -1.51530100 |
| H | -4.87747500 | -1.71478200 | -0.22218800 |
| H | -4.09486100 | -1.33191300 | -1.76282700 |
| C | -2.81613100 | -0.80730500 | 1.32056700  |
| C | -3.23743100 | 0.62690400  | 0.93402300  |
| H | -2.14317700 | -0.73621300 | 2.18913900  |
| H | -3.70016400 | -1.35285000 | 1.68147900  |
| C | -3.79302900 | 1.43856300  | 2.11187500  |
| H | -2.37674000 | 1.16244300  | 0.51527000  |
| H | -3.99359400 | 0.58358300  | 0.13591700  |
| C | -4.08243100 | 2.89449900  | 1.72780200  |
| H | -4.70524600 | 0.96564500  | 2.51018000  |
| H | -3.06064600 | 1.42426700  | 2.93286900  |
| H | -4.44473500 | 3.48119400  | 2.58268200  |

|   |             |            |             |
|---|-------------|------------|-------------|
| H | -3.17256600 | 3.36956700 | 1.34277800  |
| H | -4.84367200 | 2.95085300 | 0.93830200  |
| O | -0.43770600 | 2.21713900 | -0.19146900 |
| C | -0.32882700 | 2.68960300 | -1.49705900 |
| C | -0.50110900 | 4.22625900 | -1.46410800 |
| C | 1.05745400  | 2.35375100 | -2.10315600 |
| C | -1.43252400 | 2.07993500 | -2.39795900 |
| H | -1.47664700 | 4.47913700 | -1.03080300 |
| H | 0.27265300  | 4.67121800 | -0.82628500 |
| H | -0.43404400 | 4.68394100 | -2.46266400 |
| H | 1.20781600  | 1.26855900 | -2.13924000 |
| H | 1.17780800  | 2.74782700 | -3.12340300 |
| H | 1.85142800  | 2.77986300 | -1.47747800 |
| H | -1.38115900 | 2.44324500 | -3.43548900 |
| H | -1.34574000 | 0.98712800 | -2.41073800 |
| H | -2.42115600 | 2.32926100 | -1.99385900 |

## 51

|   |             |             |             |
|---|-------------|-------------|-------------|
| C | -1.37625900 | -0.67703200 | -0.60989700 |
| C | -3.34497900 | -1.24726700 | 0.11261200  |
| C | -3.57869400 | -0.28489700 | -0.91633400 |
| C | -4.45003700 | -1.80748200 | 0.77044800  |
| C | -4.85507900 | 0.11871100  | -1.28731000 |
| C | -5.73961400 | -1.40366500 | 0.40019800  |
| H | -4.29324600 | -2.54182600 | 1.55688200  |
| C | -5.94649200 | -0.45577400 | -0.61012800 |
| H | -5.01733000 | 0.85346600  | -2.07405700 |
| H | -6.59975600 | -1.83574400 | 0.90969900  |
| H | -6.95822200 | -0.15803200 | -0.87797500 |
| C | -1.98692400 | 1.12520400  | -2.28539500 |
| H | -1.41206700 | 0.75203800  | -3.14410500 |
| H | -2.91167900 | 1.57134200  | -2.66131000 |
| H | -1.39780200 | 1.90226600  | -1.78129600 |
| N | -2.00421900 | -1.47016600 | 0.28585000  |
| C | 0.01413100  | -0.52460000 | -0.79781500 |
| C | 0.95511200  | -1.34062200 | -0.08392100 |
| H | 0.07465400  | 1.34229700  | 0.10372600  |
| H | 0.34273000  | 0.04738400  | -1.66168500 |
| C | 2.30914300  | -1.43488700 | -0.24864600 |
| H | 0.48093800  | -1.95443800 | 0.67824400  |
| N | -2.31321600 | 0.05942800  | -1.36804800 |
| C | 3.17712500  | -2.41193800 | 0.56088100  |
| C | 2.39897800  | -3.09971000 | 1.69978800  |
| C | 3.72440100  | -3.53172900 | -0.36528000 |
| C | 4.38376500  | -1.68167300 | 1.20350400  |
| H | 1.97867300  | -2.36610700 | 2.39681200  |
| H | 1.57226100  | -3.70748800 | 1.31704400  |
| H | 3.06795800  | -3.76232500 | 2.26564700  |
| H | 4.31814700  | -3.12125700 | -1.19049200 |
| H | 4.36916400  | -4.23055500 | 0.18849400  |
| H | 2.89648400  | -4.10170300 | -0.80242200 |
| H | 5.02096800  | -2.38599600 | 1.75842600  |
| H | 5.01268500  | -1.19302700 | 0.45079600  |
| H | 4.03997500  | -0.91019800 | 1.90279800  |
| C | 2.99640500  | -0.59359700 | -1.31381700 |
| C | 3.24430600  | 0.88125200  | -0.92316500 |
| H | 2.38694900  | -0.59879600 | -2.23227800 |
| H | 3.96118100  | -1.03568500 | -1.60535700 |
| C | 3.81771100  | 1.73041600  | -2.06562200 |
| H | 2.30585200  | 1.33051500  | -0.57886900 |
| H | 3.93129700  | 0.92076800  | -0.06548600 |
| C | 4.02818000  | 3.19766900  | -1.67361300 |
| H | 4.77167200  | 1.29978000  | -2.40862000 |
| H | 3.13682900  | 1.68056800  | -2.92833900 |
| H | 4.41936000  | 3.79309300  | -2.50932100 |
| H | 3.08409200  | 3.65036000  | -1.34733600 |
| H | 4.73870400  | 3.28537700  | -0.84105900 |
| O | 0.09790900  | 2.30967400  | 0.32326700  |
| C | -0.13173800 | 2.46271900  | 1.72673100  |
| C | -0.16667400 | 3.97739400  | 1.96480000  |
| C | -1.47405300 | 1.82163800  | 2.11915700  |
| C | 1.02422700  | 1.82058200  | 2.51538200  |
| H | 0.77623100  | 4.43277000  | 1.64029400  |
| H | -0.97975300 | 4.43166300  | 1.38712000  |
| H | -0.32040900 | 4.20952100  | 3.02583900  |
| H | -1.47070000 | 0.74450300  | 1.91799400  |
| H | -1.68986600 | 1.97139600  | 3.18555800  |
| H | -2.28903100 | 2.26660900  | 1.53723000  |
| H | 0.87915700  | 1.92462600  | 3.59898900  |

|   |            |            |            |
|---|------------|------------|------------|
| H | 1.09926400 | 0.75373000 | 2.27778000 |
| H | 1.97577000 | 2.29260300 | 2.24453800 |

## 52

|   |             |             |             |
|---|-------------|-------------|-------------|
| C | -1.62031300 | 0.71346600  | -0.49368400 |
| C | -3.53325300 | -0.31127400 | -0.66862400 |
| C | -3.83123700 | 0.95426000  | -0.07624200 |
| C | -4.59115700 | -1.20189300 | -0.90779800 |
| C | -5.11886900 | 1.33281500  | 0.27893900  |
| C | -5.89404000 | -0.82229900 | -0.55743700 |
| H | -4.38857900 | -2.17017600 | -1.35891600 |
| C | -6.16269600 | 0.42198900  | 0.02590100  |
| H | -5.32481600 | 2.29622800  | 0.74236500  |
| H | -6.71615700 | -1.51266200 | -0.74124500 |
| H | -7.18301100 | 0.69010000  | 0.29231900  |
| C | -2.36986900 | 2.92977900  | 0.49597400  |
| H | -1.67239000 | 3.45200600  | -0.17038600 |
| H | -3.31410300 | 3.48322200  | 0.51002200  |
| H | -1.94378900 | 2.94344900  | 1.51103700  |
| N | -2.19307000 | -0.44132100 | -0.91005200 |
| C | -0.25992800 | 1.05632300  | -0.52729900 |
| C | 0.70610500  | 0.23741100  | -1.18489900 |
| H | 1.56823200  | -1.26432100 | 0.41617000  |
| H | 0.04273200  | 1.99347900  | -0.07103800 |
| C | 2.06189000  | 0.42961800  | -1.30219300 |
| H | 0.26826400  | -0.63962500 | -1.65713500 |
| N | -2.60413900 | 1.59466400  | 0.01470500  |
| C | 2.96615000  | -0.48043000 | -2.15272500 |
| C | 2.25603000  | -1.77293500 | -2.60300700 |
| C | 3.42101900  | 0.27433500  | -3.43063900 |
| C | 4.22757700  | -0.90797700 | -1.35821500 |
| H | 1.91938900  | -2.35698300 | -1.74025100 |
| H | 1.38711000  | -1.56289000 | -3.23618500 |
| H | 2.94849700  | -2.39579500 | -3.18556400 |
| H | 3.95752400  | 1.19943600  | -3.18701900 |
| H | 4.09421200  | -0.34563500 | -4.04154700 |
| H | 2.55335700  | 0.54462000  | -4.04407400 |
| H | 4.89046700  | -1.52396700 | -1.98351900 |
| H | 4.81030500  | -0.04235500 | -1.02116300 |
| H | 3.94526200  | -1.49274300 | -0.47631900 |
| C | 2.69382000  | 1.66372200  | -0.67659300 |
| C | 2.90193400  | 1.58832500  | 0.85250000  |
| H | 2.06603000  | 2.54633600  | -0.88622800 |
| H | 3.66658600  | 1.88272400  | -1.14027500 |
| C | 3.52880700  | 2.85767400  | 1.44438100  |
| H | 1.93287900  | 1.40133400  | 1.33238200  |
| H | 3.52946100  | 0.72005100  | 1.09411000  |
| C | 3.72307300  | 2.78984700  | 2.96370500  |
| H | 4.50014200  | 3.04522400  | 0.96121700  |
| H | 2.89763400  | 3.72426200  | 1.19635600  |
| H | 4.17233400  | 3.71007900  | 3.35995500  |
| H | 2.76487300  | 2.63797500  | 3.47625200  |
| H | 4.37681000  | 1.95282300  | 3.24028100  |
| O | 1.87530700  | -2.00295900 | 0.98074300  |
| C | 0.79529400  | -2.44371400 | 1.81475400  |
| C | 1.41597000  | -3.51920100 | 2.71485300  |
| C | 0.27351100  | -1.26674300 | 2.65546900  |
| C | -0.33532500 | -3.04035200 | 0.95911900  |
| H | 1.81752300  | -4.33661700 | 2.10476300  |
| H | 2.24050800  | -3.09565500 | 3.30005000  |
| H | 0.67160300  | -3.93315500 | 3.40556200  |
| H | -0.11521900 | -0.47880600 | 1.99987100  |
| H | -0.53573400 | -1.58197200 | 3.32680200  |
| H | 1.08523300  | -0.84605600 | 3.26144500  |
| H | -1.12792400 | -3.46031700 | 1.59294500  |
| H | -0.79590800 | -2.28406900 | 0.31180000  |
| H | 0.06169900  | -3.84574900 | 0.32922200  |

## TS<sub>52-53</sub>

|   |            |             |             |
|---|------------|-------------|-------------|
| C | 2.05891900 | 0.14565700  | 0.38917400  |
| C | 3.96702800 | -0.81368700 | 0.06117100  |
| C | 4.21337500 | 0.58204500  | -0.06446200 |
| C | 5.03260600 | -1.70990300 | -0.10190000 |
| C | 5.47776000 | 1.09835300  | -0.33746300 |
| C | 6.30239900 | -1.19917600 | -0.38048200 |
| H | 4.85841000 | -2.77862500 | -0.01152900 |



|   |             |             |             |
|---|-------------|-------------|-------------|
| C | 6.52571900  | 0.18301100  | -0.49770400 |
| H | 5.65624400  | 2.16818300  | -0.42034400 |
| H | 7.13758500  | -1.88461200 | -0.50918900 |
| H | 7.52637400  | 0.55097000  | -0.71255000 |
| C | 2.69674700  | 2.59187500  | 0.05830100  |
| H | 2.65466500  | 3.06412100  | 1.04957000  |
| H | 3.48028000  | 3.08168700  | -0.52712800 |
| H | 1.74028900  | 2.75623100  | -0.44605600 |
| N | 2.64342900  | -1.05192600 | 0.34191500  |
| C | 0.68147200  | 0.42982100  | 0.67719000  |
| C | -0.26409100 | -0.55423700 | 0.83368200  |
| H | -2.23991100 | -0.56854700 | -0.12019000 |
| H | 0.40791000  | 1.47336900  | 0.79063000  |
| C | -1.68586100 | -0.41187200 | 1.06299900  |
| H | 0.11859700  | -1.56380200 | 0.69641000  |
| N | 2.97915100  | 1.17639000  | 0.13743700  |
| C | -2.35087100 | -1.58571700 | 1.87590600  |
| C | -1.91233300 | -2.96245600 | 1.33104900  |
| C | -1.97031700 | -1.50872400 | 3.37201300  |
| C | -3.89117100 | -1.52995900 | 1.73338900  |
| H | -2.10449500 | -3.02500800 | 0.25560500  |
| H | -0.85118000 | -3.16947300 | 1.50855900  |
| H | -2.48217900 | -3.76056300 | 1.82661400  |
| H | -2.29539500 | -0.56224300 | 3.82136700  |
| H | -2.43939800 | -2.32346900 | 3.94359700  |
| H | -0.88365000 | -1.58454000 | 3.50413500  |
| H | -4.34886800 | -2.39601100 | 2.23293900  |
| H | -4.31987900 | -0.63212500 | 2.19428700  |
| H | -4.16298000 | -1.53251900 | 0.67306500  |
| C | -2.11818600 | 0.99906300  | 1.53243800  |
| C | -2.40751700 | 2.00864400  | 0.40549500  |
| H | -1.35779400 | 1.42503800  | 2.21025300  |
| H | -3.03096300 | 0.92366100  | 2.13591300  |
| C | -2.91924500 | 3.35796000  | 0.92548800  |
| H | -1.49949400 | 2.17455700  | -0.19135100 |
| H | -3.13061800 | 1.55390500  | -0.28148400 |
| C | -3.19682400 | 4.37098500  | -0.19167500 |
| H | -3.84046600 | 3.19804500  | 1.50635700  |
| H | -2.19047600 | 3.78636800  | 1.63165600  |
| H | -3.57208300 | 5.32471100  | 0.20300700  |
| H | -2.28600100 | 4.58300300  | -0.76649500 |
| H | -3.94231100 | 3.98206300  | -0.89633800 |
| O | -3.11907500 | -0.67541300 | -1.15760900 |
| C | -2.64013500 | -0.86508500 | -2.44613100 |
| C | -3.84573600 | -0.75350800 | -3.41206800 |
| C | -1.58974000 | 0.20674500  | -2.83866600 |
| C | -2.00108300 | -2.26905700 | -2.61422000 |
| H | -4.60137400 | -1.50174800 | -3.14281600 |
| H | -4.30686600 | 0.23653300  | -3.31026900 |
| H | -3.56526300 | -0.90259500 | -4.46608200 |
| H | -0.72903200 | 0.16288600  | -2.16112300 |
| H | -1.22136800 | 0.07685900  | -3.86750100 |
| H | -2.03170200 | 1.20731800  | -2.75644400 |
| H | -1.67393400 | -2.46864600 | -3.64596000 |
| H | -1.12756800 | -2.36813100 | -1.95908100 |
| H | -2.72805100 | -3.03944900 | -2.32777400 |

### 53

|   |             |             |             |
|---|-------------|-------------|-------------|
| C | -2.43908800 | 0.02240400  | -0.21632800 |
| C | -4.23795100 | -0.94561400 | 0.46800200  |
| C | -4.57117700 | 0.42655700  | 0.31963300  |
| C | -5.21697900 | -1.84728700 | 0.90678700  |
| C | -5.84743600 | 0.92087400  | 0.58965500  |
| C | -6.49382300 | -1.35979000 | 1.18229800  |
| H | -4.97099400 | -2.89859800 | 1.02549000  |
| C | -6.80641400 | 0.00366600  | 1.02678600  |
| H | -6.09637500 | 1.97175000  | 0.46440700  |
| H | -7.26631400 | -2.04475900 | 1.52396200  |
| H | -7.81272400 | 0.35120500  | 1.24763500  |
| C | -3.23401900 | 2.44711700  | -0.36633100 |
| H | -3.42043000 | 2.70026300  | -1.41841700 |
| H | -3.93430800 | 3.01015500  | 0.25764900  |
| H | -2.22064700 | 2.75785000  | -0.10371300 |
| N | -2.92181000 | -1.16311300 | 0.12727300  |
| C | -1.09162400 | 0.30844300  | -0.67218000 |
| C | -0.08735900 | -0.59528300 | -0.62325900 |
| H | 1.96998100  | -0.50625700 | -0.11524000 |
| H | -0.91041100 | 1.30257000  | -1.06681400 |
| C | 1.33715500  | -0.41128500 | -1.03658500 |

|   |             |             |             |
|---|-------------|-------------|-------------|
| H | -0.34803200 | -1.56272800 | -0.19897100 |
| N | -3.40239900 | 1.03141300  | -0.10879600 |
| C | 1.85713700  | -1.60321800 | -1.94051900 |
| C | 1.68315500  | -2.93779100 | -1.18289400 |
| C | 1.10182900  | -1.66692700 | -3.28181400 |
| C | 3.37500200  | -1.42959800 | -2.18648500 |
| H | 2.18533900  | -2.87892400 | -0.21063000 |
| H | 0.63218100  | -3.20485900 | -1.02229100 |
| H | 2.13960200  | -3.75773900 | -1.75341500 |
| H | 1.21657800  | -0.73327800 | -3.84703000 |
| H | 1.48878100  | -2.48212800 | -3.90928600 |
| H | 0.02749000  | -1.83740300 | -3.13374900 |
| H | 3.79632500  | -2.36164100 | -2.58961600 |
| H | 3.58661000  | -0.64384900 | -2.92241200 |
| H | 3.86970700  | -1.17466200 | -1.23756400 |
| C | 1.64039600  | 0.99731100  | -1.60045400 |
| C | 1.88140300  | 2.03473400  | -0.48993100 |
| H | 0.84716100  | 1.33266800  | -2.28924200 |
| H | 2.55356000  | 0.95438500  | -2.20135500 |
| C | 2.28843400  | 3.41288700  | -1.02472100 |
| H | 0.98063400  | 2.14206100  | 0.13351200  |
| H | 2.66544500  | 1.61531500  | 0.15847700  |
| C | 2.53935900  | 4.43681600  | 0.08880700  |
| H | 3.20034800  | 3.30899600  | -1.63135800 |
| H | 1.51455500  | 3.80035400  | -1.70792900 |
| H | 2.84525400  | 5.41265300  | -0.31182900 |
| H | 1.63552400  | 4.59260900  | 0.69263300  |
| H | 3.32720600  | 4.08719100  | 0.76652100  |
| O | 3.65304400  | -0.33889200 | 0.75595700  |
| C | 4.20328200  | -0.60210900 | 1.97128100  |
| C | 5.56753400  | 0.14183100  | 2.11678400  |
| C | 3.27394800  | -0.13510000 | 3.13321500  |
| C | 4.47102500  | -2.12796200 | 2.15911400  |
| H | 6.23615300  | -0.17390300 | 1.30535500  |
| H | 5.40294300  | 1.22171100  | 2.00610300  |
| H | 6.07807100  | -0.03526700 | 3.07818100  |
| H | 2.30778900  | -0.65030100 | 3.05497800  |
| H | 3.68547000  | -0.32389900 | 4.13864000  |
| H | 3.08310100  | 0.94170000  | 3.03659800  |
| H | 4.94100000  | -2.38571300 | 3.12281300  |
| H | 3.52212500  | -2.67558900 | 2.08476800  |
| H | 5.12367500  | -2.48294800 | 1.35099000  |

Cartesian coordinates for the stationary points given in Fig. S8.

### 54

|   |             |             |             |
|---|-------------|-------------|-------------|
| C | -1.81002100 | -0.86882200 | -0.81709800 |
| C | -2.41507600 | -2.91284700 | -0.54336300 |
| C | -3.60757600 | -2.14298200 | -0.55504500 |
| C | -2.48915900 | -4.30159000 | -0.38425800 |
| C | -4.86955300 | -2.72407700 | -0.41785300 |
| C | -3.74690800 | -4.88822200 | -0.24493400 |
| H | -1.57980900 | -4.89662400 | -0.37295800 |
| C | -4.92040700 | -4.11053100 | -0.26111900 |
| H | -5.77768300 | -2.12723300 | -0.43294900 |
| H | -3.82576600 | -5.96614100 | -0.12143500 |
| H | -5.88643700 | -4.59814100 | -0.15093000 |
| C | -4.03688100 | 0.35533000  | -0.75422900 |
| H | -4.30909100 | 0.60858100  | -1.78838200 |
| H | -4.95476000 | 0.14046700  | -0.19827000 |
| H | -3.51760100 | 1.20326300  | -0.26382900 |
| N | -1.31546000 | -2.09003500 | -0.71047700 |
| C | -1.04330800 | 0.39760300  | -1.01302900 |
| C | 0.44631000  | 0.22086100  | -1.06476500 |
| H | -1.34915700 | 1.10978800  | -0.19719600 |
| H | -1.41623100 | 0.89417300  | -1.92355600 |
| C | 1.31948900  | 1.14196300  | -1.50278600 |
| H | 0.82140700  | -0.72526600 | -0.69435900 |
| N | -3.19147400 | -0.83498600 | -0.71919200 |
| C | 2.83491600  | 0.87727400  | -1.47509700 |
| C | 3.35024000  | 0.64104800  | -2.91056700 |
| C | 3.59210100  | 2.06264100  | -0.84190000 |
| H | 3.12108300  | 1.48675000  | -3.56762700 |

|    |             |             |             |
|----|-------------|-------------|-------------|
| H  | 4.43653500  | 0.48991400  | -2.90196000 |
| H  | 2.87626800  | -0.25649500 | -3.31878500 |
| H  | 4.66776600  | 1.85292600  | -0.82147800 |
| H  | 3.43668500  | 2.98508300  | -1.40977500 |
| H  | 3.24907200  | 2.24752700  | 0.18189200  |
| C  | 0.84080300  | 2.45947100  | -2.10078100 |
| C  | 0.32137500  | 3.49580400  | -1.08129000 |
| H  | 0.01959500  | 2.24102100  | -2.79995500 |
| H  | 1.62900800  | 2.91685700  | -2.71541400 |
| C  | -0.35004300 | 4.70416200  | -1.75112700 |
| H  | -0.41527400 | 3.03564300  | -0.40972400 |
| H  | 1.15239700  | 3.84068900  | -0.44738300 |
| C  | -1.11695000 | 5.56174800  | -0.73792200 |
| H  | 0.39001800  | 5.31001000  | -2.29934100 |
| H  | -1.06090500 | 4.33630000  | -2.50637100 |
| H  | -1.64969000 | 6.39024000  | -1.22445300 |
| H  | -1.83766300 | 4.92642200  | -0.20909600 |
| H  | -0.43890800 | 5.99528100  | 0.00984800  |
| O  | -2.30138000 | 2.45816800  | 0.72031300  |
| C  | -2.44817800 | 2.56622000  | 2.07898300  |
| C  | -3.69061300 | 3.44227800  | 2.41996200  |
| C  | -2.64557400 | 1.17473100  | 2.75118000  |
| C  | -1.19949100 | 3.23049700  | 2.73033600  |
| H  | -3.57163600 | 4.43725400  | 1.97228100  |
| H  | -4.58960800 | 2.98827600  | 1.98269900  |
| H  | -3.85978200 | 3.56715900  | 3.50178000  |
| H  | -1.78188000 | 0.53379700  | 2.53308500  |
| H  | -2.76242400 | 1.22961900  | 3.84529100  |
| H  | -3.53697700 | 0.68245300  | 2.34133800  |
| H  | -1.27977300 | 3.33623100  | 3.82415200  |
| H  | -0.30892100 | 2.62797400  | 2.50896800  |
| H  | -1.04234100 | 4.22706600  | 2.29910300  |
| O  | 3.15918700  | -0.34038000 | -0.79012000 |
| Si | 3.36095500  | -0.74749200 | 0.86022400  |
| C  | 3.52228300  | -2.68109800 | 0.78835400  |
| C  | 1.93388000  | -0.20897200 | 2.00091100  |
| H  | 2.20145000  | -0.39888500 | 3.04804000  |
| H  | 1.71549900  | 0.85924000  | 1.89921100  |
| H  | 1.00571300  | -0.74511300 | 1.78143500  |
| C  | 4.98391100  | 0.00027100  | 1.55513200  |
| H  | 5.24680600  | -0.47731700 | 2.50775300  |
| H  | 5.82221200  | -0.14533200 | 0.86512300  |
| H  | 4.88457700  | 1.07467200  | 1.74226400  |
| C  | 3.52586800  | -3.26040900 | 2.21719000  |
| H  | 2.58882600  | -3.04709100 | 2.74535700  |
| H  | 3.64045200  | -4.35436800 | 2.18309900  |
| H  | 4.35184900  | -2.86611000 | 2.82448100  |
| C  | 2.33895500  | -3.27594000 | -0.00139300 |
| H  | 2.32945100  | -2.91172700 | -1.03318000 |
| H  | 2.41828500  | -4.37407800 | -0.02801500 |
| H  | 1.36537000  | -3.02478100 | 0.43419100  |
| C  | 4.83639600  | -3.06502000 | 0.07921200  |
| H  | 4.87692700  | -2.64787700 | -0.93350500 |
| H  | 5.71970500  | -2.71179300 | 0.62690900  |
| H  | 4.91859600  | -4.15956500 | -0.00548500 |

## TS<sub>54-55</sub>

|   |             |             |             |
|---|-------------|-------------|-------------|
| C | -2.01591800 | -0.42883100 | -0.82097000 |
| C | -2.95398900 | -2.36570800 | -0.62890000 |
| C | -4.01557500 | -1.43011500 | -0.77069400 |
| C | -3.25512800 | -3.72616600 | -0.49387800 |
| C | -5.35408600 | -1.81699200 | -0.78556100 |
| C | -4.59566900 | -4.12114000 | -0.50528500 |
| H | -2.45198600 | -4.45022200 | -0.38363600 |
| C | -5.63133100 | -3.18257800 | -0.64794600 |
| H | -6.15732900 | -1.09328400 | -0.90258500 |
| H | -4.84385800 | -5.17570700 | -0.40243000 |
| H | -6.66570800 | -3.51955300 | -0.65500500 |
| C | -4.03954500 | 1.09895100  | -0.95012000 |
| H | -4.11956600 | 1.45241500  | -1.98812000 |
| H | -5.04934200 | 1.01341000  | -0.53609300 |
| H | -3.46781600 | 1.81796100  | -0.34928600 |
| N | -1.73540200 | -1.72065900 | -0.66591900 |
| C | -1.07317600 | 0.68833600  | -0.87484900 |
| C | 0.34839800  | 0.31096100  | -0.98241600 |
| H | -1.33661300 | 1.47976400  | 0.16954500  |
| H | -1.38407700 | 1.42460200  | -1.62850700 |
| C | 1.36482800  | 1.07009800  | -1.44385000 |

|    |             |             |             |
|----|-------------|-------------|-------------|
| H  | 0.58335300  | -0.69267400 | -0.64431600 |
| N  | -3.39251600 | -0.19958400 | -0.87522200 |
| C  | 2.79352900  | 0.51171200  | -1.55062400 |
| C  | 3.11277400  | 0.19078400  | -3.02771400 |
| C  | 3.84105200  | 1.50900300  | -1.01291400 |
| H  | 2.98517300  | 1.07186300  | -3.66650400 |
| H  | 4.14492300  | -0.16806800 | -3.13005100 |
| H  | 2.43305300  | -0.59189400 | -3.37661300 |
| H  | 4.85207900  | 1.10293400  | -1.13456100 |
| H  | 3.79451400  | 2.45880000  | -1.55429600 |
| H  | 3.67184600  | 1.72951400  | 0.04655400  |
| C  | 1.11475300  | 2.47370900  | -1.97860800 |
| C  | 0.90703900  | 3.54582100  | -0.88816400 |
| H  | 0.21212800  | 2.45930900  | -2.60885200 |
| H  | 1.92848400  | 2.79312100  | -2.64656200 |
| C  | 0.53911700  | 4.92397400  | -1.45422100 |
| H  | 0.10796800  | 3.22160400  | -0.21014900 |
| H  | 1.82037000  | 3.63469700  | -0.28039400 |
| C  | 0.20060100  | 5.93507700  | -0.35276800 |
| H  | 1.35623900  | 5.31152600  | -2.08378100 |
| H  | -0.33116800 | 4.81538000  | -2.11828900 |
| H  | -0.09413400 | 6.90883600  | -0.76624900 |
| H  | -0.62453300 | 5.55755300  | 0.26239800  |
| H  | 1.05975300  | 6.10130000  | 0.31070200  |
| O  | -1.79832700 | 2.47598400  | 0.91131100  |
| C  | -1.82308600 | 2.31367000  | 2.29519600  |
| C  | -2.88535700 | 3.27923400  | 2.87238200  |
| C  | -2.19478100 | 0.86401000  | 2.69390300  |
| C  | -0.44553000 | 2.66806700  | 2.90870500  |
| H  | -2.64908100 | 4.30739200  | 2.57166000  |
| H  | -3.87399900 | 3.03153200  | 2.46679100  |
| H  | -2.94177600 | 3.24117500  | 3.97061500  |
| H  | -1.45783800 | 0.15426600  | 2.29979100  |
| H  | -2.24532700 | 0.73120700  | 3.78441600  |
| H  | -3.17010200 | 0.59467000  | 2.27115300  |
| H  | -0.42953700 | 2.56916000  | 4.00453800  |
| H  | 0.32804500  | 2.01232500  | 2.49344800  |
| H  | -0.18030000 | 3.70087000  | 2.65122300  |
| O  | 2.92351600  | -0.75923100 | -0.88918200 |
| Si | 3.35149000  | -1.22116700 | 0.69573000  |
| C  | 2.85476000  | -3.09768100 | 0.79092700  |
| C  | 2.47895100  | -0.22241900 | 2.06365200  |
| H  | 2.65951400  | -0.67888200 | 3.04528900  |
| H  | 2.83843800  | 0.81129000  | 2.10760700  |
| H  | 1.39906600  | -0.18612200 | 1.89529700  |
| C  | 5.24689200  | -1.05866900 | 0.94091500  |
| H  | 5.54790200  | -1.45347700 | 1.91887400  |
| H  | 5.79654800  | -1.61264200 | 0.17103000  |
| H  | 5.56829600  | -0.01299400 | 0.89359800  |
| C  | 3.54365700  | -3.75523800 | 2.00503100  |
| H  | 3.27449700  | -3.26313600 | 2.94908600  |
| H  | 3.23343900  | -4.80753800 | 2.08973500  |
| H  | 4.63743800  | -3.74220700 | 1.91906000  |
| C  | 1.32732300  | -3.24817300 | 0.94794800  |
| H  | 0.75952000  | -2.79867800 | 0.12695900  |
| H  | 1.06098100  | -4.31608600 | 0.98526600  |
| H  | 0.96743200  | -2.79319600 | 1.87882100  |
| C  | 3.30487600  | -3.81707100 | -0.49583200 |
| H  | 2.83799800  | -3.37204900 | -1.37963200 |
| H  | 4.39400400  | -3.77154600 | -0.63142700 |
| H  | 3.02186600  | -4.88024300 | -0.45545000 |

## 55

|   |             |             |             |
|---|-------------|-------------|-------------|
| C | -1.63324000 | -0.59436700 | -1.06086600 |
| C | -2.37771900 | -2.54972500 | -0.45213000 |
| C | -3.48913000 | -1.88311800 | -1.05087700 |
| C | -2.55968600 | -3.85080000 | 0.03808600  |
| C | -4.74339900 | -2.47048400 | -1.15951800 |
| C | -3.82173700 | -4.44937100 | -0.07282600 |
| H | -1.72510800 | -4.37689000 | 0.49515200  |
| C | -4.90031400 | -3.77643200 | -0.66009400 |
| H | -5.58301000 | -1.94771500 | -1.61392500 |
| H | -3.96665400 | -5.45963100 | 0.30681500  |
| H | -5.87075600 | -4.26298900 | -0.73248700 |
| C | -3.73068700 | 0.43369300  | -2.04342200 |
| H | -3.24275700 | 0.76653100  | -2.96920000 |
| H | -4.73752600 | 0.08709400  | -2.29185500 |
| H | -3.80476900 | 1.28990700  | -1.36060600 |

N -1.26380200 -1.75037300 -0.45663000  
C -0.83542100 0.54608900 -1.28132700  
C 0.58639400 0.48611100 -1.10563300  
H -1.93851600 1.61305100 0.28627200  
H -1.28305500 1.39391400 -1.79402000  
C 1.52607400 1.46027300 -1.26268500  
H 0.94435300 -0.49609800 -0.81857200  
N -2.99141900 -0.64740200 -1.43699300  
C 3.02257500 1.15974000 -1.10085500  
C 3.73178500 1.19178100 -2.47422100  
C 3.70862400 2.17049600 -0.15516800  
H 3.59152300 2.15524200 -2.97712000  
H 4.80900400 1.01302600 -2.35938400  
H 3.31210500 0.40573200 -3.10876500  
H 4.77652500 1.93943200 -0.05551500  
H 3.61574900 3.19382100 -0.53473900  
H 3.24930800 2.14713500 0.83957800  
C 1.12519900 2.86454600 -1.68345800  
C 0.52316400 3.73051200 -0.55557500  
H 0.37638300 2.80142500 -2.48998200  
H 1.97604600 3.40703500 -2.12299700  
C -0.00645600 5.08941300 -1.03304100  
H -0.29860400 3.17975500 -0.08552300  
H 1.27697400 3.88990800 0.22950600  
C -0.72582100 5.86668700 0.07570800  
H 0.81979600 5.69371700 -1.43916300  
H -0.70364400 4.92860100 -1.86851200  
H -1.11179400 6.83012900 -0.28283100  
H -1.56984300 5.28262400 0.46150500  
H -0.05101100 6.07084900 0.91766300  
O -2.58323300 2.22745800 0.71347800  
C -2.79314700 1.82421400 2.07205500  
C -3.90950900 2.73861000 2.59080100  
C -3.22673700 0.35079500 2.13190300  
C -1.50313700 2.03883700 2.88266800  
H -3.60849700 3.78963700 2.51063000  
H -4.81916300 2.59887100 1.99610300  
H -4.14176100 2.52114900 3.64027800  
H -2.44944500 -0.30374000 1.72236700  
H -3.42632500 0.03819200 3.16520400  
H -4.13736700 0.19566400 1.54352100  
H -1.64534000 1.78165000 3.94052500  
H -0.69768000 1.41058500 2.48714800  
H -1.18405400 3.08533700 2.81819900  
O 3.26902900 -0.17842800 -0.63462900  
Si 3.20709800 -0.95037800 0.88622600  
C 3.34564200 -2.82845000 0.41268400  
C 1.64405700 -0.61365800 1.92103200  
H 1.76315200 -1.04302400 2.92448200  
H 1.47744400 0.46317300 2.03236900  
H 0.74757700 -1.04040900 1.45834100  
C 4.72622000 -0.45123100 1.94926200  
H 4.82349400 -1.11572000 2.81754300  
H 5.65690800 -0.51208300 1.37427600  
H 4.63196500 0.57291300 2.32678800  
C 3.12977500 -3.70089000 1.66548800  
H 2.12665100 -3.56452300 2.08646200  
H 3.23433500 -4.76616100 1.40879700  
H 3.86109700 -3.48385100 2.45649800  
C 2.27753500 -3.17875300 -0.64384900  
H 2.44507600 -2.61547000 -1.56759300  
H 2.32760400 -4.25212600 -0.88674600  
H 1.25644900 -2.95553800 -0.31242400  
C 4.74249800 -3.11484700 -0.17324600  
H 4.93876500 -2.48937900 -1.05166300  
H 5.54251400 -2.93355100 0.55662300  
H 4.81627200 -4.16775300 -0.48698600

H -5.38556900 -3.13185200 -1.23325500  
C -7.84774300 -0.94734300 -0.25825100  
H -7.56149900 1.14539700 0.25482300  
H -7.84272000 -3.03064900 -0.80505600  
H -8.91949600 -0.92310100 -0.07221200  
C -4.84138400 2.47955800 0.08725100  
H -4.27843100 3.10281200 -0.61838600  
H -5.89630900 2.76521300 0.03273900  
H -4.47363600 2.69888300 1.10119000  
N -3.73074900 -0.86006500 -0.90502000  
C -2.26547900 1.11426400 -0.61863600  
C -1.07117800 0.47823000 -1.04116700  
H 1.54843800 -1.16876200 0.90479300  
H -2.24785400 2.14757700 -0.28777900  
C 0.20303200 0.99319200 -1.11201100  
H -1.23261300 -0.54825400 -1.36216100  
N -4.70358300 1.08935500 -0.25751400  
C 1.37249300 0.18820700 -1.63593000  
C 1.01576500 -1.25005600 -2.04373300  
C 2.04170800 0.86905400 -2.84811400  
H 0.27370500 -1.26303800 -2.84796700  
H 1.91437700 -1.76533600 -2.39975500  
H 0.62063200 -1.81596800 -1.19774600  
H 2.92973800 0.32013800 -3.18673400  
H 1.32549600 0.89096000 -3.67697800  
H 2.33556800 1.89983800 -2.63764200  
C 0.46022900 2.42188500 -0.66623300  
C 0.46349000 2.63618800 0.86337600  
H -0.30720400 3.08842200 -1.09678700  
H 1.42002200 2.79199000 -1.05365700  
C 0.66608100 4.09992400 1.27612400  
H -0.48552100 2.26920200 1.27528900  
H 1.25282100 2.01552400 1.30692200  
C 0.66717700 4.31003500 2.79501800  
H 1.61450600 4.47090900 0.85732400  
H -0.12380000 4.71833300 0.82392400  
H 0.81319300 5.36491400 3.06227700  
H -0.28136100 3.98117400 3.23804100  
H 1.46781600 3.73077700 3.27267700  
O 1.67136400 -1.90873000 1.53438700  
C 0.49637000 -2.10920000 2.33270400  
C 0.04283300 -0.78076700 2.95608000  
C -0.63313200 -2.71564600 1.48250400  
C 0.93392400 -3.09773000 3.42088200  
H 0.85272200 -0.34118800 3.55052400  
H -0.24083000 -0.06943500 2.17314300  
H -0.82796600 -0.92550300 3.60763000  
H -0.27569000 -3.62117500 0.97865600  
H -1.49724500 -2.98420700 2.10291500  
H -0.98720300 -2.00996500 0.72366000  
H 0.10092600 -3.34001200 4.09103700  
H 1.29479600 -4.02647000 2.96422400  
H 1.75040700 -2.67172900 4.01531600  
O 2.35350100 0.04233900 -0.51857700  
Si 4.02057400 0.30030100 -0.25483100  
C 4.69738600 1.89910200 -1.06765100  
H 5.68347500 2.13627800 -0.64913400  
H 4.80060200 1.82564500 -2.15452000  
H 4.03357000 2.74287200 -0.84886200  
C 4.12423800 0.51118500 1.63623500  
H 3.64383800 1.45054600 1.93375700  
H 3.58831300 -0.30832600 2.12582800  
H 5.15859500 0.53087400 1.99949100  
C 5.13514700 -1.21521600 -0.79251200  
C 6.60167400 -0.91986800 -0.41165500  
H 6.72233800 -0.75023500 0.66522700  
H 7.24143000 -1.77485300 -0.67969300  
H 6.99648400 -0.04095000 -0.93742500  
C 5.07152800 -1.46252000 -2.31106900  
H 5.73606100 -2.29541100 -2.58894100  
H 4.06093900 -1.72909400 -2.63681800  
H 5.39138600 -0.58470400 -2.88752900  
C 4.66909700 -2.48529400 -0.05266900  
H 5.26194900 -3.35421200 -0.37933700  
H 4.79071700 -2.38942800 1.03225400  
H 3.61162100 -2.70354400 -0.23098100

56

C -3.49824200 0.43786600 -0.60926700  
C -5.07457200 -1.05254800 -0.73963600  
C -5.72235500 0.15077400 -0.32233100  
C -5.85637500 -2.20524900 -0.91414200  
C -7.08687000 0.22257800 -0.07464500  
C -7.23453400 -2.13710400 -0.67142400

C 3.38483200 0.56039600 0.51299300  
C 4.89728400 -0.99243100 0.54442400  
C 5.56500300 0.18184700 0.09125100  
C 5.63048100 -2.18104400 0.67012000  
C 6.91613700 0.19557400 -0.23923200  
C 6.99048200 -2.17243600 0.34475900  
H 5.13637200 -3.08584800 1.01375500  
C 7.62867600 -1.00578600 -0.10310700  
H 7.41086500 1.09657300 -0.59640700  
H 7.56666800 -3.09111500 0.43782200  
H 8.68693200 -1.02973700 -0.35357000  
C 4.76833500 2.54737700 -0.27195600  
H 4.25100000 3.19646600 0.44293200  
H 5.83472100 2.78976100 -0.24534200  
H 4.38518600 2.76979200 -1.27818500  
N 3.57237400 -0.73846700 0.79243000  
C 2.17446900 1.29915200 0.60163800  
C 0.99781200 0.74444200 1.10832400  
H -1.35812900 -1.44583300 -0.19179000  
H 2.19150300 2.32602200 0.25150500  
C -0.24724400 1.35736300 1.29197300  
H 1.10094600 -0.29347300 1.41168600  
N 4.58597600 1.16306800 0.08978500  
C -1.35617900 0.61650300 1.84350200  
C -1.05701300 -0.70872200 2.53617300  
C -2.40588000 1.39945100 2.62008800  
H -0.41779500 -0.53623500 3.41235000  
H -1.98752500 -1.16910900 2.88039000  
H -0.56553100 -1.42102200 1.87347400  
H -3.25320900 0.76105000 2.88627200  
H -1.95528900 1.76254100 3.55551900  
H -2.78856200 2.26459900 2.07917100  
C -0.41284600 2.79506500 0.82867500  
C -0.66213600 2.94881400 -0.68721500  
H 0.49392300 3.36494800 1.08736000  
H -1.22700800 3.30121400 1.36177900  
C -0.77800700 4.40837400 -1.14577100  
H 0.15242600 2.45557200 -1.23372500  
H -1.57648900 2.40269700 -0.95129200  
C -1.02578400 4.55410900 -2.65175000  
H -1.59288200 4.90169700 -0.59391400  
H 0.14015700 4.95104800 -0.87369400  
H -1.10812500 5.60666200 -2.95296600  
H -0.20952000 4.10348100 -3.23036800  
H -1.95347400 4.04827800 -2.94822900  
O -0.93465200 -2.33707500 -0.26388500  
C -0.15465600 -2.48115100 -1.45399800  
C 0.21285100 -1.11572600 -2.05220600  
C 1.11743000 -3.24290400 -1.04955300  
C -0.96949500 -3.30884400 -2.46754100  
H -0.68805100 -0.55307600 -2.32426800  
H 0.78289800 -0.51951200 -1.33391000  
H 0.82175200 -1.24168500 -2.95671600  
H 0.84439700 -4.17516600 -0.54024000  
H 1.72576700 -3.49522000 -1.92787500  
H 1.72720400 -2.63983700 -0.36831900  
H -0.39739000 -3.50758900 -3.38368900  
H -1.25713500 -4.26856500 -2.02271500  
H -1.88826300 -2.77838300 -2.74525500  
O -2.32598500 -0.04323700 0.44706800  
Si -3.88504100 0.09522000 -0.16072600  
C -4.79592200 1.73115300 0.29105400  
H -5.71084700 1.82612900 -0.30731800  
H -5.07908500 1.79823200 1.34647100  
H -4.16284400 2.59621700 0.06070400  
C -3.79315200 0.11547100 -2.07859700  
H -3.23540000 0.99745600 -2.41559800  
H -3.27760100 -0.76751800 -2.47034000  
H -4.79104300 0.15486900 -2.53418500  
C -5.03479000 -1.40062300 0.37920800  
C -6.46873600 -1.19860400 -0.14787400  
H -6.49468200 -1.10854400 -1.24141400  
H -7.10269600 -2.05822400 0.12290800  
H -6.94038000 -0.30099700 0.27215900  
C -5.08202200 -1.50532600 1.91457900  
H -5.73285500 -2.33812900 2.22625900  
H -4.08617000 -1.69061400 2.33052300  
H -5.47757100 -0.59163900 2.37867400  
C -4.46905300 -2.71670000 -0.19193200  
H -5.05177100 -3.57720400 0.17540500

57

H -4.52362500 -2.73320900 -1.28815000  
H -3.41979400 -2.86937500 0.08338600  
C -2.43513700 0.09327800 -0.86758100  
C -3.54694100 -1.68004600 -0.26358000  
C -4.53162700 -0.74031500 -0.69583000  
C -3.97630600 -2.93686000 0.18869100  
C -5.89233200 -1.01563000 -0.67752000  
C -5.34813600 -3.22312500 0.20291700  
H -3.24426900 -3.66912100 0.52014000  
C -6.29699700 -2.28480600 -0.22155200  
H -6.62894100 -0.28057500 -0.99750600  
H -5.68365400 -4.19771500 0.55461900  
H -7.35638600 -2.53151400 -0.19627400  
C -4.33480400 1.57606700 -1.67263000  
H -3.69493800 1.90042500 -2.50195900  
H -5.33714200 1.37824300 -2.06621700  
H -4.40286400 2.40482000 -0.95097900  
N -2.28612300 -1.15750800 -0.36783400  
C -1.42591400 1.02928900 -1.14410700  
C -0.04803100 0.67210000 -1.08760100  
H 0.61406200 1.05492000 1.18963200  
H -1.72032400 2.03212600 -1.43923700  
C 1.05940400 1.45413600 -1.29251700  
H 0.13531300 -0.37490700 -0.86534100  
N -3.80406800 0.37397100 -1.08716500  
C 2.47049800 0.84876500 -1.30210500  
C 3.05076400 0.84242500 -2.73661200  
C 3.41363000 1.62858600 -0.36005700  
H 3.07392300 1.85000400 -3.16774100  
H 4.07553600 0.44705800 -2.74808600  
H 2.42315800 0.20996700 -3.37161800  
H 4.43780300 1.23258200 -0.39860600  
H 3.46514100 2.68280100 -0.65339300  
H 3.04806100 1.58213800 0.66940600  
C 0.91945000 2.92536500 -1.64234500  
C 0.57645400 3.85143000 -0.45386500  
H 0.12907300 3.04902600 -2.40217300  
H 1.83672900 3.30756800 -2.11448200  
C 0.46146800 5.33003800 -0.84708700  
H -0.36848100 3.51642300 -0.00876900  
H 1.33481600 3.73575000 0.33219400  
C 0.10107500 6.24558900 0.32890700  
H 1.41113300 5.66568300 -1.29173200  
H -0.29553900 5.43853000 -1.63822800  
H 0.02422000 7.29646700 0.02024800  
H -0.85990800 5.95599100 0.77212500  
H 0.85742900 6.18473000 1.12179800  
O 0.90995200 1.17488400 2.11512900  
C -0.21477400 1.02434100 2.99583100  
C 0.34279200 1.32069500 4.39317300  
C -1.30731100 2.03929300 2.62237000  
C -0.76284100 -0.40963200 2.92055700  
H 1.13821800 0.60967100 4.64440500  
H 0.76613100 2.33126500 4.42723300  
H -0.44374000 1.24470800 5.15336400  
H -1.66261000 1.85150500 1.60225700  
H -2.16563300 1.96704000 3.30269900  
H -0.90929000 3.05986800 2.67065200  
H -1.59189700 -0.55102700 3.62659500  
H -1.13466500 -0.64479300 1.91598000  
H 0.02732400 -1.12654900 3.17386600  
O 2.37520900 -0.52950300 -0.90189000  
Si 3.39149900 -1.59373300 -0.05427900  
C 5.11308000 -1.75160900 -0.88836800  
H 5.72739000 -2.49559400 -0.36587800  
H 5.02666800 -2.06076500 -1.93587900  
H 5.65845900 -0.80118100 -0.86577500  
C 3.64289600 -1.07369200 1.76636800  
H 4.48214700 -0.37653700 1.87118200  
H 2.74424100 -0.56972600 2.13905100  
H 3.84988000 -1.94397200 2.40180900  
C 2.46273500 -3.29370200 -0.16763100  
C 3.34788700 -4.40992400 0.42415200  
H 3.59265400 -4.22769800 1.47891700  
H 2.82083000 -5.37468400 0.37634500  
H 4.29177400 -4.52586900 -0.12415600

|   |            |             |             |
|---|------------|-------------|-------------|
| C | 2.15589300 | -3.61790200 | -1.64347600 |
| H | 1.60457300 | -4.56759400 | -1.71730600 |
| H | 1.54134700 | -2.83477600 | -2.09803000 |
| H | 3.07150400 | -3.72316000 | -2.24158400 |
| C | 1.13511500 | -3.23735400 | 0.61700000  |
| H | 0.64206000 | -4.22121000 | 0.58505800  |
| H | 1.29622000 | -2.98822800 | 1.67360500  |
| H | 0.42968900 | -2.50893200 | 0.20374100  |

|   |            |             |             |
|---|------------|-------------|-------------|
| H | 5.02776400 | -2.66536500 | 1.08414000  |
| C | 1.94184300 | -3.63602800 | 0.22651100  |
| C | 2.78550500 | -4.91024700 | 0.43398600  |
| H | 3.59457400 | -4.75684000 | 1.15993000  |
| H | 2.15318300 | -5.72441000 | 0.81946500  |
| H | 3.23691300 | -5.26468800 | -0.50176700 |
| C | 0.82098400 | -3.92822500 | -0.79110800 |
| H | 0.19423200 | -4.76077000 | -0.43644300 |
| H | 0.16844400 | -3.06056700 | -0.92968600 |
| H | 1.22184800 | -4.21673600 | -1.77203500 |
| C | 1.30019000 | -3.23082700 | 1.56840400  |
| H | 0.66003600 | -4.04400300 | 1.94354600  |
| H | 2.05386600 | -3.02259500 | 2.33812400  |
| H | 0.67445700 | -2.33946600 | 1.46002300  |

## TS<sub>57-TP2</sub>

|    |             |             |             |
|----|-------------|-------------|-------------|
| C  | -2.73402700 | 0.10838200  | -0.34771500 |
| C  | -4.00585800 | -1.57531200 | 0.11748800  |
| C  | -4.88132900 | -0.46412500 | -0.03442500 |
| C  | -4.54687900 | -2.83113700 | 0.42581800  |
| C  | -6.26287600 | -0.57423500 | 0.10406500  |
| C  | -5.93105900 | -2.94777500 | 0.57060100  |
| H  | -3.88911700 | -3.68739500 | 0.54707900  |
| C  | -6.77944300 | -1.83880500 | 0.41303100  |
| H  | -6.92356000 | 0.28012500  | -0.02557100 |
| H  | -6.36358500 | -3.91721000 | 0.80927600  |
| H  | -7.85385800 | -1.96161900 | 0.52884500  |
| C  | -4.45988400 | 1.97546500  | -0.51488700 |
| H  | -4.52491200 | 2.24246100  | -1.57876900 |
| H  | -5.44304400 | 2.12285300  | -0.05856000 |
| H  | -3.75219700 | 2.65323200  | -0.02905900 |
| N  | -2.69994100 | -1.19813100 | -0.08295000 |
| C  | -1.61970600 | 0.95938400  | -0.65997800 |
| C  | -0.32304800 | 0.51519800  | -0.60934900 |
| H  | 1.38291500  | 1.63611100  | 0.29774100  |
| H  | -1.84367300 | 1.97422300  | -0.97250800 |
| C  | 0.89957500  | 1.24192100  | -0.86945300 |
| H  | -0.19453200 | -0.51506800 | -0.28888300 |
| N  | -4.04708900 | 0.60406800  | -0.31902300 |
| C  | 2.04459800  | 0.32196700  | -1.41889400 |
| C  | 1.80423600  | -0.03749700 | -2.89948800 |
| C  | 3.42080500  | 0.98358700  | -1.22957900 |
| H  | 1.72971000  | 0.86526800  | -3.51605500 |
| H  | 2.62015900  | -0.64943200 | -3.30384000 |
| H  | 0.86725000  | -0.59588400 | -2.99740500 |
| H  | 4.22398600  | 0.30684500  | -1.55151600 |
| H  | 3.50940800  | 1.89232800  | -1.83514200 |
| H  | 3.54618200  | 1.26425400  | -0.17980800 |
| C  | 0.72989300  | 2.55451700  | -1.67175200 |
| C  | 0.38706500  | 3.80362400  | -0.83815900 |
| H  | -0.03690000 | 2.42371300  | -2.45575900 |
| H  | 1.66031300  | 2.78019400  | -2.20958200 |
| C  | 0.30322400  | 5.07985400  | -1.68486900 |
| H  | -0.56843500 | 3.65692300  | -0.31505200 |
| H  | 1.14288800  | 3.90119300  | -0.05050100 |
| C  | -0.03795300 | 6.32867300  | -0.86298700 |
| H  | 1.26287000  | 5.23809100  | -2.20042800 |
| H  | -0.44712800 | 4.95199400  | -2.48102600 |
| H  | -0.08446100 | 7.23080600  | -1.48752600 |
| H  | -1.00917200 | 6.21840100  | -0.36332200 |
| H  | 0.71236600  | 6.49883700  | -0.08107300 |
| O  | 2.10264700  | 2.25628600  | 1.26328900  |
| C  | 1.69447200  | 2.10183200  | 2.58134600  |
| C  | 2.54386100  | 3.06158200  | 3.45014100  |
| C  | 0.19629600  | 2.45721900  | 2.76838500  |
| C  | 1.92916200  | 0.65021000  | 3.07157100  |
| H  | 3.60801500  | 2.82908300  | 3.31992000  |
| H  | 2.38581800  | 4.09539000  | 3.11923400  |
| H  | 2.30035300  | 2.99641400  | 4.52163600  |
| H  | -0.43179900 | 1.80735100  | 2.14842300  |
| H  | -0.13115900 | 2.35418200  | 3.81375300  |
| H  | 0.01882200  | 3.49335900  | 2.45433400  |
| H  | 1.64426500  | 0.50179200  | 4.12419600  |
| H  | 1.35254200  | -0.04995700 | 2.45741000  |
| H  | 2.99133400  | 0.39760800  | 2.96239200  |
| O  | 1.98709200  | -0.90732600 | -0.65818000 |
| Si | 3.06861700  | -2.19551300 | -0.43134300 |
| C  | 3.94787900  | -2.76288000 | -2.04004000 |
| H  | 4.59325700  | -3.62504300 | -1.82950400 |
| H  | 3.23458700  | -3.05728600 | -2.81709900 |
| H  | 4.58244200  | -1.97033900 | -2.45187300 |
| C  | 4.43057300  | -1.77712100 | 0.84160800  |
| H  | 5.10924400  | -1.01067100 | 0.45280200  |
| H  | 3.99553700  | -1.38896800 | 1.76763100  |
